# Supplementary material for: A transcriptomics resource reveals a transcriptional transition during ordered sarcomere morphogenesis in flight muscle
Source: eLife. 2018 May 30;7:e34058. doi: 10.7554/eLife.34058 (PMC6005683; doi:10.7554/eLife.34058)
Supplement: Figure 1—source data 1. [file elife-34058-fig1-data1.xlsx]

## Sheet: Fig1_SD1
Indirect flight muscle fiber length [µm]
30 h APF	34 h APF	48 h APF	60 h APF	72 h APF	80 h APF	90 h APF	1 d adult
137.359	199.875	477.382	704.619	680.841	723.782	755.652	828.996
149.935	213.929	462.951	660.817	706.673	825.569	773.43	741.861
137.908	145.358	446.918	679.592	668.953	757.299	783.83	774.657
139.815	146.885	445.332	709.827	689.614	846.43	755.989	893.175
142.049	178.3	442.435	549.792	708.419	754.981	728.716	811.946
127.096	184.402	463.663	654.754	688.397	796.686	705.632	927.615
147.777	153.443	470.251	707.729	678.156	822.226	748.792	793.385
143.532	242.846	462.291	726.713	722.591	896.319	771.759	892.956
163	238.704	469.602	787.219	780.441	727.189	784.68	753.326
147.966	145.721	489.228	703.279	775.777	793.265	755.506	856.042
134.517	138.262	456.614	706.986	766.172	708.777	760.963	774.657
159.072	154.97	521.613	653.144	737.071	815.768	788.349	869.733
160.025	163.798	461.846	672.291	755.675	740.686	739.012	803.499
144.474	162.994	407.901	805.138	712.667	825.803	721.479	912.75
147.775	162.551	432.109	601.338	770.927	863.13	830.536	814.132
113.744	203.657	479.803	513.15	747.406	899.939	775.316	925.812
132.064	208.496	471.885	724.908	781.548	807.866	770.297	802.134
138.109	210.188	459.122	562.924	872.591	801.88	697.683	923.68
180.879	201.487	438.704	616.101	814.892	760.725	699.571	778.958
181.903	214.702	404.273	706.001	843.72	840.564	779.93	928.361
156.644	215.439	486.491	733.99	770.153	730.464	696.544	938.732
151.801		529.701	706.412	827.53	814.513	829.472	849.144
141.152		466.182	735.972	710.593	753.185	830.464	825.094
138.663		527.735	536.201	829.953	808.448	844.625	935.966
148.732		488.947	591.695	843.001	724.837	826.672	816.254
146.878		527.955	633.568	869.168	766.452	799.424	929.253
136.193		517.542	702.79	712.083	735.05	771.633	812.07
135.841		507.234	674.591	823.103	824.184	850.551	899.915
184.767		490.201	646.462	758.109	742.088	869.064	813.748
182.505		486.111	560.419	883.796	820.656	886.394	949.385
166.181		483.271	610.535		755.092	737.999
162.682		510.428	599.974		819.219	783.985
126.625		512.228	695.499		717.776	736.669
129.361		506.703	537.357		817.047	708.831
144.115		514.891	544.24		738.244	693.152
134.723		527.651	770.564		816.911	782.251
179.787		496.174	547.703		721.141	867.593
170.964			702.326		819.628	801.843
163.23			548.245		825.604	882.246
163.182					897.844	934.393
179.787						822.718
172.035						777.75
164.741						839.189
165.731						753.115
137.179						843.251
135.925						745.56
126.952						745.56
130.481						814.714
133.876						713.613
122.779						844.284
122.071
125.027
140.065
140.075
133.409
128.877
165.002
123.322
