# Supplementary material for: A transcriptomics resource reveals a transcriptional transition during ordered sarcomere morphogenesis in flight muscle
Source: eLife. 2018 May 30;7:e34058. doi: 10.7554/eLife.34058 (PMC6005683; doi:10.7554/eLife.34058)
Supplement: Figure 5—source data 1. [file elife-34058-fig5-data1.xlsx]

## Sheet: Fig5_SD1
Sarcomeres per Myofibril
30 h APF	34 h APF	48 h APF	60 h APF	72 h APF	80 h APF	90 h APF	1 d adult
75.8457	110.365	232.28	294.684	240.92	247.548	257.949	255.94
82.7898	118.126	225.258	276.365	250.061	282.361	264.017	229.038
76.1488	80.2625	217.457	284.218	236.714	259.011	267.567	239.164
77.2018	81.1057	216.685	296.862	244.025	289.496	258.063	275.754
78.4354	98.4521	215.276	229.933	250.679	258.218	248.754	250.676
70.1788	101.822	225.605	273.83	243.594	272.482	240.874	286.387
81.5982	84.7268	228.81	295.985	239.97	281.217	255.607	244.946
79.2542	134.093	224.937	303.924	255.694	306.559	263.447	275.687
90.0039	131.805	228.495	329.229	276.165	248.713	267.858	232.578
81.7026	80.463	238.044	294.124	274.514	271.312	257.899	264.29
74.2764	76.3443	222.175	295.674	271.115	242.416	259.761	239.164
87.835	85.57	253.802	273.157	260.818	279.009	269.11	268.517
88.3612	90.4446	224.721	281.164	267.401	253.329	252.268	248.068
79.7744	90.0006	198.473	336.723	252.182	282.441	246.283	281.798
81.5971	89.756	210.252	251.49	272.798	295.207	283.511	251.351
62.8062	112.454	233.458	214.609	264.475	307.797	264.661	285.831
72.9219	115.126	229.605	303.17	276.556	276.306	262.948	247.647
76.2598	116.06	223.395	235.425	308.772	274.259	238.16	285.172
99.8762	111.255	213.46	257.664	288.355	260.183	238.805	240.492
100.442	118.552	196.707	295.262	298.556	287.489	266.236	286.618
86.4943	118.959	236.712	306.968	272.524	249.833	237.771	289.819
83.8201		257.737	295.434	292.827	278.579	283.148	262.161
77.9401		226.831	307.797	251.448	257.604	283.486	254.735
76.5657		256.78	224.249	293.685	276.505	288.32	288.966
82.1255		237.907	247.458	298.302	247.908	282.192	252.006
81.1018		256.887	264.969	307.561	262.142	272.89	286.893
75.2019		251.821	293.919	251.976	251.401	263.404	250.714
75.0075		246.805	282.126	291.261	281.887	290.343	277.835
102.023		238.517	270.362	268.262	253.809	296.663	251.232
100.774		236.527	234.377	312.737	280.68	302.578	293.108
91.7604		235.145	255.337		258.256	251.923
89.8283		248.359	250.92		280.189	267.62
69.9187		249.235	290.87		245.493	251.469
71.4294		246.547	224.732		279.446	241.966
79.5762		250.531	227.611		252.494	236.614
74.3902		256.74	322.264		279.399	267.028
99.2732		241.424	229.059		246.644	296.161
94.4014			293.725		280.329	273.716
90.1309			229.286		282.373	301.162
90.1044					307.08	318.963
99.2732						280.842
94.9928						265.492
90.9652						286.465
91.5119						257.082
75.7463						287.851
75.0539						254.504
70.0992						254.504
72.0479						278.11
73.9225						243.598
67.795						288.204
67.4041
69.0363
77.3399
77.3454
73.6646
71.1622
91.1094
68.0949
