# Supplementary material for: A transcriptomics resource reveals a transcriptional transition during ordered sarcomere morphogenesis in flight muscle
Source: eLife. 2018 May 30;7:e34058. doi: 10.7554/eLife.34058 (PMC6005683; doi:10.7554/eLife.34058)
Supplement: Figure 5—source data 3. — Note that image analysis is limited by pixel size and thus can result in the same number. [file elife-34058-fig5-data3.xlsx]

## Sheet: Fig5_SD3
Myofibril (sarcomere) width in wildtype indirect flight muscle [µm]
34 h APF	48 h APF	56 h APF	60 h APF	72 h APF	80 h APF	90 h APF	1 d adult
0.332	0.332	0.415	0.457	0.581	0.83	0.747	0.913
0.332	0.332	0.457	0.498	0.623	0.83	0.747	0.913
0.332	0.374	0.457	0.498	0.623	0.83	0.747	0.913
0.332	0.374	0.467	0.498	0.623	0.913	0.83	0.996
0.415	0.374	0.467	0.54	0.623	0.913	0.83	0.996
0.415	0.374	0.467	0.54	0.623	0.913	0.83	0.996
0.415	0.415	0.467	0.581	0.664	0.913	0.83	0.996
0.415	0.415	0.467	0.581	0.664	0.913	0.83	0.996
0.415	0.415	0.498	0.581	0.675	0.913	0.83	0.996
0.415	0.415	0.498	0.581	0.706	0.913	0.83	0.996
0.415	0.415	0.498	0.581	0.706	0.913	0.913	1.079
0.415	0.415	0.519	0.581	0.706	0.913	0.913	1.079
0.415	0.415	0.519	0.581	0.706	0.913	0.913	1.079
0.415	0.415	0.519	0.581	0.706	0.913	0.913	1.079
0.415	0.415	0.519	0.581	0.706	0.913	0.913	1.079
0.415	0.415	0.519	0.623	0.706	0.996	0.913	1.079
0.415	0.415	0.54	0.623	0.706	0.996	0.913	1.079
0.415	0.415		0.623	0.706	0.996	0.913	1.079
0.415	0.415		0.623	0.706	0.996	0.913	1.079
0.498	0.415		0.623	0.726	0.996	0.913	1.079
0.498	0.415		0.623	0.726		0.913	1.079
0.498	0.415		0.664	0.747		0.913	1.079
0.498	0.415		0.664	0.747		0.913	1.162
0.498	0.415		0.664	0.747		0.996	1.162
0.498	0.415		0.664	0.747		0.996	1.162
0.498	0.415		0.664	0.747		0.996	1.162
0.498	0.415		0.664	0.747		0.996	1.162
0.498	0.415		0.664	0.747		0.996	1.162
0.498	0.415		0.664	0.747		0.996	1.162
0.498	0.415		0.664	0.747		0.996	1.162
0.498	0.415		0.664	0.747			1.162
0.581	0.415		0.664	0.747			1.162
0.581	0.415		0.664	0.747			1.162
0.581	0.415		0.664	0.747			1.162
0.581	0.415		0.664	0.789			1.162
0.581	0.415		0.664	0.789			1.162
	0.415		0.664	0.83			1.162
	0.415		0.664	0.83			1.245
	0.415		0.664	0.83			1.245
	0.415		0.706	0.83			1.245
	0.457		0.706	0.83			1.245
	0.457		0.706	0.83			1.245
	0.457		0.747	0.83			1.245
	0.457		0.747	0.83			1.328
	0.457		0.747	0.83			1.328
	0.457		0.747	0.83
	0.457		0.747	0.83
	0.498			0.83
	0.498			0.83
	0.498			0.83
	0.498			0.83
	0.498			0.83
	0.498			0.83
	0.498			0.83
	0.498			0.83
				0.913
				0.913
				0.913
				0.913
				0.913
				0.913
				0.996
				0.996
				0.996
