# Supplementary material for: A transcriptomics resource reveals a transcriptional transition during ordered sarcomere morphogenesis in flight muscle
Source: eLife. 2018 May 30;7:e34058. doi: 10.7554/eLife.34058 (PMC6005683; doi:10.7554/eLife.34058)
Supplement: Figure 5—source data 4. [file elife-34058-fig5-data4.xlsx]

## Sheet: Fig5_SD4
Myofiber cross-sectional area (myofibers 3&4) µm2								Myofiber cross-sectional area (all myofibers) µm2
30 h APF	48 h APF	60 h APF	72 h APF	80 h APF	90 h APF	1 d adult		30 h APF	48 h APF	60 h APF	72 h APF	80 h APF	90 h APF	1 d adult
1273.21	1263.56	2864.9	3098.59	6024.84	7260.83	5136.97		971.282	1263.56	2292.06	2659.48	5122.49	2323.77	6811.38
1315.95	1225.65	1963.24	2628.46	7128.48	4978.42	5327.23		1273.21	1225.65	2128	2753.92	6826.55	3145.47	8772.56
1542.06	1561.36	2633.28	3654.89	6163.4	5937.3	5489.91		1901.89	1357.31	2864.9	3098.59	6024.84	7260.83	6893.41
1471.74	1156.71	2225.19	2742.2	6653.52	6055.86	6094.47		1315.95	1093.98	1963.24	2628.46	7128.48	4978.42	8174.9
1090.54	2125.24	3536.32	5338.95	4875.02	5962.11	6261.29		1683.37	1561.36	2395.46	3380.53	6095.16	8975.91	8720.86
1325.6	1764.02	2798.04	4553.79	3271.61	4320.79	6340.56		1623.4	1156.71	2150.06	2556.77	5099.75	4458.66	8185.24
1187.73	1835.03	3816.88	4618.59	2405.11	5134.21	6439.83		1542.06	1145.68	1955.66	2656.72	3770.01	5345.84	7346.31
1365.59	1957.73	3085.49	4047.81	5032.88	4808.85	6462.57		1705.43	1074.68	1765.4	2582.96	5827	4738.53	6412.94
1402.81	1886.04	4253.93	5892.49	3792.76	4800.57	6612.16		1471.74	2146.61	2633.28	3654.89	6163.4	5937.3	4027.82
1264.25	1543.43	3162.01	5578.15	4781.27	4320.1	6632.15		1909.47	2201.07	2225.19	2742.2	6653.52	6055.86	4009.9
1237.37	1761.96	4007.83	4979.8	4436.6	5471.99	6651.45		1322.85	2125.24	2425.1	3580.44	5607.1	7221.54	8574.72
1215.31	1584.8	3410.17	4619.97	4451.77	5606.41	6811.38		1090.54	1764.02	2012.19	2758.74	3798.27	3242.66	9170.31
1699.92	1805.38	2597.44	6410.19	5487.85	4846.76	6834.13		1325.6	1759.89	2296.89	4402.82	3178.55	5458.89	8194.89
1496.56	2217.61	2744.96	5196.26	5328.86	5335.5	6853.43		1320.09	1770.23	2397.53	4141.56	4875.02	5101.13	8880.09
1940.5	1990.13	2793.21	6057.93	4891.57	5586.42	6882.38		1208.41	1442.79	3536.32	5338.95	3271.61	5962.11	4999.1
1304.92	1997.02	2703.6	4753.7	4554.48	5423.05	6936.84		1187.73	1888.8	2798.04	4553.79	4200.16	4320.79	2758.74
1404.88	2190.04	4187.06	4179.48	5442.35	6352.28	6982.34		1365.59	1835.03	2503.69	4967.39	3508.75	4128.47	6936.84
1433.83	2003.23	3186.14	3474.97	6251.64	5560.23	6987.16		1548.26	1957.73	2041.14	4302.18	2795.28	5373.42	9264.75
1649.59	1853.64	4411.1	4162.93	5462.34	6308.16	7062.3		1004.37	2589.17	2756.68	3230.94	2789.76	4831.59	9346.09
1644.08	1845.37	3503.23	3594.23	6245.43	5243.13	7074.71		1402.81	1586.17	3056.54	3580.44	2405.11	4354.57	10255.3
1292.52	2147.3	3476.35	5157.65	4907.42	4283.57	7268.41		1264.25	1233.23	3816.88	4618.59	5032.88	5134.21	8221.77
1307.68	2114.9	2256.9	4391.79	4460.73	4144.32	7275.31		1495.87	1749.55	3085.49	4047.81	3523.91	4808.85	10807.5
1534.47	2019.77	2975.89	5229.34	4928.79	3841.01	7285.65		1197.39	1886.04	2785.63	4814.36	7137.44	6065.51	9760.38
1912.23	2206.58	2130.75	4621.34	4469.69	4460.04	7308.4		979.554	1543.43	2271.38	4249.79	3381.91	4692.35	10457.3
1526.2	1760.58	2991.05	5561.61	4628.93	4193.95	7380.78		1237.37	1894.31	2416.14	3885.13	2915.22	4136.74	8161.8
1563.43	1690.95	2082.5	5585.73	4997.73	3960.95	7393.88		1215.31	1292.52	3106.86	6115.84	3792.76	3994.04	10242.9
1520.69	1591.69	2600.2	5836.65	4979.11	4902.6	7422.83		1883.28	872.706	4253.93	5892.49	4781.27	4800.57	10801.3
1693.71	1739.9	2245.87	5939.36	4298.04	4277.36	7561.39		1599.27	1599.96	3162.01	5578.15	5354.11	4320.1	9973.39
1687.51	1614.44	1992.89	3367.43	7949.48	4425.57	7595.16		1007.82	1761.96	2709.8	4377.32	4062.98	5392.72	9585.29
1544.81	2204.51	1806.07	3000.01	7263.59	5434.08	7732.34		1410.39	1584.8	2516.1	3903.74	3153.74	3918.91	8411.34
1537.92	1918.44	1931.53	3672.12	5538.17	4133.29	7846.08		1699.92	1682.68	2893.86	4997.73	2803.55	3980.95	4827.46
1648.21	1899.13	1489.67	2903.51	5872.5	4186.37	7852.98		1496.56	1294.58	4007.83	4979.8	4436.6	3675.57	7280.13
1662	1872.94	2146.61	4397.31	5096.99	5051.49	7862.63		1650.97	1805.38	3101.82	4619.97	4451.77	5471.99	9654.92
1883.97	1750.93	1658.56	4149.15	3156.49	4910.18	7868.14		1177.39	2217.61	3410.17	5726.36	4284.26	5606.41	7561.39
1803.32	1484.15	2362.37	4958.43	4599.98	4946.71	7869.52		1107.08	1990.13	3121.34	5551.27	3951.99	4592.39	8259
1901.89	1804.7	1617.19	3543.9	3110.31	4417.99	7879.17		1132.59	2400.98	2618.12	4220.15	4622.72	3606.63	5980.73
1326.98	1396.61	1721.29	3185.45	3842.39	4898.46	8026		1940.5	1997.02	2385.81	4189.13	4871.57	5006	4212.56
1831.58	2121.79	2202.45	2731.17	3200.61	4622.72	8161.8		1304.92	2741.51	2597.44	6410.19	5487.85	4462.8	5913.17
1906.72	1602.72	2679.47	3279.89	3637.65	6149.61	8162.49		1832.96	1296.65	2744.96	5196.26	5328.86	4846.76	5756
1606.86	1987.37	1630.98	2915.22	3976.12	6322.64	8185.24		1385.58	2105.94	1639.94	5706.37	5043.22	5335.5	11012.9
1797.11	1619.95	1872.94	3977.5	7011.98	7429.72	8296.22		1206.35	2190.04	2793.21	5880.77	4118.81	6001.41	7852.98
1801.94	2217.61	2017.01	2496.11	5906.97	5818.73	8316.21		1253.91	2003.23	2703.6	4433.84	3874.79	5276.22	8503.72
1582.04	1556.53	2267.93	2349.97	5000.48	4986.01	8321.04		1404.88	2601.57	2593.3	4569.64	3677.64	4377.32	4783.34
1639.94	1954.28	2034.94	2554.7	5601.59	5736.01	8498.2		1433.83	2384.43	2112.14	6057.93	4891.57	4369.05	7033.35
1977.03	1673.72	3550.11	4035.4	6179.94	4684.07	8503.72		1826.76	1589.62	2668.44	4753.7	4554.48	5586.42	8321.04
1904.65	2103.18	2308.6	3266.1	6356.42	4067.11	8574.72		1872.25	1622.71	3215.78	4849.52	4213.25	5423.05	7879.17
1755.06	1540.68	3544.59	2979.33	6435	4969.46	8644.34		1293.2	1853.64	4187.06	2935.91	5139.73	6132.38	7026.46
1324.22	2134.89	2602.26	3858.93	5797.36	4726.12	8649.17		1473.81	1845.37	3186.14	3447.4	6063.45	4546.21	5351.36
	1747.48	2159.71	4826.77	6838.95	6540.47	8702.93		1649.59	1666.83	2485.76	5635.36	5696.95	4383.52	4386.28
	2236.22	2179.7	3250.93	6399.85	5557.47	8720.86		1644.08	1793.67	2368.58	4179.48	5442.35	4103.65	6483.94
	1954.28	2122.48	4102.27	7091.25	7074.71	8746.36		2076.3	1909.47	2649.14	3474.97	6251.64	6352.28	8746.36
	2012.19	1351.8	4204.98	3929.93	4959.12	8772.56		1196.7	2147.3	4060.91	3441.19	7897.78	5560.23	6882.38
	2093.53		4444.18	7026.46	3972.67	8868.38		1529.65	2114.9	4411.1	3298.5	5767.72	5079.07	7841.95
			3942.34	6164.09	4564.82	8949.72		1120.18	1906.03	3503.23	3117.2	5161.79	4093.31	5733.94
			2891.1	5678.79	4308.38	9170.31		1292.52	1690.27	2757.36	4162.93	5462.34	4619.97	7681.33
			2396.84	5126.63	3594.91	9264.75		1307.68	1735.76	2339.62	3594.23	6245.43	4262.89	5656.73
			3014.49	4232.56	6555.64	9585.29		1626.16	2019.77	1764.71	3501.85	4597	6308.16	7869.52
			2127.31	3449.46	6828.61	9654.92		1065.72	2206.58	1280.8	2985.54	6300.58	5243.13	6834.13
			3776.21	3988.53	6659.04	9760.38		1142.24	2439.58	3476.35	4061.6	3326.07	5758.07	8132.16
			3436.37	3443.26	4624.79	9973.39		1201.52	1773.67	2256.9	3735.54	4058.84	4671.67	6184.08
			4436.6	6492.22	2900.75			1534.47	1451.75	3035.17	5157.65	4907.42	4495.88	7677.88
			3339.86	6221.99	3859.62			2398.91	1760.58	1926.71	4391.79	4460.73	4949.47	5473.37
			6112.39	4409.03	5960.05			1912.23	1690.95	1978.41	5748.42	5662.25	4283.57	8026
			5624.34	7479.35	2039.76			1759.2	1591.69	2042.52	4974.29	4699.93	4144.32	6612.16
			5669.83		6786.56			1257.36	1209.79	2975.89	3846.53	3377.08	5690.51	8261.07
			4696.48		5823.56			1524.82	1280.8	2130.75	4011.28	4812.98	4798.51	4842.62
					8336.89			1526.2	1178.77	2471.29	5229.34	4928.79	3764.49	6736.93
					6860.32			1563.43	2003.23	2185.9	4621.34	4469.69	4537.24	5899.38
					6382.61			1798.49	1739.9	2127.31	5833.9	4457.28	3841.01	7422.83
					5958.67			1516.55	1614.44	1890.86	4497.95	4625.48	4460.04	7268.41
					6839.65			1498.63	1218.07	2991.05	4817.81	3299.19	5045.98	6605.27
					5899.38			1656.49	1546.19	2082.5	4033.34	3691.42	4582.74	6075.16
								1520.69	2204.51	2265.18	5561.61	4628.93	3607.32	7220.16
								1693.71	1918.44	1746.79	5585.73	4997.73	2895.92	5425.81
								2123.86	2109.38	2226.57	6166.16	4211.19	4193.95	8296.22
								1809.52	1781.26	2014.26	5532.65	2858.7	3960.95	7862.63
								1318.71	1416.6	2600.2	5234.86	2609.85	3940.96	6415.01
								1524.13	1899.13	2245.87	5050.8	3841.01	3669.36	5909.72
								1687.51	1872.94	2266.55	5836.65	4979.11	4391.1	6439.14
								1544.81	2021.84	1808.83	5939.36	4298.04	3796.89	5378.24
								1838.47	1689.58	1517.93	5786.33	4983.94	4902.6	7868.14
								1392.47	1295.27	1355.93	5506.46	3598.36	4277.36	7595.16
								1503.45	1565.49	1992.89	2691.19	3043.45	4305.63	7491.07
								1568.25	1750.93	1806.07	2931.08	5434.08	3451.53	5813.9
								1537.92	1484.15	1637.88	3367.43	5949.48	4047.12	6461.89
								1648.21	1516.55	1366.96	3000.01	5263.59	4370.42	5610.55
								2208.65	1155.34	1452.44	3075.15	4464.86	4425.57	6632.15
								1766.78	1275.28	1956.35	2789.76	6116.31	5434.08	6261.29
								1662	1520	1931.53	2512.65	5819.42	5716.02	6937.53
								2241.05	1804.7	1489.67	2280.34	8106.65	4648.23	6072.41
								1883.97	1396.61	1756.44	3672.12	5538.17	4584.12	5895.94
								2281.72	1388.33	1522.76	2903.51	5872.5	5915.24	6375.03
								1803.32	1198.77	1651.66	2785.63	4145.01	4133.29	7732.34
								2403.04	802.393	1816.41	2595.37	3734.16	4186.37	6982.34
								1901.89	1777.12	2146.61	2716.69	3402.59	5211.42	6554.26
								2243.81	2121.79	1658.56	3424.65	5096.99	3773.45	5982.1
								1792.29	1602.72	1944.63	4397.31	3156.49	5818.04	5813.22
								1273.9	1930.85	1342.15	4149.15	4682.01	4699.93	6451.55
								1697.85	1480.02	1889.48	4707.51	3408.79	5051.49	7846.08
								1326.98	821.695	2362.37	3626.62	4401.44	4910.18	6853.43
								1831.58	1633.05	1617.19	3521.16	3064.12	5746.35	7097.46
								1770.92	1987.37	2230.71	3415.69	4599.98	3715.55	5633.99
								2008.74	1619.95	2598.13	4958.43	3110.31	7178.8	6765.2
								1300.79	1781.26	1886.73	3543.9	7302.88	5740.15	6052.42
								1384.2	1438.65	2054.93	4156.04	2723.59	4946.71	8644.34
								1906.72	1796.42	1721.29	3183.38	3148.22	4417.99	6651.45
								1606.86	1743.34	2202.45	3567.34	3842.39	4575.85	7142.27
								1748.86	2217.61	1961.87	2614.67	3200.61	5107.33	6051.04
								1551.71	1556.53	1671.65	3185.45	4083.66	4673.73	5940.05
								1663.38	2195.55	1915.68	2731.17	2969.68	4697.86	6732.8
								1797.11	1426.94	2679.47	3280.57	3185.45	4898.46	7380.78
								1801.94	1460.71	1630.98	2696.01	3156.49	4622.72	7074.71
								1553.09	1774.37	1863.98	2140.41	3637.65	5749.8	7236.7
								1842.61	1954.28	1582.04	3747.95	3976.12	4269.78	5998.65
								1659.24	1673.72	1966	3279.89	3934.07	4904.66	6078.61
								1582.04	2082.5	1832.27	2915.22	3213.02	5574.01	5474.75
								1639.94	1411.08	1872.94	3141.33	2308.6	6149.61	7275.31
								1710.94	1344.22	2017.01	2166.6	2211.41	6322.64	6340.56
								1222.89	1845.37	2870.42	2075.61	7011.98	5614	7125.03
								1597.89	2103.18	1882.59	2158.33	5906.97	4824.7	5432.7
								1977.03	1540.68	2267.93	3977.5	6254.63	3924.42	4701.31
								1904.65	2119.03	2034.94	2496.11	4697.86	5662.94	4031.27
								1606.16	1634.43	2094.22	2060.44	4365.6	7429.72	5489.91
								2090.08	1016.09	2339.62	2427.17	4120.88	5818.73	7285.65
								1529.65	1792.29	3550.11	2084.57	5000.48	4633.75	5599.52
								1755.06	2134.89	2308.6	2576.76	5601.59	3868.58	7179.49
								1324.22	1747.48	2257.59	2349.97	6349.52	4042.3	4783.34
								1611.68	1900.51	1756.44	2554.7	6135.83	4691.66	6377.79
								1524.82	1451.06	2189.35	2064.58	4104.34	4986.01	8949.72
									2236.22	3032.41	3078.6	4460.73	5736.01	8498.2
									1954.28	3544.59	2891.1	6179.94	4748.18	8907.67
									2786.32	2602.26	4035.4	6356.42	4142.94	7351.82
									2329.28	2310.67	3266.1	6684.54	4224.97	6051.73
									2085.95	1932.22	4351.81	6650.08	4775.76	8503.72
									2416.14	1909.47	4151.21	5487.16	4684.07	9793.47
									2012.19	1675.1	2924.19	4506.22	4067.11	8162.49
									3066.88	2159.71	2979.33	6435	4409.72	8868.38
									2093.53	2179.7	3858.93	5797.36	3499.79	7487.63
									2478.87	1721.97	1835.72	6901.69	3477.73	7632.39
									2008.05	1457.27	2951.76	3029.66	3429.47	7489
										1900.51	3417.07	5656.05	4969.46	8649.17
										1846.74	4826.77	6838.95	4726.12	7308.4
										2122.48	3250.93	6399.85	4391.79	8943.51
										1351.8	3489.45	7451.09	4650.3	7033.35
										1661.31	2826.3	5159.03	5839.41	6358.48
										1282.86	3351.58	4095.38	5548.51	9124.12
											3434.3	3647.99	6540.47	8316.21
											4102.27	7091.25	5557.47	8702.93
											4204.98	3929.93	4679.94	7318.74
											3754.84	3106.17	6892.72	5423.74
											4078.14	3233.7	3735.54	7393.88
											4395.93	1795.73	4677.18	7062.3
											3235.08	2325.84	7074.71	7760.6
											4444.18	7026.46	4959.12	5657.42
											3942.34	6164.09	7765.43	6173.05
											5241.06	6638.36	3519.78	6436.38
											3149.6	4950.85	4213.94	6987.16
											2134.89	3163.39	3596.29	6462.57
											2187.28	4501.4	3972.67	5942.81
											2891.1	5678.79	4564.82	6213.03
											2396.84	5126.63	3878.23	4051.26
											2615.36	5655.36	4327	4504.85
											2738.06	5121.81	4904.66	6094.47
											3054.47	2252.77	4997.03	5136.97
											2412.7	2913.16	4308.38	5675.35
											3014.49	4232.56	3594.91	5132.84
											2127.31	3449.46	4558.61	3448.09
											2752.54	3721.75	3584.57	4347.68
											3550.8	3502.54	5567.12	6439.83
											3415.69	2895.92	4840.56	5327.23
											3776.21	2929.01	6555.64	5005.31
											3436.37	3988.53	6828.61	4304.25
											4555.17	3443.26	4768.86
											3343.3	4229.8	6714.19
											3359.85	3376.39	3807.92
											3461.87	3526.67	5277.6
											4436.6	5570.57	6659.04
											3339.86	6492.22	4624.79
											4535.87	6221.99	8129.4
											3816.19	5757.16	3388.11
											2500.24	5052.18	6122.73
											4696.48	2881.45	7091.25
											6112.39	3152.36	2900.75
											5624.34	4409.03	3859.62
											5680.17	7479.35	4480.03
											4611	4492.44	3135.81
											2164.53	3450.15	5537.48
											4053.33	3929.93	6887.21
											5669.83	3106.17	5960.05
											4696.48	3233.7	2039.76
											6809.31	1795.73	6407.43
											5784.26	2325.84	5352.73
												7026.46	5433.39
												6164.09	4298.73
												6638.36	6786.56
												4950.85	5823.56
												3163.39	4724.74
												4501.4	2460.26
												5678.79	5950.39
												5126.63	5378.24
												5655.36	8336.89
												5121.81	6860.32
												2252.77	5323.78
												2913.16	4809.53
												4232.56	5687.07
												3449.46	4981.87
												3721.75	6382.61
												3502.54	5958.67
												2895.92	3976.81
												2929.01	4199.47
												3988.53	5558.16
												3443.26	5888.35
												4229.8	6839.65
												3376.39	5899.38
												3526.67	5858.71
												5570.57	5091.48
												6492.22
												6221.99
												5757.16
												5052.18
												2881.45
												3152.36
												4409.03
												7479.35
												4492.44
												3450.15
