# Supplementary material for: A transcriptomics resource reveals a transcriptional transition during ordered sarcomere morphogenesis in flight muscle
Source: eLife. 2018 May 30;7:e34058. doi: 10.7554/eLife.34058 (PMC6005683; doi:10.7554/eLife.34058)
Supplement: Figure 5—source data 5. [file elife-34058-fig5-data5.xlsx]

## Sheet: Fig5_SD5
Myofibrils per Myofiber (all myofibers)								Myofibrils per Myofiber (myofibers 3&4)
30 h APF	48 h APF	60 h APF	72 h APF	80 h APF	90 h APF	1 d adult		30 h APF	48 h APF	60 h APF	72 h APF	80 h APF	90 h APF	1 d adult
1112.12	1448.64	1996.81	1367.31	2558.69	1028.37	1766.42		1457.83	1448.64	2495.86	1593.07	3009.41	3213.25	1332.19
1457.83	1405.17	1853.88	1415.87	3409.86	1392.01	2275.02		1506.77	1405.17	1710.35	1351.37	3560.68	2203.18	1381.53
2177.67	1556.12	2495.86	1593.07	3009.41	3213.25	1787.69		1765.65	1790.06	2294.08	1879.08	3078.62	2627.52	1423.72
1506.77	1254.22	1710.35	1351.37	3560.68	2203.18	2120.02		1685.15	1326.14	1938.56	1409.84	3323.43	2679.99	1580.5
1927.46	1790.06	2086.89	1738.03	3044.53	3972.25	2261.61		1248.67	2436.53	3080.79	2744.9	2435.07	2638.51	1623.76
1858.79	1326.14	1873.1	1314.51	2547.32	1973.16	2122.7		1517.82	2022.41	2437.61	2341.23	1634.17	1912.15	1644.32
1765.65	1313.5	1703.74	1365.89	1883.12	2365.78	1905.14		1359.96	2103.81	3325.21	2374.55	1201.35	2272.12	1670.06
1952.72	1232.1	1537.99	1327.97	2910.59	2097.02	1663.09		1563.6	2244.49	2688.03	2081.09	2513.92	2128.13	1675.96
1685.15	2461.03	2294.08	1879.08	3078.62	2627.52	1044.55		1606.22	2162.29	3705.96	3029.49	1894.48	2124.47	1714.75
2186.35	2523.47	1938.56	1409.84	3323.43	2679.99	1039.9		1447.57	1769.51	2754.7	2867.88	2388.24	1911.84	1719.94
1514.66	2436.53	2112.71	1840.81	2800.75	3195.86	2223.71		1416.79	2020.04	3491.56	2560.26	2216.08	2421.61	1724.94
1248.67	2022.41	1752.99	1418.35	1897.24	1435.03	2378.17		1391.53	1816.93	2970.89	2375.26	2223.66	2481.09	1766.42
1517.82	2017.66	2001.01	2263.61	1587.69	2415.81	2125.21		1946.4	2069.83	2262.85	3295.66	2741.18	2144.91	1772.32
1511.5	2029.52	2088.69	2129.29	2435.07	2257.48	2302.91		1713.56	2542.43	2391.37	2671.54	2661.16	2361.2	1777.32
1383.63	1654.12	3080.79	2744.9	1634.17	2638.51	1296.43		2221.87	2281.63	2433.4	3114.55	2443.34	2472.25	1784.83
1359.96	2165.45	2437.61	2341.23	2097.98	1912.15	715.434		1494.14	2289.53	2355.33	2444.01	2274.96	2399.95	1798.95
1563.6	2103.81	2181.18	2553.88	1752.62	1827.03	1798.95		1608.59	2510.82	3647.7	2148.79	2718.45	2811.17	1810.75
1772.76	2244.49	1778.21	2211.87	1396.24	2377.98	2402.66		1641.73	2296.65	2775.72	1786.58	3122.69	2460.65	1812.01
1150	2968.41	2401.57	1661.12	1393.49	2138.2	2423.75		1888.79	2125.15	3842.88	2140.28	2728.44	2791.65	1831.49
1606.22	1818.51	2662.81	1840.81	1201.35	1927.1	2659.55		1882.47	2115.66	3051.97	1847.89	3119.59	2320.32	1834.71
1447.57	1413.87	3325.21	2374.55	2513.92	2272.12	2132.18		1479.93	2461.82	3028.54	2651.69	2451.26	1895.67	1884.94
1712.77	2005.81	2688.03	2081.09	1760.19	2128.13	2802.74		1497.3	2424.68	1966.18	2257.95	2228.13	1834.05	1886.73
1371.01	2162.29	2426.8	2475.2	3565.15	2684.27	2531.19		1756.97	2315.61	2592.55	2688.55	2461.93	1699.82	1889.41
1121.59	1769.51	1978.79	2184.94	1689.26	2076.58	2711.93		2189.51	2529.79	1856.28	2375.96	2232.61	1973.77	1895.31
1416.79	2171.78	2104.91	1997.45	1456.15	1830.69	2116.63		1747.5	2018.46	2605.76	2859.38	2312.15	1856.02	1914.08
1391.53	1481.83	2706.65	3144.32	1894.48	1767.55	2656.33		1790.12	1938.63	1814.24	2871.78	2496.36	1752.9	1917.48
2156.36	1000.53	3705.96	3029.49	2388.24	2124.47	2801.13		1741.19	1824.83	2265.25	3000.79	2487.07	2169.62	1924.99
1831.17	1834.31	2754.7	2867.88	2674.38	1911.84	2586.43		1939.3	1994.75	1956.57	3053.59	2146.87	1892.93	1960.92
1153.95	2020.04	2360.74	2250.5	2029.46	2386.52	2485.78		1932.2	1850.91	1736.17	1731.29	3970.77	1958.52	1969.68
1614.9	1816.93	2191.99	2007.02	1575.29	1734.29	2181.34		1768.81	2527.42	1573.42	1542.39	3628.16	2404.83	2005.25
1946.4	1929.15	2521.08	2569.47	1400.37	1761.75	1251.92		1760.92	2199.44	1682.72	1887.94	2766.32	1829.17	2034.75
1713.56	1484.2	3491.56	2560.26	2216.08	1626.61	1887.98		1887.21	2177.31	1297.78	1492.77	2933.31	1852.66	2036.54
1890.36	2069.83	2444.62	2375.26	2223.66	2421.61	2503.84		1902.99	2147.28	1870.09	2260.78	2545.95	2235.51	2039.04
1348.12	2542.43	2970.89	2944.08	2139.99	2481.09	1960.92		2157.15	2007.39	1444.91	2133.19	1576.67	2172.98	2040.47
1267.61	2281.63	2719.26	2854.06	1974.02	2032.34	2141.83		2064.8	1701.54	2058.06	2549.27	2297.69	2189.14	2040.83
1296.81	2752.66	2280.87	2169.7	2309.05	1596.1	1551		2177.67	2069.04	1408.88	1822.02	1553.6	1955.16	2043.33
2221.87	2289.53	2078.48	2153.75	2433.35	2215.38	1092.46		1519.39	1601.17	1499.56	1637.73	1919.27	2167.79	2081.41
1494.14	3143.07	2262.85	3295.66	2741.18	1974.99	1533.48		2097.16	2432.58	1918.74	1404.17	1598.71	2045.77	2116.63
2098.74	1486.58	2391.37	2671.54	2661.77	2144.91	1492.72		2183.19	1837.47	2334.31	1686.28	1817.01	2721.48	2116.81
1586.48	2414.4	1428.69	2933.8	2519.09	2361.2	2856.02		1839.85	2278.47	1420.89	1498.8	1986.07	2798.05	2122.7
1381.27	2510.82	2433.4	3023.47	2057.35	2655.89	2036.54		2057.69	1857.23	1631.68	2044.94	3502.48	3287.99	2151.49
1435.73	2296.65	2355.33	2279.56	1935.46	2334.97	2205.3		2063.22	2542.43	1757.19	1283.32	2950.53	2575.05	2156.67
1608.59	2982.64	2259.25	2349.38	1836.98	1937.16	1240.48		1811.43	1784.52	1975.79	1208.18	2497.74	2206.53	2157.92
1641.73	2733.69	1840.07	3114.55	2443.34	1933.5	1823.98		1877.73	2240.53	1772.81	1313.44	2797.99	2538.45	2203.87
2091.64	1822.46	2324.7	2444.01	2274.96	2472.25	2157.92		2263.7	1918.88	3092.8	2074.72	3086.88	2072.92	2205.3
2143.73	1860.39	2801.54	2493.27	2104.52	2399.95	2043.33		2180.82	2411.24	2011.22	1679.19	3175.03	1799.88	2223.71
1480.72	2125.15	3647.7	1509.43	2567.3	2713.86	1822.19		2009.55	1766.35	3088	1531.76	3214.28	2199.21	2241.77
1687.52	2115.66	2775.72	1772.4	3028.69	2011.9	1387.79		1516.24	2447.59	2267.05	1983.99	2895.78	2091.53	2243.02
1888.79	1910.97	2165.56	2897.3	2845.63	1939.91	1137.51			2003.44	1881.5	2481.58	3416.06	2894.46	2256.96
1882.47	2056.39	2063.47	2148.79	2718.45	1816.05	1681.5			2563.77	1898.92	1671.4	3196.72	2459.43	2261.61
2377.36	2189.16	2307.89	1786.58	3122.69	2811.17	2268.22			2240.53	1849.08	2109.09	3542.08	3130.88	2268.22
1370.22	2461.82	3537.8	1769.21	3944.94	2460.65	1784.83			2306.92	1177.67	2161.9	1963	2194.64	2275.02
1751.45	2424.68	3842.88	1695.85	2880.98	2247.72	2033.68			2400.18		2284.88	3509.72	1758.09	2299.86
1282.61	2185.21	3051.97	1602.64	2578.31	1811.47	1487					2026.87	3078.96	2020.14	2320.96
1479.93	1937.84	2402.18	2140.28	2728.44	2044.55	1992.03					1486.39	2836.56	1906.65	2378.17
1497.3	1990	2038.25	1847.89	3119.59	1886.52	1466.98					1232.28	2560.75	1590.91	2402.66
1861.95	2315.61	1537.39	1800.4	2296.2	2791.65	2040.83					1549.83	2114.16	2901.17	2485.78
1220.25	2529.79	1115.81	1534.95	3147.14	2320.32	1772.32					1093.71	1723.01	3021.97	2503.84
1307.86	2796.91	3028.54	2088.18	1661.37	2548.21	2108.94					1941.46	1992.27	2946.93	2531.19
1375.74	2033.47	1966.18	1920.55	2027.39	2067.43	1603.74					1766.73	1719.91	2046.68	2586.43
1756.97	1664.4	2644.2	2651.69	2451.26	1989.63	1991.13					2280.98	3242.86	1283.71
2746.75	2018.46	1678.52	2257.95	2228.13	2190.37	1419.43					1717.12	3107.89	1708.06
2189.51	1938.63	1723.56	2955.42	2828.29	1895.67	2081.41					3142.55	2202.31	2637.59
2014.28	1824.83	1779.41	2557.42	2347.61	1834.05	1714.75					2891.63	3735.94	902.687
1439.68	1387	2592.55	1977.61	1686.85	2518.31	2142.37					2915.02		3003.36
1745.92	1468.4	1856.28	2062.31	2404.08	2123.56	1255.85					2414.59		2577.19
1747.5	1351.43	2152.95	2688.55	2461.93	1665.96	1747.11							3689.45
1790.12	2296.65	1904.33	2375.96	2232.61	2007.94	1529.91							3036.01
2059.27	1994.75	1853.28	2999.37	2226.41	1699.82	1924.99							2824.59
1736.45	1850.91	1647.29	2312.52	2310.43	1973.77	1884.94							2636.98
1715.93	1396.48	2605.76	2476.97	1647.94	2233.07	1712.97							3026.85
1896.68	1772.67	1814.24	2073.65	1843.87	2028.07	1575.49							2610.74
1741.19	2527.42	1973.39	2859.38	2312.15	1596.4	1872.43
1939.3	2199.44	1521.78	2871.78	2496.36	1281.58	1407.09
2431.82	2418.35	1939.76	3170.2	2103.49	1856.02	2151.49
2071.9	2042.16	1754.79	2844.49	1427.92	1752.9	2039.04
1509.92	1624.09	2265.25	2691.39	1303.62	1744.06	1663.63
1745.13	2177.31	1956.57	2596.76	1918.58	1623.86	1532.59
1932.2	2147.28	1974.59	3000.79	2487.07	1943.26	1669.88
1768.81	2317.98	1575.83	3053.59	2146.87	1680.3	1394.76
2105.05	1937.05	1322.4	2974.92	2489.48	2169.62	2040.47
1594.38	1484.99	1181.27	2831.03	1797.38	1892.93	1969.68
1721.45	1794.8	1736.17	1383.62	1520.21	1905.43	1942.68
1795.65	2007.39	1573.42	1506.95	2714.32	1527.46	1507.74
1760.92	1701.54	1426.89	1731.29	2971.77	1791.04	1675.78
1887.21	1738.69	1190.88	1542.39	2629.16	1934.11	1455
2528.9	1324.56	1265.35	1581.02	2230.2	1958.52	1719.94
2022.96	1462.08	1704.34	1434.3	3055.09	2404.83	1623.76
1902.99	1742.64	1682.72	1291.82	2906.8	2529.6	1799.13
2566	2069.04	1297.78	1172.39	4049.27	2057.05	1574.78
2157.15	1601.17	1530.19	1887.94	2766.32	2028.68	1529.01
2612.57	1591.69	1326.6	1492.77	2933.31	2617.76	1653.26
2064.8	1374.35	1438.9	1432.17	2070.43	1829.17	2005.25
2751.49	919.923	1582.43	1334.35	1865.21	1852.66	1810.75
2177.67	2037.42	1870.09	1396.73	1699.59	2306.29	1699.74
2569.16	2432.58	1444.91	1760.71	2545.95	1669.92	1551.36
2052.17	1837.47	1694.13	2260.78	1576.67	2574.75	1507.56
1458.62	2213.66	1169.26	2133.19	2338.66	2079.93	1673.1
1944.04	1696.8	1646.09	2420.26	1702.69	2235.51	2034.75
1519.39	942.052	2058.06	1864.55	2198.52	2172.98	1777.32
2097.16	1872.25	1408.88	1810.33	1530.53	2543.02	1840.61
2027.7	2278.47	1943.36	1756.1	2297.69	1644.3	1461.08
2300.01	1857.23	2263.45	2549.27	1553.6	3176.95	1754.44
1489.4	2042.16	1643.69	1822.02	3647.79	2540.28	1569.59
1584.91	1649.38	1790.22	2136.74	1360.43	2189.14	2241.77
2183.19	2059.55	1499.56	1636.66	1572.54	1955.16	1724.94
1839.85	1998.7	1918.74	1834.07	1919.27	2025.02	1852.23
2002.44	2542.43	1709.15	1344.28	1598.71	2260.23	1569.24
1776.7	1784.52	1456.32	1637.73	2039.79	2068.34	1540.45
1904.57	2517.14	1668.91	1404.17	1483.36	2079.02	1746.04
2057.69	1635.95	2334.31	1686.64	1591.13	2167.79	1914.08
2063.22	1674.67	1420.89	1386.1	1576.67	2045.77	1834.71
1778.28	2034.26	1623.87	1100.44	1817.01	2544.55	1876.72
2109.79	2240.53	1378.25	1926.93	1986.07	1889.57	1555.65
1899.84	1918.88	1712.75	1686.28	1965.07	2170.54	1576.39
1811.43	2387.53	1596.25	1498.8	1604.9	2466.76	1419.79
1877.73	1617.77	1631.68	1615.05	1153.15	2721.48	1886.73
1959.03	1541.11	1757.19	1113.91	1104.6	2798.05	1644.32
1400.21	2115.66	2500.66	1067.13	3502.48	2484.45	1847.76
1829.59	2411.24	1640.09	1109.66	2950.53	2135.15	1408.88
2263.7	1766.35	1975.79	2044.94	3124.19	1736.73	1219.21
2180.82	2429.42	1772.81	1283.32	2346.58	2506.11	1045.44
1839.06	1873.83	1824.45	1059.33	2180.62	3287.99	1423.72
2393.14	1164.92	2038.25	1247.88	2058.38	2575.05	1889.41
1751.45	2054.81	3092.8	1071.73	2497.74	2050.65	1452.14
2009.55	2447.59	2011.22	1324.78	2797.99	1712.02	1861.88
1516.24	2003.44	1966.78	1208.18	3171.59	1788.9	1240.48
1845.37	2178.89	1530.19	1313.44	3064.85	2076.27	1653.97
1745.92	1663.61	1907.33	1061.46	2050.12	2206.53	2320.96
	2563.77	2641.79	1582.79	2228.13	2538.45	2203.87
	2240.53	3088	1486.39	3086.88	2101.29	2310.05
	3194.44	2267.05	2074.72	3175.03	1833.44	1906.57
	2670.46	2013.02	1679.19	3338.93	1869.74	1569.41
	2391.48	1683.33	2237.39	3321.71	2113.49	2205.3
	2770.04	1663.51	2134.26	2740.84	2072.92	2539.77
	2306.92	1459.32	1503.41	2250.86	1799.88	2116.81
	3516.1	1881.5	1531.76	3214.28	1951.5	2299.86
	2400.18	1898.92	1983.99	2895.78	1548.81	1941.79
	2841.96	1500.16	943.793	3447.39	1539.05	1979.33
	2302.18	1269.55	1517.58	1513.31	1517.7	1942.15
		1655.7	1756.81	2825.2	2199.21	2243.02
		1608.86	2481.58	3416.06	2091.53	1895.31
		1849.08	1671.4	3196.72	1943.57	2319.35
		1177.67	1794.02	3721.82	2057.97	1823.98
		1447.31	1453.08	2576.94	2584.2	1648.97
		1117.61	1723.14	2045.64	2455.47	2366.19
			1765.67	1822.17	2894.46	2156.67
			2109.09	3542.08	2459.43	2256.96
			2161.9	1963	2071.09	1897.99
			1930.47	1551.53	3050.34	1406.56
			2096.69	1615.23	1653.15	1917.48
			2260.07	896.969	2069.86	1831.49
			1663.24	1161.76	3130.88	2012.58
			2284.88	3509.72	2194.64	1467.16
			2026.87	3078.96	3436.56	1600.88
			2694.58	3315.86	1557.66	1669.17
			1619.3	2472.95	1864.86	1812.01
			1097.61	1580.11	1591.52	1675.96
			1124.54	2248.45	1758.09	1541.17
			1486.39	2836.56	2020.14	1611.25
			1232.28	2560.75	1716.3	1050.63
			1344.63	2824.85	1914.89	1168.26
			1407.72	2558.34	2170.54	1580.5
			1570.39	1125.26	2211.41	1332.19
			1240.43	1455.12	1906.65	1471.81
			1549.83	2114.16	1590.91	1331.12
			1093.71	1723.01	2017.39	894.203
			1415.16	1859.02	1586.34	1127.5
			1825.57	1749.52	2463.7	1670.06
			1756.1	1446.51	2142.17	1381.53
			1941.46	1463.04	2901.17	1298.04
			1766.73	1992.27	3021.97	1116.23
			2341.94	1719.91	2110.44
			1718.89	2112.78	2971.33
			1727.39	1686.51	1685.18
			1779.85	1761.57	2335.58
			2280.98	2782.5	2946.93
			1717.12	3242.86	2046.68
			2332.02	3107.89	3597.63
			1962.01	2875.7	1499.39
			1285.44	2523.57	2709.59
			2414.59	1439.28	3138.2
			3142.55	1574.6	1283.71
			2891.63	2202.31	1708.06
			2920.34	3735.94	1982.62
			2370.65	2243.97	1387.74
			1112.85	1723.35	2450.59
			2083.93		3047.9
			2915.02		2637.59
			2414.59		902.687
			3500.86		2835.58
			2973.85		2368.83
					2404.52
					1902.38
					3003.36
					2577.19
					2090.91
					1088.78
					2633.32
					2380.12
					3689.45
					3036.01
					2356.02
					2128.44
					2516.78
					2204.7
					2824.59
					2636.98
					1759.92
					1858.45
					2459.74
					2605.86
					3026.85
					2610.74
					2592.75
					2253.21
