# Supplementary material for: A transcriptomics resource reveals a transcriptional transition during ordered sarcomere morphogenesis in flight muscle
Source: eLife. 2018 May 30;7:e34058. doi: 10.7554/eLife.34058 (PMC6005683; doi:10.7554/eLife.34058)
Supplement: Figure 5—source data 6. [file elife-34058-fig5-data6.xlsx]

## Sheet: Fig5_SD6
Myofibril Diameter from Cross-sections [µm]
30 h APF	48 h APF	60 h APF	72 h APF	80 h APF	90 h APF	1 d adult
0.397	0.438	0.545	0.879	0.997	1.02	1.37
0.396	0.445	0.545	0.886	0.992	1.004	1.388
0.423	0.454	0.535	0.869	0.972	1.018	1.411
0.426	0.467	0.542	0.901	1.075	0.976	1.311
0.416	0.481	0.561	0.887	1.08	0.978	1.357
0.446	0.477	0.543	0.865	1.032	0.984	1.321
0.406	0.49	0.531	0.968	1.071	0.936	1.348
0.414	0.487	0.553	0.939	1.08	0.935	1.338
0.407	0.48	0.522	0.934	1.093	0.896	1.339
0.382	0.477	0.522	0.773	0.934	0.948	1.327
0.398	0.493	0.52	0.771	0.915	0.943	1.386
0.416	0.455	0.511	0.753	0.907	0.899	1.383
0.355	0.432	0.537	0.864	0.912	0.894	1.379
0.346	0.458	0.564	0.849	0.96	0.895	1.412
0.373	0.419	0.546	0.86	0.933	0.931	1.288
0.396	0.411	0.628	0.98	1.141	0.932	1.318
0.336	0.416	0.611	1.012	1.065	0.901	1.337
0.361	0.417	0.628	0.96	1.121	0.93	1.332
0.338	0.414	0.606	1.07	1.126	0.898	1.356
0.342	0.476	0.73	1.082	0.975	0.876	1.366
0.429	0.478	0.754	1.067	0.992	0.934	1.357
0.424	0.465	0.766	1.089	0.977	1.007	1.324
0.415	0.469	0.744	1.061	1.086	1.004	1.338
0.388	0.443	0.746	1.006	1.099	1.035	1.397
0.416	0.438	0.79	1.016	1.08	1.103	1.375
0.42	0.437	0.783	1.003	1.023	1.14	1.31
0.428	0.439	0.708	1.007	0.988	1.107	1.509
0.383	0.441	0.718	1.042	0.991	1.024	1.508
0.414	0.495	0.713	0.996	0.958	1.061	1.472
0.401	0.509	0.709	0.923	0.957	1.025	1.494
0.415	0.506	0.565	0.933	0.98	1.142	1.459
0.398	0.472	0.57	0.957	1.02	1.141	1.475
0.395	0.469	0.562	1.011	1.002	1.148	1.604
0.408	0.478	0.574	1.033	1.032	1.095	1.582
0.418	0.461	0.563	1.025	0.983	1.086	1.567
0.443	0.408	0.57	0.817	0.994	1.084	1.502
0.429	0.395	0.563	0.804	1.006	1.055	1.571
0.42	0.403	0.581	0.806	0.976	1.071	1.583
0.421	0.427	0.6	0.805	0.972	1.091	1.494
0.368	0.415	0.59	0.779	1.001	1.022	1.524
0.373	0.429	0.59	0.831	1.014	1.016	1.553
0.372	0.422	0.617	0.81	1.045	1.018	1.522
0.364	0.418	0.586	0.954	1.02	1.066	1.556
0.388	0.457	0.565	0.933	1.053	1.037	1.409
0.369	0.45	0.579	0.978	1.078	1.052	1.404
0.358	0.455	0.591	0.865	1.07	1.116	1.518
0.356	0.451	0.566	0.907	0.962	1.09	1.46
0.372	0.433	0.531	0.855	0.936	1.123	1.364
0.399	0.444	0.541	0.829	0.929	1.062	1.429
0.365	0.464	0.515	0.83	1.008	1.055	1.501
0.389	0.456	0.566	0.845	0.989	1.087	1.424
0.375	0.477	0.544	0.97	1.019	1.059	1.595
0.365	0.515	0.546	0.983	0.887	1.044	1.568
0.359	0.554	0.54	1.006	0.877	1.029	1.467
0.374	0.52	0.535	1.042	0.898	1.163	1.473
0.396	0.475	0.53	1.069	0.887	1.146	1.482
0.363	0.469	0.536	1.044	0.95	1.127	1.394
0.355	0.467	0.524	0.931	0.959	1.149	1.417
0.372	0.464	0.527	0.919	0.971	1.104	1.314
0.364	0.476	0.528	0.909	0.953	1.127	1.278
0.414	0.515	0.539	0.901	0.968	1.122	1.372
0.416	0.529	0.54	0.844	0.951	1.089	1.246
0.4	0.494	0.543	0.846	1.18	1.143	1.294
0.4	0.529	0.556	0.828	1.166	1.069	1.29
0.433	0.473	0.553	0.769	1.089	1.091	1.296
0.44	0.491	0.541	0.777	1.056	1.068	1.686
0.454	0.483	0.558	0.803	1.089	1.115	1.711
0.395	0.49	0.554	0.776	1.048	1.12	1.658
0.399	0.479	0.562	0.875	1.077	1.137	1.391
0.391	0.47	0.551	0.878	1.047	1.148	1.515
0.402	0.47	0.545	0.89	1.059	1.163	1.459
0.411	0.463	0.55	0.871	0.947	1.124	1.502
0.403	0.456	0.519	0.938	0.941	0.985	1.516
0.412	0.445	0.529	0.982	0.947	1	1.507
0.395	0.498	0.541	0.961	0.939	1.24	1.561
0.378	0.505	0.557	1.039	0.901	1.204	1.603
0.397	0.503	0.544	1.023	0.906	1.192	1.296
0.372	0.421	0.566	1.038	0.932	0.98	1.294
0.391	0.417	0.575	0.867	0.905	0.976	1.326
0.371	0.423	0.552	0.885	0.951	0.973	1.427
0.386	0.418	0.546	0.874	0.955	1.142	1.412
0.395	0.443	0.576	0.929	0.947	1.13	1.45
0.382	0.433	0.585	0.914	0.904	1.155	1.366
0.379	0.433	0.532	0.906	0.88	1.155	1.382
0.381	0.455	0.527	1.008	0.908	1.192	1.404
0.497	0.471	0.542	1.053	0.911	1.137	1.405
0.491	0.45	0.565	1.032	0.887	1.093	1.39
0.466	0.464	0.574	0.908	0.889	1.118	1.418
0.432	0.463	0.566	0.927	0.887	1.125	1.597
0.435	0.475	0.577	0.89	0.823	1.041	1.543
0.433	0.484	0.572	0.938	0.823	1.003	1.63
0.444	0.462	0.56	0.884	0.844	1.029	1.38
	0.457	0.593	0.852	0.832	1.03	1.365
	0.474	0.591	0.884	1.043	1.085	1.341
	0.435	0.567	0.921	1.057	1.063	1.331
	0.446	0.541	0.938	1.033	1.102	1.283
	0.442	0.539	0.893	1.073	1.048	1.309
	0.461	0.56	1.067	1.028	1.088	1.459
	0.447	0.555	1.058	1.032	1.08	1.461
	0.443		1.063	1.011	1.071	1.433
	0.432		1.016	1.078		1.363
	0.411		0.973	1.052		1.383
	0.417		0.981	1.061		1.37
	0.413		1.031			1.406
	0.445		0.977			1.413
	0.431		0.921			1.379
	0.422		0.925			1.47
	0.46		0.909			1.46
	0.442		0.96			1.491
	0.457		0.961
	0.477		0.99
	0.497		1.021
	0.458		1.022
	0.446		1.056
	0.46		0.934
	0.474		0.944
	0.452		0.9
	0.464		0.913
	0.476		0.897
	0.45		0.896
	0.444		1.044
	0.427		1.048
	0.424		1.033
	0.418
	0.445
	0.451
	0.447
	0.45
	0.469
	0.452
	0.452
