# Supplementary material for: A transcriptomics resource reveals a transcriptional transition during ordered sarcomere morphogenesis in flight muscle
Source: eLife. 2018 May 30;7:e34058. doi: 10.7554/eLife.34058 (PMC6005683; doi:10.7554/eLife.34058)
Supplement: Figure 5—source data 7. [file elife-34058-fig5-data7.xlsx]

## Sheet: Fig5_SD7
Twitch events per wildtype fiber per 5 minutes
Single twitch event						Double twitch event
30 h APF	36 h APF	42 h APF	48 h APF	60 h APF	72 h APF	30 h APF	36 h APF	42 h APF	48 h APF	60 h APF	72 h APF
0	1	0	0	0	0	0	0	2	1	0	0
0	1	0	0	0	0	0	0	2	1	0	0
0	0	1	0	1	0	0	0	0	1	0	0
0	0	1	0	0	0	0	0	0	1	0	0
0	0	0	0	0	0	0	0	1	1	0	0
0	1	1	0	0	0	0	0	0	1	0	0
0	0	0	0	1	0	0	0	1	2	0	0
0	2	0	0	0	0	0	0	1	1	0	0
1	1	1	0	0	0	0	0	0	1	0	0
1	1	1	0	0	0	0	0	0	1	0	0
0	1	0	0	1	0	0	0	0	2	0	0
0	1	0	0	1	0	0	0	0	1	0	0
1	1	0	0	1	0	0	0	0	2	0	0
0	2	0	0	0	0	0	0	0	2	0	0
1	1	0	0	0	0	0	0	0	2	0	0
0	1	0	0	1	0	0	0	0	1	0	0
0	1	0	0	0	0	0	0	1	1	0	0
0	0	0	0	0	0	0	0	0	1	0	0
0	1	0	0	0	0	0	0	1	1	0	0
0	1	0	0	0	0	0	0	0	1	0	0
0	1	0	0	0	0	0	0	1	2	0	0
2	0	0	0	1	0	0	0	1	1	0	0
1	0	0	0	1	0	0	0	0	1	0	0
0	0	0	0	1	0	0	0	0	2	0	0
0	2	0	0	0	0	0	0	1	2	0	0
0	2	0	0	0	0	0	0	0	1	0	0
0	0	0	0	0	0	0	0	1	1	0	0
0	0	0	0	0	0	0	0	1	1	0	0
0	1	0	0	0	0	0	0	1	1	0	0
0	0	0	0	1	0	0	0	1	2	0	0
0	2	0	0	0	0	0	0	1	1	0	0
0	2	0		1	0	0	0	1		0	0
0	1	1		0	0	0	0	0		0	0
1	1	0		0	0	0	0	1		0	0
0	1	0		0	0	0	0	1		0	0
0	0	0		1	0	0	0	1		0	0
0	0	0		0	0	0	0	1		0	0
0	0	0		0	0	0	0	1		0	0
0	1	0		1	0	0	0	1		0	0
0	1	0		0	0	0	0	1		0	0
0	2			0	0	0	0			0	0
0	1			0	0	0	0			0	0
0	0			0	0	0	0			0	0
0	0			0	0	0	0			0	0
0	1			0	0	0	0			0	0
0	1			0	0	0	0			0	0
0	1				0	0	0				0
2	0				0	0	0				0
1	1				0	0	0				0
0	1				0	0	0				0
0					0	0					0
					0						0
					0						0
					0						0
					0						0
					0						0
					0						0
					0						0
					0						0
					0						0
					0						0
					0						0
					0						0
					0						0
					0						0
					0						0
					0						0
					0						0
					0						0
					0						0
					0						0
					0						0
					0						0
					0						0
					0						0
					0						0
					0						0
					0						0
					0						0
