# Supplementary material for: A transcriptomics resource reveals a transcriptional transition during ordered sarcomere morphogenesis in flight muscle
Source: eLife. 2018 May 30;7:e34058. doi: 10.7554/eLife.34058 (PMC6005683; doi:10.7554/eLife.34058)
Supplement: Figure 6—source data 1. [file elife-34058-fig6-data1.xlsx]

## Sheet: Sheet1
Fiber/bead fluorescence measurements for quantification of fosmid-GFP expression levels
Mef2Gal4,UASGMAGFP 30 h APF	Mef2Gal4,UASGMAGFP 48 h APF	Mef2Gal4,UASGMAGFP 72 h APF	Mef2Gal4,UASGMAGFP 90 h APF	Mef2Gal4,UASGMAGFP 1d	88F,unc89 30 h APF	88F,unc89 48 h APF	88F,unc89 72 h APF	88F,unc89 90 h APF	88F,unc89 1d	88F,M h APFc 30 h APF	88F,M h APFc 48 h APF	88F,M h APFc 72 h APF	88F,M h APFc 90 h APF	88F,M h APFc 1d	88F,strn 48 h APF	88F,strn 72 h APF	88F,strn 90 h APF	88F,strn 1d	88F,fln 30 h APF	88F,fln 48 h APF	88F,fln 72 h APF	88F,fln 90 h APF	88F,fln 1d
1.00426	0.568005	0.27697	0.260969	0.149257	0.00540882	0.0331069	0.0666348	0.0962171	0.0462108	0.0177211	0.0474169	0.100622	0.250484	0.218696	0.00553828	0.518833	0.364441	0.55241	0.00032559	0.030095	0.11488	0.147676	0.220547
1.12883	0.471209	0.39739	0.359822	0.154903	0.00683907	0.0486922	0.0403025	0.124183	0.0537463	0.0293854	0.0426997	0.116943	0.182462	0.251337	0.0040738	0.625135	0.424241	0.372342	0.00220747	0.0538108	0.115504	0.178229	0.271119
0.66502	0.471751	0.368951	0.459644	0.228623	0.0237619	0.0439688	0.0579274	0.0613251	0.050589	0.0331187	0.0808595	0.162494	0.329343	0.360888	0.00129191	0.301924	0.441492	0.602659	0.00087013	0.0384729	0.144558	0.189609	0.278463
0.874558	0.722961	0.631643	0.461745	0.225451	0.0148447	0.0298679	0.0721274	0.0698823	0.0497549	0.0239855	0.0547038	0.245808	0.177018	0.277726	0.0092526	0.33785	0.454101	0.664607	0.00069225	0.0336967	0.15466	0.217197	0.220245
0.730391	0.466652	0.439948	0.293418	0.220779	0.00678964	0.0409189	0.0806733	0.0922825	0.0690674	0.0297396	0.158558	0.146748	0.204196	0.288659	0.00788121	0.27145	0.757468	0.583637	0.0016853	0.0545374	0.194968	0.211731	0.230217
0.947739	0.739615	0.5681	0.342853	0.290215	0.00443644	0.0411991	0.072048	0.0703247	0.0613621	0.0367413	0.103385	0.147643	0.281646	0.260669	0.00902313	0.2322	0.50834	0.52776	0.00145498	0.0587783	0.178317	0.20971	0.281668
0.898632	0.723823	0.511465	0.345899	0.247162	0.00766312	0.0633856	0.0645215	0.0699835	0.0860311	0.0446723	0.143301	0.146949	0.228905	0.26338	0.0119898	0.340025	0.33501	0.465851	0.00121274	0.0891184	0.193109	0.190129	0.285795
0.596302	0.845683	0.52241	0.373621	0.329921	0.0120807	0.0407976	0.0907522	0.118476	0.084236	0.0331595	0.0645671	0.19118	0.251031	0.306972	0.0194025	0.564521	0.507263	0.358373	0.00162599	0.0494004	0.175816	0.2248	0.261279
0.874661	0.95211	0.568498	0.366286	0.253049	0.00400101	0.0401419	0.113199	0.0828884	0.0831067	0.0390544	0.0822868	0.192756	0.212909	0.315651	0.0198921	0.347099	0.381695	0.491963	0.00064202	0.0509437	0.198314	0.190974	0.215169
0.975684	1.02789	0.52939	0.355401	0.246647	0.00794292	0.0358705	0.0782911	0.0786947	0.0682778	0.0439564	0.0836372	0.127001	0.231634	0.30408	0.0144405	0.232723	0.661008	0.383665	0.00124721	0.0792639	0.188373	0.204269	0.280527
0.818849	0.835515	0.489744	0.410708	0.308847	0.0199888	0.03408	0.0690147	0.0645666	0.0767942	0.0313998	0.0874632	0.133747	0.225335	0.300214	0.0133773	0.272781	0.972585	0.591457	0.00249898	0.0544309	0.201668	0.240563	0.245493
1.02502	1.05196	0.598091	0.41181	0.315486	0.0212227	0.0373979	0.0922784	0.0892118	0.0795908	0.047907	0.0801158	0.288619	0.2453	0.265724	0.0217724	0.249711	0.529564	0.456966	0.00947901	0.102122	0.181118	0.231611	0.239435
0.962387	1.10953	0.615695	0.482963	0.355716	0.0164961	0.0310178	0.0962212	0.102767	0.128054	0.0351283	0.0930525	0.150245	0.319728	0.368663	0.00996359	0.541193	0.578947	0.206917	0.0079521	0.0747847	0.223593	0.245839	0.269313
1.33881	1.10604	0.819635	0.394686	0.352635	0.0184307	0.0460441	0.0953245	0.104558	0.0780591	0.0448274	0.145226	0.194271	0.414513	0.32786	0.0392209	0.289651	0.437705	0.953726	0.0031151	0.0616878	0.241253	0.262487	0.205475
0.57406	1.16484	0.616625	0.360438	0.445301	0.0192582	0.0317739	0.077167	0.0766873	0.130082	0.0350873	0.0889551	0.137378	0.305209	0.343602	0.0196918	0.538564	0.266551	0.589779	0.0020154	0.0567478	0.218768	0.243479	0.242009
1.15503	1.11056	0.484379	0.359437	0.360929	0.0105331	0.0545704	0.072219	0.102082	0.0729979	0.0365766	0.0871194	0.179427	0.215358	0.322961	0.0812703	0.474925	0.308961	0.616106	0.00324733	0.0757795	0.321167	0.243443	0.27322
0.838801	1.04543	0.643816	0.502226	0.395354	0.0070919	0.0733686	0.0827551	0.0927644	0.0889467	0.0408689	0.0698876	0.196934	0.254134	0.35136	0.0267854	0.501919	0.543611	0.626365	0.00847203	0.0712226	0.245118	0.309756	0.349893
1.00252	1.0701	0.698768	0.41572	0.366638	0.00640167	0.0684268	0.0727765	0.0771931	0.117794	0.0486181	0.0874296	0.184835	0.363949	0.430837	0.0239545	0.368934	0.362099	0.673067	0.00458832	0.0857924	0.24395	0.288078	0.308334
0.865231	1.48795	0.658961	0.415188	0.437588	0.0327608	0.091493	0.0993984	0.0764009	0.0965961	0.0419666	0.0759554	0.216784	0.325396	0.348089	0.0181383	0.383999	0.540638	0.93884	0.01685	0.118846	0.269153	0.24915	0.34836
0.952954	1.3315	0.696285	0.475434	0.395887	0.0143105	0.0594942	0.100698	0.0838797	0.0826224	0.0503541	0.105983	0.339197	0.370577	0.320342	0.00201144	0.355457	0.308802	0.517553		0.134737	0.255739	0.238776	0.351671
1.2469	1.54894	0.637161	0.56859	0.526052	0.00875983	0.0520374	0.0846369	0.117793	0.0691385	0.0599229	0.0927793	0.219006	0.351108	0.308389	0.00499163	0.569303	0.656404	0.385757		0.113371	0.27373	0.241983	0.203946
1.30833	1.05643	0.690194	0.410809	0.487418	0.00372388	0.0670042	0.0845914	0.0808043	0.0834425	0.0474661	0.114971	0.225451	0.374305	0.392435	0.00287462	0.404375	0.817385	0.570135		0.0987917	0.307503	0.199211	0.297756
0.823613	1.19877	0.735257	0.653635	0.423389	0.0110742	0.0809394	0.124009	0.0903418	0.0976957	0.0372088	0.0905018	0.176357	0.459363	0.285231	0.00709542	0.589375	0.454955	0.841008		0.132748	0.284768	0.278969	0.285441
1.02857	1.30623	0.716064	0.547092	0.525101	0.0182015	0.0444609	0.0951327	0.0951452	0.0768631	0.0613812	0.101656	0.171747	0.412046	0.304968	0.00336429	0.387552	0.392875	0.308723		0.111694	0.231866	0.325	0.30036
0.88999	1.11983	0.627215	0.619505	0.451303	0.00408326	0.0472129	0.0810446	0.0874733	0.0960963	0.0410619	0.14164	0.21137	0.396228	0.374737	0.0145726	0.510054	0.399064	0.43876		0.0716774	0.288862	0.32595	0.279401
1.23681	1.06059	0.74953	0.675937	0.466323	0.00777334	0.0645511	0.0748885	0.102409	0.130287	0.0422391	0.0942332	0.181208	0.33724	0.344688	0.0132283	0.279988	0.370222	0.482123		0.11274	0.291357	0.230631	0.360307
0.475333	1.37805	0.768797	0.526132	0.428017	0.0142969	0.0871923	0.164291	0.086562	0.0988549	0.0437618	0.0800737	0.202532	0.457239	0.330464	0.0173723	0.543901	0.417325	0.601433		0.105627	0.31696	0.28243	0.208228
0.810368	1.27185	0.813372	0.551548	0.538781	0.0188832	0.0661548	0.10117	0.104258	0.119149	0.0732717	0.109085	0.28044	0.460815	0.412608	0.0238397	0.595777	0.348559	0.318096		0.081106	0.256436	0.264322	0.270016
0.673404	1.45124	0.901329	0.461729		0.0141011	0.096873	0.0940555	0.103885	0.107634	0.045515	0.107361	0.197807	0.418513	0.316796	0.0126137	0.64116	0.446923	0.605532		0.121312	0.359382	0.301538	0.330962
0.743932	0.971594	0.738017	0.695541		0.0108982	0.0428048	0.119888	0.0950942	0.124227	0.0683533	0.112175	0.20603	0.544035	0.368228	0.0150486	1.14223	0.373935	0.676732		0.166572	0.452177	0.27347	0.328245
0.783643	1.44847	0.790555	0.625845		0.0167302	0.0583043	0.11163	0.120826	0.107583	0.0563245	0.0961791	0.203363	0.452478	0.464818	0.028234	0.55541	0.328139	0.75012		0.124791	0.379711	0.310416	0.280824
0.64812		0.891637	0.530775		0.00954616	0.0618944	0.0849254	0.147994	0.120441	0.0573695	0.10255	0.193553	0.48564	0.336837	0.0102919	0.530398	0.473156	0.580028		0.0814681	0.291433	0.365152	0.317597
1.33739		0.85476	0.867307		0.00748184	0.0617663	0.132722	0.1547	0.128925	0.0494406	0.0917395	0.218241	0.463041	0.357255	0.0298778	0.444867	0.565513	0.524365		0.102359	0.360644	0.308543	0.356393
1.09602		1.04954	0.647227		0.00859219	0.0825345	0.103788	0.116651	0.147249	0.0815197	0.134607	0.358262	0.497858	0.358372	0.0203255	0.392103	0.407689	0.389598		0.186102	0.464985	0.303307	0.34168
0.811698		0.999255	0.808042		0.0193773	0.0634319	0.168229	0.0962037		0.0612876	0.136227	0.217568	0.51053	0.397823	0.0797425	0.50308	0.593714	0.479232		0.288377	0.459023	0.292043	0.367499
0.929676		0.723445	0.797297		0.0138882	0.110678	0.137215	0.0952906		0.0582334	0.112437	0.226946	0.558476	0.400806	0.0221089	0.542335	0.688013	0.358442		0.0790066	0.391746	0.296876	0.338446
0.734879		1.03599	1.00379		0.00491036	0.0895358	0.152203	0.0930917		0.0628236	0.135792	0.217176	0.406408	0.385021	0.0153727	0.301774	0.366669	0.529902		0.0747483	0.397382	0.311147	0.346388
1.03939		0.856114	0.77845		0.00288439	0.0853658	0.155928	0.111967		0.0542184	0.121009	0.223327		0.456663	0.0142759	0.359047	0.565144	0.437451		0.203829	0.288576	0.31004	0.376135
1.37121		0.846373	1.07203		0.0135461	0.0874408	0.141099	0.101005		0.0597682	0.11073	0.194605		0.371212	0.0101125	0.262248	0.515073	0.178366		0.162054	0.224681	0.32622	0.314168
0.493921		0.961753	0.6639		0.0274114	0.0819137	0.144271	0.115839		0.0624588	0.12113	0.270929		0.42973	0.0115383	0.258022	0.41266	0.739047		0.0827868	0.326395	0.229469	0.402739
0.6143		0.89517	0.753082		0.00434129	0.0942865	0.152645	0.114855		0.0693513	0.172379	0.215364		0.368698	0.00920601	0.350124	0.777417	0.402025		0.114497	0.288971	0.241884	0.475417
1.03994		0.90353	0.99936		0.0135066	0.11776	0.145891	0.130051		0.0732821	0.141568	0.235955		0.476854	0.0042084	0.375004	0.421597	0.661883		0.105991	0.338396	0.320109
0.883738		0.880751			0.0195463			0.121589		0.0944244	0.111322	0.2714		0.54096	0.00566209	0.255107	0.203912	0.69011		0.158472	0.380696	0.352131
1.10543		0.927701			0.0201244			0.119643			0.122683	0.214855		0.521708	0.0155816	0.229003	0.266834	0.432375		0.104156	0.32551	0.300698
1.20256		0.855602			0.0206104			0.14028			0.119621	0.255173			0.0141771	0.330803	0.608239	0.454204		0.097293	0.453915	0.345162
1.35149		1.04634			0.0141333			0.175815			0.111393	0.406578			0.0201355	0.361991	0.379545	0.556591		0.108142	0.392579	0.289045
0.767908					0.0168967			0.120363			0.154116	0.279283			0.0195855	0.447754	0.536819	0.387775		0.118251	0.390022	0.348266
0.812895					0.0110129			0.127001			0.167342	0.314124			0.0145271	0.29304	0.355859	0.489161		0.178931	0.417804	0.343407
1.2589					0.00749379			0.1303			0.152085	0.312401			0.0133636	0.431299	0.643672	0.672172		0.150194	0.397095	0.371922
1.19382					0.0104492						0.176034	0.222349			0.0224535	0.385379	0.702253	0.841647		0.164099	0.595846	0.385511
1.08127					0.0259743						0.204371	0.260873			0.0113165	0.818475	0.304352	0.442431		0.235809	0.47187	0.295119
1.20056					0.019925						0.126762	0.25871			0.04234	0.352457	0.627746	0.360787		0.251197	0.448879	0.348489
0.556024					0.00668423						0.167514	0.260278			0.0222249	0.336753	0.382756	0.42335		0.238637	0.443512	0.351961
0.996669					0.00306635						0.203368	0.246584			0.0611095	0.324105	0.458197	0.376068		0.215564	0.520673	0.344739
1.22101					0.013098						0.137867	0.286758			0.022331	0.513353	0.409464	0.547377		0.179709	0.527066	0.351563
0.643406					0.0073601						0.193089	0.318282			0.0220664	0.361679	0.332258	0.516523		0.143441	0.427625	0.380982
1.14494					0.00366837							0.290822			0.0115407	0.484749	0.340212	0.694456		0.139596	0.450073	0.354025
1.32246					0.0127037							0.36108			0.0216099	0.322341	0.429127	0.623269		0.269051	0.551833	0.341642
0.837263					0.0169702							0.244892			0.00146945	0.472167	0.400336	0.442903		0.145374	0.414121	0.316086
0.921544					0.016296							0.298499			0.00935913	0.211214	0.418284	0.341344		0.145508	0.42915	0.417341
					0.0139536							0.296477			0.004216	0.444561	0.442348	0.551443		0.15915	0.532212	0.292595
					0.0112524							0.373581			0.010825	0.777416	0.490643	0.43225		0.200902	0.409054	0.397442
					0.0198812							0.247671			0.00966693	0.500355	0.380716	0.538484		0.358068	0.54242	0.40219
					0.0106146							0.300196			0.0229811	0.668675	0.570763	0.390351		0.241649		0.396819
					0.00595782							0.342535			0.0198207	0.63892	0.449978	0.274936		0.169395		0.457348
					0.00556846							0.3066			0.0218998	0.490877	0.576227	0.835235		0.311154
					0.0337621							0.256306			0.0154492	0.451063	0.47428	0.394292		0.236819
					0.011974							0.478482			0.0173462	0.416181	0.466564	0.600662		0.191737
					0.00739959							0.326581			0.0267118	0.474146	0.570218	0.612096		0.367087
					0.00450669							0.355193			0.0190489	0.635764	0.472122	0.388774		0.297778
					0.00960996							0.277359			0.0455921	0.300206	0.258095	0.487854		0.31915
					0.00566338							0.328943			0.0167693	0.349362	0.332412	0.46968		0.273333
					0.00356859							0.321318			0.110287	0.253508	0.692427	0.494411		0.212385
					0.0115024							0.374152			0.0246844	0.189584	0.402104	0.562633		0.490409
					0.0165102							0.364537			0.0206566	0.311096	0.630455	0.734908		0.338408
					0.023377							0.274274			0.014449	0.465664	0.32228	0.661844		0.287573
					0.0256142							0.344266			0.0113663	0.334458	0.407689	0.504653		0.356718
					0.0230588							0.341896			0.00425854	0.18638	0.532674	0.301163		0.347157
					0.0181993							0.365121			0.00243398	0.329577	0.38335	0.533162		0.292383
					0.0127414							0.36202			0.00592869	0.295971	0.396646	0.319734		0.221513
												0.320286			0.00737679	0.265118	0.301958	0.569129		0.37275
												0.363651			0.0119162	0.227436	0.401542	0.730613		0.224164
												0.365006			0.0152832	0.456474	0.419292	0.588265		0.333318
												0.430755			0.0479048	0.633601	0.32517	0.572712		0.330076
												0.361169			0.0237112	0.450771	0.297121	0.596005		0.289216
												0.441557			0.0153877	0.471705	0.460967	0.314111		0.218539
												0.416212			0.0160103	0.48868	0.250707	0.603325		0.331703
												0.370087			0.0256068	0.330156	0.447068	0.456049		0.300198
															0.0100271	0.563338	0.509298	0.546417		0.305274
															0.0459288	0.647658	0.446298	0.40908		0.312016
															0.0286141	0.530312	0.469439	0.160646		0.435829
															0.0878367	0.369546	0.557876	1.0756		0.339029
															0.0260762	0.458412	0.395584	0.421724		0.32795
															0.0158056	0.279929	0.691777	0.376274		0.415953
															0.0125252	0.543759	0.588954	0.608412
																0.871253	0.522119	0.419865
																0.505612	0.556625	0.505616
																0.669292	0.3431	0.518456
																0.490496	0.359496	0.403819
																0.448378	0.262117	0.621868
																0.605939	0.778586	0.711301
																0.518933	0.393399	0.416471
																0.471757	0.559102	0.351186
																0.583916	0.383309	0.323706
																0.314579	0.390406	0.582902
																0.367814	0.585734	0.331255
																0.275313	0.440652	0.380492
																0.189718	0.641046	0.643818
																0.425705	0.464669	0.755844
																0.415229	0.383272	0.574117
																0.223728	0.419097	0.539998
																0.199466	0.414289	0.361041
																0.33941	0.48178	0.527609
																0.314192	0.415137	0.485625
																0.501695	0.333416	0.593949
																0.306603	0.454753	0.436199
																0.438398	0.626422	0.225965
																0.53682	0.525185	0.568181
																0.49936	0.593459	0.412938
																0.334137	0.556353	0.599396
																0.361288	0.413926	0.736162
																0.375074	0.625513	0.389851
																0.679292	0.510464	0.476488
																0.366425	0.597052	0.503227
																0.443074	0.499488	0.377896
																0.536809	0.415123	0.705489
																0.458665	0.162066	0.823001
																0.296035	0.360674	0.43881
																0.613293	0.746835	0.446096
																0.638383	0.421755	0.371481
																0.456897	0.394933
																0.596531	0.29607
																0.369406	0.454853
																0.536799	0.553316
																0.414892	0.366134
																0.486234	0.363636
																0.456986	0.345495
																0.598714	0.429728
																0.316309	0.416341
																0.435513	0.47414
																0.323362
																0.255124
																0.436208
																0.365543
																0.222899
																0.24891
																0.323089
																0.228198
																0.550995
																0.254382
																0.488846
																0.49824
																0.476735
																0.31115
																0.322889
																0.309121
																0.519953
																0.426624
																0.569561
																0.433313
																0.441368
																0.239827
																0.526275
																0.855865
																0.570078
																0.589392
																0.456426
																0.485871
																0.419049
																0.446506
