# Supplementary material for: A transcriptomics resource reveals a transcriptional transition during ordered sarcomere morphogenesis in flight muscle
Source: eLife. 2018 May 30;7:e34058. doi: 10.7554/eLife.34058 (PMC6005683; doi:10.7554/eLife.34058)
Supplement: Figure 6—source data 2. [file elife-34058-fig6-data2.xlsx]

## Sheet: Sheet1
Fiber/bead intensity measurements for salmIR in the background of various fosmid-GFPs
act88func89xw-	act88func89xsalmIR	act88fstrnxw-	act88fstrnxsalmIR	Act88FFlnxw-	Act88FFlnxsalm	Act88FMhcxw-	Act88FMhcxsalmIR
0.070195	0.113933	0.294621	0.172493	0.258813	0.085776	0.227427	0.150393
0.08706	0.077746	0.367631	0.182136	0.319609	0.065578	0.228181	0.163163
0.0778	0.078507	0.295771	0.204707	0.305169	0.07206	0.20248	0.277129
0.07777	0.078815	0.323058	0.1883	0.405797	0.075413	0.590476	0.232792
0.054807	0.143669	0.35011	0.181976	0.29507	0.094322	0.250648	0.255166
0.090753	0.086094	0.417322	0.187178	0.226624	0.120446	0.268895	0.223146
0.092917	0.087004	0.351253	0.19186	0.205817	0.102023	0.207969	0.179325
0.085195	0.083807	0.321386	0.189369	0.332978	0.182617	0.279651	0.274623
0.085336	0.120531	0.378816	0.216004	0.193861	0.11561	0.647864	0.300445
0.099924	0.089288	0.33209	0.224749	0.367124	0.235658	0.249883	0.231414
0.15183	0.102672	0.332561	0.204979	0.35976	0.22413	0.25087	0.240341
0.109725	0.112715	0.350506	0.207519	0.400139	0.31503	0.251792	0.225915
0.128931	0.112956	0.362974	0.203443	0.372092	0.153894	0.304112	0.233812
0.141114	0.089488	0.377263	0.205361	0.489846	0.104891	0.332505	0.286096
0.103154	0.141525	0.368959	0.22257	0.597204	0.138174	0.44287	0.300471
0.104842	0.160876	0.357224	0.213302	0.265643	0.123516	0.313885	0.231495
0.10752	0.101279	0.430564	0.240856	0.242146	0.116705	0.380581	0.293378
0.11001	0.147437	0.401281	0.216895	0.231781	0.11082	0.369996	0.326545
0.160288	0.096648	0.412432	0.260242	0.250527	0.157711	0.40629	0.267231
0.15416	0.098698	0.409136	0.255327	0.230669	0.140335	0.30767	0.396561
0.11928	0.094801	0.448885	0.26093	0.230986	0.212127	0.472963	0.267476
0.161098	0.17447	0.383173	0.227067	0.428486	0.361022	0.313614	0.349245
0.22189	0.116771	0.422425	0.252477	0.24145	0.197852	0.802424	0.256638
0.191839	0.165267	0.402648	0.28439	0.418757	0.199152	0.249939	0.268573
0.146806	0.103261	0.416285	0.25546	0.238915	0.219772	0.395715	0.326738
0.192733	0.123266	0.397831	0.257239	0.443764	0.130429	0.425826	0.242026
0.131984	0.124573	0.402634	0.289262	0.434426	0.14105	0.459384	0.259493
0.169428	0.194761	0.419031	0.325751	0.477822	0.398627	0.491661	0.302562
0.188087	0.20027	0.42407	0.275908	0.445052	0.350173	0.444886	0.244079
0.179026	0.116503	0.433903	0.25554	0.593864	0.244563	0.50761	0.28621
0.147391	0.163503	0.446276	0.258611	0.460061	0.170807	0.427262	0.457099
0.147894	0.117171	0.517409	0.275519	0.326487	0.371566	0.515206	0.307913
0.14332	0.164545	0.476059	0.283762	0.28769	0.246723	0.641226	0.323841
0.169075	0.164545	0.488213	0.307823	0.268261	0.258968	0.487777	0.313837
0.147369	0.12004	0.512921	0.26803	0.500104	0.153237	0.592032	0.312879
0.170941	0.16629	0.512061	0.271782	0.541167	0.203252	0.605551	0.342187
0.174411	0.113167	0.573564	0.301427	0.307815	0.312462	0.329412	0.558638
0.212268	0.113167	0.542958	0.292705	0.325668	0.159372	0.6277	0.561222
0.191234	0.115051	0.576309	0.311491	0.346495	0.266262	0.561773	0.322098
0.254482	0.125379	0.552988	0.303624	0.418099	0.215866	0.530912	0.372377
0.187644	0.124407	0.628873	0.354196	0.603533	0.181594	0.732081	0.542322
0.157512	0.217843	0.646529	0.343806	0.386157	0.316267	0.637254	0.350945
	0.121057	0.639431	0.33991	0.421855	0.257264	0.570288	0.584621
	0.123496	0.697839		0.414773	0.317516	0.805201	0.407563
	0.126629			0.41544	0.260785	0.577219	0.39257
	0.181214				0.227511	0.451925	0.367501
	0.196505				0.330738	0.64283	0.48872
	0.184784				0.321496	0.769236	0.404783
	0.199961				0.213017	0.928001	0.538379
					0.239653		0.45887
					0.230312		0.411016
					0.375925		0.493293
							0.418114
							0.451303
							0.523451
							0.525155
							0.491753
							0.589213
							0.356337
							0.59242
							0.543051
							0.817835
							0.547048
							0.706394
							0.439538
							0.743291
							0.663287
							0.772682
