# Supplementary material for: A transcriptomics resource reveals a transcriptional transition during ordered sarcomere morphogenesis in flight muscle
Source: eLife. 2018 May 30;7:e34058. doi: 10.7554/eLife.34058 (PMC6005683; doi:10.7554/eLife.34058)
Supplement: Figure 7—source data 1. [file elife-34058-fig7-data1.xlsx]

## Sheet: Sheet1
Twitch events per salmIR fiber per 5 minutes
Single Twitch Event				Double Twitch Event
88Fxw-, 48 h APF	88FxsalmIR ,48 h APF	88Fxw-, 72 h APF	88FxsalmIR, 72 h APF	88Fxw-, 48 h APF	88FxsalmIR ,48 h APF	88Fxw-, 72 h APF	88FxsalmIR, 72 h APF
0	0	0	0	1	0	0	1
0	0	0	3	1	0	0	1
1	0	0	2	1	0	0	1
1	0	0	3	1	0	0	0
2	1	0	5	0	0	0	0
2	1	0	6	0	0	0	0
0	0	0	1	1	0	0	0
0	0	0	0	1	0	0	0
1	1	0	0	0	0	0	1
0	1	0	0	1	0	0	1
0	1	0	1	1	0	0	0
2	0	0	2	0	0	0	0
2	1	0	1	0	0	0	0
0	1	0	3	1	0	0	0
	1	0	2		0	0	0
	1	0	3		0	0	0
	1	0	1		0	0	0
	1	0	1		0	0	0
	0	0	2		0	0	0
	1	0	2		0	0	0
	1	0	1		0	0	0
	1	0	1		0	0	0
		0	3			0	0
		0	0			0	0
		0	0			0	0
		0	0			0	0
		0	0			0	0
		0	2			0	0
		0	3			0	0
		0	0			0	0
		0	1			0	0
		0	0			0	0
		0	1			0	0
		0	1			0	0
		0	1			0	0
		0	1			0	0
		0	0			0	0
			0				0
			0				0
			0				0
			3				0
			0				0
			0				0
			0				0
