# Supplementary material for: A transcriptomics resource reveals a transcriptional transition during ordered sarcomere morphogenesis in flight muscle
Source: eLife. 2018 May 30;7:e34058. doi: 10.7554/eLife.34058 (PMC6005683; doi:10.7554/eLife.34058)
Supplement: Figure 7—source data 2. — Note that image analysis is limited by pixel size and thus can result in the same number. [file elife-34058-fig7-data2.xlsx]

## Sheet: Sheet1
Sarcomere Length in Act88F-Gal4 x w- (as control) or Act88F-Gal4 x salmIR [µm]
48h w-	72h w-	90h w-	0d w-	1d w-	48h salm	72h salm	90h salm	0d salm	1d salm
1.771	2.237	2.501	2.834	2.834	1.635	1.518	2.024	2.024	1.119
1.771	2.237	2.501	2.834	2.834	1.635	1.574	2.125	2.125	1.181
1.771	2.362	2.501	2.834	2.834	1.635	1.771	2.125	2.237	1.25
1.771	2.362	2.657	3.036	2.932	1.771	2.024	2.237	2.362	1.25
1.771	2.362	2.657	3.036	2.932	1.771	2.125	2.237	2.362	1.518
1.771	2.362	2.657	3.036	3.036	1.771	2.125	2.237	2.501	2.024
1.771	2.362	2.657	3.149	3.036	1.771	2.125	2.237	2.501	2.024
1.771	2.362	2.657	3.149	3.036	1.771	2.125	2.237	2.501	2.125
1.771	2.362	2.657	3.27	3.036	1.771	2.125	2.237	2.501	2.125
1.809	2.362	2.657	3.27	3.036	1.771	2.125	2.237	2.576	2.125
1.848	2.362	2.657	3.27	3.036	1.771	2.125	2.237	2.657	2.237
1.848	2.362	2.657	3.27	3.036	1.771	2.125	2.237	2.657	2.362
1.932	2.362	2.657	3.27	3.27	1.771	2.125	2.237	2.657	2.362
1.932	2.362	2.834	3.27	3.27	1.771	2.125	2.362	2.657	2.362
1.932	2.362	2.834	3.27	3.27	1.771	2.125	2.362	2.657	2.501
1.932	2.362	2.834	3.27	3.27	1.771	2.125	2.362	2.657	2.501
1.932	2.362	2.834	3.27	3.401	1.771	2.125	2.362	2.657	2.501
1.932	2.362	2.834	3.27	3.401	1.771	2.125	2.362	2.657	2.501
1.932	2.362	2.834	3.27	3.401	1.771	2.125	2.362	2.657	2.657
1.932	2.362	2.834	3.27	3.401	1.771	2.125	2.501	2.657	2.657
1.932	2.501	2.834	3.27	3.401	1.848	2.125	2.501	2.657	2.657
1.932	2.501	2.834	3.27	3.401	1.848	2.237	2.501	2.657	2.657
1.932	2.501	2.834	3.27	3.401	1.848	2.237	2.501	2.657	2.657
1.932	2.501	2.834	3.27	3.401	1.848	2.237	2.501	2.657	2.657
1.932	2.501	2.834	3.27	3.542	1.848	2.237	2.501	2.657	2.657
1.932	2.501	2.834	3.27	3.542	1.932	2.237	2.657	2.657	2.657
1.932	2.501	2.834	3.401	3.542	1.932	2.237	2.657	2.657	2.657
1.932	2.501	2.834	3.401	3.542	1.932	2.237	2.657	2.834	2.834
1.932	2.501	2.834	3.401	3.542	1.932	2.237	2.657	2.834	3.036
1.932	2.501	2.932	3.542	3.542	1.932	2.237	2.657	2.834	3.036
1.932	2.501	3.036	3.542	3.542	1.932	2.237	2.657	2.834	3.036
1.932	2.576	3.036	3.542	3.542	1.932	2.362	2.657	2.834	3.036
1.932	2.576	3.036	3.542	3.542	1.932	2.362	2.657	2.834	3.27
1.932	2.576	3.036	3.542	3.542	1.932	2.362	2.657	2.834	3.27
1.932	2.657	3.036	3.542	3.542	1.932	2.362	2.657	2.834	3.542
1.932	2.657	3.036	3.542	3.542	1.932	2.362	2.657	3.036	3.542
1.932	2.657	3.036	3.542	3.542	1.932	2.362	2.657	3.036
1.932	2.657	3.036	3.542	3.542	1.932	2.362	2.657	3.036
1.932	2.657	3.036	3.542	3.542	1.932	2.362	2.657	3.036
1.932	2.657	3.036	3.542	3.542	1.932	2.362	2.657	3.036
1.932	2.657	3.036	3.542	3.542	1.932	2.362	2.657	3.036
1.932	2.657	3.036	3.542	3.542	1.932	2.362	2.657	3.036
1.932	2.657	3.036	3.542	3.542	1.932	2.362	2.657	3.036
1.932	2.657	3.036	3.542	3.542	1.932	2.362	2.657	3.27
1.932	2.657	3.036	3.542	3.542	1.932	2.362	2.657	3.27
1.932	2.657	3.036	3.542	3.542	1.932	2.501	2.657	3.27
1.932	2.657	3.036	3.542	3.542	1.932	2.501	2.657	3.27
1.932	2.657	3.036	3.542	3.542	1.932	2.501	2.657	3.27
1.932	2.657	3.036	3.542	3.542	2.024	2.501	2.657	3.27
1.932	2.657	3.036	3.542	3.542	2.125	2.501	2.657	3.27
1.932	2.657	3.036	3.542	3.542	2.125	2.501	2.657	3.542
1.932	2.657	3.036	3.542	3.542		2.501	2.657	3.542
1.932	2.657	3.036	3.542	3.542		2.501	2.657	3.542
1.932	2.657	3.036	3.542	3.542		2.501	2.657	3.542
2.125	2.657	3.036	3.542	3.542		2.501	2.657	3.542
	2.657	3.036	3.542			2.501	2.743
	2.657	3.036	3.542			2.501	2.743
	2.657	3.036	3.542			2.501	2.834
	2.657	3.036				2.501	2.834
	2.657	3.036				2.501	2.834
	2.657	3.036				2.501	2.834
	2.657	3.149				2.501	2.834
	2.657	3.149				2.576	2.834
	2.657	3.149				2.576	2.834
	2.657	3.149				2.657	2.834
	2.657	3.149				2.657	2.834
	2.657	3.149				2.657	2.834
	2.657	3.149				2.657	2.834
	2.657	3.149				2.657	2.834
	2.657	3.149				2.657	2.834
	2.743	3.149				2.657	2.834
	2.743	3.149				2.657	2.834
	2.743	3.149				2.657	2.834
	2.834	3.149				2.657	2.834
	2.834	3.27				2.657	2.834
	2.834	3.27				2.657	2.834
	2.834	3.27				2.657	2.834
	2.834	3.27				2.657	2.834
	2.834	3.27				2.657	2.834
	2.834	3.27				2.657	2.834
	2.834	3.27				2.657	3.036
	2.834	3.27				2.657	3.036
	2.834	3.27				2.657	3.036
	2.834	3.27				2.657
	2.834	3.27				2.657
	2.834	3.27				2.657
	2.834	3.27				2.657
	2.834	3.27				2.743
	2.834	3.27
	2.834	3.27
	2.834	3.27
	2.834	3.27
	2.834	3.27
	2.834	3.27
	2.834	3.27
	2.834	3.27
	2.834	3.27
	2.834	3.27
	2.834	3.27
	2.834	3.27
	2.834	3.27
	2.834	3.27
	2.932	3.27
	3.036	3.27
	3.036	3.27
	3.036	3.27
	3.036	3.27
	3.036
	3.036
	3.036
	3.036
	3.036
	3.036
	3.036
	3.036
	3.036
	3.036
