# Supplementary material for: A transcriptomics resource reveals a transcriptional transition during ordered sarcomere morphogenesis in flight muscle
Source: eLife. 2018 May 30;7:e34058. doi: 10.7554/eLife.34058 (PMC6005683; doi:10.7554/eLife.34058)
Supplement: Figure 7—source data 3. — Note that image analysis is limited by pixel size and thus can result in the same number. [file elife-34058-fig7-data3.xlsx]

## Sheet: Sheet1
Myofibril/Sarcomere Width in Act88F-Gal4 x w- (as control) or Act88F-Gal4 x salmIR [µm]
48h w-	72h w-	90h w-	0d w-	1d w-	48h salm	72h salm	90h salm	0d salm	1d salm
0.332	0.415	0.498	0.664	0.996	0.332	0.415	0.415	0.332	0.498
0.415	0.498	0.498	0.664	1.079	0.332	0.415	0.415	0.415	0.581
0.415	0.498	0.498	0.664	1.079	0.332	0.415	0.415	0.498	0.664
0.415	0.498	0.498	0.664	1.079	0.415	0.498	0.415	0.498	0.747
0.415	0.498	0.498	0.747	1.079	0.415	0.498	0.498	0.498	0.747
0.415	0.498	0.498	0.747	1.079	0.415	0.498	0.498	0.498	0.747
0.415	0.498	0.498	0.747	1.079	0.415	0.498	0.498	0.581	0.747
0.415	0.498	0.498	0.747	1.079	0.415	0.498	0.581	0.581	0.747
0.415	0.498	0.581	0.747	1.079	0.415	0.498	0.581	0.581	0.747
0.415	0.498	0.581	0.747	1.079	0.415	0.498	0.581	0.581	0.747
0.415	0.498	0.581	0.747	1.079	0.415	0.498	0.581	0.664	0.747
0.415	0.498	0.581	0.83	1.079	0.415	0.498	0.581	0.664	0.747
0.415	0.498	0.581	0.83	1.162	0.415	0.498	0.581	0.664	0.83
0.415	0.498	0.581	0.83	1.162	0.415	0.498	0.581	0.747	0.83
0.415	0.498	0.581	0.83	1.162	0.415	0.498	0.581	0.747	0.83
0.415	0.581	0.581	0.83	1.162	0.415	0.498	0.581	0.747	0.83
0.415	0.581	0.581	0.83	1.162	0.415	0.498	0.581	0.747	0.83
0.415	0.581	0.664	0.83	1.162	0.415	0.498	0.581	0.747	0.83
0.415	0.581	0.664	0.83	1.162	0.415	0.498	0.581	0.747	0.83
0.415	0.581	0.664	0.83	1.162	0.415	0.498	0.581	0.83	0.83
0.415	0.581	0.664	0.83	1.162	0.415	0.498	0.581	0.83	0.913
0.415	0.581	0.664	0.83	1.162	0.415	0.498	0.581	0.83	0.913
0.415	0.581	0.664	0.83	1.162	0.415	0.498	0.581	0.83	0.913
0.415	0.581	0.664	0.83	1.162	0.415	0.498	0.581	0.83	0.913
0.415	0.581	0.664	0.83	1.162	0.415	0.498	0.581	0.83	0.913
0.415	0.581	0.664	0.913	1.162	0.415	0.498	0.581	0.83	0.913
0.415	0.581	0.664	0.913	1.245	0.415	0.498	0.581	0.83	0.913
0.415	0.581	0.664	0.913	1.245	0.415	0.498	0.581	0.83	0.913
0.415	0.581	0.747	0.913	1.245	0.415	0.498	0.664	0.83	0.913
0.415	0.581	0.747	0.913	1.245	0.415	0.498	0.664	0.83	0.913
0.498	0.581	0.747	0.913	1.245	0.415	0.498	0.664	0.83	0.913
0.498	0.581	0.747	0.913	1.245	0.415	0.581	0.664	0.913	0.913
0.498	0.581	0.747	0.913	1.245	0.415	0.581	0.664	0.913	0.996
0.498	0.581	0.747	0.913		0.415	0.581	0.664	0.913	0.996
0.498	0.581	0.747	0.913		0.498	0.581	0.664	0.913	0.996
0.498	0.581	0.747	0.913		0.498	0.581	0.664	0.913	0.996
0.498	0.581	0.747	0.996		0.498	0.581	0.664	0.913	0.996
0.498	0.581	0.747	0.996		0.498	0.581	0.664	0.913	0.996
0.498	0.581	0.747	0.996		0.498	0.581	0.664	0.913	0.996
0.498	0.581	0.747	0.996		0.498	0.581	0.664	0.913	0.996
0.498	0.581	0.747	0.996		0.498	0.581	0.664	0.913	0.996
0.498	0.581	0.747	0.996		0.498	0.581	0.664	0.913	1.079
0.498	0.581	0.747	0.996		0.498	0.581	0.664	0.913	1.079
0.498	0.581	0.747	0.996		0.498	0.581	0.664	0.913	1.079
0.498	0.581	0.747	0.996		0.498	0.581	0.664	0.913	1.079
0.498	0.581	0.747	0.996		0.498	0.581	0.664	0.913	1.079
0.498	0.581	0.747	0.996		0.498	0.581	0.664	0.996	1.079
0.498	0.581	0.747	0.996		0.498	0.581	0.664	0.996	1.079
0.498	0.581	0.747	0.996		0.498	0.581	0.747	0.996	1.079
0.498	0.581	0.747	0.996		0.498	0.581	0.747	0.996	1.079
0.498	0.581	0.747	0.996		0.498	0.581	0.747	0.996	1.162
0.498	0.581	0.83	0.996		0.498	0.581	0.747	0.996	1.162
0.498	0.581	0.83	1.079			0.581	0.747	0.996	1.162
0.498	0.581	0.83	1.079			0.581	0.747	0.996	1.162
0.498	0.581	0.83	1.079			0.581	0.747	0.996	1.162
	0.581	0.83	1.079			0.581	0.747	0.996	1.162
	0.664	0.83	1.079			0.581	0.747	0.996	1.245
	0.664	0.83	1.162			0.581	0.747	0.996	1.245
	0.664	0.83	1.162			0.581	0.747	1.079	1.245
	0.664	0.83	1.162			0.581	0.747	1.079	1.245
	0.664	0.83	1.162			0.581	0.747	1.162	1.328
	0.664	0.83				0.664	0.747	1.162	1.328
	0.664	0.83				0.664	0.747	1.162	1.328
	0.664	0.83				0.664	0.747	1.162	1.411
	0.664	0.83				0.664	0.747	1.245	1.411
	0.664	0.83				0.664	0.747	1.245	1.411
	0.664	0.83				0.664	0.747	1.245	1.411
	0.664	0.83				0.664	0.747	1.245	1.411
	0.664	0.83				0.664	0.747	1.245	1.411
	0.664	0.83				0.664	0.747	1.245	1.411
	0.664	0.83				0.664	0.747	1.245	1.494
	0.664	0.83				0.664	0.83	1.328	1.578
	0.664	0.83				0.664	0.83	1.328	1.578
	0.664	0.83				0.664	0.83	1.328	1.578
	0.664	0.83				0.664	0.83	1.328	1.578
	0.664	0.83				0.664	0.83	1.411	1.661
	0.664	0.83				0.664	0.83	1.411	1.661
	0.664	0.83				0.664	0.83	1.411	1.661
	0.664	0.83				0.664	0.83	1.411	1.993
	0.664	0.83				0.664	0.83	1.494
	0.664	0.913				0.664	0.83	1.494
	0.664	0.913				0.664	0.83
	0.664	0.913				0.664	0.83
	0.664	0.913				0.664	0.83
	0.664	0.913				0.664	0.83
	0.664	0.913				0.664	0.83
	0.664	0.913				0.664	0.83
	0.664	0.913				0.664	0.83
	0.664	0.913				0.664	0.83
	0.664	0.913				0.664	0.83
	0.664	0.913				0.664	0.83
	0.664	0.913				0.664	0.83
	0.664	0.913				0.664	0.83
	0.664	0.913				0.664	0.83
	0.664	0.913				0.664	0.83
	0.664	0.913				0.664	0.913
	0.664	0.913				0.664	0.913
	0.664	0.913				0.664	0.913
	0.664	0.913				0.747	0.913
	0.664	0.913				0.747	0.913
	0.664	0.913				0.747	0.913
	0.747	0.996				0.747	0.913
	0.747	0.996				0.747	0.913
	0.747	0.996				0.747	0.913
	0.747	0.996				0.747	0.913
	0.747	0.996				0.747	0.913
	0.747	0.996				0.747	0.913
	0.747	0.996				0.747	0.913
	0.747	0.996				0.747	0.913
	0.747	0.996				0.747	0.996
	0.747	0.996				0.747	0.996
	0.747	1.079				0.747	0.996
	0.747	1.079				0.747	0.996
	0.747	1.079				0.83	0.996
	0.747	1.079				0.83	0.996
	0.747	1.079					1.079
	0.747	1.079					1.079
	0.747	1.079					1.079
	0.747
	0.747
	0.747
	0.747
	0.747
	0.747
	0.747
	0.83
	0.83
	0.83
	0.83
	0.83
	0.83
	0.83
	0.83
	0.83
