# Supplementary material for: A transcriptomics resource reveals a transcriptional transition during ordered sarcomere morphogenesis in flight muscle
Source: eLife. 2018 May 30;7:e34058. doi: 10.7554/eLife.34058 (PMC6005683; doi:10.7554/eLife.34058)
Supplement: Figure 8—source data 1. [file elife-34058-fig8-data1.xlsx]

## Sheet: Sheet1
Sarcomeres per myofibril Strn mutant
WT 48h	Strn48h	WT 60h	Strn60h	WT 72h	Strn72h	WT 80h	Strn80h	WT 90h	Strn90h
232.28	245.463	294.684	219.741	240.92	251.196	247.548	261.086	257.949	207.679
225.258	174.993	276.365	208.603	250.061	294.305	282.361	267.933	264.017	245.962
217.457	219.355	284.218	266.101	236.714	246.44	259.011	227.79	267.567	253.254
216.685	247.941	296.862	227.301	244.025	221.237	289.496	244.826	258.063	232.9
215.276	252.961	229.933	233.966	250.679	277.404	258.218	221.5	248.754	222.591
225.605	247.547	273.83	267.028	243.594	309.874	272.482	265.587	240.874	222.151
228.81	262.694	295.985	277.302	239.97	266.005	281.217	224.226	255.607	253.177
224.937	184.727	303.924	213.041	255.694	265.06	306.559	245.933	263.447	226.704
228.495	213.115	329.229	221.859	276.165	270.05	248.713	269.082	267.858	244.132
238.044	243.308	294.124	311.879	274.514	310.371	271.312	242.164	257.899	234.518
222.175	264.695	295.674	245.996	271.115	288.285	242.416	215.847	259.761	235.007
253.802	242.719	273.157	242.797	260.818	280.684	279.009	298.969	269.11	239.647
224.721		281.164	309.486	267.401	318.433	253.329	274.546	252.268	233.756
198.473		336.723	264.174	252.182	313.973	282.441	255.739	246.283	223.434
210.252		251.49	283.408	272.798	273.362	295.207	269.064	283.511	238.021
233.458		214.609	281.915	264.475	306.116	307.797	260.454	264.661	279.903
229.605		303.17	311.405	276.556		276.306	311.603	262.948	307.953
223.395		235.425	264.785	308.772		274.259	259.191	238.16	271.738
213.46		257.664	269.597	288.355		260.183	280.784	238.805	242.679
196.707		295.262	327.276	298.556		287.489	315.936	266.236	283.594
236.712		306.968		272.524		249.833	286.319	237.771	280.676
257.737		295.434		292.827		278.579	246.941	283.148	260.218
226.831		307.797		251.448		257.604		283.486	267.583
256.78		224.249		293.685		276.505		288.32	260.776
237.907		247.458		298.302		247.908		282.192	265.951
256.887		264.969		307.561		262.142		272.89	264.629
251.821		293.919		251.976		251.401		263.404	253.978
246.805		282.126		291.261		281.887		290.343	251.922
238.517		270.362		268.262		253.809		296.663
236.527		234.377		312.737		280.68		302.578
235.145		255.337				258.256		251.923
248.359		250.92				280.189		267.62
249.235		290.87				245.493		251.469
246.547		224.732				279.446		241.966
250.531		227.611				252.494		236.614
256.74		322.264				279.399		267.028
241.424		229.059				246.644		296.161
		293.725				280.329		273.716
		229.286				282.373		301.162
						307.08		318.963
								280.842
								265.492
								286.465
								257.082
								287.851
								254.504
								254.504
								278.11
								243.598
								288.204
