# Supplementary material for: A transcriptomics resource reveals a transcriptional transition during ordered sarcomere morphogenesis in flight muscle
Source: eLife. 2018 May 30;7:e34058. doi: 10.7554/eLife.34058 (PMC6005683; doi:10.7554/eLife.34058)
Supplement: Figure 8—source data 2. [file elife-34058-fig8-data2.xlsx]

## Sheet: Sheet1
Myofiber length Strn mutant
WT 48h	Strn48h	WT 60h	Strn60h	WT 72h	Strn72h	WT 80h	Strn80h	WT 90h	Strn90h
477.382	498.24	704.619	553.814	680.841	722.414	723.782	863.411	755.652	648.517
462.951	355.201	660.817	525.743	706.673	846.391	825.569	886.053	773.43	768.063
446.918	445.246	679.592	670.655	668.953	708.738	757.299	753.302	783.83	790.833
445.332	503.271	709.827	572.867	689.614	636.255	846.43	809.639	755.989	727.275
442.435	513.46	549.792	589.664	708.419	797.786	754.981	732.501	728.716	695.084
463.663	502.47	654.754	672.99	688.397	891.167	796.686	878.297	705.632	693.709
470.251	533.216	707.729	698.885	678.156	765.004	822.226	741.516	748.792	790.593
462.291	374.958	726.713	536.926	722.591	762.286	896.319	813.299	771.759	707.926
469.602	432.581	787.219	559.152	780.441	776.637	727.189	889.855	784.68	762.35
489.228	493.866	703.279	786.028	775.777	892.596	793.265	800.835	755.506	732.327
456.614	537.279	706.986	619.984	766.172	829.08	708.777	713.807	760.963	733.854
521.613	492.67	653.144	611.92	737.071	807.219	815.768	988.691	788.349	748.344
461.846		672.291	779.998	755.675	915.782	740.686	907.923	739.012	729.949
407.901		805.138	665.798	712.667	902.955	825.803	845.728	721.479	697.716
432.109		601.338	714.273	770.927	786.161	863.13	889.795	830.536	743.266
479.803		513.15	710.51	747.406	880.359	899.939	861.321	775.316	874.05
471.885		724.908	784.834	781.548		807.866	1030.47	770.297	961.643
459.122		562.924	667.337	872.591		801.88	857.146	697.683	848.555
438.704		616.101	679.465	814.892		760.725	928.554	699.571	757.812
404.273		706.001	824.835	843.72		840.564	1044.8	779.93	885.576
486.491		733.99		770.153		730.464	946.857	696.544	876.464
529.701		706.412		827.53		814.513	816.633	829.472	812.579
466.182		735.972		710.593		753.185		830.464	835.578
527.735		536.201		829.953		808.448		844.625	814.322
488.947		591.695		843.001		724.837		826.672	830.483
527.955		633.568		869.168		766.452		799.424	826.354
517.542		702.79		712.083		735.05		771.633	793.094
507.234		674.591		823.103		824.184		850.551	786.675
490.201		646.462		758.109		742.088		869.064
486.111		560.419		883.796		820.656		886.394
483.271		610.535				755.092		737.999
510.428		599.974				819.219		783.985
512.228		695.499				717.776		736.669
506.703		537.357				817.047		708.831
514.891		544.24				738.244		693.152
527.651		770.564				816.911		782.251
496.174		547.703				721.141		867.593
		702.326				819.628		801.843
		548.245				825.604		882.246
						897.844		934.393
								822.718
								777.75
								839.189
								753.115
								843.251
								745.56
								745.56
								814.714
								713.613
								844.284
