# Supplementary material for: A transcriptomics resource reveals a transcriptional transition during ordered sarcomere morphogenesis in flight muscle
Source: eLife. 2018 May 30;7:e34058. doi: 10.7554/eLife.34058 (PMC6005683; doi:10.7554/eLife.34058)
Supplement: Figure 8—source data 4. — Note that image analysis is limited by pixel size and thus can result in the same number. [file elife-34058-fig8-data4.xlsx]

## Sheet: Sheet1
Sarcomere length for Strn mutant
48 h APFStrnMiMIC [µm]	60 h APFStrnMiMIC	72 h APFStrnMiMIC	80 h APFStrnMiMIC	90 h APFStrnMiMIC	1 d adult StrnMiMIC
2.074	2.501	2.237	3.036	2.657	1.518
2.024	2.298	2.298	3.149	2.657	2.024
1.977	2.237	2.298	3.149	2.657	2.18
2.024	2.18	2.298	3.149	2.932	2.18
2.024	2.576	2.362	3.27	2.932	2.237
2.125	2.501	2.362	3.27	2.932	2.237
2.125	2.932	2.362	3.27	3.036	2.237
2.024	2.932	2.429	3.27	3.036	2.429
1.977	2.18	3.036	3.27	3.036	2.576
1.977	2.237	3.036	3.27	3.036	2.576
1.977	2.501	3.036	3.27	3.149	2.743
	2.501	3.149	3.27	3.149	2.834
	2.743	3.149	3.27	3.149
	2.743	3.149	3.401	3.149
	2.743	3.149	3.401	3.149
		3.149	3.401	3.149
		3.149	3.401	3.149
		3.149	3.542	3.27
		3.27	3.542	3.27
		3.401	3.542	3.27
		3.401		3.27
		3.401		3.27
				3.401
				3.401
				3.542
				3.542
