# Supplementary material for: A transcriptomics resource reveals a transcriptional transition during ordered sarcomere morphogenesis in flight muscle
Source: eLife. 2018 May 30;7:e34058. doi: 10.7554/eLife.34058 (PMC6005683; doi:10.7554/eLife.34058)
Supplement: Supplementary file 2. — This table includes multiple tabs containing the GO-Elite analysis of enrichments in Mfuzz clusters as well as genes up- or down-regulated from 30–72 hr APF and between wild-type and salmIR IFM. It also contains a complete list of all genes included in the ‘User Defined’ gene sets. [file elife-34058-supp2.xlsx]

## Sheet: IFM72vs30APF down
Sample Gene Set	Ontology Type	Ontology Name(Ontology-ID)	Number Changed	Number Measured	Number in Ontology	Percent Changed	Percent Present	Z Score	PermuteP	AdjustedP	gene symbols
72vs30h APF log2FC<-2	biological_process	rRNA metabolic process(GO:0016072)	19	35	37	54.2857	94.5946	9.35689	0	0.0610621	CG10909|CG11837|CG12301|CG1542|CG1671|CG4038|CG5033|CG5728|CG8545|CG8939|CG9799|Fib|NHP2|Nop60B|Rrp40|U3-55K|brat|nop5|wcd
72vs30h APF log2FC<-2	cellular_component	chaperonin-containing T-complex(GO:0005832)	7	8	8	87.5	100	7.74617	0	0.0610621	CG5525|CG7033|CG8258|Cct5|Cctgamma|T-cp1|Tcp-1eta
72vs30h APF log2FC<-2	cellular_component	nucleolus(GO:0005730)	22	59	64	37.2881	92.1875	7.59476	0	0.0610621	CG12909|CG1542|CG5033|CG5728|CG6712|CG8545|CG8939|Fib|HP6|NHP2|Nlp|Nop56|Nop60B|Nopp140|hoip|l(1)1Bi|mod|nop5|ns1|ph-d|sle|wcd
72vs30h APF log2FC<-2	biological_process	antibacterial humoral response(GO:0019731)	12	26	28	46.1538	92.8571	6.6125	0	0.0610621	AttA|AttB|AttC|AttD|CecA1|CecA2|CecB|CecC|Def|IM3|TepI|TepII
72vs30h APF log2FC<-2	biological_process	defense response to Gram-positive bacterium(GO:0050830)	13	36	40	36.1111	90	5.67883	0	0.0610621	AttA|AttB|AttC|AttD|CG13551|CG6639|CecA1|CecA2|CecB|CecC|Def|PGRP-SA|PGRP-SD
72vs30h APF log2FC<-2	cellular_component	cytoskeletal part(GO:0044430)	81	511	538	15.8513	94.9814	5.5222	0	0.0610621	Apc|Arp53D|Arp8|CG12288|CG15100|CG18190|CG2852|CG32232|CG5525|CG6053|CG7033|CG8036|CG8258|CG8778|CG9135|Cct5|Cctgamma|CycB|Cyp1|Dhc36C|Dhc98D|Eb1|FK506-bp1|Hel25E|Hsp23|Hsp26|Hsp27|Hsp68|Hsp70Bbb|Hsp70Bc|Klp61F|Klp67A|Lam|LamC|Map205|PGRP-SB1|SAK|Sep4|Sep5|Spindly|T-cp1|Tcp-1eta|Yp3|alphaTub84B|alphaTub85E|ana1|ana2|asp|aur|betaTub56D|betaTub60D|blow|borr|cdc2|cmet|d|dgt3|dgt5|dgt6|f|fabp|feo|fut…
72vs30h APF log2FC<-2	biological_process	regulation of chromatin binding(GO:0035561)	3	3	3	100	100	5.4978	0.0016	0.199527	CycA|CycB|CycB3
72vs30h APF log2FC<-2	molecular_function	gamma-butyrobetaine dioxygenase activity(GO:0008336)	3	3	4	100	75	5.4978	0.0006	0.1398	CG10814|CG4335|CG5321
72vs30h APF log2FC<-2	biological_process	cell differentiation(GO:0030154)	98	676	697	14.497	96.9871	5.13533	0	0.0610621	Aats-val|Adgf-A|B-H1|B-H2|BubR1|CG10341|CG10418|CG11180|CG11417|CG11837|CG12301|CG12325|CG12499|CG13073|CG13333|CG13900|CG14210|CG14230|CG14840|CG15100|CG1671|CG1785|CG2260|CG2875|CG34330|CG3817|CG4038|CG42554|CG4554|CG4593|CG5033|CG5290|CG5525|CG7033|CG7056|CG7246|CG7993|CG9246|Cct5|CycA|Doc1|Fen1|HLHmdelta|HP6|Hsp68|JhI-1|Klp61F|LSm7|Mat89Ba|Nop56|Nop60B|Nopp140|Nup50|Oat|Oseg4|Pabp2|Psf1|Rbm13…
72vs30h APF log2FC<-2	cellular_component	Yb body(GO:0070725)	4	6	6	66.6667	100	4.92683	0.0006	0.1398	SoYb|armi|piwi|vret
72vs30h APF log2FC<-2	molecular_function	snoRNA binding(GO:0030515)	4	6	6	66.6667	100	4.92683	0.0012	0.180081	CG10341|CG4038|NHP2|U3-55K
72vs30h APF log2FC<-2	biological_process	spindle organization(GO:0007051)	40	216	220	18.5185	98.1818	4.91826	0	0.0610621	BubR1|CG13900|CG5525|CG7033|CG8258|Cct5|Cctgamma|Cks30A|CycB3|Eb1|Hel25E|Klp61F|Klp67A|SAK|SmB|Spc105R|T-cp1|Tcp-1eta|alphaTub84B|alphaTub85E|ana1|ana2|asp|barr|borr|cmet|dgt3|dgt5|dgt6|grp|mei-38|mtsh|mud|polo|pont|spd-2|sub|thr|tum|twe
72vs30h APF log2FC<-2	cellular_component	small nuclear ribonucleoprotein complex(GO:0030532)	17	64	66	26.5625	96.9697	4.90886	0	0.0610621	CG10418|CG10909|CG11920|CG13900|CG17266|CG4038|CG4849|Fib|LSm3|LSm7|Nop56|SmB|SmD1|U3-55K|U4-U6-60K|hoip|wcd
72vs30h APF log2FC<-2	cellular_component	small-subunit processome(GO:0032040)	3	4	4	75	100	4.60391	0.0016	0.199527	CG12301|CG1671|CG9799
72vs30h APF log2FC<-2	cellular_component	nucleolar part(GO:0044452)	5	10	10	50	100	4.52214	0.0008	0.144555	CG4038|Fib|RpI1|RpI135|Tif-IA
72vs30h APF log2FC<-2	biological_process	ovarian fusome organization(GO:0030723)	5	10	10	50	100	4.52214	0.001	0.160982	Btk29A|Src64B|asp|cuff|nclb
72vs30h APF log2FC<-2	biological_process	ribosome biogenesis(GO:0042254)	8	22	22	36.3636	100	4.47759	0	0.0610621	CG10341|CG32409|CG4038|CG5033|Nop60B|RpLP0-like|Tif-IA|hoip
72vs30h APF log2FC<-2	cellular_component	basal cortex(GO:0045180)	4	7	7	57.1429	100	4.44247	0.0022	0.2563	brat|mira|mud|pon
72vs30h APF log2FC<-2	cellular_component	condensed chromosome outer kinetochore(GO:0000940)	4	7	8	57.1429	87.5	4.44247	0.0018	0.218318	BubR1|Spc105R|cmet|polo
72vs30h APF log2FC<-2	biological_process	syncytial blastoderm mitotic cell cycle(GO:0035186)	6	14	15	42.8571	93.3333	4.41868	0.0008	0.144555	BubR1|Cks30A|CycA|CycB|CycB3|ph-d
72vs30h APF log2FC<-2	biological_process	regulation of sister chromatid segregation(GO:0033045)	6	14	14	42.8571	100	4.41868	0.001	0.160982	BubR1|Cks30A|CycA|ald|alphaTub84B|alphaTub85E
72vs30h APF log2FC<-2	biological_process	apical constriction(GO:0003383)	5	11	11	45.4545	100	4.21686	0.0012	0.180081	m|mey|neo|nyo|tyn
72vs30h APF log2FC<-2	biological_process	pseudouridine synthesis(GO:0001522)	5	11	12	45.4545	91.6667	4.21686	0.0016	0.199527	CG10341|CG3045|CG4038|NHP2|Nop60B
72vs30h APF log2FC<-2	cellular_component	vacuolar proton-transporting V-type ATPase, V0 domain(GO:0000220)	6	15	16	40	93.75	4.18766	0.0008	0.144555	Vha100-3|Vha16-3|Vha16-4|Vha16-5|VhaAC39-2|VhaPPA1-2
72vs30h APF log2FC<-2	biological_process	asymmetric stem cell division(GO:0098722)	12	45	47	26.6667	95.7447	4.1367	0.0002	0.0610621	CycA|InR|ana2|asp|brat|cdc2|mira|mud|piwi|pon|sna|wcd
72vs30h APF log2FC<-2	biological_process	nuclear envelope organization(GO:0006998)	3	5	6	60	83.3333	3.97714	0.0046	0.376099	Lam|LamC|twe
72vs30h APF log2FC<-2	cellular_component	small nucleolar ribonucleoprotein complex(GO:0005732)	3	5	5	60	100	3.97714	0.0046	0.376099	CG4038|Fib|NHP2
72vs30h APF log2FC<-2	cellular_component	cyclin-dependent protein kinase holoenzyme complex(GO:0000307)	3	5	5	60	100	3.97714	0.0048	0.376099	CycA|CycB|Cyp1
72vs30h APF log2FC<-2	biological_process	mitotic cytokinesis(GO:0000281)	3	5	5	60	100	3.97714	0.0054	0.399429	CycB|CycB3|sti
72vs30h APF log2FC<-2	biological_process	cytoplasmic microtubule organization(GO:0031122)	6	16	16	37.5	100	3.97606	0.0026	0.28827	CG5525|CG7033|CG8036|CG8258|Tcp-1eta|spd-2
72vs30h APF log2FC<-2	biological_process	negative regulation of metaphase/anaphase transition of cell cycle(GO:1902100)	5	12	12	41.6667	100	3.94654	0.0028	0.28827	BubR1|CycA|ald|alphaTub84B|alphaTub85E
72vs30h APF log2FC<-2	biological_process	negative regulation of chromosome segregation(GO:0051985)	5	12	12	41.6667	100	3.94654	0.0028	0.28827	BubR1|CycA|ald|alphaTub84B|alphaTub85E
72vs30h APF log2FC<-2	biological_process	protein polymerization(GO:0051258)	7	21	21	33.3333	100	3.88945	0.001	0.160982	Klp67A|alphaTub84B|alphaTub85E|betaTub56D|betaTub60D|chic|tsr
72vs30h APF log2FC<-2	biological_process	reproductive structure development(GO:0048608)	13	56	58	23.2143	96.5517	3.71337	0.0002	0.0610621	AP-2|Btk29A|SmB|Sox100B|Wnt4|aop|hh|nclb|rib|salr|thr|tsr|wb
72vs30h APF log2FC<-2	biological_process	positive regulation of smoothened signaling pathway(GO:0045880)	4	9	9	44.4444	100	3.70815	0.0048	0.376099	Sulf1|hh|ihog|shf
72vs30h APF log2FC<-2	biological_process	microtubule anchoring(GO:0034453)	4	9	9	44.4444	100	3.70815	0.004	0.361388	CycB|Klp67A|ana2|mud
72vs30h APF log2FC<-2	biological_process	microtubule organizing center organization(GO:0031023)	22	118	125	18.6441	94.4	3.66493	0	0.0610621	CG7033|Fib|Klp61F|Klp67A|Lam|Map205|Poc1|Rcd2|SAK|alphaTub85E|ana1|ana2|armi|asp|aur|betaTub56D|feo|grp|polo|spd-2|thr|tum
72vs30h APF log2FC<-2	biological_process	regulation of synaptic activity(GO:0060025)	3	6	6	50	100	3.50213	0.0118	0.541333	Dg|GluRIIA|rt
72vs30h APF log2FC<-2	biological_process	regulation of transposition(GO:0010528)	3	6	6	50	100	3.50213	0.0112	0.534051	SoYb|piwi|vret
72vs30h APF log2FC<-2	biological_process	organelle assembly(GO:0070925)	21	116	122	18.1034	95.082	3.42904	0.0014	0.196756	CG7006|CG7735|Cks30A|Eb1|Klp67A|LSm3|Oseg4|Rcd2|SAK|Spc105R|ana1|ana2|fzo|grp|mtsh|mud|polo|pont|rempA|twe|unc
72vs30h APF log2FC<-2	molecular_function	N-acetylmuramoyl-L-alanine amidase activity(GO:0008745)	4	10	13	40	76.9231	3.41835	0.0084	0.450749	PGRP-SA|PGRP-SB1|PGRP-SC2|PGRP-SD
72vs30h APF log2FC<-2	molecular_function	serine-type endopeptidase activity(GO:0004252)	34	220	283	15.4545	77.7385	3.36134	0.0008	0.144555	CG11192|CG11842|CG13744|CG16710|CG18557|CG18563|CG18636|CG18735|CG18754|CG30083|CG30091|CG30286|CG30287|CG3117|CG31728|CG32755|CG33225|CG3355|CG34409|CG3650|CG42694|CG43110|CG43335|CG43336|CG4386|CG4613|CG4650|CG4914|CG5909|CG6639|CG7142|CG9733|mas|stet
72vs30h APF log2FC<-2	biological_process	spindle assembly checkpoint(GO:0071173)	4	11	11	36.3636	100	3.16439	0.0122	0.545549	BubR1|ald|alphaTub84B|alphaTub85E
72vs30h APF log2FC<-2	molecular_function	peptidoglycan binding(GO:0042834)	4	11	14	36.3636	78.5714	3.16439	0.0114	0.534051	PGRP-SA|PGRP-SB1|PGRP-SC2|PGRP-SD
72vs30h APF log2FC<-2	cellular_component	nuclear speck(GO:0016607)	4	11	13	36.3636	84.6154	3.16439	0.0112	0.534051	B52|CG3927|CG4021|sug
72vs30h APF log2FC<-2	biological_process	peptidoglycan metabolic process(GO:0000270)	4	11	14	36.3636	78.5714	3.16439	0.0114	0.534051	PGRP-SA|PGRP-SB1|PGRP-SC2|PGRP-SD
72vs30h APF log2FC<-2	biological_process	non-sensory hair organization(GO:0035316)	6	21	22	28.5714	95.4545	3.12734	0.0046	0.376099	f|flr|in|sha|sn|vri
72vs30h APF log2FC<-2	biological_process	proximal/distal pattern formation, imaginal disc(GO:0007449)	6	21	21	28.5714	100	3.12734	0.0078	0.4427	B-H1|B-H2|al|dac|hh|jing
72vs30h APF log2FC<-2	biological_process	sensory organ boundary specification(GO:0008052)	3	7	7	42.8571	100	3.12338	0.0162	0.639672	B-H1|B-H2|amos
72vs30h APF log2FC<-2	biological_process	female meiotic division(GO:0007143)	6	22	24	27.2727	91.6667	2.98834	0.0116	0.534929	Cks30A|HP6|ald|ball|mei-38|polo
72vs30h APF log2FC<-2	cellular_component	extracellular space(GO:0005615)	29	192	306	15.1042	62.7451	2.96463	0.0044	0.376099	Adgf-A|AttA|AttB|AttC|CCHa2|CG11630|CG11852|CG17843|CG2852|CG30280|CG30281|CG42490|CG8102|CG8642|CecA1|CecA2|CecB|CecC|Def|ImpL2|Obp56i|PPYR1|Spn1|TepI|TepII|TotB|TotZ|ltl|olf413
72vs30h APF log2FC<-2	cellular_component	INO80-type complex(GO:0097346)	3	8	8	37.5	100	2.81037	0.028	0.829137	Arp8|pont|rept
72vs30h APF log2FC<-2	molecular_function	arginine N-methyltransferase activity(GO:0016273)	3	8	10	37.5	80	2.81037	0.0264	0.800499	Art1|Art3|Art4
72vs30h APF log2FC<-2	biological_process	regulation of mitochondrion organization(GO:0010821)	3	8	8	37.5	100	2.81037	0.0294	0.847907	Pgam5-2|Spargel|mtsh
72vs30h APF log2FC<-2	biological_process	regulation of mitotic cell cycle, embryonic(GO:0009794)	3	8	8	37.5	100	2.81037	0.0282	0.832276	CycA|grp|twe
72vs30h APF log2FC<-2	biological_process	imaginal disc eversion(GO:0007561)	3	8	8	37.5	100	2.81037	0.0266	0.801076	ImpE1|ImpE2|ImpE3
72vs30h APF log2FC<-2	cellular_component	cytoplasmic exosome (RNase complex)(GO:0000177)	3	8	8	37.5	100	2.81037	0.0294	0.847907	Rrp4|Rrp45|Rrp46
72vs30h APF log2FC<-2	biological_process	G2/M transition of mitotic cell cycle(GO:0000086)	3	8	8	37.5	100	2.81037	0.0258	0.790426	CycA|CycB|cdc2
72vs30h APF log2FC<-2	biological_process	autophagic cell death(GO:0048102)	13	70	71	18.5714	98.5915	2.79463	0.006	0.399429	Akap200|CG14995|CG5254|CG7860|CecA1|CecB|Cyp1|Dcp-1|Ect3|Eig71Ej|Eip63F-1|Eip71CD|Obp99b
72vs30h APF log2FC<-2	molecular_function	cyclin-dependent protein serine/threonine kinase regulator activity(GO:0016538)	5	18	19	27.7778	94.7368	2.77734	0.0148	0.606663	Cks30A|CycA|CycB|CycB3|Cyp1
72vs30h APF log2FC<-2	biological_process	regulation of cellular response to growth factor stimulus(GO:0090287)	4	13	13	30.7692	100	2.73623	0.0216	0.710953	CG10459|Sulf1|nst|tld
72vs30h APF log2FC<-2	biological_process	ovarian nurse cell to oocyte transport(GO:0007300)	4	13	13	30.7692	100	2.73623	0.0186	0.686185	Btk29A|Dcp-1|Src64B|chic
72vs30h APF log2FC<-2	cellular_component	nuclear exosome (RNase complex)(GO:0000176)	4	13	13	30.7692	100	2.73623	0.0212	0.70832	Rrp4|Rrp40|Rrp45|Rrp46
72vs30h APF log2FC<-2	biological_process	ATP hydrolysis coupled proton transport(GO:0015991)	8	37	39	21.6216	94.8718	2.67689	0.0112	0.534051	CG15719|CG5421|Vha100-3|Vha16-3|Vha16-4|Vha16-5|VhaAC39-2|VhaPPA1-2
72vs30h APF log2FC<-2	biological_process	Notch signaling pathway(GO:0007219)	9	44	46	20.4545	95.6522	2.6495	0.0116	0.534929	HLHmdelta|HLHmgamma|Nle|Ocho|Tom|m6|malpha|rumi|spdo
72vs30h APF log2FC<-2	biological_process	response to fungus(GO:0009620)	7	31	35	22.5806	88.5714	2.63609	0.0144	0.595783	CecA1|CecA2|CecB|CecC|GNBP3|Hsp27|Spn1
72vs30h APF log2FC<-2	biological_process	establishment of spindle localization(GO:0051293)	5	19	19	26.3158	100	2.63105	0.0196	0.696941	Eb1|ana2|asp|aur|mud
72vs30h APF log2FC<-2	biological_process	RNA interference(GO:0016246)	5	19	20	26.3158	95	2.63105	0.0208	0.70832	CG17265|armi|hdc|piwi|trsn
72vs30h APF log2FC<-2	biological_process	cuticle pattern formation(GO:0035017)	6	25	26	24	96.1538	2.61446	0.0182	0.686185	Apc|f|ihog|m|sha|sn
72vs30h APF log2FC<-2	biological_process	antennal morphogenesis(GO:0048800)	4	14	14	28.5714	100	2.55256	0.0274	0.819593	al|f|sha|sn
72vs30h APF log2FC<-2	molecular_function	3'-5'-exoribonuclease activity(GO:0000175)	4	14	15	28.5714	93.3333	2.55256	0.0252	0.777424	Rrp4|Rrp40|Rrp45|Rrp46
72vs30h APF log2FC<-2	molecular_function	pseudouridine synthase activity(GO:0009982)	3	9	10	33.3333	90	2.54471	0.0408	1	CG3045|CG4038|Nop60B
72vs30h APF log2FC<-2	molecular_function	beta-catenin binding(GO:0008013)	3	9	9	33.3333	100	2.54471	0.037	0.966366	Apc|CadN|pont
72vs30h APF log2FC<-2	biological_process	adult walking behavior(GO:0007628)	3	9	9	33.3333	100	2.54471	0.0354	0.944071	mbm|oc|sim
72vs30h APF log2FC<-2	biological_process	ganglion mother cell fate determination(GO:0007402)	3	9	9	33.3333	100	2.54471	0.041	1	brat|hb|mira
72vs30h APF log2FC<-2	biological_process	sensory perception of mechanical stimulus(GO:0050954)	6	26	26	23.0769	100	2.50195	0.0208	0.70832	Eb1|ana1|f|rempA|salr|unc
72vs30h APF log2FC<-2	biological_process	nucleoside phosphate catabolic process(GO:1901292)	9	46	50	19.5652	92	2.4984	0.0186	0.686185	CG30103|CG8525|NT5E-2|Rala|alphaTub84B|alphaTub85E|betaTub56D|betaTub60D|fzo
72vs30h APF log2FC<-2	biological_process	cytokinetic process(GO:0032506)	5	21	25	23.8095	84	2.36523	0.0304	0.862697	chic|feo|fwd|sti|tsr
72vs30h APF log2FC<-2	molecular_function	secondary active organic cation transmembrane transporter activity(GO:0008513)	5	21	24	23.8095	87.5	2.36523	0.0304	0.862697	CG10486|CG4459|CG5592|CG7442|CG7458
72vs30h APF log2FC<-2	molecular_function	RNA methyltransferase activity(GO:0008173)	5	21	24	23.8095	87.5	2.36523	0.0266	0.801076	CG11837|CG14544|CG3808|CG8939|Nsun2
72vs30h APF log2FC<-2	biological_process	regulation of reactive oxygen species metabolic process(GO:2000377)	3	10	10	30	100	2.31456	0.0448	1	InR|SelD|Sesn
72vs30h APF log2FC<-2	biological_process	spindle stabilization(GO:0043146)	3	10	12	30	83.3333	2.31456	0.0456	1	Klp61F|feo|fwd
72vs30h APF log2FC<-2	biological_process	spermatogenesis(GO:0007283)	13	79	96	16.4557	82.2917	2.31153	0.022	0.71217	ACXC|Imp|Pkd2|Samuel|cdc2|chic|comr|fwd|fzo|mael|mtsh|twe|unc
72vs30h APF log2FC<-2	molecular_function	hydrogen-exporting ATPase activity(GO:0036442)	10	56	58	17.8571	96.5517	2.31083	0.0202	0.70692	CG15719|CG31477|CG5421|T-cp1|Vha100-3|Vha16-3|Vha16-4|Vha16-5|VhaAC39-2|VhaPPA1-2
72vs30h APF log2FC<-2	biological_process	protein peptidyl-prolyl isomerization(GO:0000413)	6	28	29	21.4286	96.5517	2.29194	0.0314	0.879796	CG17266|CG2852|Cyp1|FK506-bp1|FK506-bp2|shu
72vs30h APF log2FC<-2	molecular_function	cyclin-dependent protein kinase activity(GO:0097472)	4	16	16	25	100	2.23029	0.0428	1	CG7236|Cks30A|Eip63E|cdc2
72vs30h APF log2FC<-2	biological_process	meiosis I(GO:0007127)	4	16	18	25	88.8889	2.23029	0.0474	1	Cks30A|ald|cdc2|fzy
72vs30h APF log2FC<-2	cellular_component	kinetochore(GO:0000776)	6	29	31	20.6897	93.5484	2.1936	0.0378	0.967287	BubR1|Klp67A|Spindly|cmet|fzy|polo
72vs30h APF log2FC<-2	biological_process	protein folding(GO:0006457)	18	123	127	14.6341	96.8504	2.18155	0.0324	0.899278	CG11267|CG15863|CG17266|CG2852|CG5525|CG6693|CG7033|CG8258|Cct5|Cctgamma|Cyp1|FK506-bp1|FK506-bp2|Hsp27|Hsp68|T-cp1|Tcp-1eta|shu
72vs30h APF log2FC<-2	biological_process	tRNA metabolic process(GO:0006399)	12	74	78	16.2162	94.8718	2.16449	0.0346	0.939388	Aats-ala|Aats-gly|Aats-val|CG10909|CG14544|CG15100|CG17259|CG2263|Fib|JhI-1|Tgt|l(1)G0045
72vs30h APF log2FC<-2	biological_process	embryo development ending in birth or egg hatching(GO:0009792)	9	51	55	17.6471	92.7273	2.15222	0.0274	0.819593	CycB|Doc1|Eip63E|InR|dm|grp|laf|oc|wbl
72vs30h APF log2FC<-2	biological_process	karyosome formation(GO:0030717)	5	23	24	21.7391	95.8333	2.12874	0.0496	1	Btk29A|Src64B|ball|chic|cuff
72vs30h APF log2FC<-2	biological_process	regulation of gene silencing(GO:0060968)	7	37	38	18.9189	97.3684	2.10228	0.0368	0.966366	CG8036|Samuel|cd|jim|mael|vig2|vret
72vs30h APF log2FC<-2	UserSuppliedAssociations	Mfuzz Cluster19	119	287	287	41.4634	100	19.3683	0	0.000507692	Aats-ala|Aats-val|Arp8|Art3|Brf|CG10082|CG10286|CG10576|CG11417|CG11837|CG12134|CG12301|CG12499|CG13185|CG13333|CG1354|CG13575|CG1360|CG13900|CG14230|CG14544|CG1542|CG15517|CG1671|CG17259|CG1785|CG1806|CG18178|CG30349|CG32409|CG3335|CG3368|CG3808|CG3817|CG4038|CG42268|CG43658|CG4554|CG4593|CG5114|CG5290|CG5525|CG5589|CG6227|CG6712|CG6891|CG7006|CG7033|CG7246|CG7519|CG7845|CG7993|CG8258|CG8545|CG8…
72vs30h APF log2FC<-2	UserSuppliedAssociations	Mfuzz Cluster34	96	223	223	43.0493	100	17.863	0	0.000507692	Apc|C901|CG10864|CG10924|CG10959|CG11160|CG11658|CG12159|CG12836|CG13073|CG13081|CG13744|CG13842|CG14210|CG14286|CG14395|CG14590|CG15093|CG15100|CG17124|CG17322|CG17746|CG18673|CG2260|CG2709|CG2794|CG30460|CG31038|CG31548|CG31559|CG32333|CG32425|CG32507|CG3513|CG42346|CG42663|CG42748|CG43740|CG4386|CG4613|CG4674|CG4860|CG5728|CG6023|CG6767|CG7322|CG7458|CG7737|CG8031|CG8398|CG8420|CG9194|CG9522|C…
72vs30h APF log2FC<-2	UserSuppliedAssociations	Mfuzz Cluster17	133	530	530	25.0943	100	13.1583	0	0.000507692	Best3|CG10752|CG10801|CG10909|CG11269|CG12078|CG12438|CG12448|CG12535|CG12661|CG12674|CG12684|CG12923|CG13131|CG13202|CG13244|CG13463|CG13481|CG13526|CG13540|CG13829|CG13898|CG13970|CG14087|CG14151|CG1421|CG1428|CG14383|CG14456|CG14551|CG14731|CG14743|CG14931|CG14983|CG15233|CG15719|CG15734|CG15876|CG16904|CG17173|CG17195|CG17207|CG17580|CG17650|CG17744|CG18193|CG2053|CG30048|CG30065|CG30184|CG30…
72vs30h APF log2FC<-2	UserSuppliedAssociations	WTvssalm_1d adult_log2FC<-2	176	842	842	20.9026	100	12.4106	0	0.000507692	Ama|AttA|AttB|AttC|AttD|B-H2|CCHa2|CG10621|CG10793|CG10801|CG11370|CG11459|CG11835|CG11920|CG12592|CG12684|CG1273|CG12866|CG13023|CG13053|CG13081|CG13137|CG13244|CG13358|CG13526|CG13597|CG13905|CG14205|CG14840|CG15083|CG15263|CG15719|CG15734|CG15905|CG16710|CG16965|CG17108|CG17173|CG17181|CG17322|CG17562|CG17738|CG18193|CG18446|CG1850|CG18563|CG18636|CG18649|CG18735|CG2861|CG30385|CG30401|CG30429…
72vs30h APF log2FC<-2	UserSuppliedAssociations	Mfuzz Cluster15	50	194	194	25.7732	100	8.18811	0	0.000507692	AttD|CCHa2|CG10621|CG10814|CG11370|CG11376|CG11459|CG11920|CG12288|CG12643|CG14118|CG17219|CG18446|CG18557|CG30083|CG30287|CG31337|CG31606|CG34213|CG34296|CG34330|CG4269|CG43335|CG43336|CG6385|CG6639|CG6660|CG7224|CG7442|CG7860|CG8791|Cyp309a2|FBgn0264748|FBgn0267113|Jhe|Oat|Obp99b|PGRP-SD|Pdfr|Ptth|Sema-1a|Spn1|Spn88Eb|Tango2|Tif-IA|Tsp42Ep|fabp|kon|neur|nimC2
72vs30h APF log2FC<-2	UserSuppliedAssociations	WTvssalm_72hAPF_log2FC<-2	104	583	583	17.8388	100	7.57938	0	0.000507692	AlkB|CG10752|CG10801|CG10909|CG11842|CG12078|CG12592|CG12684|CG13022|CG13056|CG13305|CG13526|CG13829|CG1421|CG14915|CG14983|CG15023|CG15083|CG15478|CG15719|CG17018|CG17195|CG17322|CG17744|CG17843|CG18193|CG18545|CG18649|CG30429|CG30447|CG31337|CG31525|CG31606|CG31807|CG32055|CG32232|CG32588|CG32720|CG3347|CG34021|CG34029|CG34213|CG34247|CG42694|CG42763|CG42853|CG43059|CG43060|CG43062|CG43069|CG43…
72vs30h APF log2FC<-2	UserSuppliedAssociations	Mfuzz Cluster8	50	233	233	21.4592	100	6.6701	0	0.000507692	B-H2|CG10341|CG10418|CG11839|CG12325|CG13096|CG13296|CG17266|CG18563|CG1943|CG2617|CG2875|CG31728|CG34409|CG43116|CG43366|CG4785|CG5033|CG6693|CG6962|CG7056|CG7173|CR43481|Dg|FBgn0266581|Hel25E|InR|IntS10|LBR|Lam|Nop56|Nup50|Nup75|Sirt6|Spargel|Src64B|T-cp1|U4-U6-60K|aft|cd|chic|eg|jim|jing|mdy|mira|mtSSB|pont|rept|tex
72vs30h APF log2FC<-2	UserSuppliedAssociations	Mfuzz Cluster32	107	703	703	15.2205	100	5.87449	0	0.000507692	ACXC|Arp53D|CG10104|CG10459|CG10486|CG10748|CG1077|CG10793|CG10931|CG11060|CG11423|CG11630|CG11698|CG12309|CG12682|CG12698|CG12857|CG12914|CG12985|CG13455|CG13471|CG13597|CG13801|CG13871|CG14070|CG14113|CG14190|CG14834|CG14839|CG14841|CG15208|CG15333|CG15498|CG15909|CG17118|CG17258|CG17329|CG18605|CG2861|CG2871|CG30037|CG30103|CG30268|CG30271|CG30393|CG31068|CG31088|CG31279|CG31320|CG31327|CG3139…
72vs30h APF log2FC<-2	UserSuppliedAssociations	microtubule_associated	80	512	519	15.625	98.6513	5.30056	0	0.000507692	Apc|CG12288|CG15100|CG15395|CG18190|CG2852|CG31907|CG32232|CG5525|CG6053|CG7033|CG8036|CG8258|CG8778|CG9135|Cct5|Cctgamma|CycB|Cyp1|Dhc36C|Dhc98D|Eb1|FBgn0266111|FBgn0266521|FK506-bp1|Hel25E|Hsp23|Hsp26|Hsp27|Hsp68|Hsp70Bbb|Hsp70Bc|Klp61F|Klp67A|Lam|Map205|PGRP-SB1|SAK|Sep5|Spindly|T-cp1|Tcp-1eta|Yp3|ald|alphaTub84B|alphaTub85E|ana1|ana2|asp|aur|betaTub56D|betaTub60D|borr|cdc2|cmet|dgt3|dgt5|dgt6…
72vs30h APF log2FC<-2	UserSuppliedAssociations	Mfuzz Cluster40	50	293	293	17.0648	100	4.84439	0	0.000507692	B52|CG11030|CG11180|CG1143|CG11438|CG11966|CG12880|CG12909|CG12948|CG14949|CG16710|CG17211|CG17265|CG17994|CG18754|CG2852|CG30403|CG32164|CG4069|CG43759|CG4849|CG6163|CG8945|CG9253|FBgn0265011|FBgn0265298|FK506-bp1|Hsp27|Imp|ImpL2|Kdm2|LRP1|Nle|Nlp|Nop60B|Pabp2|Psf1|Rrp45|SmB|SmD1|Sulf1|Uhg2|dm|dnk|lox|mab-21|nyo|p130CAS|r-l|wbl
72vs30h APF log2FC<-2	UserSuppliedAssociations	Mfuzz Cluster2	46	270	270	17.037	100	4.63007	0	0.000507692	AP-2|Adgf-A|CG13137|CG13474|CG14958|CG15056|CG15071|CG17018|CG18545|CG18649|CG31668|CG3251|CG3347|CG33552|CG42658|CG43098|CG43230|CG5592|CR41443|CR42836|CR43159|CR43264|CR43431|CR43475|CR43625|FBgn0265039|FBgn0265063|FBgn0265382|FBgn0265958|FBgn0266004|FBgn0266595|FBgn0266957|FBgn0266978|FBgn0267123|FBgn0267159|FBgn0267537|FBgn0267604|Osi5|Vha16-4|bnb|comr|fd102C|fd96Ca|piwi|psd|sug
72vs30h APF log2FC<-2	UserSuppliedAssociations	Mfuzz Cluster12	51	317	317	16.0883	100	4.42986	0	0.000507692	CG11816|CG13053|CG13056|CG13905|CG15169|CG15478|CG17374|CG17562|CG17803|CG18636|CG30091|CG30383|CG31157|CG31525|CG32055|CG32182|CG32588|CG32971|CG3355|CG34163|CG34238|CG34247|CG42694|CG42792|CG42876|CG43059|CG43060|CG43076|CG4335|CG4650|CG5171|CG5322|CG7763|CG9989|CR43280|CR43620|CREG|FBgn0267112|FBgn0267153|FBgn0267674|Ir54a|Lcp4|Mur89F|Rpb11|TepI|TotB|TotZ|cuff|lmd|nerfin-1|sim
72vs30h APF log2FC<-2	UserSuppliedAssociations	Mfuzz Cluster33	46	283	283	16.2544	100	4.27847	0	0.000507692	CBP|CG1273|CG15387|CG15400|CG18788|CG30385|CG3045|CG31551|CG32639|CG33116|CG4382|CG6234|CG8478|CG8771|CG8800|CG9123|CR43878|Cht3|FBgn0266101|FBgn0266111|Klp67A|Nrt|Pli|Poc1|RAF2|SAK|SoYb|Wnt4|ana1|ana2|aur|barr|bora|cmet|dac|klu|mud|pod1|rempA|sle|stet|sub|thr|tnc|vimar|vret
72vs30h APF log2FC<-2	UserSuppliedAssociations	WTvssalm_30hAPF_log2FC>2	57	398	398	14.3216	100	3.73128	0	0.000507692	CG10924|CG10959|CG11160|CG11267|CG11340|CG11417|CG11658|CG12836|CG14210|CG14590|CG14949|CG15093|CG1542|CG31038|CG31548|CG32333|CG33331|CG4038|CG43729|CG43740|CG5924|CG6023|CG6767|CG7322|CG8398|CG8778|CG9143|CdGAPr|Eb1|FBgn0265077|FBgn0266456|FBgn0267486|Fen1|Fib|Hr38|Hsp26|ImpL2|ImpL3|NHP2|Nop60B|Past1|RpLP0-like|Rrp4|Sclp|Sucb|Uhg2|bbg|dnk|hoip|l(1)G0020|l(3)72Dn|mira|nclb|nop5|nst|r-l|tinc

## Sheet: IFM72vs30APF up
Sample Gene Set	Ontology Type	Ontology Name(Ontology-ID)	Number Changed	Number Measured	Number in Ontology	Percent Changed	Percent Present	Z Score	PermuteP	AdjustedP	gene symbols
72vs30h APF log2FC>2	cellular_component	mitochondrial membrane part(GO:0044455)	77	127	133	60.6299	95.4887	16.8029	0	0.00403371	ATPsyn-Cf6|ATPsyn-b|ATPsyn-beta|ATPsyn-d|ATPsyn-gamma|CG10219|CG10320|CG11455|CG12203|CG12400|CG12859|CG14482|CG1746|CG1970|CG31229|CG3192|CG3214|CG32230|CG3321|CG34172|CG34439|CG3446|CG3621|CG3683|CG3731|CG4169|CG4692|CG4769|CG5548|CG5703|CG6020|CG6455|CG6463|CG7394|CG7506|CG7580|CG7598|CG7712|CG8680|CG9140|CG9172|CG9306|CoIV|CoVIII|CoVIIc|CoVIb|CoVa|CoVb|ND23|ND42|ND75|Oscp|Pdsw|RFeSP|SdhA|SdhB…
72vs30h APF log2FC>2	biological_process	generation of precursor metabolites and energy(GO:0006091)	72	118	123	61.0169	95.935	16.3185	0	0.00403371	Ald|CG10219|CG10320|CG11455|CG12203|CG12400|CG12859|CG14482|CG1970|CG3192|CG3214|CG32230|CG32649|CG3446|CG3621|CG3683|CG3731|CG4169|CG4769|CG5548|CG5703|CG6020|CG6463|CG7580|CG7598|CG7712|CG7766|CG8475|CG9140|CG9172|CG9306|CG9485|CoIV|CoVIII|CoVIIc|CoVa|CoVb|Cyt-c-p|Eno|Gapdh1|Gapdh2|Gdh|GlyP|Hex-A|ND23|ND42|ND75|Pdsw|Pfk|Pgi|Pgk|Pglym78|Pgm|PhKgamma|RFeSP|SdhA|SdhB|SdhC|Ucrh|cype|l(1)G0334|l(2)3…
72vs30h APF log2FC>2	cellular_component	oxidoreductase complex(GO:1990204)	55	93	106	59.1398	87.7358	13.9126	0	0.00403371	CG10219|CG10320|CG11455|CG11876|CG12203|CG12400|CG12859|CG14482|CG1970|CG3192|CG3214|CG32230|CG34439|CG3446|CG3621|CG3683|CG3731|CG4169|CG4769|CG5214|CG5261|CG5548|CG5703|CG6020|CG6415|CG6463|CG7430|CG7580|CG7598|CG7712|CG8680|CG9140|CG9172|CG9306|Gpdh|Gpo-1|ND23|ND42|ND75|Nc73EF|Pdsw|RFeSP|SdhA|SdhB|SdhC|Ucrh|l(1)G0334|l(2)35Di|l(3)neo18|mt:Cyt-b|mt:ND1|mt:ND3|mt:ND4|mt:ND4L|ox
72vs30h APF log2FC>2	molecular_function	monovalent inorganic cation transmembrane transporter activity(GO:0015077)	94	229	261	41.048	87.7395	13.5144	0	0.00403371	ATPsyn-Cf6|ATPsyn-b|ATPsyn-beta|ATPsyn-d|ATPsyn-gamma|Atpalpha|CG10804|CG13794|CG14482|CG15096|CG15279|CG16700|CG1698|CG1732|CG1746|CG2003|CG32669|CG3321|CG34172|CG3476|CG3731|CG4169|CG42235|CG42376|CG43066|CG43155|CG4692|CG5549|CG6293|CG6723|CG7580|CG7708|CG8083|CG8925|CG9657|CoIV|CoVIII|CoVIIc|CoVIb|CoVa|CoVb|Eaat1|Hk|Ih|Irk2|Irk3|KCNQ|List|NaCP60E|Nckx30C|Nha1|Oscp|Picot|RFeSP|Rh50|SerT|Sh|Sha…
72vs30h APF log2FC>2	molecular_function	structural constituent of cuticle(GO:0042302)	60	112	145	53.5714	77.2414	13.4704	0	0.00403371	Acp1|Acp65Aa|CG10625|CG1136|CG15515|CG34461|CG34462|CG7548|CG8927|Ccp84Aa|Ccp84Ab|Ccp84Ac|Ccp84Ad|Ccp84Ae|Ccp84Af|Ccp84Ag|Cpr100A|Cpr30B|Cpr30F|Cpr47Ea|Cpr47Ef|Cpr49Aa|Cpr49Ab|Cpr49Ae|Cpr49Ag|Cpr50Cb|Cpr51A|Cpr62Bb|Cpr62Bc|Cpr64Aa|Cpr64Ab|Cpr64Ac|Cpr64Ad|Cpr65Au|Cpr65Av|Cpr65Ea|Cpr65Ec|Cpr66Cb|Cpr66D|Cpr67B|Cpr72Ec|Cpr76Ba|Cpr76Bb|Cpr76Bd|Cpr92A|Cpr92F|Cpr97Eb|Cry|Lcp1|Lcp65Ac|Lcp65Ag1|Lcp65Ag2|T…
72vs30h APF log2FC>2	molecular_function	NADH dehydrogenase activity(GO:0003954)	31	41	44	75.6098	93.1818	12.4446	0	0.00403371	CG10320|CG11455|CG12203|CG12400|CG12859|CG1970|CG3192|CG3214|CG32230|CG3446|CG3621|CG3683|CG5548|CG5703|CG6020|CG6463|CG7712|CG8680|CG9140|CG9172|CG9306|ND23|ND42|ND75|Pdsw|l(2)35Di|l(3)neo18|mt:ND1|mt:ND3|mt:ND4|mt:ND4L
72vs30h APF log2FC>2	molecular_function	oxidoreductase activity, acting on NAD(P)H, quinone or similar compound as acceptor(GO:0016655)	27	36	38	75	94.7368	11.5461	0	0.00403371	CG10320|CG12203|CG12400|CG12859|CG1970|CG3192|CG3214|CG3621|CG3683|CG5548|CG5703|CG6020|CG6463|CG7712|CG8680|CG9140|CG9172|CG9306|ND23|ND42|ND75|Pdsw|l(3)neo18|mt:ND1|mt:ND3|mt:ND4|mt:ND4L
72vs30h APF log2FC>2	biological_process	ion transport(GO:0006811)	102	339	384	30.0885	88.2812	10.2589	0	0.00403371	ATPsyn-Cf6|ATPsyn-b|ATPsyn-beta|ATPsyn-d|ATPsyn-gamma|Atpalpha|CG10006|CG12531|CG13248|CG16700|CG1746|CG31760|CG3321|CG3476|CG4301|CG43155|CG4692|CG4991|CG5130|CG5535|CG7589|CG7708|CG7888|CG8785|CG9065|CG9090|CG9297|CG9413|Ca-P60A|Ca-alpha1D|Ca-alpha1T|Ca-beta|ClC-a|Cng|Eaat1|Efr|GluRIIE|Grd|Hk|Ih|Irk2|Irk3|KCNQ|KaiRIA|NaCP60E|Nckx30C|Nha1|Nmdar1|Nmdar2|Oatp33Eb|Oatp58Db|Oatp74D|Oscp|Picot|Presti…
72vs30h APF log2FC>2	cellular_component	contractile fiber part(GO:0044449)	21	30	33	70	90.9091	9.69831	0	0.00403371	Actn|Ald|Chd64|Gapdh1|Gpdh|Mf|Mhc|Mlc1|Mlc2|Mlp84B|Pgk|Pglym78|Tm1|Tm2|Tpi|Zasp66|bt|fln|sls|up|wupA
72vs30h APF log2FC>2	cellular_component	cytochrome complex(GO:0070069)	20	29	31	68.9655	93.5484	9.36424	0	0.00403371	CG14482|CG3731|CG4169|CG4769|CG7580|CoIV|CoVIII|CoVIIc|CoVIb|CoVa|CoVb|RFeSP|Ucrh|cype|levy|mt:CoI|mt:CoII|mt:CoIII|mt:Cyt-b|ox
72vs30h APF log2FC>2	molecular_function	voltage-gated cation channel activity(GO:0022843)	21	33	34	63.6364	97.0588	9.05359	0	0.00403371	CG43155|Ca-alpha1D|Ca-alpha1T|Ca-beta|Hk|Ih|Irk2|Irk3|KCNQ|NaCP60E|Sh|Shab|Shal|eag|elk|na|para|stj|tipE|trp|trpl
72vs30h APF log2FC>2	molecular_function	electron carrier activity(GO:0009055)	54	152	172	35.5263	88.3721	8.8695	0	0.00403371	CG1275|CG1319|CG14482|CG3214|CG34172|CG42376|CG4769|CG8993|CoIV|CoVIII|CoVIIc|CoVIb|CoVa|CoVb|Cyp12a5|Cyp12b2|Cyp12e1|Cyp18a1|Cyp28c1|Cyp28d1|Cyp301a1|Cyp305a1|Cyp313b1|Cyp318a1|Cyp4aa1|Cyp4c3|Cyp4d20|Cyp4e1|Cyp4e2|Cyp4g15|Cyp4p1|Cyp4s3|Cyp6a14|Cyp6a17|Cyp6a20|Cyp6a21|Cyp6a23|Cyp6a9|Cyp6g1|Cyp6w1|Cyp9f2|Cyt-b5-r|Cyt-c-p|ND23|ND75|SdhB|SdhC|cype|levy|mt:CoI|mt:CoII|mt:CoIII|mt:Cyt-b|su(r)
72vs30h APF log2FC>2	biological_process	transmembrane transport(GO:0055085)	109	426	473	25.5869	90.0634	8.64889	0	0.00403371	ABCB7|ATPsyn-Cf6|ATPsyn-b|ATPsyn-beta|ATPsyn-d|ATPsyn-gamma|Aph-4|CG10006|CG1208|CG12531|CG12858|CG13248|CG1358|CG14160|CG14196|CG14439|CG14511|CG15096|CG15890|CG16700|CG1746|CG17664|CG1824|CG2003|CG30345|CG31100|CG31103|CG31106|CG31272|CG31760|CG32669|CG3321|CG33281|CG3476|CG4019|CG42235|CG42269|CG43155|CG4462|CG4991|CG5130|CG5535|CG6126|CG6293|CG6484|CG6723|CG7084|CG7342|CG7394|CG7708|CG7777|CG…
72vs30h APF log2FC>2	cellular_component	cation channel complex(GO:0034703)	16	23	24	69.5652	95.8333	8.42498	0	0.00403371	Ca-alpha1D|Ca-alpha1T|Ca-beta|Cng|Hk|KCNQ|NaCP60E|Sh|Shab|Shal|eag|elk|para|qvr|stj|trp
72vs30h APF log2FC>2	molecular_function	metal ion transmembrane transporter activity(GO:0046873)	59	187	216	31.5508	86.5741	8.1773	0	0.00403371	Atpalpha|CG10006|CG10804|CG13794|CG15096|CG15279|CG16700|CG1698|CG1732|CG2003|CG32669|CG42235|CG4301|CG43066|CG43155|CG5130|CG5549|CG6293|CG6723|CG7708|CG8083|CG9657|Ca-P60A|Ca-alpha1D|Ca-alpha1T|Ca-beta|Eaat1|Hk|Ih|Irk2|Irk3|KCNQ|List|NaCP60E|Nckx30C|Nha1|Picot|Rya-r44F|SerT|Sh|Shab|Shal|VGAT|VhaAC45|dmGlut|eag|elk|ine|mfrn|na|nompC|nrv1|para|ppk12|salt|stj|tipE|trp|trpl
72vs30h APF log2FC>2	cellular_component	respiratory chain(GO:0070469)	13	17	17	76.4706	100	8.1123	0	0.00403371	CG12400|CG34172|Cyt-c-p|ND42|ND75|RFeSP|mt:CoI|mt:CoII|mt:Cyt-b|mt:ND1|mt:ND3|mtacp1|ox
72vs30h APF log2FC>2	cellular_component	mitochondrion(GO:0005739)	72	254	269	28.3465	94.4238	7.9813	0	0.00403371	ATPsyn-beta|ATPsyn-d|Acon|Adk2|Alas|CG10320|CG10340|CG1041|CG11876|CG12859|CG16935|CG1970|CG3192|CG32649|CG3731|CG4169|CG42376|CG5028|CG5548|CG5703|CG6439|CG6455|CG7433|CG8745|CG8993|Cchl|CoIV|CoVIb|CoVa|CoVb|Cyp12a5|Cyp12b2|Cyp12e1|Cyp301a1|Cyt-b5-r|Cyt-c-p|EF-G2|Gdh|Gpo-1|Hsc70-1|Las|Mdh2|Men-b|ND23|ND42|ND75|Oscp|Pdsw|Pink1|RFeSP|SdhA|blw|isoQC|kdn|l(1)G0156|l(1)G0230|l(1)G0255|l(1)G0334|mRpL5…
72vs30h APF log2FC>2	molecular_function	chitin binding(GO:0008061)	33	83	104	39.759	79.8077	7.71528	0	0.00403371	CG12009|CG13308|CG13309|CG13643|CG13676|CG14125|CG14300|CG14301|CG14304|CG14607|CG14880|CG31077|CG32036|CG33263|CG34324|CG42397|CG42729|CG5210|CG6933|CG8192|Cda4|Cda5|ChLD3|Cht6|Cht7|Gasp|Hml|Muc11A|Peritrophin-A|ckd|obst-E|serp|verm
72vs30h APF log2FC>2	biological_process	chitin metabolic process(GO:0006030)	35	96	117	36.4583	82.0513	7.30934	0	0.00403371	CG12009|CG13308|CG13309|CG13643|CG13676|CG14125|CG14300|CG14301|CG14304|CG14607|CG14880|CG31077|CG32036|CG33263|CG34324|CG42397|CG42729|CG5210|CG6933|CG8192|Cda4|Cda5|ChLD3|Cht6|Cht7|Gasp|Hml|Idgf2|Idgf4|Muc11A|Peritrophin-A|ckd|obst-E|serp|verm
72vs30h APF log2FC>2	biological_process	hydrogen transport(GO:0006818)	26	61	64	42.623	95.3125	7.2929	0	0.00403371	ATPsyn-Cf6|ATPsyn-b|ATPsyn-beta|ATPsyn-d|ATPsyn-gamma|CG1746|CG3321|CG4692|Oscp|T3dh|Vha100-2|Vha100-5|Vha16-1|Vha26|Vha36-1|Vha44|Vha55|Vha68-2|VhaAC45|VhaM9.7-c|VhaSFD|blw|l(1)G0230|l(2)06225|mt:ATPase6|sun
72vs30h APF log2FC>2	biological_process	ATP metabolic process(GO:0046034)	22	47	51	46.8085	92.1569	7.27648	0	0.00403371	ATPsyn-Cf6|ATPsyn-b|ATPsyn-beta|ATPsyn-d|ATPsyn-gamma|Adk1|Atpalpha|CG1746|CG3321|CG4769|CG7598|Ca-P60A|Cyt-c-p|Oscp|Vha55|Vha68-2|blw|l(1)G0230|l(2)06225|mt:ATPase6|nrv1|sun
72vs30h APF log2FC>2	cellular_component	membrane(GO:0016020)	211	1120	1284	18.8393	87.2274	7.23455	0	0.00403371	ABCB7|Ace|Ance-2|Ance-3|Atpalpha|CG10006|CG10186|CG10219|CG10738|CG10830|CG11147|CG11319|CG1208|CG12203|CG12400|CG12484|CG12531|CG12913|CG13248|CG15096|CG1572|CG1732|CG17664|CG1824|CG18317|CG2930|CG2975|CG30158|CG30345|CG31100|CG31103|CG3119|CG31202|CG31272|CG31648|CG3214|CG32669|CG33281|CG3476|CG3621|CG4019|CG42235|CG42322|CG42540|CG4301|CG43066|CG43155|CG43778|CG4928|CG5037|CG5535|CG6126|CG6293…
72vs30h APF log2FC>2	molecular_function	heme binding(GO:0020037)	40	121	138	33.0579	87.6812	7.06575	0	0.00403371	CG10211|CG10219|CG42331|CG4769|CG5873|Cyp12a5|Cyp12b2|Cyp12e1|Cyp18a1|Cyp28c1|Cyp28d1|Cyp301a1|Cyp305a1|Cyp313b1|Cyp318a1|Cyp4aa1|Cyp4c3|Cyp4d20|Cyp4e1|Cyp4e2|Cyp4g15|Cyp4p1|Cyp4s3|Cyp6a14|Cyp6a17|Cyp6a20|Cyp6a21|Cyp6a23|Cyp6a9|Cyp6g1|Cyp6w1|Cyp9f2|Cyt-b5-r|Cyt-c-p|Gycalpha99B|Gycbeta100B|Nos|Pxd|mt:CoI|mt:CoII
72vs30h APF log2FC>2	biological_process	muscle contraction(GO:0006936)	9	12	13	75	92.3077	6.65813	0	0.00403371	CG2121|Ca-alpha1D|Chd64|KCNQ|Mhc|Mlc1|Rya-r44F|Tm1|fln
72vs30h APF log2FC>2	molecular_function	oxidoreductase activity, acting on a heme group of donors(GO:0016675)	13	23	24	56.5217	95.8333	6.51007	0	0.00403371	CG34172|CG42376|CoIV|CoVIII|CoVIIc|CoVIb|CoVa|CoVb|cype|levy|mt:CoI|mt:CoII|mt:CoIII
72vs30h APF log2FC>2	molecular_function	heme-copper terminal oxidase activity(GO:0015002)	13	23	24	56.5217	95.8333	6.51007	0	0.00403371	CG34172|CG42376|CoIV|CoVIII|CoVIIc|CoVIb|CoVa|CoVb|cype|levy|mt:CoI|mt:CoII|mt:CoIII
72vs30h APF log2FC>2	molecular_function	amino acid transmembrane transporter activity(GO:0015171)	20	47	49	42.5532	95.9184	6.38236	0	0.00403371	CG12531|CG13248|CG15279|CG16700|CG1698|CG1732|CG4991|CG5535|CG5549|CG7708|CG7888|CG8785|CG9413|Eaat1|List|VGAT|dmGlut|path|slif|tadr
72vs30h APF log2FC>2	molecular_function	oxidoreductase activity, acting on diphenols and related substances as donors(GO:0016679)	10	16	17	62.5	94.1176	6.15963	0	0.00403371	CG14482|CG3731|CG4169|CG7580|RFeSP|Ucrh|laccase2|mt:Cyt-b|ox|proPO-A1
72vs30h APF log2FC>2	cellular_component	intrinsic component of membrane(GO:0031224)	175	954	1152	18.3438	82.8125	6.12318	0	0.00403371	ABCB7|Ac3|Ac78C|Ace|AlCR2|Aph-4|Atpalpha|Baldspot|CG10219|CG10804|CG1208|CG1275|CG12858|CG13077|CG1358|CG13794|CG13995|CG14160|CG14196|CG14394|CG14439|CG14777|CG15096|CG15279|CG15890|CG1698|CG17111|CG1732|CG17600|CG17664|CG17841|CG1824|CG2003|CG30345|CG31100|CG31103|CG31106|CG31183|CG31272|CG31522|CG31760|CG32669|CG33110|CG33203|CG33253|CG33281|CG33639|CG33696|CG4019|CG42235|CG42269|CG4301|CG4306…
72vs30h APF log2FC>2	molecular_function	ATPase activity, coupled to transmembrane movement of ions, rotational mechanism(GO:0044769)	13	25	26	52	96.1538	6.09574	0	0.00403371	ATPsyn-beta|ATPsyn-gamma|Oscp|Vha26|Vha36-1|Vha55|Vha68-2|VhaAC45|VhaSFD|blw|l(1)G0230|mt:ATPase6|sun
72vs30h APF log2FC>2	biological_process	detection of UV(GO:0009589)	5	5	5	100	100	6.006	0	0.00403371	Rh3|Rh4|ninaB|ninaC|ninaD
72vs30h APF log2FC>2	cellular_component	extracellular region(GO:0005576)	77	341	435	22.5806	78.3908	5.97669	0	0.00403371	Akh|CG10186|CG12009|CG13308|CG13309|CG13643|CG13676|CG14125|CG14300|CG14301|CG14304|CG14607|CG14880|CG17575|CG31077|CG32036|CG33263|CG34324|CG42397|CG42729|CG5210|CG5639|CG6933|CG8192|CG8483|CG8861|Cda4|Cda5|ChLD3|Cht6|Cht7|Gasp|Gld|Hml|Idgf2|Idgf4|Lcp65Ag1|Mst57Da|Muc11A|Nplp1|Nplp2|Obp56d|Pal2|Pbprp2|Pdf|PebIII|Peritrophin-A|Ppn|Pvf1|Pxd|QC|ST6Gal|TepIII|alphaTry|amon|beat-Ia|beat-VII|bnl|burs|…
72vs30h APF log2FC>2	molecular_function	iron ion binding(GO:0005506)	36	123	156	29.2683	78.8462	5.83155	0	0.00403371	CG10219|CG31373|CG4769|CG9836|Cpr|Cyp12a5|Cyp12b2|Cyp12e1|Cyp18a1|Cyp28c1|Cyp28d1|Cyp301a1|Cyp305a1|Cyp313b1|Cyp318a1|Cyp4aa1|Cyp4c3|Cyp4d20|Cyp4e1|Cyp4e2|Cyp4g15|Cyp4p1|Cyp4s3|Cyp6a17|Cyp6a21|Cyp6a23|Cyp6g1|Cyp6w1|Cyp9f2|Cyt-b5-r|Cyt-c-p|Nos|Pxd|Trh|ple|v
72vs30h APF log2FC>2	molecular_function	neurotransmitter transporter activity(GO:0005326)	12	24	27	50	88.8889	5.67233	0	0.00403371	CG10804|CG13794|CG15279|CG1698|CG1732|CG43066|CG5549|List|SerT|VAChT|cpx|ine
72vs30h APF log2FC>2	biological_process	tricarboxylic acid cycle(GO:0006099)	16	38	41	42.1053	92.6829	5.65166	0	0.00403371	Acon|CG10219|CG5028|CG5214|CG6439|CG7430|Mdh2|Nc73EF|Scsalpha|SdhA|SdhB|SdhC|kdn|l(1)G0156|l(1)G0255|skap
72vs30h APF log2FC>2	cellular_component	organellar large ribosomal subunit(GO:0000315)	18	47	47	38.2979	100	5.48825	0	0.00403371	mRpL14|mRpL16|mRpL2|mRpL23|mRpL24|mRpL27|mRpL28|mRpL32|mRpL34|mRpL40|mRpL41|mRpL42|mRpL44|mRpL49|mRpL50|mRpL52|mRpL55|mRpL9
72vs30h APF log2FC>2	biological_process	glucan metabolic process(GO:0044042)	6	8	9	75	88.8889	5.43525	0	0.00403371	CG7766|CG8475|CG9485|GlyP|Pgm|PhKgamma
72vs30h APF log2FC>2	biological_process	single-organism carbohydrate catabolic process(GO:0044724)	13	29	30	44.8276	96.6667	5.3839	0	0.00403371	Ald|Eno|Gapdh1|Gapdh2|GlyP|Hex-A|Pfk|Pgi|Pgk|Pglym78|Pgm|PhKgamma|l(1)G0334
72vs30h APF log2FC>2	molecular_function	peptide receptor activity(GO:0001653)	17	44	47	38.6364	93.617	5.37821	0	0.00403371	AlCR2|CG13995|CG31183|CG33639|CG33696|CcapR|Dh44-R2|DmsR-1|DmsR-2|ETHR|Lgr1|Lkr|Proc-R|SIFR|rk|sNPF-R|star1
72vs30h APF log2FC>2	biological_process	neurotransmitter biosynthetic process(GO:0042136)	4	4	4	100	100	5.37166	0.0006	0.0107976	CG7708|Cha|Gad1|Tbh
72vs30h APF log2FC>2	molecular_function	water transmembrane transporter activity(GO:0005372)	5	6	7	83.3333	85.7143	5.33092	0	0.00403371	AQP|CG17664|CG4019|CG7777|Drip
72vs30h APF log2FC>2	cellular_component	proton-transporting two-sector ATPase complex, catalytic domain(GO:0033178)	12	26	27	46.1538	96.2963	5.3041	0	0.00403371	ATPsyn-beta|ATPsyn-gamma|Vha26|Vha36-1|Vha44|Vha55|Vha68-2|VhaAC45|VhaSFD|blw|l(1)G0230|sun
72vs30h APF log2FC>2	molecular_function	oxidoreductase activity, acting on paired donors, with incorporation or reduction of molecular oxygen(GO:0016705)	36	134	167	26.8657	80.2395	5.23395	0	0.00403371	CG8630|CG9747|Cyp12a5|Cyp12b2|Cyp12e1|Cyp18a1|Cyp28c1|Cyp28d1|Cyp301a1|Cyp305a1|Cyp313b1|Cyp318a1|Cyp4aa1|Cyp4c3|Cyp4d20|Cyp4e1|Cyp4e2|Cyp4g15|Cyp4p1|Cyp4s3|Cyp6a14|Cyp6a17|Cyp6a20|Cyp6a21|Cyp6a23|Cyp6a9|Cyp6g1|Cyp6w1|Cyp9f2|Cyt-b5-r|Nos|PO45|Tbh|Trh|ple|proPO-A1
72vs30h APF log2FC>2	biological_process	pyruvate metabolic process(GO:0006090)	14	34	35	41.1765	97.1429	5.17898	0	0.00403371	Ald|CG11876|CG1516|CG5261|Eno|Gapdh1|Gapdh2|Hex-A|Men-b|Pfk|Pgi|Pgk|Pglym78|l(1)G0334
72vs30h APF log2FC>2	biological_process	flight behavior(GO:0007629)	10	20	21	50	95.2381	5.17706	0	0.00403371	Actn|Ca-P60A|Gpdh|Gpo-1|Hk|Sh|Tbh|eag|sesB|t
72vs30h APF log2FC>2	biological_process	regulation of transmembrane transport(GO:0034762)	9	18	20	50	90	4.9109	0	0.00403371	Ca-alpha1D|ClC-a|Irk2|Irk3|Sh|Shab|Shal|eag|para
72vs30h APF log2FC>2	biological_process	calcium ion homeostasis(GO:0055074)	7	12	13	58.3333	92.3077	4.89173	0.0004	0.00750339	Ca-P60A|Cbp53E|Nmdar1|Oamb|Rya-r44F|sesB|up
72vs30h APF log2FC>2	molecular_function	oxidoreductase activity, acting on the CH-CH group of donors, quinone or related compound as acceptor(GO:0016635)	5	7	7	71.4286	100	4.79493	0	0.00403371	CG10219|SdhA|SdhB|SdhC|su(r)
72vs30h APF log2FC>2	biological_process	acetate ester metabolic process(GO:1900619)	3	3	3	100	100	4.65176	0.0014	0.0224558	Ace|CG7708|Cha
72vs30h APF log2FC>2	biological_process	ovulation(GO:0030728)	3	3	4	100	75	4.65176	0.001	0.0171257	Est-6|Oamb|Tbh
72vs30h APF log2FC>2	cellular_component	phosphorylase kinase complex(GO:0005964)	3	3	3	100	100	4.65176	0.0014	0.0224558	CG7766|CG8475|PhKgamma
72vs30h APF log2FC>2	biological_process	action potential(GO:0001508)	3	3	3	100	100	4.65176	0.001	0.0171257	Sh|Shab|sesB
72vs30h APF log2FC>2	molecular_function	microfilament motor activity(GO:0000146)	3	3	3	100	100	4.65176	0.0014	0.0224558	Mhc|Mlc1|Mlc2
72vs30h APF log2FC>2	biological_process	acetyl-CoA metabolic process(GO:0006084)	4	5	5	80	100	4.63824	0.0012	0.0198966	AcCoAS|CG10268|CG5261|CG7920
72vs30h APF log2FC>2	biological_process	response to mechanical stimulus(GO:0009612)	8	16	18	50	88.8889	4.62958	0.0002	0.00403371	Atpalpha|Gad1|Rdl|Tpi|nompC|para|sesB|tko
72vs30h APF log2FC>2	biological_process	phenol-containing compound biosynthetic process(GO:0046189)	6	10	10	60	100	4.6263	0	0.00403371	Tbh|Trh|ple|t|y|yellow-f2
72vs30h APF log2FC>2	molecular_function	cofactor binding(GO:0048037)	41	175	188	23.4286	93.0851	4.59118	0	0.00403371	Alas|CG1640|CG1970|CG31674|CG5028|CG5703|CG5804|CG6020|CG6142|CG6439|CG7430|CG7433|CG7580|CG8745|CG8768|CG8814|CG9140|CG9172|CG9514|CG9518|CG9521|Cpr|Dbi|Gad1|Gale|Gapdh1|Gapdh2|Gld|GlyP|Gpdh|Men-b|Mical|Nc73EF|Nos|Scsalpha|SdhA|Sirt4|b|l(1)G0156|mtacp1|slgA
72vs30h APF log2FC>2	molecular_function	glucuronosyltransferase activity(GO:0015020)	11	27	34	40.7407	79.4118	4.54421	0.0002	0.00403371	Act57B|CG15661|CG17323|CG4302|CG5724|Ugt35b|Ugt36Ba|Ugt36Bc|Ugt37b1|Ugt86Da|Ugt86Dh
72vs30h APF log2FC>2	biological_process	sarcomere organization(GO:0045214)	9	20	21	45	95.2381	4.49267	0.0004	0.00750339	Actn|Mical|Mlp84B|Unc-89|bt|fln|sls|up|wupA
72vs30h APF log2FC>2	molecular_function	neuropeptide hormone activity(GO:0005184)	12	32	35	37.5	91.4286	4.38691	0.0002	0.00403371	Akh|Ast|Dh31|Dh44-R2|Fmrf|Mip|Nplp1|Nplp2|Pdf|Proct|Tk|burs
72vs30h APF log2FC>2	molecular_function	intracellular ligand-gated ion channel activity(GO:0005217)	5	8	9	62.5	88.8889	4.35377	0.0004	0.00750339	Cng|Ih|Rya-r44F|cngl|trp
72vs30h APF log2FC>2	cellular_component	rhabdomere(GO:0016028)	9	21	26	42.8571	80.7692	4.30327	0.0004	0.00750339	Arr2|Gbeta76C|Mob2|inaD|ninaC|ninaE|rtp|trp|trpl
72vs30h APF log2FC>2	molecular_function	guanylate cyclase activity(GO:0004383)	6	11	14	54.5455	78.5714	4.29889	0.0004	0.00750339	CG10738|CG31183|CG33958|CG34357|Gycalpha99B|Gycbeta100B
72vs30h APF log2FC>2	biological_process	G-protein coupled receptor signaling pathway(GO:0007186)	39	172	189	22.6744	91.0053	4.2459	0	0.00403371	Akh|AlCR2|Ast|CG13995|CG31760|CG33639|CG33696|CG43795|CG7497|CcapR|Dh31|Dh44-R2|DmsR-1|DmsR-2|DopEcR|ETHR|Fmrf|Gbeta76C|Lgr1|Lkr|Mip|Nplp1|Nplp2|Oamb|Pdf|Proc-R|Rh3|Rh4|SIFR|Tbh|Tk|boss|jv|mthl9|ninaE|rk|sNPF-R|star1|trp
72vs30h APF log2FC>2	molecular_function	metal Mfuzz Cluster binding(GO:0051540)	14	42	48	33.3333	87.5	4.20096	0.0002	0.00403371	Acon|CG1319|CG13623|CG3420|CG9140|CG9172|CG9836|Las|ND23|ND75|RFeSP|SdhB|l(1)G0136|su(r)
72vs30h APF log2FC>2	molecular_function	calmodulin binding(GO:0005516)	10	26	29	38.4615	89.6552	4.10323	0	0.00403371	CG7766|CG8475|CanB|Nos|PhKgamma|igl|inaD|ninaC|trp|trpl
72vs30h APF log2FC>2	biological_process	medium-term memory(GO:0072375)	4	6	7	66.6667	85.7143	4.08226	0.0026	0.0383035	CanA1|Nmdar1|Nmdar2|inx7
72vs30h APF log2FC>2	biological_process	flight(GO:0060361)	4	6	7	66.6667	85.7143	4.08226	0.0026	0.0383035	GlyP|Hex-A|Mhc|Pgm
72vs30h APF log2FC>2	cellular_component	virion part(GO:0044423)	4	6	8	66.6667	75	4.08226	0.0018	0.0277169	CG15772|CG42598|CG42749|form3
72vs30h APF log2FC>2	molecular_function	oxidoreductase activity, acting on the aldehyde or oxo group of donors(GO:0016903)	13	39	44	33.3333	88.6364	4.04754	0.0002	0.00403371	Adh|CG11876|CG12268|CG1441|CG1443|CG14893|CG17691|CG30427|CG8303|Gapdh1|Gapdh2|Nc73EF|l(1)G0334
72vs30h APF log2FC>2	cellular_component	inaD signaling complex(GO:0016027)	5	9	10	55.5556	90	3.9808	0.0016	0.0249848	inaD|ninaC|ninaE|trp|trpl
72vs30h APF log2FC>2	biological_process	glutamine family amino acid catabolic process(GO:0009065)	5	9	10	55.5556	90	3.9808	0.0024	0.0358341	CG8745|Gad1|Gdh|Gs2|slgA
72vs30h APF log2FC>2	biological_process	glutamate metabolic process(GO:0006536)	5	9	10	55.5556	90	3.9808	0.0012	0.0198966	CG8745|Gad1|Gdh|Gs2|slgA
72vs30h APF log2FC>2	cellular_component	lipid particle(GO:0005811)	49	240	250	20.4167	96	3.95037	0.0002	0.00403371	ATPsyn-b|ATPsyn-beta|ATPsyn-d|ATPsyn-gamma|Acon|Acsl|Adh|Adk2|CG11876|CG1516|CG32694|CG3321|CG3731|CG4169|CG4692|CG4769|CG5214|CG5261|CG6415|CG7430|CG7580|CG7630|CG7920|Ca-P60A|CoIV|CoVa|CoVb|Cpr|Cpr64Ad|Cyt-b5-r|Eno|Gapdh1|Gapdh2|Gpdh|Gpo-1|Hsc70-1|Mdh2|ND42|Oscp|Pgi|blw|cype|l(1)G0156|l(1)G0230|l(2)06225|levy|sesB|v(2)k05816|vkg
72vs30h APF log2FC>2	molecular_function	cyclic nucleotide-gated ion channel activity(GO:0043855)	3	4	5	75	80	3.84253	0.0072	0.0873271	Cng|Ih|cngl
72vs30h APF log2FC>2	cellular_component	meprin A complex(GO:0017090)	3	4	4	75	100	3.84253	0.0048	0.0631489	CG6696|CG6763|CG6974
72vs30h APF log2FC>2	cellular_component	sarcoplasmic reticulum(GO:0016529)	3	4	4	75	100	3.84253	0.0054	0.0693927	Ca-P60A|Scp1|Scp2
72vs30h APF log2FC>2	biological_process	phototransduction, visible light(GO:0007603)	3	4	6	75	66.6667	3.84253	0.0074	0.0886598	ninaB|ninaC|ninaD
72vs30h APF log2FC>2	biological_process	water transport(GO:0006833)	3	4	4	75	100	3.84253	0.0062	0.0777547	AQP|CG7777|Drip
72vs30h APF log2FC>2	cellular_component	brush border(GO:0005903)	3	4	4	75	100	3.84253	0.0048	0.0631489	Myo61F|Nha1|Vha55
72vs30h APF log2FC>2	molecular_function	N-acetylgalactosamine-4-sulfatase activity(GO:0003943)	3	4	4	75	100	3.84253	0.0044	0.0590267	CG32191|CG7402|CG7408
72vs30h APF log2FC>2	biological_process	cyclic nucleotide biosynthetic process(GO:0009190)	9	24	27	37.5	88.8889	3.79765	0.0014	0.0224558	Ac3|Ac76E|Ac78C|CG10738|CG31183|CG33958|CG34357|Gycalpha99B|Gycbeta100B
72vs30h APF log2FC>2	biological_process	glucose metabolic process(GO:0006006)	6	13	14	46.1538	92.8571	3.74812	0.0014	0.0224558	CG1516|Gapdh1|Gapdh2|Gld|Pgi|PhKgamma
72vs30h APF log2FC>2	molecular_function	anion(GO:0015296)	13	42	44	30.9524	95.4545	3.72816	0.0006	0.0107976	CG15096|CG1732|CG2003|CG42235|CG5549|CG6293|CG6723|CG7708|CG9657|Eaat1|Picot|dmGlut|salt
72vs30h APF log2FC>2	biological_process	regulation of body fluid levels(GO:0050878)	4	7	10	57.1429	70	3.63884	0.0034	0.0480121	Dh31|Hml|Tg|trpl
72vs30h APF log2FC>2	cellular_component	fumarate reductase complex(GO:0045283)	4	7	7	57.1429	100	3.63884	0.0042	0.0566009	CG10219|SdhA|SdhB|SdhC
72vs30h APF log2FC>2	biological_process	metallo-sulfur Mfuzz Cluster assembly(GO:0031163)	4	7	10	57.1429	70	3.63884	0.005	0.0650073	ABCB7|CG13623|CG9836|l(1)G0136
72vs30h APF log2FC>2	biological_process	myofibril assembly(GO:0030239)	4	7	8	57.1429	87.5	3.63884	0.0046	0.0609707	Act88F|Mhc|up|wupA
72vs30h APF log2FC>2	biological_process	renal system process(GO:0003014)	4	7	7	57.1429	100	3.63884	0.004	0.0550793	CG17664|CG4019|Drip|Nha1
72vs30h APF log2FC>2	biological_process	larval locomotory behavior(GO:0008345)	7	18	19	38.8889	94.7368	3.46821	0.0018	0.0277169	Eaat1|Gad1|Sh|Shab|Syt1|Tbh|amon
72vs30h APF log2FC>2	biological_process	cuticle pigmentation(GO:0048067)	5	11	11	45.4545	100	3.37647	0.0032	0.045478	Pu|burs|ple|t|y
72vs30h APF log2FC>2	molecular_function	lipoprotein particle receptor activity(GO:0030228)	5	11	11	45.4545	100	3.37647	0.0042	0.0566009	CG31221|CG8909|LpR2|cue|verm
72vs30h APF log2FC>2	biological_process	regulation of circadian sleep/wake cycle(GO:0042749)	7	19	20	36.8421	95	3.29037	0.003	0.0432606	Ih|Pdf|Rdl|Sh|Trh|qvr|tim
72vs30h APF log2FC>2	molecular_function	fatty acid ligase activity(GO:0015645)	4	8	8	50	100	3.27229	0.0064	0.0793636	Acsl|CG12512|CG3961|bgm
72vs30h APF log2FC>2	molecular_function	diazepam binding(GO:0050809)	3	5	6	60	83.3333	3.27047	0.0126	0.134735	CG5804|CG8814|Dbi
72vs30h APF log2FC>2	cellular_component	contractile fiber(GO:0043292)	3	5	5	60	100	3.27047	0.013	0.137026	Mhc|Mp20|fln
72vs30h APF log2FC>2	biological_process	hormone catabolic process(GO:0042447)	3	5	5	60	100	3.27047	0.0118	0.128508	Cyp18a1|Jheh2|Jheh3
72vs30h APF log2FC>2	biological_process	regulation of muscle contraction(GO:0006937)	3	5	5	60	100	3.27047	0.012	0.130047	DmsR-1|DmsR-2|Fmrf
72vs30h APF log2FC>2	molecular_function	alcohol dehydrogenase (NAD) activity(GO:0004022)	3	5	6	60	83.3333	3.27047	0.0126	0.134735	Adh|CG4842|Pdh
72vs30h APF log2FC>2	molecular_function	metalloendopeptidase activity(GO:0004222)	18	74	82	24.3243	90.2439	3.20675	0.0014	0.0224558	CG10280|CG14528|CG14529|CG15255|CG3731|CG4169|CG42255|CG4721|CG5131|CG6696|CG6763|CG6974|CG9850|Invadolysin|Nep1|Nep3|Phae1|Ppn
72vs30h APF log2FC>2	biological_process	cytochrome complex assembly(GO:0017004)	5	12	12	41.6667	100	3.12533	0.0084	0.0989011	CG31648|CG5037|CG7598|CG9065|Cchl
72vs30h APF log2FC>2	molecular_function	CoA-ligase activity(GO:0016405)	5	12	13	41.6667	92.3077	3.12533	0.0072	0.0873271	AcCoAS|CG11453|Scsalpha|SdhA|skap
72vs30h APF log2FC>2	biological_process	terpenoid metabolic process(GO:0006721)	5	12	12	41.6667	100	3.12533	0.008	0.0949491	Jheh2|Jheh3|Pdh|jhamt|ninaB
72vs30h APF log2FC>2	biological_process	response to toxic substance(GO:0009636)	6	16	16	37.5	100	3.09952	0.007	0.085605	Ace|Cyp6g1|Jheh2|Jheh3|Rdl|para
72vs30h APF log2FC>2	cellular_component	extracellular space(GO:0005615)	37	192	306	19.2708	62.7451	3.03443	0.0014	0.0224558	Acp53C14b|Aph-4|CG10264|CG10407|CG13309|CG13618|CG14457|CG15117|CG15201|CG15202|CG15203|CG1552|CG15537|CG16820|CG17575|CG17633|CG18628|CG31997|CG34034|CG5210|CG5402|CG5867|CG5945|CG7079|CG9029|Ccp84Ad|Cpr51A|Est-6|Ilp8|Mst57Da|Neb-cGP|Npc2b|Nplp2|Peritrophin-A|TepIII|scpr-A|to
72vs30h APF log2FC>2	biological_process	sleep(GO:0030431)	8	25	27	32	92.5926	3.03424	0.007	0.085605	CanA1|CanB|Hk|Ih|Rdl|Sh|mt:CoI|tim
72vs30h APF log2FC>2	molecular_function	hydrolase activity, hydrolyzing O-glycosyl compounds(GO:0004553)	21	95	100	22.1053	95	2.97274	0.004	0.0550793	Amy-d|Amy-p|CG11159|CG14015|CG15117|CG31202|CG33080|CG5210|CG7766|CG7997|CG8475|CG8492|CG9485|CG9701|Cht6|Cht7|Idgf2|Idgf4|LysE|LysS|Mal-B2
72vs30h APF log2FC>2	biological_process	muscle cell cellular homeostasis(GO:0046716)	4	9	9	44.4444	100	2.96112	0.0094	0.108511	mt:ATPase6|sesB|up|wupA
72vs30h APF log2FC>2	cellular_component	periplasmic space(GO:0042597)	4	9	9	44.4444	100	2.96112	0.0138	0.142407	GluRIIE|Nmdar1|Nmdar2|clumsy
72vs30h APF log2FC>2	biological_process	negative regulation of peptidase activity(GO:0010466)	4	9	13	44.4444	69.2308	2.96112	0.0134	0.13991	CG10186|CG5639|Ppn|m1
72vs30h APF log2FC>2	biological_process	synaptic transmission(GO:0007268)	19	84	88	22.619	95.4545	2.93838	0.0038	0.0526529	Ace|Acsl|Atpalpha|Ca-P60A|Cha|Eaat1|KaiRIA|Nrx-1|Pgk|Rbp|Shab|Shal|Slob|Snap25|Syt1|para|sesB|sif|stj
72vs30h APF log2FC>2	biological_process	aromatic amino acid family metabolic process(GO:0009072)	6	17	18	35.2941	94.4444	2.91674	0.0094	0.108511	Trh|hgo|ple|v|y|yellow-f2
72vs30h APF log2FC>2	molecular_function	acid-thiol ligase activity(GO:0016878)	5	13	14	38.4615	92.8571	2.89953	0.01	0.113223	AcCoAS|CG11453|Scsalpha|SdhA|skap
72vs30h APF log2FC>2	molecular_function	choline dehydrogenase activity(GO:0008812)	5	13	15	38.4615	86.6667	2.89953	0.0098	0.111529	CG6142|CG9514|CG9518|CG9521|Gld
72vs30h APF log2FC>2	biological_process	cellular anion homeostasis(GO:0030002)	3	6	7	50	85.7143	2.8336	0.0244	0.220447	CG5804|CG8814|Dbi
72vs30h APF log2FC>2	biological_process	response to hormone(GO:0009725)	3	6	8	50	75	2.8336	0.0214	0.19882	AlCR2|ftz-f1|star1
72vs30h APF log2FC>2	molecular_function	isocitrate dehydrogenase (NAD+) activity(GO:0004449)	3	6	6	50	100	2.8336	0.022	0.203116	CG5028|CG6439|l(1)G0156
72vs30h APF log2FC>2	cellular_component	mitochondrial matrix(GO:0005759)	13	53	57	24.5283	92.9825	2.75651	0.0068	0.083854	Alas|CG1319|CG1516|CG3731|CG5028|CG7433|Cyt-c-p|Gdh|Mdh2|ND42|kdn|l(1)G0156|slgA
72vs30h APF log2FC>2	biological_process	sensory perception of light stimulus(GO:0050953)	5	14	15	35.7143	93.3333	2.69461	0.0156	0.156071	Rh3|Rh4|boss|ninaE|t
72vs30h APF log2FC>2	biological_process	skeletal muscle tissue development(GO:0007519)	5	14	14	35.7143	100	2.69461	0.0156	0.156071	Mlp84B|rost|sls|vkg|wupA
72vs30h APF log2FC>2	molecular_function	organic hydroxy compound transmembrane transporter activity(GO:1901618)	4	10	12	40	83.3333	2.6915	0.0188	0.179952	CG3476|CG7708|CG8925|SerT
72vs30h APF log2FC>2	biological_process	body morphogenesis(GO:0010171)	4	10	21	40	47.619	2.6915	0.017	0.165951	TwdlBeta|TwdlG|TwdlT|TwdlW
72vs30h APF log2FC>2	molecular_function	photoreceptor activity(GO:0009881)	4	10	10	40	100	2.6915	0.0234	0.213152	Rh3|Rh4|ine|ninaE
72vs30h APF log2FC>2	molecular_function	vitamin E binding(GO:0008431)	4	10	11	40	90.9091	2.6915	0.0216	0.199839	CG10237|CG10300|CG2663|CG3091
72vs30h APF log2FC>2	molecular_function	triglyceride lipase activity(GO:0004806)	9	34	43	26.4706	79.0698	2.55258	0.0114	0.125542	CG10116|CG11406|CG13282|CG31871|CG34447|CG6753|CG6847|CG7367|Lip1
72vs30h APF log2FC>2	biological_process	mating behavior(GO:0007617)	8	29	35	27.5862	82.8571	2.54081	0.0138	0.142407	Est-6|Sh|Tbh|eag|ple|tim|tko|to
72vs30h APF log2FC>2	biological_process	regulation of MAP kinase activity(GO:0043405)	5	15	16	33.3333	93.75	2.50715	0.0198	0.187697	bnl|btl|ics|rab3-GEF|sgg
72vs30h APF log2FC>2	biological_process	organic hydroxy compound transport(GO:0015850)	5	15	17	33.3333	88.2353	2.50715	0.021	0.19572	CG3476|CG7708|Npc2b|SerT|Vmat
72vs30h APF log2FC>2	molecular_function	vitamin transporter activity(GO:0051183)	3	7	8	42.8571	87.5	2.48275	0.0368	0.302813	CG32669|CG42235|CG6293
72vs30h APF log2FC>2	biological_process	protein-chromophore linkage(GO:0018298)	3	7	7	42.8571	100	2.48275	0.0402	0.324163	Rh3|Rh4|ninaE
72vs30h APF log2FC>2	biological_process	toxin metabolic process(GO:0009404)	3	7	10	42.8571	70	2.48275	0.0364	0.30064	Cyp4aa1|Cyp6a9|Cyp6g1
72vs30h APF log2FC>2	biological_process	xenobiotic metabolic process(GO:0006805)	3	7	10	42.8571	70	2.48275	0.0364	0.30064	Cyp4aa1|Cyp6a9|Cyp6g1
72vs30h APF log2FC>2	molecular_function	Toll binding(GO:0005121)	3	7	7	42.8571	100	2.48275	0.037	0.304176	spz3|spz4|spz5
72vs30h APF log2FC>2	molecular_function	monooxygenase activity(GO:0004497)	9	35	37	25.7143	94.5946	2.45293	0.0124	0.133564	Cyp18a1|Cyp318a1|Cyp4aa1|Nos|PO45|Tbh|Trh|ple|proPO-A1
72vs30h APF log2FC>2	molecular_function	glutathione transferase activity(GO:0004364)	9	35	36	25.7143	97.2222	2.45293	0.0116	0.127427	CG11784|CG17639|CG33177|CG6673|GstE10|GstE2|GstE6|GstS1|se
72vs30h APF log2FC>2	molecular_function	calcium ion binding(GO:0005509)	35	198	213	17.6768	92.9577	2.38967	0.0242	0.219087	Actn|Amy-d|AnnX|CG3009|CG31202|CG31345|CG31475|CG32373|CG42237|CG42255|CG4733|CG8909|CG9297|Cad96Ca|CanB|Cbp53E|Cpn|Fim|Gpo-1|LpR2|Mlc1|Mlc2|Mp20|Nox|Rya-r44F|Scp1|Scp2|Syt1|Teh4|TpnC25D|TpnC4|TpnC47D|elm|up|wry
72vs30h APF log2FC>2	biological_process	energy taxis(GO:0009453)	5	16	17	31.25	94.1176	2.3345	0.0292	0.256485	Ace|Gycalpha99B|Nmdar1|slgA|tim
72vs30h APF log2FC>2	biological_process	isoprenoid biosynthetic process(GO:0008299)	4	12	13	33.3333	92.3077	2.24213	0.0412	0.328635	CG10268|jhamt|ninaB|qless
72vs30h APF log2FC>2	biological_process	adult somatic muscle development(GO:0007527)	4	12	13	33.3333	92.3077	2.24213	0.0416	0.330042	Mhc|Unc-89|cora|fln
72vs30h APF log2FC>2	biological_process	neurotransmitter transport(GO:0006836)	20	104	120	19.2308	86.6667	2.21075	0.0278	0.246388	CG10804|CG13794|CG15279|CG1698|CG1732|CG43066|CG5549|CanA1|CanB|List|SerT|Snap25|Syn|Syt1|Syt12|VAChT|Vmat|cpx|ine|rab3-GEF
72vs30h APF log2FC>2	biological_process	regulation of synaptic transmission(GO:0050804)	11	49	50	22.449	98	2.20377	0.0202	0.189863	KaiRIA|Rdl|Sh|Shab|Slob|Snap25|Syt1|cpx|qvr|spz5|wgn
72vs30h APF log2FC>2	biological_process	glutamine metabolic process(GO:0006541)	3	8	8	37.5	100	2.19081	0.0486	0.369043	Gs2|dmGlut|l(3)72Dp
72vs30h APF log2FC>2	biological_process	response to oxidative stress(GO:0006979)	14	67	73	20.8955	91.7808	2.18918	0.0338	0.286378	CG10211|CG42331|CG5873|CG6673|CG9172|GstS1|Pink1|Pxd|SdhC|cln3|l(3)neo18|mol|sesB|sun
72vs30h APF log2FC>2	molecular_function	extracellular matrix structural constituent(GO:0005201)	7	27	28	25.9259	96.4286	2.18724	0.0266	0.237895	Cg25C|Muc11A|Muc91C|Mur29B|Ppn|resilin|vkg
72vs30h APF log2FC>2	biological_process	activation of protein kinase activity(GO:0032147)	4	13	13	30.7692	100	2.05093	0.048	0.3648	bnl|boss|btl|rab3-GEF
72vs30h APF log2FC>2	biological_process	monocarboxylic acid biosynthetic process(GO:0072330)	7	29	31	24.1379	93.5484	1.97219	0.0374	0.306044	CG31522|CG33110|Cyt-b5-r|Gad1|Las|mtacp1|t
72vs30h APF log2FC>2	UserSuppliedAssociations	WTvssalm_72hAPF_log2FC>2	282	449	449	62.8062	100	34.0826	0	0.00102414	AQP|ATPsyn-Cf6|ATPsyn-b|ATPsyn-beta|ATPsyn-d|ATPsyn-gamma|Acon|Acsl|Act88F|Actn|Adk1|Adk2|Alas|Ald|CG10219|CG10320|CG10340|CG1041|CG10561|CG10802|CG11044|CG11099|CG11275|CG11455|CG11617|CG11722|CG11752|CG11876|CG11878|CG12091|CG12105|CG12162|CG12203|CG12400|CG12848|CG12859|CG13026|CG13048|CG13365|CG13587|CG13623|CG14022|CG14130|CG14147|CG14168|CG14196|CG14270|CG14290|CG14300|CG14482|CG14570|CG146…
72vs30h APF log2FC>2	UserSuppliedAssociations	WTvssalm_99hAPF_log2FC>2	260	448	448	58.0357	100	30.8589	0	0.00102414	ATPsyn-Cf6|ATPsyn-b|ATPsyn-d|ATPsyn-gamma|Acon|Act88F|Adh|Alas|Ald|CG10219|CG10320|CG10340|CG10514|CG10581|CG10585|CG10802|CG11029|CG11035|CG11050|CG11455|CG11617|CG11722|CG11752|CG11784|CG11876|CG12105|CG12203|CG12400|CG12506|CG12672|CG12848|CG12859|CG13026|CG13067|CG13365|CG13587|CG1368|CG13810|CG13865|CG14022|CG14075|CG14168|CG14222|CG14270|CG14482|CG14573|CG14683|CG14757|CG14777|CG14780|CG148…
72vs30h APF log2FC>2	UserSuppliedAssociations	Mfuzz Cluster13	166	256	256	64.8438	100	26.5604	0	0.00102414	825-Oak|Adk2|Alas|Ast|CG10232|CG10407|CG10512|CG10585|CG10738|CG11000|CG11159|CG11686|CG11786|CG12519|CG12655|CG12769|CG13026|CG13051|CG13069|CG13183|CG13506|CG13627|CG13674|CG13678|CG13679|CG1368|CG13868|CG14022|CG14096|CG14274|CG14619|CG1516|CG15203|CG15528|CG15772|CG1657|CG16700|CG17190|CG17404|CG18765|CG1885|CG2145|CG2162|CG30377|CG31706|CG31808|CG32191|CG32214|CG32428|CG33056|CG33170|CG33263…
72vs30h APF log2FC>2	UserSuppliedAssociations	Mfuzz Cluster22	198	351	351	56.4103	100	26.2532	0	0.00102414	ABCB7|AQP|ATPsyn-gamma|Ac76E|Ace|Acon|Acsl|Act88F|Actn|Ald|Atpalpha|CG10031|CG10068|CG10186|CG10340|CG10561|CG11099|CG11236|CG11474|CG11784|CG11876|CG12091|CG12162|CG12239|CG12484|CG13565|CG14141|CG14168|CG14290|CG1443|CG15546|CG16986|CG17572|CG17841|CG1824|CG1970|CG2121|CG2930|CG31221|CG31522|CG31676|CG32649|CG3362|CG34034|CG34134|CG34446|CG3476|CG40485|CG4169|CG4213|CG42269|CG42337|CG4297|CG430…
72vs30h APF log2FC>2	UserSuppliedAssociations	Mfuzz Cluster26	137	193	193	70.9845	100	25.6686	0	0.00102414	Acp53C14b|Acp65Aa|Ance-2|Arr2|CG10257|CG10268|CG10280|CG10598|CG10953|CG12964|CG13046|CG13047|CG13048|CG13049|CG13062|CG13065|CG13066|CG13071|CG13217|CG13231|CG13308|CG13566|CG13699|CG13721|CG13731|CG14095|CG14147|CG14191|CG14329|CG14570|CG14607|CG14961|CG15212|CG15358|CG15650|CG16721|CG17575|CG17600|CG17639|CG18367|CG2157|CG2837|CG30195|CG30196|CG30457|CG32213|CG32548|CG33177|CG34205|CG34445|CG4…
72vs30h APF log2FC>2	UserSuppliedAssociations	Mfuzz Cluster3	172	373	373	46.1126	100	20.8335	0	0.00102414	ATPsyn-Cf6|ATPsyn-b|ATPsyn-d|Acyp2|Adh|Adk1|AnnX|Baldspot|CG10219|CG10320|CG10802|CG11147|CG11200|CG11455|CG11752|CG12203|CG12400|CG12672|CG12859|CG1319|CG13365|CG13623|CG14394|CG14482|CG14671|CG14806|CG14880|CG14997|CG15021|CG15293|CG15412|CG15629|CG15890|CG16857|CG17027|CG1746|CG17633|CG17664|CG1774|CG18317|CG30022|CG30285|CG30415|CG31087|CG31102|CG31637|CG31674|CG31690|CG31705|CG31751|CG31823|…
72vs30h APF log2FC>2	UserSuppliedAssociations	Salm core 133 genes (Spletter et al, 2015)	91	131	133	69.4656	98.4962	20.5551	0	0.00102414	ATPsyn-Cf6|ATPsyn-gamma|Acon|Act88F|CG10514|CG10802|CG12105|CG12506|CG13067|CG13587|CG1368|CG14168|CG14222|CG14270|CG14482|CG14683|CG14757|CG1746|CG17726|CG1774|CG1885|CG31871|CG33054|CG33177|CG33228|CG34196|CG34242|CG34248|CG3608|CG3731|CG3964|CG42237|CG42337|CG4627|CG4733|CG4769|CG4825|CG4882|CG5028|CG5214|CG5261|CG6439|CG6455|CG6723|CG7430|CG7630|CG8067|CG8630|CG9411|CG9485|ECSIT|FBgn0265045|F…
72vs30h APF log2FC>2	UserSuppliedAssociations	Mfuzz Cluster35	129	241	241	53.527	100	20.2599	0	0.00102414	ATPsyn-beta|Ac3|Act57B|Ast-CC|CG10804|CG10830|CG11406|CG12105|CG12269|CG12502|CG12531|CG12541|CG12723|CG12858|CG12913|CG13239|CG1358|CG13594|CG13739|CG13995|CG14015|CG14186|CG14234|CG14509|CG14528|CG14568|CG14591|CG14661|CG14762|CG1537|CG15431|CG1545|CG15537|CG1732|CG17364|CG2993|CG30118|CG30158|CG30283|CG31145|CG31183|CG31516|CG31646|CG31760|CG32432|CG32506|CG33203|CG33988|CG34370|CG42540|CG4261…
72vs30h APF log2FC>2	UserSuppliedAssociations	MitoExplorer_Electron_Transport_Chain	109	186	192	58.6022	96.875	19.9209	0	0.00102414	ATPsyn-Cf6|ATPsyn-b|ATPsyn-beta|ATPsyn-d|ATPsyn-gamma|CG10219|CG10320|CG10340|CG11455|CG11722|CG11752|CG12203|CG12400|CG12859|CG14482|CG14757|CG15908|CG1746|CG17726|CG1970|CG31648|CG3192|CG3214|CG32230|CG32649|CG3321|CG34117|CG34150|CG34172|CG3420|CG34439|CG3446|CG3608|CG3621|CG3683|CG3731|CG4169|CG42376|CG4627|CG4692|CG4769|CG5037|CG5548|CG5569|CG5703|CG6020|CG6463|CG7506|CG7580|CG7598|CG7712|CG…
72vs30h APF log2FC>2	UserSuppliedAssociations	WTvssalm_30hAPF_log2FC>2	149	398	398	37.4372	100	16.0942	0	0.00102414	AQP|ATPsyn-Cf6|ATPsyn-b|ATPsyn-d|ATPsyn-gamma|Acon|Act88F|Ald|CG10219|CG10280|CG10320|CG10340|CG11447|CG11752|CG11876|CG12203|CG12400|CG12848|CG12859|CG13026|CG13048|CG13069|CG13365|CG14022|CG14095|CG14147|CG14168|CG14757|CG15456|CG15908|CG1746|CG17726|CG1814|CG1824|CG1885|CG30415|CG3192|CG32649|CG3321|CG3446|CG3608|CG3621|CG3683|CG3731|CG4169|CG42319|CG43129|CG4627|CG4692|CG4769|CG4882|CG5028|CG…
72vs30h APF log2FC>2	UserSuppliedAssociations	Mfuzz Cluster21	159	490	490	32.449	100	14.4351	0	0.00102414	AcCoAS|Akh|AlCR2|CAH1|CAH2|CG10116|CG10513|CG10550|CG10562|CG10650|CG10680|CG10911|CG10912|CG11378|CG11384|CG11407|CG11453|CG11592|CG11892|CG12512|CG1275|CG12974|CG13077|CG13116|CG13360|CG13587|CG13704|CG14120|CG14160|CG14292|CG14356|CG14777|CG14780|CG15096|CG15152|CG15201|CG15661|CG15818|CG17026|CG17839|CG18088|CG18480|CG2556|CG30016|CG30345|CG30371|CG30411|CG3091|CG31004|CG31103|CG31104|CG31202…
72vs30h APF log2FC>2	UserSuppliedAssociations	All_MitoInteractome_genes	257	1002	1065	25.6487	94.0845	14.134	0	0.00102414	ABCB7|ATPsyn-Cf6|ATPsyn-b|ATPsyn-beta|ATPsyn-d|ATPsyn-gamma|AcCoAS|Acon|Acsl|Adh|Adk2|Alas|Ald|Buffy|CAH1|CAH2|CG10219|CG10320|CG10340|CG1041|CG10585|CG11035|CG11147|CG11407|CG11447|CG11455|CG11722|CG11752|CG11876|CG12091|CG12203|CG12400|CG12512|CG12848|CG12859|CG12935|CG1319|CG13284|CG13623|CG14130|CG14270|CG14290|CG14482|CG14757|CG14777|CG14806|CG14997|CG1516|CG15908|CG1640|CG16935|CG16985|CG16…
72vs30h APF log2FC>2	UserSuppliedAssociations	Salm core genes (Spletter et al, 2015)	175	710	742	24.6479	95.6873	10.9058	0	0.00102414	ATPsyn-Cf6|ATPsyn-gamma|Acon|Act88F|CG10186|CG10514|CG10802|CG11050|CG11455|CG12105|CG12506|CG13067|CG13188|CG13506|CG13587|CG1368|CG14168|CG14222|CG14246|CG14270|CG14482|CG14619|CG14683|CG14757|CG14777|CG1636|CG16721|CG1746|CG17726|CG1774|CG17839|CG18317|CG1885|CG2157|CG2162|CG30118|CG31145|CG31871|CG33054|CG33177|CG33228|CG34196|CG34242|CG34248|CG34439|CG3608|CG3731|CG3964|CG42237|CG42319|CG423…
72vs30h APF log2FC>2	UserSuppliedAssociations	transmembrane_proteins	484	2736	3089	17.6901	88.5724	10.7323	0	0.00102414	825-Oak|ABCB7|AQP|Ac3|Ac76E|Ac78C|Ace|Acsl|AlCR2|Ance-3|Aph-4|Ast-CC|Atpalpha|Baldspot|Buffy|CG10006|CG10219|CG10320|CG10550|CG10560|CG10738|CG10804|CG11035|CG11147|CG11353|CG11378|CG11592|CG11760|CG11786|CG1208|CG12268|CG12400|CG12484|CG12502|CG12519|CG12531|CG12541|CG12655|CG1275|CG12814|CG12858|CG12859|CG12935|CG12974|CG13024|CG13047|CG13049|CG13051|CG13066|CG13067|CG13068|CG13077|CG13116|CG13…
72vs30h APF log2FC>2	UserSuppliedAssociations	Mfuzz Cluster6	87	304	304	28.6184	100	9.19216	0	0.00102414	Ac78C|Buffy|CG10006|CG10237|CG10584|CG11029|CG11035|CG11050|CG11319|CG11400|CG11893|CG1208|CG13285|CG13309|CG13606|CG13794|CG14131|CG14196|CG15044|CG15202|CG1552|CG1640|CG17111|CG17323|CG1791|CG18635|CG1889|CG3009|CG3097|CG31077|CG31098|CG31974|CG3277|CG3344|CG34045|CG42235|CG42255|CG42397|CG42808|CG43394|CG43693|CG4721|CG5399|CG6830|CG6836|CG7079|CG7408|CG8083|CG8620|CG8785|CG9005|CG9372|CG9394|…
72vs30h APF log2FC>2	UserSuppliedAssociations	sarcomeric_proteins	29	76	77	38.1579	98.7013	5.2853	0	0.000666667	Act57B|Act79B|Act88F|Actn|CG14168|Ca-P60A|Chd64|FBgn0265045|FBgn0265991|Lmpt|Mf|Mhc|Mlc1|Mlc2|Mlp84B|Mp20|Rya-r44F|Tm1|Tm2|TpnC25D|TpnC4|TpnC47D|Unc-89|Zasp66|bt|fln|sals|sls|up
72vs30h APF log2FC>2	UserSuppliedAssociations	Mfuzz Cluster18	65	255	255	25.4902	100	6.83921	0	0.00102414	Act79B|Ance-3|CG10211|CG10264|CG10581|CG11409|CG12935|CG13003|CG13038|CG13188|CG13618|CG14218|CG14397|CG1441|CG14626|CG14866|CG15249|CG17691|CG17777|CG18641|CG2975|CG30458|CG31871|CG32645|CG32694|CG32855|CG34115|CG43287|CG43386|CG4497|CG5177|CG5188|CG5873|CG8927|CG9297|CG9514|CG9542|CG9737|CG9782|CG9850|CR42860|Cda5|ChLD3|Cht6|Cht7|Cpr47Ef|Cpr51A|Cpr62Bc|Cpr76Bd|Cpr92F|Cpr97Eb|Gasp|Gld|Msr-110|Os…
72vs30h APF log2FC>2	UserSuppliedAssociations	Mfuzz Cluster39	74	334	334	22.1557	100	5.93836	0	0.00102414	CG11044|CG11255|CG11447|CG11617|CG11722|CG12848|CG13865|CG14130|CG14222|CG14683|CG14757|CG15117|CG15456|CG15773|CG1636|CG1698|CG16985|CG17726|CG17776|CG1814|CG2010|CG2059|CG30116|CG3104|CG31100|CG33228|CG34150|CG34229|CG3608|CG42319|CG42376|CG4302|CG4404|CG4462|CG4882|CG5569|CG5793|CG5989|CG6673|CG7920|CG8067|CG8519|CG8993|CG9249|CR32160|CR43629|Cchl|FBgn0266758|Gapdh2|Mal-B2|Nipsnap|PGRP-LA|Pgm|…
72vs30h APF log2FC>2	UserSuppliedAssociations	WTvssalm_24hAPF_log2FC>2	19	49	49	38.7755	100	5.86149	0	0.00102414	Act88F|CG11044|CG14168|CG42319|CG43129|CG7378|CG9090|FBgn0265991|Gpo-1|Mal-B2|Mhc|Mlc1|Mlc2|Tm2|Tsp42Eg|Tsp42Eh|Unc-89|up|wupA
72vs30h APF log2FC>2	UserSuppliedAssociations	MitoExplorer_TCA_Cycle	13	28	29	46.4286	96.5517	5.6836	0	0.00102414	Acon|CG12091|CG5028|CG5214|CG6439|CG7430|Mdh2|Nc73EF|Scsalpha|kdn|l(1)G0156|l(1)G0255|skap
72vs30h APF log2FC>2	UserSuppliedAssociations	Mfuzz Cluster1	76	359	359	21.1699	100	5.57571	0	0.00102414	CG10175|CG12009|CG12164|CG12995|CG13028|CG13042|CG13284|CG13631|CG13643|CG13676|CG13720|CG13875|CG14257|CG14301|CG14304|CG14457|CG14515|CG14625|CG14892|CG14893|CG14946|CG15080|CG15414|CG15545|CG15615|CG15649|CG16786|CG16884|CG16885|CG16886|CG17127|CG2150|CG2663|CG30076|CG30101|CG30380|CG30427|CG30438|CG32036|CG32816|CG33299|CG34355|CG34382|CG34461|CG34462|CG3777|CG42331|CG42598|CG5928|CG6739|CG75…
72vs30h APF log2FC>2	UserSuppliedAssociations	Mfuzz Cluster30	46	186	186	24.7312	100	5.50223	0	0.00102414	Aph-4|CG11912|CG13024|CG13054|CG13067|CG13068|CG13272|CG13282|CG14529|CG14573|CG15506|CG1572|CG15887|CG16762|CG17298|CG17386|CG18417|CG18622|CG2816|CG31106|CG32266|CG34248|CG34284|CG34351|CG34447|CG5402|CG5644|CG6472|CG6834|CG7607|CG7888|CG8303|CG8483|CG9701|Cng|Cyp313b1|FBgn0265001|FBgn0265413|FBgn0267600|Grd|Ilp8|Tusp|Ubi-p5E|cln3|dys|mol
72vs30h APF log2FC>2	UserSuppliedAssociations	Mfuzz Cluster28	59	267	267	22.0974	100	5.26565	0	0.00102414	Acp1|CG1041|CG1136|CG11760|CG12520|CG13634|CG14270|CG14410|CG14636|CG14752|CG14881|CG15908|CG16820|CG16935|CG2003|CG31229|CG31648|CG33506|CG3420|CG34200|CG34250|CG34357|CG42322|CG4627|CG4957|CG5131|CG6847|CG7506|CG7777|CG8503|CcapR|Cralbp|Cyp12e1|Cyp301a1|Dhpr|ECSIT|EF-G2|ETHR|FBgn0267230|Fit2|Mlp84B|RIC-3|Rgk3|Scp1|alpha-Est10|clumsy|dyl|mRpL14|mRpL2|mRpL23|mRpL24|mRpL32|mRpL40|mRpL41|mRpL44|mRp…
72vs30h APF log2FC>2	UserSuppliedAssociations	MitoExplorer_Glycolysis	12	33	33	36.3636	100	4.37737	0	0.00102414	Ald|Eno|FBgn0267385|Gapdh1|Gapdh2|Hex-A|Pfk|Pgi|Pgk|Pglym78|Pgm|Tpi
72vs30h APF log2FC>2	UserSuppliedAssociations	MitoExplorer_Fatty_Acid_Metabolism	7	19	20	36.8421	95	3.38438	0.0034	0.00551803	CG1041|CG11407|CG12512|CG1774|CG3476|CG7920|CG8888
72vs30h APF log2FC>2	UserSuppliedAssociations	MitoExplorer_Pyruvate_Metabolism	7	21	24	33.3333	87.5	3.05963	0.0068	0.0106857	AcCoAS|CG11876|CG14290|CG5261|Men-b|T3dh|l(1)G0334
72vs30h APF log2FC>2	UserSuppliedAssociations	MitoExplorer_Amino_Acid_Metabolism	13	58	63	22.4138	92.0635	2.50918	0.0118	0.0182531	CG14997|CG1516|CG1640|CG17691|CG30022|CG5793|CG7433|CG7460|CG8745|Dhpr|Gdh|Gs2|slgA
72vs30h APF log2FC>2	UserSuppliedAssociations	MitoExplorer_Fe-S_Mfuzz Cluster_biosynthesis	4	12	15	33.3333	80	2.31206	0.039	0.0559565	CG13623|CG9836|l(1)G0136|mfrn
72vs30h APF log2FC>2	UserSuppliedAssociations	MitoExplorer_Fatty_Acid_Biosynthesis	4	12	12	33.3333	100	2.31206	0.0364	0.0537851	CG16985|CG16986|CG3961|v(2)k05816
72vs30h APF log2FC>2	UserSuppliedAssociations	Mfuzz Cluster37	77	513	513	15.0097	100	2.29449	0.029	0.0435	Amy-d|Amy-p|CG10300|CG10472|CG10514|CG10553|CG10560|CG10659|CG10827|CG11368|CG11878|CG12111|CG12158|CG12310|CG12506|CG13102|CG13323|CG13492|CG13810|CG14075|CG14125|CG14246|CG15067|CG15255|CG15515|CG16775|CG18493|CG18577|CG18628|CG30151|CG31198|CG31200|CG33110|CG33127|CG34172|CG34219|CG34301|CG3868|CG3906|CG5724|CG5778|CG5804|CG5867|CG6074|CG6484|CG7203|CG7542|CG7724|CG8562|CG9498|CG9649|CR42839|C…

## Sheet: WTvssalm down
Sample Gene Set	Ontology Type	Ontology Name(Ontology-ID)	Number Changed	Number Measured	Number in Ontology	Percent Changed	Percent Present	Z Score	PermuteP	AdjustedP	gene symbols
WTvssalm_1d adult_log2FC<-2	biological_process	alpha-amino acid catabolic process(GO:1901606)	5	26	29	19.2308	89.6552	2.98752	0.0206	0.998913	CG3999|CG6385|Hn|arg|v
WTvssalm_1d adult_log2FC<-2	biological_process	amine biosynthetic process(GO:0009309)	4	8	8	50	100	5.41603	0.0008	0.133645	Odc1|Odc2|SamDC|w
WTvssalm_1d adult_log2FC<-2	biological_process	aminoglycan metabolic process(GO:0006022)	18	119	146	15.1261	81.5068	4.4759	0.0002	0.0536606	Act57B|CG10140|CG14247|CG32302|CG42397|CG42728|CG4835|CG5883|CG6933|CG7298|Cht3|Cht4|Cht9|Idgf1|Idgf5|PGRP-SB1|PGRP-SB2|Tequila
WTvssalm_1d adult_log2FC<-2	biological_process	ammonium ion metabolic process(GO:0097164)	5	29	29	17.2414	100	2.69226	0.0364	1	CG2201|CG4335|Odc1|Odc2|SamDC
WTvssalm_1d adult_log2FC<-2	biological_process	antibacterial humoral response(GO:0019731)	9	26	28	34.6154	92.8571	6.38011	0	0.0536606	AttA|AttB|AttC|AttD|Def|Dpt|DptB|Dro|Mtk
WTvssalm_1d adult_log2FC<-2	biological_process	apical constriction(GO:0003383)	5	11	11	45.4545	100	5.70032	0.0002	0.0536606	mey|neo|nyo|os|tyn
WTvssalm_1d adult_log2FC<-2	biological_process	cellular calcium ion homeostasis(GO:0006874)	3	11	12	27.2727	91.6667	3.09438	0.0236	1	Ca-P60A|Cbp53E|FR
WTvssalm_1d adult_log2FC<-2	biological_process	cellular response to heat(GO:0034605)	5	20	24	25	83.3333	3.73491	0.0078	0.566075	TotA|TotB|TotC|TotM|TotZ
WTvssalm_1d adult_log2FC<-2	biological_process	cellular response to UV(GO:0034644)	4	9	11	44.4444	81.8182	5.02468	0.0022	0.270539	TotA|TotB|TotC|TotZ
WTvssalm_1d adult_log2FC<-2	biological_process	defense response to Gram-negative bacterium(GO:0050829)	10	32	35	31.25	91.4286	6.25667	0	0.0536606	AttA|CG13422|CG6168|Dpt|Dro|Listericin|Mtk|Pebp1|Sr-CI|edin
WTvssalm_1d adult_log2FC<-2	biological_process	defense response to Gram-positive bacterium(GO:0050830)	13	36	40	36.1111	90	7.89954	0	0.0536606	AttA|AttB|AttC|AttD|CG6639|Def|DptB|Dro|Listericin|Mtk|Pebp1|TotM|edin
WTvssalm_1d adult_log2FC<-2	biological_process	egg coat formation(GO:0035803)	4	13	14	30.7692	92.8571	3.90914	0.0062	0.503622	Vm26Aa|Vm26Ab|Vm26Ac|psd
WTvssalm_1d adult_log2FC<-2	biological_process	extracellular matrix assembly(GO:0085029)	4	13	14	30.7692	92.8571	3.90914	0.0062	0.503622	Vm26Aa|Vm26Ab|Vm26Ac|psd
WTvssalm_1d adult_log2FC<-2	biological_process	glycine metabolic process(GO:0006544)	3	9	10	33.3333	90	3.58433	0.0164	0.907535	CG3011|CG3999|CG6385
WTvssalm_1d adult_log2FC<-2	biological_process	intracellular protein transmembrane import(GO:0044743)	3	13	15	23.0769	86.6667	2.71046	0.0414	1	Fbp1|Tim17a1|Tim9a
WTvssalm_1d adult_log2FC<-2	biological_process	negative regulation of chromosome segregation(GO:0051985)	3	12	12	25	100	2.89189	0.0336	1	CycA|ald|mad2
WTvssalm_1d adult_log2FC<-2	biological_process	negative regulation of metaphase/anaphase transition of cell cycle(GO:1902100)	3	12	12	25	100	2.89189	0.0336	1	CycA|ald|mad2
WTvssalm_1d adult_log2FC<-2	biological_process	ornithine metabolic process(GO:0006591)	3	5	5	60	100	5.24712	0.0038	0.395826	Odc1|Odc2|arg
WTvssalm_1d adult_log2FC<-2	biological_process	paracrine signaling(GO:0038001)	3	3	3	100	100	7.05679	0.0004	0.0957189	os|upd2|upd3
WTvssalm_1d adult_log2FC<-2	biological_process	potassium ion transport(GO:0006813)	6	36	37	16.6667	97.2973	2.85149	0.0212	0.998913	CG3397|CG34396|CG42732|CG43155|Shab|Shaw
WTvssalm_1d adult_log2FC<-2	biological_process	proteolysis(GO:0006508)	53	567	663	9.34744	85.5204	3.8805	0.002	0.260412	Ance-3|Bace|CG10073|CG10232|CG11313|CG11459|CG11626|CG11836|CG11911|CG14820|CG16710|CG17684|CG18179|CG18563|CG18636|CG18735|CG2528|CG30002|CG30187|CG30288|CG3117|CG3239|CG33460|CG34290|CG42370|CG42694|CG43124|CG4408|CG4650|CG4721|CG4725|CG4793|CG4914|CG5246|CG6168|CG6639|CG7025|CG7573|CG7653|CG8550|CG8952|CG9416|CG9780|Damm|Jon66Cii|Prosbeta2R2|Rad23|Rpn12R|Rpt6R|Tequila|gd|skpE|stet
WTvssalm_1d adult_log2FC<-2	biological_process	reciprocal DNA recombination(GO:0035825)	4	21	23	19.0476	91.3043	2.64797	0.0382	1	c(3)G|mei-P22|rec|spn-D
WTvssalm_1d adult_log2FC<-2	biological_process	regulation of embryonic cell shape(GO:0016476)	6	29	30	20.6897	96.6667	3.49546	0.0092	0.646483	Mtl|mey|neo|nyo|os|tyn
WTvssalm_1d adult_log2FC<-2	biological_process	regulation of transposition(GO:0010528)	3	6	6	50	100	4.68995	0.0034	0.376295	BoYb|piwi|tej
WTvssalm_1d adult_log2FC<-2	biological_process	response to water(GO:0009415)	3	6	8	50	75	4.68995	0.0048	0.44736	Desi|TotA|nan
WTvssalm_1d adult_log2FC<-2	biological_process	sterol transport(GO:0015918)	3	8	10	37.5	80	3.88839	0.012	0.758914	Npc1b|Npc2d|Npc2g
WTvssalm_1d adult_log2FC<-2	cellular_component	axoneme part(GO:0044447)	3	12	15	25	80	2.89189	0.0358	1	CG9492|Sdic2|spag4
WTvssalm_1d adult_log2FC<-2	cellular_component	chorion(GO:0042600)	4	21	38	19.0476	55.2632	2.64797	0.0366	1	Muc4B|Mur11Da|Vm26Ac|psd
WTvssalm_1d adult_log2FC<-2	cellular_component	egg coat(GO:0035805)	4	6	6	66.6667	100	6.45374	0	0.0536606	Vm26Aa|Vm26Ab|Vm26Ac|psd
WTvssalm_1d adult_log2FC<-2	cellular_component	extracellular matrix(GO:0031012)	9	69	83	13.0435	83.1325	2.64987	0.028	1	CG31999|Muc4B|Mur11Da|Mur82C|TwdlM|mspo|nompA|os|prc
WTvssalm_1d adult_log2FC<-2	cellular_component	extracellular region(GO:0005576)	56	341	435	16.4223	78.3908	8.71552	0	0.0536606	AttA|AttB|AttC|AttD|CG10140|CG14247|CG30488|CG31286|CG31482|CG32302|CG42397|CG42728|CG4835|CG5883|CG6933|CG7298|CG8072|CG8100|Cht3|Cht4|Dh44|Dpt|DptB|Dro|IM1|Idgf1|Idgf5|Ilp3|Ilp5|Ilp6|ImpE2|ImpL1|Lsp1alpha|Lsp1beta|Lsp2|Mtk|NT1|Nplp2|Obp99b|PGRP-SB1|PGRP-SB2|Rfabg|Sgs4|Tequila|TotB|TotC|TotM|TotZ|dsx-c73A|edin|gd|lbm|nompA|os|spz6|upd3
WTvssalm_1d adult_log2FC<-2	cellular_component	extracellular space(GO:0005615)	24	192	306	12.5	62.7451	4.11956	0.0006	0.126486	AttA|AttB|AttC|CCHa2|CG12943|CG14259|CG17189|CG18067|CG30488|CG6168|Cht4|Cht9|Def|DptB|Nplp2|Spn77Bc|TotA|TotB|TotC|TotM|TotZ|edin|lectin-46Cb|os
WTvssalm_1d adult_log2FC<-2	cellular_component	integral component of plasma membrane(GO:0005887)	16	138	152	11.5942	90.7895	3.02014	0.0146	0.844892	CG2736|CG7227|GRHR|Oct-TyrR|Osi11|Osi12|Osi21|Osi6|Osi8|PGRP-SB1|PGRP-SB2|Snmp1|Sr-CI|Takr86C|kek1|w
WTvssalm_1d adult_log2FC<-2	cellular_component	larval serum protein complex(GO:0005616)	4	5	5	80	100	7.17916	0.0002	0.0536606	CG8100|Lsp1alpha|Lsp1beta|Lsp2
WTvssalm_1d adult_log2FC<-2	cellular_component	potassium channel complex(GO:0034705)	3	13	13	23.0769	100	2.71046	0.0454	1	CG3397|Shab|Shaw
WTvssalm_1d adult_log2FC<-2	molecular_function	carboxy-lyase activity(GO:0016831)	4	21	24	19.0476	87.5	2.64797	0.0432	1	Odc1|Odc2|SamDC|Tdc1
WTvssalm_1d adult_log2FC<-2	molecular_function	chitin binding(GO:0008061)	12	83	104	14.4578	79.8077	3.46721	0.0064	0.505943	CG10140|CG14247|CG32302|CG42397|CG42728|CG4835|CG5883|CG6933|CG7298|Cht3|Cht4|Tequila
WTvssalm_1d adult_log2FC<-2	molecular_function	chitinase activity(GO:0004568)	5	19	19	26.3158	100	3.88811	0.0056	0.495824	Cht3|Cht4|Cht9|Idgf1|Idgf5
WTvssalm_1d adult_log2FC<-2	molecular_function	cytokine activity(GO:0005125)	3	6	8	50	75	4.68995	0.0046	0.43794	CG17244|os|upd3
WTvssalm_1d adult_log2FC<-2	molecular_function	electron carrier activity(GO:0009055)	17	152	172	11.1842	88.3721	2.95189	0.014	0.837541	CG18193|CG43206|CG6870|Cyp12e1|Cyp28d2|Cyp304a1|Cyp309a1|Cyp309a2|Cyp4ac1|Cyp4d1|Cyp4g1|Cyp4p1|Cyp4p2|Cyp9h1|Cyt-b5-r|mex1|spok
WTvssalm_1d adult_log2FC<-2	molecular_function	glucuronosyltransferase activity(GO:0015020)	6	27	34	22.2222	79.4118	3.71685	0.0064	0.505943	Act57B|Ugt35a|Ugt37b1|Ugt37c1|Ugt86Dd|Ugt86Dj
WTvssalm_1d adult_log2FC<-2	molecular_function	glutathione transferase activity(GO:0004364)	6	35	36	17.1429	97.2222	2.93336	0.0194	0.998649	CG6662|GstD6|GstD8|GstD9|GstE2|Mgstl
WTvssalm_1d adult_log2FC<-2	molecular_function	growth factor receptor binding(GO:0070851)	4	19	19	21.0526	100	2.8963	0.0284	1	Idgf1|Idgf5|Pvf2|kek1
WTvssalm_1d adult_log2FC<-2	molecular_function	heme binding(GO:0020037)	17	121	138	14.0496	87.6812	3.99925	0.0008	0.133645	CG6870|Cyp12e1|Cyp28d2|Cyp304a1|Cyp309a1|Cyp309a2|Cyp4ac1|Cyp4d1|Cyp4g1|Cyp4p1|Cyp4p2|Cyp9h1|Cyt-b5-r|Hr51|Rfabg|spok|t-cup
WTvssalm_1d adult_log2FC<-2	molecular_function	insulin receptor binding(GO:0005158)	3	11	12	27.2727	91.6667	3.09438	0.028	1	Ilp3|Ilp5|Ilp6
WTvssalm_1d adult_log2FC<-2	molecular_function	iron ion binding(GO:0005506)	18	123	156	14.6341	78.8462	4.31433	0.0006	0.126486	CG31013|CG4335|Cyp12e1|Cyp28d2|Cyp304a1|Cyp309a1|Cyp309a2|Cyp4ac1|Cyp4d1|Cyp4g1|Cyp4p1|Cyp4p2|Cyp9h1|Cyt-b5-r|Hn|PH4alphaSG2|spok|v
WTvssalm_1d adult_log2FC<-2	molecular_function	nutrient reservoir activity(GO:0045735)	4	5	6	80	83.3333	7.17916	0	0.0536606	Fbp2|Lsp1alpha|Lsp1beta|Lsp2
WTvssalm_1d adult_log2FC<-2	molecular_function	organic acid binding(GO:0043177)	6	26	39	23.0769	66.6667	3.83567	0.0044	0.423452	CG31013|CG4335|CG6188|CG8129|PH4alphaSG2|Rfabg
WTvssalm_1d adult_log2FC<-2	molecular_function	oxidoreductase activity, acting on paired donors, with incorporation or reduction of molecular oxygen(GO:0016705)	17	134	167	12.6866	80.2395	3.52529	0.005	0.456392	CG31013|CG4335|Cyp12e1|Cyp28d2|Cyp304a1|Cyp309a1|Cyp309a2|Cyp4ac1|Cyp4d1|Cyp4g1|Cyp4p1|Cyp4p2|Cyp9h1|Cyt-b5-r|Hn|PH4alphaSG2|spok
WTvssalm_1d adult_log2FC<-2	molecular_function	oxygen transporter activity(GO:0005344)	5	8	8	62.5	100	6.94367	0	0.0536606	CG8100|Fbp1|Lsp1alpha|Lsp1beta|Lsp2
WTvssalm_1d adult_log2FC<-2	molecular_function	potassium channel activity(GO:0005267)	5	27	28	18.5185	96.4286	2.88452	0.0226	1	CG34396|CG42732|CG43155|Shab|Shaw
WTvssalm_1d adult_log2FC<-2	molecular_function	scavenger receptor activity(GO:0005044)	5	21	23	23.8095	91.3043	3.59147	0.0072	0.535704	CG2736|CG7227|Snmp1|Sr-CI|Tequila
WTvssalm_1d adult_log2FC<-2	molecular_function	serine-type endopeptidase activity(GO:0004252)	29	220	283	13.1818	77.7385	4.85773	0.0002	0.0536606	CG10232|CG11313|CG11836|CG11911|CG16710|CG18179|CG18563|CG18636|CG18735|CG2528|CG30002|CG30187|CG30288|CG3117|CG33460|CG34290|CG42694|CG43124|CG4650|CG4793|CG4914|CG5246|CG6639|CG8481|CG8952|Jon66Cii|Tequila|gd|stet
WTvssalm_1d adult_log2FC<-2	molecular_function	serine-type endopeptidase inhibitor activity(GO:0004867)	8	52	81	15.3846	64.1975	3.02949	0.0132	0.806019	CG16704|CG16713|CG31778|CG43366|Spn100A|Spn43Aa|Spn77Bc|Spn88Eb
WTvssalm_1d adult_log2FC<-2	molecular_function	structural constituent of chitin-based cuticle(GO:0005214)	15	107	139	14.0187	76.9784	3.74424	0.0028	0.330549	CG15020|CG34461|Cpr12A|Cpr31A|Cpr47Ee|Cpr49Ab|Cpr49Ac|Cpr65Ea|Cpr66Cb|Cpr72Ea|Cpr92F|Cry|Edg91|TwdlM|dsx-c73A
WTvssalm_1d adult_log2FC<-2	molecular_function	structural constituent of egg coat(GO:0035804)	3	5	6	60	83.3333	5.24712	0.0008	0.133645	Vm26Aa|Vm26Ab|Vm26Ac
WTvssalm_1d adult_log2FC<-2	molecular_function	structural constituent of muscle(GO:0008307)	3	14	14	21.4286	100	2.54635	0.0488	1	Mlp84B|Scgalpha|Scgdelta
WTvssalm_1d adult_log2FC<-2	UserSuppliedAssociations	Mfuzz Cluster1	33	359	359	9.1922	100	2.12852	0.029	0.0638	CG11380|CG13358|CG13737|CG14052|CG14515|CG14770|CG2150|CG30076|CG30101|CG33299|CG34221|CG34382|CG34461|CG5225|CG6272|CG7031|CG8331|Cpr66Cb|Desi|FBgn0266724|Hr46|Osi12|Osi6|RpL10|RpL39|TTLL3A|Tim9a|Tsp68C|Yp2|msta|nau|pip|sr
WTvssalm_1d adult_log2FC<-2	UserSuppliedAssociations	Mfuzz Cluster12	62	317	317	19.5584	100	9.5937	0	0.000761538	CG10799|CG11093|CG13053|CG13905|CG13962|CG1468|CG15168|CG15345|CG16704|CG17562|CG17684|CG17760|CG18636|CG2233|CG31142|CG31778|CG32182|CG32219|CG32241|CG32532|CG33120|CG33252|CG34163|CG34206|CG34247|CG42694|CG42787|CG42792|CG43060|CG43071|CG43085|CG43133|CG43144|CG43273|CG4335|CG4398|CG4650|CG5036|CG7227|CG8129|CG9837|CG9989|CR30009|CR32658|CR43685|FBgn0267112|Ilp3|Nca|Rad23|Rh7|Rpb11|SamDC|Srp9|T…
WTvssalm_1d adult_log2FC<-2	UserSuppliedAssociations	Mfuzz Cluster15	51	194	194	26.2887	100	11.309	0	0.000761538	AttD|CCHa2|CG10621|CG11370|CG11459|CG11920|CG11985|CG12129|CG13607|CG14135|CG15369|CG16926|CG17244|CG18446|CG2082|CG30008|CG31337|CG31606|CG31636|CG3397|CG3709|CG42370|CG4269|CG43114|CG4408|CG4500|CG5142|CG6188|CG6385|CG6639|CG6660|CG8100|CG8791|Cyp304a1|Cyp309a1|Cyp309a2|Cyp4d1|FBgn0267113|Fbp1|Fbp2|Ilp6|Jhe|Lsp1alpha|Lsp1beta|LysX|Obp99b|Spn88Eb|Tsp42Ek|Tsp42Ep|dro5|edin
WTvssalm_1d adult_log2FC<-2	UserSuppliedAssociations	Mfuzz Cluster17	71	530	530	13.3962	100	6.62145	0	0.000761538	CG10013|CG10801|CG12681|CG12684|CG13244|CG13337|CG13526|CG14269|CG15278|CG15472|CG15719|CG15734|CG16781|CG17173|CG18193|CG18558|CG2528|CG30401|CG30429|CG31013|CG31050|CG3117|CG31526|CG31709|CG31776|CG32263|CG32371|CG32847|CG33125|CG33136|CG33223|CG33235|CG34170|CG42288|CG42523|CG43206|CG43209|CG43277|CG43293|CG43329|CG4480|CG5194|CG5755|CG6405|CG7573|CG8072|CG9406|CG9592|CR33218|CR33319|CR43306|F…
WTvssalm_1d adult_log2FC<-2	UserSuppliedAssociations	Mfuzz Cluster2	35	270	270	12.963	100	4.3851	0	0.000761538	Atg12|BoYb|CG13137|CG15394|CG15730|CG17681|CG18649|CG30002|CG31286|CG31482|CG33260|CG7213|CG8550|CR41440|CR41443|CR43640|CR43656|CR43830|CR43844|CR43975|Dh44|FBgn0265145|FBgn0265958|FBgn0265997|FBgn0266069|FBgn0266972|Grip75|Lip2|Takr86C|Vm26Aa|coil|piwi|psd|skpE|tj
WTvssalm_1d adult_log2FC<-2	UserSuppliedAssociations	Mfuzz Cluster27	28	275	275	10.1818	100	2.53116	0.009	0.0217317	Abd-B|CG11905|CG12112|CG13936|CG14050|CG1667|CG16734|CG30051|CG30187|CG31111|CG32791|CG33107|CG33977|CG42254|CG43062|CG5708|CG7637|CG9021|CG9669|CG9760|CycA|Fancl|GstD6|Pka-C3|Spc105R|c(3)G|mad2|mei-P22
WTvssalm_1d adult_log2FC<-2	UserSuppliedAssociations	Mfuzz Cluster31	48	308	308	15.5844	100	6.58352	0	0.000761538	AGO3|AttA|AttB|CG10140|CG10182|CG12868|CG17193|CG1850|CG31076|CG31955|CG32368|CG33460|CG33494|CG34244|CG42728|CG43064|CG43166|CG43179|CG43351|CG43402|CG4757|CG4950|CG6357|CG6967|CG9338|CG9870|Cpr12A|Cpr31A|Cpr47Ee|Cpr72Ea|Cyp9h1|Def|Dpt|DptB|Dro|FBgn0264775|FBgn0266124|FBgn0266851|FBgn0267195|Klp54D|Lamp1|Lsp2|Mtk|PGRP-SB1|Rfabg|TotA|arg|tej
WTvssalm_1d adult_log2FC<-2	UserSuppliedAssociations	Mfuzz Cluster34	22	223	223	9.86547	100	2.08095	0.0366	0.0754875	CG10307|CG13081|CG15888|CG17322|CG32333|CG42587|CG5612|FBgn0264753|FBgn0266446|Mtl|Ndg|Neurochondrin|Obp99c|Osi11|Osi21|RhoGAP102A|betaTub60D|cher|dsx-c73A|hb|shakB|spz6
WTvssalm_1d adult_log2FC<-2	UserSuppliedAssociations	IFM 72vs30_log2FC<-2	176	1177	1177	14.9533	100	12.4106	0	0.000761538	Ama|AttA|AttB|AttC|AttD|B-H2|CCHa2|CG10621|CG10793|CG10801|CG11370|CG11459|CG11835|CG11920|CG12592|CG12684|CG1273|CG12866|CG13023|CG13053|CG13081|CG13137|CG13244|CG13358|CG13526|CG13597|CG13905|CG14205|CG14840|CG15083|CG15263|CG15719|CG15734|CG15905|CG16710|CG16965|CG17108|CG17173|CG17181|CG17322|CG17562|CG17738|CG18193|CG18446|CG1850|CG18563|CG18636|CG18649|CG18735|CG2861|CG30385|CG30401|CG30429…
WTvssalm_24hAPF_log2FC<-2	biological_process	signal transduction(GO:0007165)	3	898	961	0.334076	93.4443	3.13086	0.0186	1	5-HT2|CG34357|CG3837
WTvssalm_24hAPF_log2FC<-2	cellular_component	integral component of membrane(GO:0016021)	3	928	1125	0.323276	82.4889	3.05754	0.0208	1	5-HT2|Ir68a|w
WTvssalm_24hAPF_log2FC<-2	cellular_component	membrane(GO:0016020)	4	1120	1284	0.357143	87.2274	3.84947	0.0058	1	5-HT2|CG3837|Ir68a|w
WTvssalm_24hAPF_log2FC<-2	molecular_function	ATP binding(GO:0005524)	3	655	692	0.458015	94.6532	3.87807	0.0092	1	CG34357|CG3837|w
WTvssalm_24hAPF_log2FC<-2	molecular_function	transmembrane signaling receptor activity(GO:0004888)	4	242	343	1.65289	70.5539	9.41301	0	0.70832	5-HT2|CG3837|Ir68a|w
WTvssalm_24hAPF_log2FC<-2	UserSuppliedAssociations	transmembrane_proteins	5	2736	3089	0.182749	88.5724	2.54412	0.022	0.4356	5-HT2|CG13047|CG34357|Ir68a|w
WTvssalm_30hAPF_log2FC<-2	biological_process	cellular response to heat(GO:0034605)	3	20	24	15	83.3333	3.67951	0.0266	1	Hsp70Ab|Hsp70Bb|TotA
WTvssalm_30hAPF_log2FC<-2	biological_process	cellular response to oxygen-containing compound(GO:1901701)	3	20	25	15	80	3.67951	0.0344	1	AlCR2|rl|star1
WTvssalm_30hAPF_log2FC<-2	biological_process	detection of chemical stimulus(GO:0009593)	4	39	104	10.2564	37.5	3.20598	0.0448	1	Ir11a|Ir31a|Ir87a|Or67b
WTvssalm_30hAPF_log2FC<-2	biological_process	Malpighian tubule tip cell differentiation(GO:0061382)	3	8	9	37.5	88.8889	6.48064	0.0032	1	ac|ase|sc
WTvssalm_30hAPF_log2FC<-2	biological_process	metamorphosis(GO:0007552)	7	31	34	22.5806	91.1765	7.34231	0	1	Eig71Ea|Eig71Ec|Eig71Ej|Eig71Ek|Phk-3|Pten|rl
WTvssalm_30hAPF_log2FC<-2	biological_process	response to bacterium(GO:0009617)	11	113	129	9.73451	87.5969	5.11348	0.0022	1	Eig71Ea|Eig71Eb|Eig71Ec|Eig71Ed|Eig71Ef|Eig71Eg|Eig71Ej|Eig71Ek|Phk-3|TotA|wntD
WTvssalm_30hAPF_log2FC<-2	cellular_component	extracellular region(GO:0005576)	23	341	435	6.74487	78.3908	5.32123	0.0016	1	Acp29AB|Actbeta|CG11570|CG34049|CG34426|CG43294|CG8100|Eig71Ea|Eig71Eb|Eig71Ec|Eig71Ed|Eig71Ef|Eig71Eg|Eig71Ej|Eig71Ek|PGRP-SB2|Rfabg|beat-IIb|beat-Va|cals|etaTry|tsg|wntD
WTvssalm_30hAPF_log2FC<-2	cellular_component	integral component of plasma membrane(GO:0005887)	9	138	152	6.52174	90.7895	3.17776	0.0448	1	BicC|CG8784|Osi18|Osi19|Osi20|PGRP-SB2|cals|kek4|nAcRbeta-96A
WTvssalm_30hAPF_log2FC<-2	molecular_function	G-protein coupled receptor activity(GO:0004930)	9	125	171	7.2	73.0994	3.52041	0.0298	1	5-HT2|AlCR2|CG8784|Gr66a|Rh7|mthl11|mthl14|mthl7|star1
WTvssalm_30hAPF_log2FC<-2	molecular_function	glutathione transferase activity(GO:0004364)	4	35	36	11.4286	97.2222	3.48988	0.0314	1	GstD10|GstD4|GstD6|GstD7
WTvssalm_30hAPF_log2FC<-2	molecular_function	serine-type endopeptidase activity(GO:0004252)	14	220	283	6.36364	77.7385	3.87436	0.0204	1	CG11529|CG11668|CG18636|CG30288|CG33226|CG33460|CG33461|CG33465|CG34290|CG34436|CG42694|CG4650|CG9737|etaTry
WTvssalm_30hAPF_log2FC<-2	molecular_function	serine-type endopeptidase inhibitor activity(GO:0004867)	5	52	81	9.61538	64.1975	3.40191	0.0278	1	CG31778|CG34454|CG42538|CG42827|m1
WTvssalm_30hAPF_log2FC<-2	UserSuppliedAssociations	Mfuzz Cluster12	95	317	317	29.9685	100	25.4353	0	0.00099	ARY|Actbeta|CG11362|CG14316|CG14362|CG14556|CG15169|CG16964|CG17177|CG17374|CG17760|CG18063|CG18636|CG30325|CG31174|CG31287|CG31600|CG31778|CG31804|CG31909|CG32061|CG32141|CG32192|CG32219|CG32228|CG32259|CG32640|CG32652|CG32718|CG33252|CG33309|CG33310|CG33667|CG34107|CG34204|CG34206|CG34245|CG34258|CG34274|CG34292|CG40498|CG42263|CG42393|CG42446|CG42448|CG42535|CG42536|CG42691|CG42692|CG42694|CG4…
WTvssalm_30hAPF_log2FC<-2	UserSuppliedAssociations	Mfuzz Cluster27	16	275	275	5.81818	100	1.97499	0.047	0.0969375	CG17977|CG30466|CG32641|CG33977|CG43647|CR43785|FBgn0264821|GstD6|GstD7|Lasp|Nipped-A|Pten|Zyx|ci|pncr013:4|rl
WTvssalm_30hAPF_log2FC<-2	UserSuppliedAssociations	Mfuzz Cluster31	71	308	308	23.0519	100	18.4843	0	0.00099	AGO3|CG11570|CG2219|CG30026|CG30472|CG31076|CG31370|CG31955|CG32017|CG32115|CG33460|CG33494|CG33690|CG33773|CG34173|CG42493|CG42590|CG42711|CG42763|CG42778|CG42798|CG42867|CG43054|CG43127|CG43132|CG43139|CG43179|CG43235|CG43294|CG43396|CG43448|CG43760|CG43851|CG4757|CG5656|CG8784|CR42746|CR43356|CR43734|CR43973|Cpr72Eb|Eig71Ea|Eig71Ec|Eig71Ed|Eig71Ej|Eig71Ek|FBgn0264882|FBgn0264899|FBgn0265341|FB…
WTvssalm_72hAPF_log2FC<-2	biological_process	adult walking behavior(GO:0007628)	3	9	9	33.3333	100	4.96768	0.007	0.688644	ey|oc|sim
WTvssalm_72hAPF_log2FC<-2	biological_process	cellular response to UV(GO:0034644)	5	9	11	55.5556	81.8182	8.65413	0	0.0553375	Rh3|TotA|TotB|ninaB|ninaC
WTvssalm_72hAPF_log2FC<-2	biological_process	detection of UV(GO:0009589)	3	5	5	60	100	6.99855	0.0014	0.217467	Rh3|ninaB|ninaC
WTvssalm_72hAPF_log2FC<-2	biological_process	female mating behavior(GO:0060180)	5	21	26	23.8095	80.7692	5.17802	0.0026	0.343588	Acp36DE|Acp70A|CG9997|Ilp2|Ilp3
WTvssalm_72hAPF_log2FC<-2	biological_process	G-protein coupled receptor signaling pathway(GO:0007186)	20	172	189	11.6279	91.0053	6.02528	0	0.0553375	CG13995|CG17760|Dh44|Dh44-R1|DopEcR|Dsk|Fmrf|GABA-B-R1|IFa|Pk1r|Rh2|Rh3|Rh5|Rh7|TrissinR|boss|hec|inaC|inaF-D|mGluRA
WTvssalm_72hAPF_log2FC<-2	biological_process	ion transport(GO:0006811)	22	339	384	6.48968	88.2812	3.21171	0.0342	1	CG15719|CG31105|CG3397|CG3822|CG8546|CG8713|CG8916|CG9935|Eaat2|HisCl1|Lcch3|Rdl|Task7|VGAT|VhaM9.7-a|gfA|nAcRalpha-30D|nAcRalpha-96Aa|nAcRbeta-64B|nAcRbeta-96A|nrv3|ort
WTvssalm_72hAPF_log2FC<-2	biological_process	multicellular organism reproduction(GO:0032504)	22	93	177	23.6559	52.5424	10.8541	0	0.0553375	Acp29AB|Acp36DE|Acp53C14a|Acp53Ea|Acp63F|Acp70A|BG642163|BG642167|CG14061|CG17843|CG30488|CG31659|CG34130|CG6071|CG6168|CG9997|LysC|Mst57Db|Obp56i|Sfp53D|lectin-30A|msopa
WTvssalm_72hAPF_log2FC<-2	biological_process	neurotransmitter transport(GO:0006836)	9	104	120	8.65385	86.6667	2.98388	0.0342	1	CG1732|CG33296|CG8850|Caps|Frq1|Rab3|Snap25|Sytalpha|cpx
WTvssalm_72hAPF_log2FC<-2	biological_process	post-mating behavior(GO:0045297)	4	5	9	80	55.5556	9.471	0	0.0553375	Acp29AB|Acp36DE|Acp70A|Mst57Db
WTvssalm_72hAPF_log2FC<-2	biological_process	protein-chromophore linkage(GO:0018298)	4	7	7	57.1429	100	7.86366	0	0.0553375	Rh2|Rh3|Rh5|Rh7
WTvssalm_72hAPF_log2FC<-2	biological_process	response to organic substance(GO:0010033)	8	83	109	9.63855	76.1468	3.16075	0.0314	1	DopEcR|Hsp67Bc|Orco|Rdl|TotA|boss|inaC|ort
WTvssalm_72hAPF_log2FC<-2	biological_process	response to temperature stimulus(GO:0009266)	9	100	108	9	92.5926	3.11763	0.0246	1	CG32640|CG32641|HisCl1|Hsp67Ba|Hsp67Bc|Hsp70Bb|TotA|TotB|ort
WTvssalm_72hAPF_log2FC<-2	biological_process	response to toxic substance(GO:0009636)	3	16	16	18.75	100	3.39912	0.0276	1	Rdl|nAcRalpha-30D|ort
WTvssalm_72hAPF_log2FC<-2	biological_process	sensory perception of chemical stimulus(GO:0007606)	11	101	242	10.8911	41.7355	4.18915	0.005	0.539878	Obp44a|Obp56i|Or94a|Orco|a10|dpr16|dpr18|dpr2|dpr4|dpr6|dpr7
WTvssalm_72hAPF_log2FC<-2	biological_process	sensory perception of light stimulus(GO:0050953)	5	14	15	35.7143	93.3333	6.69008	0.0002	0.0553375	Rh2|Rh3|Rh5|Rh7|boss
WTvssalm_72hAPF_log2FC<-2	biological_process	sperm displacement(GO:0007321)	3	3	3	100	100	9.25043	0.0006	0.1398	Acp29AB|Acp36DE|Acp53Ea
WTvssalm_72hAPF_log2FC<-2	cellular_component	acetylcholine-gated channel complex(GO:0005892)	5	8	10	62.5	80	9.24486	0	0.0553375	gfA|nAcRalpha-30D|nAcRalpha-96Aa|nAcRbeta-64B|nAcRbeta-96A
WTvssalm_72hAPF_log2FC<-2	cellular_component	chloride channel complex(GO:0034707)	4	11	13	36.3636	84.6154	6.04833	0.0008	0.168648	HisCl1|Lcch3|Rdl|ort
WTvssalm_72hAPF_log2FC<-2	cellular_component	dendrite(GO:0030425)	4	31	36	12.9032	86.1111	2.93284	0.0448	1	Cdk5alpha|Orco|Rdl|gfA
WTvssalm_72hAPF_log2FC<-2	cellular_component	extracellular region(GO:0005576)	27	341	435	7.91789	78.3908	4.70479	0.0012	0.204323	Acp29AB|Acp36DE|Acp53Ea|Acp70A|Actbeta|CG30488|CG31609|CG34049|CG7166|Dh44|Gpb5|IM1|IM3|Ilp2|Ilp3|Lcp65Ag1|Lsp2|Mst57Db|ST6Gal|TotB|beat-IIa|beat-IIb|beat-Ib|beat-Va|beat-Vb|miple|tsg
WTvssalm_72hAPF_log2FC<-2	cellular_component	extracellular space(GO:0005615)	27	192	306	14.0625	62.7451	8.25525	0	0.0553375	Acp29AB|Acp36DE|Acp53C14a|Acp53Ea|Acp63F|Acp70A|BG642163|BG642167|CG14061|CG14258|CG14259|CG17843|CG30488|CG31189|CG31659|CG34130|CG6071|CG6168|CG9997|LysC|Mst57Db|Obp56i|Sfp53D|TotA|TotB|lectin-30A|msopa
WTvssalm_72hAPF_log2FC<-2	cellular_component	inaD signaling complex(GO:0016027)	3	9	10	33.3333	90	4.96768	0.004	0.466	inaC|inaD|ninaC
WTvssalm_72hAPF_log2FC<-2	cellular_component	postsynaptic membrane(GO:0045211)	11	27	30	40.7407	90	10.7423	0	0.0553375	CG1909|CG8916|HisCl1|Lcch3|Rdl|gfA|nAcRalpha-30D|nAcRalpha-96Aa|nAcRbeta-64B|nAcRbeta-96A|ort
WTvssalm_72hAPF_log2FC<-2	cellular_component	procollagen-proline 4-dioxygenase complex(GO:0016222)	3	9	17	33.3333	52.9412	4.96768	0.0064	0.643927	CG15539|PH4alphaMP|PH4alphaNE3
WTvssalm_72hAPF_log2FC<-2	cellular_component	rhabdomere(GO:0016028)	5	21	26	23.8095	80.7692	5.17802	0.0014	0.217467	Rh5|inaC|inaD|ninaC|rtp
WTvssalm_72hAPF_log2FC<-2	molecular_function	acetylcholine-activated cation-selective channel activity(GO:0004889)	5	8	10	62.5	80	9.24486	0	0.0553375	gfA|nAcRalpha-30D|nAcRalpha-96Aa|nAcRbeta-64B|nAcRbeta-96A
WTvssalm_72hAPF_log2FC<-2	molecular_function	cation(GO:0005416)	4	13	13	30.7692	100	5.46028	0.0016	0.240108	CG1732|CG8850|Eaat2|VGAT
WTvssalm_72hAPF_log2FC<-2	molecular_function	G-protein coupled photoreceptor activity(GO:0008020)	4	8	8	50	100	7.28992	0.0002	0.0553375	Rh2|Rh3|Rh5|Rh7
WTvssalm_72hAPF_log2FC<-2	molecular_function	GABA-A receptor activity(GO:0004890)	3	3	3	100	100	9.25043	0	0.0553375	CG8916|Lcch3|Rdl
WTvssalm_72hAPF_log2FC<-2	molecular_function	growth factor activity(GO:0008083)	4	29	30	13.7931	96.6667	3.10163	0.0336	1	Actbeta|Ccn|daw|miple
WTvssalm_72hAPF_log2FC<-2	molecular_function	guanylate cyclase activity(GO:0004383)	3	11	14	27.2727	78.5714	4.3809	0.0112	0.8854	CG3216|CG34357|CG3618
WTvssalm_72hAPF_log2FC<-2	molecular_function	hormone activity(GO:0005179)	12	46	55	26.087	83.6364	8.52896	0	0.0553375	Acp29AB|Acp36DE|Acp53Ea|Acp70A|Dh44|Dh44-R1|Dsk|Fmrf|Gpb5|IFa|Ilp2|Ilp3
WTvssalm_72hAPF_log2FC<-2	molecular_function	monosaccharide binding(GO:0048029)	7	28	46	25	60.8696	6.32983	0	0.0553375	Acp29AB|CG15539|CG18233|CG8343|PH4alphaMP|PH4alphaNE3|lectin-30A
WTvssalm_72hAPF_log2FC<-2	molecular_function	neurotransmitter receptor activity(GO:0030594)	6	50	54	12	92.5926	3.37438	0.0198	1	CG13995|Dh44-R1|Pk1r|Rdl|TrissinR|hec
WTvssalm_72hAPF_log2FC<-2	molecular_function	neurotransmitter transporter activity(GO:0005326)	4	24	27	16.6667	88.8889	3.59993	0.0172	1	CG1732|CG33296|CG8850|cpx
WTvssalm_72hAPF_log2FC<-2	molecular_function	odorant binding(GO:0005549)	5	37	115	13.5135	32.1739	3.41065	0.0274	1	Obp44a|Obp56i|Or94a|Orco|a10
WTvssalm_72hAPF_log2FC<-2	molecular_function	organic acid binding(GO:0043177)	6	26	39	23.0769	66.6667	5.55627	0.0014	0.217467	CG15539|CG18233|CG8129|PH4alphaMP|PH4alphaNE3|mGluRA
WTvssalm_72hAPF_log2FC<-2	molecular_function	oxidoreductase activity, acting on single donors with incorporation of molecular oxygen, incorporation of two atoms of oxygen(GO:0016702)	5	20	33	25	60.6061	5.34754	0.001	0.184458	CG15539|CG18233|PH4alphaMP|PH4alphaNE3|ninaB
WTvssalm_72hAPF_log2FC<-2	molecular_function	peptidyl-proline dioxygenase activity(GO:0031543)	4	14	27	28.5714	51.8519	5.21184	0.0032	0.393511	CG15539|CG18233|PH4alphaMP|PH4alphaNE3
WTvssalm_72hAPF_log2FC<-2	molecular_function	sodium ion transmembrane transporter activity(GO:0015081)	10	100	124	10	80.6452	3.67314	0.0092	0.839761	CG1732|CG31105|CG33296|CG6723|CG8546|CG8850|CG9657|Eaat2|VGAT|nrv3
WTvssalm_72hAPF_log2FC<-2	UserSuppliedAssociations	Mfuzz Cluster12	96	317	317	30.2839	100	22.4899	0	0.000825	Actbeta|CG13056|CG13962|CG14316|CG14321|CG14362|CG15478|CG16704|CG17177|CG17341|CG17684|CG17760|CG18063|CG30325|CG31174|CG31287|CG31525|CG31609|CG32055|CG32061|CG32192|CG32219|CG32228|CG32588|CG32640|CG32652|CG32718|CG33252|CG33667|CG34107|CG34204|CG34206|CG34247|CG34258|CG40498|CG42263|CG42393|CG42448|CG42535|CG42694|CG43049|CG43050|CG43059|CG43060|CG43076|CG43100|CG43133|CG43237|CG43290|CG43292…
WTvssalm_72hAPF_log2FC<-2	UserSuppliedAssociations	Mfuzz Cluster17	54	530	530	10.1887	100	6.4898	0	0.000825	CG10752|CG10801|CG10834|CG10909|CG1138|CG12078|CG12464|CG12684|CG13526|CG13829|CG1421|CG14983|CG15403|CG15719|CG17195|CG17744|CG18193|CG30429|CG30447|CG31526|CG31601|CG31807|CG31816|CG32148|CG32232|CG32655|CG32720|CG34021|CG34029|CG34161|CG34170|CG42650|CG42659|CG42853|CG43069|CG43077|CG43110|CG43209|CG43638|CG4480|CG5755|CG8245|CG9592|CR32690|CR43845|FBgn0264980|FBgn0266962|FBgn0267253|Fer1|Mst3…
WTvssalm_72hAPF_log2FC<-2	UserSuppliedAssociations	Mfuzz Cluster2	34	270	270	12.5926	100	6.51451	0	0.000825	Acp36DE|CG12950|CG14072|CG17018|CG18545|CG18649|CG32603|CG33260|CG3347|CG3618|CG3822|CG43098|CG5281|CR41443|CR42545|CR42836|CR42875|CR43264|CR43431|CR43475|CR43975|Dh44|FBgn0265039|FBgn0265458|FBgn0265546|FBgn0265801|FBgn0265964|FBgn0266595|FBgn0266957|FBgn0266978|FBgn0267123|FBgn0267604|Lip2|fd102C
WTvssalm_72hAPF_log2FC<-2	UserSuppliedAssociations	Mfuzz Cluster26	15	193	193	7.77202	100	2.22908	0.0306	0.0618245	CG13071|CG13217|CG18367|CG8757|Cpn|FBgn0267435|Hn|Rh3|Rh5|inaC|inaD|ninaC|pncr008:3L|prom|rtp
WTvssalm_72hAPF_log2FC<-2	UserSuppliedAssociations	Mfuzz Cluster31	48	308	308	15.5844	100	9.53744	0	0.000825	CG11458|CG17193|CG30075|CG30472|CG31955|CG32017|CG33494|CG34030|CG34244|CG34362|CG40178|CG42596|CG42711|CG42763|CG42778|CG43064|CG43120|CG43179|CG43246|CG43396|CG7646|CG7695|CR43283|CR43639|Cpr49Ag|Cyp6t2Psi|FBgn0264794|FBgn0265376|FBgn0265530|FBgn0266251|FBgn0266429|FBgn0266681|FBgn0266958|FBgn0267028|FBgn0267213|FBgn0267431|FBgn0267672|Lcp65Ag1|Lsp2|PHDP|Rpb12|TotA|bru-3|dpr7|fne|pncr002:3R|scr…
WTvssalm_72hAPF_log2FC<-2	UserSuppliedAssociations	Mfuzz Cluster35	21	241	241	8.71369	100	3.209	0.0022	0.005445	CG12269|CG12913|CG13404|CG13995|CG1537|CG1545|CG1732|CG2993|CG32052|CG42613|DopEcR|Rab3|Rdl|VGAT|VhaM9.7-a|alrm|dpr18|dpr4|igl|nAcRbeta-64B|noe
WTvssalm_72hAPF_log2FC<-2	UserSuppliedAssociations	Mfuzz Cluster36	42	234	234	17.9487	100	10.0536	0	0.000825	CG13108|CG13650|CG14010|CG14853|CG30172|CG31191|CG32204|CG34391|CG42339|CG42402|CG4409|CG4596|CG5890|CG8248|Ccn|Cdk5alpha|Drep-4|Eaat2|FBgn0267252|FBgn0267428|Frq1|GABA-B-R1|Glu-RI|Gpb5|Lcch3|Lip4|Obp44a|Task7|Teh1|beat-IIa|beat-IIb|beat-Ib|beat-Va|beat-Vb|dpr2|dpr6|gfA|mGluRA|nAcRalpha-30D|nAcRalpha-96Aa|nAcRbeta-96A|nrv3
WTvssalm_72hAPF_log2FC<-2	UserSuppliedAssociations	IFM 72vs30_log2FC<-2	104	1177	1177	8.83602	100	7.57938	0	0.000825	AlkB|CG10752|CG10801|CG10909|CG11842|CG12078|CG12592|CG12684|CG13022|CG13056|CG13305|CG13526|CG13829|CG1421|CG14915|CG14983|CG15023|CG15083|CG15478|CG15719|CG17018|CG17195|CG17322|CG17744|CG17843|CG18193|CG18545|CG18649|CG30429|CG30447|CG31337|CG31525|CG31606|CG31807|CG32055|CG32232|CG32588|CG32720|CG3347|CG34021|CG34029|CG34213|CG34247|CG42694|CG42763|CG42853|CG43059|CG43060|CG43062|CG43069|CG43…

## Sheet: WTvssalm up
Sample Gene Set	Ontology Type	Ontology Name(Ontology-ID)	Number Changed	Number Measured	Number in Ontology	Percent Changed	Percent Present	Z Score	PermuteP	AdjustedP	gene symbols
WTvssalm_1d adult_log2FC>2	biological_process	alditol phosphate metabolic process(GO:0052646)	3	12	12	25	100	4.10945	0.0066	0.175485	CG4825|Gpdh|Gpo-1
WTvssalm_1d adult_log2FC>2	molecular_function	antioxidant activity(GO:0016209)	4	36	39	11.1111	92.3077	2.53816	0.0308	0.575323	CG12896|GstS1|Prx2540-1|Sod2
WTvssalm_1d adult_log2FC>2	molecular_function	antiporter activity(GO:0015297)	3	25	27	12	92.5926	2.35853	0.0432	0.665205	CG1907|colt|sesB
WTvssalm_1d adult_log2FC>2	biological_process	ATP synthesis coupled proton transport(GO:0015986)	13	21	21	61.9048	100	14.7432	0	0.00769913	ATPsyn-Cf6|ATPsyn-b|ATPsyn-d|ATPsyn-gamma|CG1746|CG3321|Oscp|blw|l(1)G0230|l(2)06225|mt:ATPase6|mt:ATPase8|sun
WTvssalm_1d adult_log2FC>2	molecular_function	cofactor binding(GO:0048037)	21	175	188	12	93.0851	6.28766	0	0.00769913	Alas|CG5028|CG5703|CG6020|CG6439|CG7277|CG7430|CG8745|CG9140|CG9172|Gapdh1|GlyP|Gpdh|Nc73EF|Scsalpha|SdhA|Sirt4|amd|l(1)G0156|mtacp1|ninaG
WTvssalm_1d adult_log2FC>2	molecular_function	copper ion binding(GO:0005507)	3	22	22	13.6364	100	2.63446	0.0308	0.575323	CG3759|Scox|lox2
WTvssalm_1d adult_log2FC>2	biological_process	cytochrome complex assembly(GO:0017004)	5	12	12	41.6667	100	7.28443	0	0.00769913	CG6404|CG7598|Cchl|Scox|Surf1
WTvssalm_1d adult_log2FC>2	cellular_component	cytochrome complex(GO:0070069)	18	29	31	62.069	93.5484	17.3809	0	0.00769913	CG14482|CG3731|CG4169|CG4769|CoIV|CoVIII|CoVIIc|CoVIb|CoVa|CoVb|RFeSP|Ucrh|cype|levy|mt:CoI|mt:CoIII|mt:Cyt-b|ox
WTvssalm_1d adult_log2FC>2	cellular_component	cytoskeletal part(GO:0044430)	29	511	538	5.67515	94.9814	2.86629	0.0052	0.145699	ATPsyn-d|Act88F|Adh|CG10132|CG11876|CG3731|CG4169|CG5028|CG5214|CG6439|CG7834|Hsp70Bbb|Hsp70Bc|Mlc2|Nc73EF|RFeSP|SdhB|TFAM|Ubi-p63E|Yp3|alphaTub84D|betaTub97EF|blw|cp309|fln|kdn|l(1)G0156|skap|wupA
WTvssalm_1d adult_log2FC>2	biological_process	detection of light stimulus(GO:0009583)	5	43	47	11.6279	91.4894	2.9616	0.0158	0.365256	Arr1|Rh4|Sh|inaD|ninaE
WTvssalm_1d adult_log2FC>2	biological_process	determination of adult lifespan(GO:0008340)	11	119	127	9.2437	93.7008	3.50775	0.0016	0.0518916	CG9172|NLaz|SdhC|Sod2|Tpi|cln3|l(3)neo18|levy|mt:ATPase6|sesB|sun
WTvssalm_1d adult_log2FC>2	biological_process	dicarboxylic acid metabolic process(GO:0043648)	4	24	27	16.6667	88.8889	3.56875	0.0076	0.198497	CG8745|Mdh2|SdhC|l(1)G0255
WTvssalm_1d adult_log2FC>2	biological_process	flight behavior(GO:0007629)	4	20	21	20	95.2381	4.07726	0.0046	0.13054	Gpdh|Gpo-1|Sh|sesB
WTvssalm_1d adult_log2FC>2	biological_process	flight(GO:0060361)	3	6	7	50	85.7143	6.2715	0.0002	0.00769913	GlyP|Pgm|Scox
WTvssalm_1d adult_log2FC>2	cellular_component	fumarate reductase complex(GO:0045283)	4	7	7	57.1429	100	7.81333	0	0.00769913	CG10219|SdhA|SdhB|SdhC
WTvssalm_1d adult_log2FC>2	biological_process	generation of precursor metabolites and energy(GO:0006091)	64	118	123	54.2373	95.935	30.5146	0	0.00769913	Ald|CG10219|CG10320|CG11455|CG12203|CG12400|CG12859|CG14482|CG15434|CG3192|CG3214|CG33138|CG3446|CG3621|CG3683|CG3731|CG4169|CG4769|CG5548|CG5703|CG6020|CG6463|CG7598|CG7712|CG7834|CG9140|CG9172|CG9306|CG9485|CoIV|CoVIII|CoVIIc|CoVa|CoVb|Cyt-c-p|Eno|Gapdh1|GlyP|ND23|ND42|ND75|Pdsw|Pfk|Pgi|Pgk|Pglym78|Pgm|RFeSP|SdhA|SdhB|SdhC|Ucrh|cype|l(1)G0334|l(2)35Di|l(3)neo18|levy|mt:CoI|mt:CoIII|mt:Cyt-b|mt:…
WTvssalm_1d adult_log2FC>2	molecular_function	heat shock protein binding(GO:0031072)	5	45	47	11.1111	95.7447	2.83904	0.0174	0.395025	CG11035|CG32640|CG43322|CG7394|l(2)tid
WTvssalm_1d adult_log2FC>2	molecular_function	heme-copper terminal oxidase activity(GO:0015002)	11	23	24	47.8261	95.8333	11.7157	0	0.00769913	CoIV|CoVIII|CoVIIc|CoVIb|CoVa|CoVb|Scox|cype|levy|mt:CoI|mt:CoIII
WTvssalm_1d adult_log2FC>2	molecular_function	hydro-lyase activity(GO:0016836)	6	45	46	13.3333	97.8261	3.66017	0.0036	0.105895	Acon|CG18673|CG1885|CG7772|Eno|l(1)G0255
WTvssalm_1d adult_log2FC>2	molecular_function	hydrogen ion transmembrane transporter activity(GO:0015078)	33	100	104	33	96.1538	16.3346	0	0.00769913	ATPsyn-Cf6|ATPsyn-b|ATPsyn-d|ATPsyn-gamma|CG10731|CG14482|CG1746|CG3321|CG3731|CG4169|CG4692|CoIV|CoVIII|CoVIIc|CoVIb|CoVa|CoVb|Oscp|RFeSP|Scox|Ucrh|blw|cype|l(1)G0230|l(2)06225|levy|mt:ATPase6|mt:ATPase8|mt:CoI|mt:CoIII|mt:Cyt-b|ox|sun
WTvssalm_1d adult_log2FC>2	UserSuppliedAssociations	IFM 72vs30h_log2FC>2	260	1537	1537	16.9161	100	30.8589	0	0.00063871	ATPsyn-Cf6|ATPsyn-b|ATPsyn-d|ATPsyn-gamma|Acon|Act88F|Adh|Alas|Ald|CG10219|CG10320|CG10340|CG10514|CG10581|CG10585|CG10802|CG11029|CG11035|CG11050|CG11455|CG11617|CG11722|CG11752|CG11784|CG11876|CG12105|CG12203|CG12400|CG12506|CG12672|CG12848|CG12859|CG13026|CG13067|CG13365|CG13587|CG1368|CG13810|CG13865|CG14022|CG14075|CG14168|CG14222|CG14270|CG14482|CG14573|CG14683|CG14757|CG14777|CG14780|CG148…
WTvssalm_1d adult_log2FC>2	molecular_function	isocitrate dehydrogenase (NAD+) activity(GO:0004449)	3	6	6	50	100	6.2715	0.0008	0.0276687	CG5028|CG6439|l(1)G0156
WTvssalm_1d adult_log2FC>2	biological_process	lipid metabolic process(GO:0006629)	17	285	318	5.96491	89.6226	2.38825	0.0172	0.391488	CG11029|CG31871|CG42237|CG4825|CG7718|CG7724|CG8630|CG9747|GIIIspla2|Gpdh|Las|LpR1|Yp3|jhamt|mtacp1|ninaG|sws
WTvssalm_1d adult_log2FC>2	cellular_component	lipid particle(GO:0005811)	40	240	250	16.6667	96	11.4099	0	0.00769913	ATPsyn-b|ATPsyn-d|ATPsyn-gamma|Acon|Adh|CG11876|CG1907|CG3321|CG3731|CG4169|CG4692|CG4769|CG5214|CG5261|CG7430|CG7630|CG7834|CoIV|CoVa|CoVb|Eno|Gapdh1|Gpdh|Gpo-1|Hsp70Bbb|Mdh2|ND42|Oscp|Pgi|RpS15Ab|Yp3|alphaTub84D|blw|cu|cype|l(1)G0156|l(1)G0230|l(2)06225|levy|sesB
WTvssalm_1d adult_log2FC>2	cellular_component	M band(GO:0031430)	6	7	7	85.7143	100	11.9693	0	0.00769913	Ald|Gapdh1|Gpdh|Pgk|Pglym78|Tpi
WTvssalm_1d adult_log2FC>2	molecular_function	magnesium ion binding(GO:0000287)	7	45	47	15.5556	95.7447	4.48131	0.0008	0.0276687	Aats-phe|CG10628|CG5028|CG6439|Eno|Pgm|l(1)G0156
WTvssalm_1d adult_log2FC>2	molecular_function	metal Mfuzz Cluster binding(GO:0051540)	10	42	48	23.8095	87.5	7.27477	0	0.00769913	Acon|CG3420|CG9140|CG9172|Las|ND23|ND75|RFeSP|SdhB|l(1)G0136
WTvssalm_1d adult_log2FC>2	UserSuppliedAssociations	Mfuzz Cluster21	41	490	490	8.36735	100	6.09789	0	0.00063871	CG10405|CG13587|CG14777|CG14780|CG17734|CG1907|CG31313|CG32985|CG33138|CG3759|CG42237|CG4741|CG4830|CG5500|CG5646|CG6723|CG8520|CG8630|CG8664|CG8745|CG9090|CG9399|CG9451|Cht5|FBgn0267463|NTPase|Npl4|Tret1-1|alphaTub84D|cu|lox2|mt:ATPase6|mt:CoIII|mt:Cyt-b|mt:ND4L|mt:lrRNA|pgant4|retn|sws|tgy|vanin-like
WTvssalm_1d adult_log2FC>2	UserSuppliedAssociations	Mfuzz Cluster22	64	351	351	18.2336	100	15.4123	0	0.00063871	ATPsyn-gamma|Acon|Act88F|Ald|CG10340|CG11784|CG11876|CG14168|CG17572|CG1824|CG2121|CG34034|CG34134|CG4169|CG42337|CG4769|CG5028|CG5214|CG5261|CG6020|CG6293|CG6439|CG6455|CG7430|CG9140|CG9240|Cyp4aa1|Eno|FBgn0265045|FBgn0265991|FBgn0266377|FBgn0266967|Gapdh1|GlyP|Gpo-1|GstS1|Ir7g|Mdh2|Mlc2|ND75|Nc73EF|Pex1|Pfk|Pgi|Pgk|Scsalpha|SdhA|SdhB|Sh|Tpi|UGP|blw|cue|kdn|l(1)G0156|l(1)G0255|l(1)G0334|l(3)0367…
WTvssalm_1d adult_log2FC>2	UserSuppliedAssociations	Mfuzz Cluster25	17	261	261	6.51341	100	2.75053	0.006	0.012375	CG5326|CR41609|FBgn0267516|ara|snRNA:U2:34ABa|snoRNA:2R:9445205|snoRNA:MeU5-C46|snoRNA:Or-CD1|snoRNA:Or-aca5|snoRNA:Psi18S-1377e|snoRNA:Psi18S-1820|snoRNA:Psi18S-920|snoRNA:Psi28S-1192c|snoRNA:Psi28S-1837b|snoRNA:Psi28S-2566|snoRNA:SC35-a|unsRNA:CG10576-a
WTvssalm_1d adult_log2FC>2	UserSuppliedAssociations	Mfuzz Cluster28	25	267	267	9.3633	100	5.36381	0	0.00063871	CG11562|CG13144|CG14270|CG14864|CG15336|CG15908|CG18136|CG31229|CG3420|CG4627|CG5190|CG6404|ECSIT|Scox|mRpL14|mRpL40|mRpL44|mRpL46|mRpL48|mRpL51|mRpL54|mRpS18A|mRpS22|mRpS6|mRpS7
WTvssalm_1d adult_log2FC>2	UserSuppliedAssociations	Mfuzz Cluster3	95	373	373	25.4692	100	23.6799	0	0.00063871	ATPsyn-Cf6|ATPsyn-b|ATPsyn-d|Adh|CG10219|CG10320|CG10802|CG11455|CG11752|CG12203|CG12400|CG12672|CG12859|CG13365|CG14407|CG14482|CG14806|CG15771|CG15922|CG1707|CG1746|CG1774|CG30415|CG3192|CG3214|CG33054|CG3321|CG34117|CG34242|CG34439|CG3446|CG3621|CG3683|CG3731|CG43322|CG4692|CG5548|CG5703|CG6463|CG7394|CG7598|CG7603|CG7630|CG7712|CG7772|CG7834|CG8680|CG9034|CG9172|CG9306|CG9350|CG9921|CR31781|C…
WTvssalm_1d adult_log2FC>2	UserSuppliedAssociations	Mfuzz Cluster30	13	186	186	6.98925	100	2.67373	0.007	0.01386	CCHa1r|CG13067|CG14569|CG14573|CG30033|CG30280|CG32266|CG34248|Sfp53D|Tusp|cln3|dys|smi35A
WTvssalm_1d adult_log2FC>2	UserSuppliedAssociations	Mfuzz Cluster37	48	513	513	9.35673	100	7.49936	0	0.00063871	CG10514|CG10725|CG11192|CG11672|CG12506|CG12896|CG13810|CG13840|CG14075|CG14500|CG15434|CG17917|CG18404|CG18628|CG2022|CG31813|CG34219|CG3713|CG3819|CG43134|CG43673|CG6628|CG7724|CG7882|CG7906|CG8661|CR42839|Cyp6g2|Ets96B|FBgn0267236|FBgn0267514|FBgn0267515|FBgn0267523|Hsp70Bc|NLaz|Prx2540-1|Yp3|jhamt|mt:ATPase8|mt:ND1|mt:ND2|mt:ND3|mt:srRNA|mt:tRNA:I|ninaG|scpr-A|scpr-B|scpr-C
WTvssalm_1d adult_log2FC>2	UserSuppliedAssociations	Mfuzz Cluster39	55	334	334	16.4671	100	13.2301	0	0.00063871	Aats-phe|CG10628|CG10731|CG11617|CG11722|CG12848|CG13018|CG13220|CG13865|CG14222|CG14683|CG14757|CG14817|CG15773|CG17726|CG30373|CG33228|CG34229|CG3608|CG4882|CG5569|CG5989|CG7172|CG7277|CG8021|CG8067|CG8419|CG9147|CG9640|Cchl|EfTuM|Pgm|Surf1|TFAM|Tom20|betaTub97EF|colt|l(2)k14505|l(2)tid|mRpL16|mRpL18|mRpL27|mRpL34|mRpL42|mRpL45|mRpL52|mRpL55|mRpL9|mRpS10|mRpS14|mRpS16|mRpS17|mRpS18C|mRpS34|tko
WTvssalm_1d adult_log2FC>2	UserSuppliedAssociations	Mfuzz Cluster6	20	304	304	6.57895	100	3.03692	0.0036	0.00792	CG11029|CG11035|CG11050|CG15617|CG17323|CG1889|CG43672|CG5897|Dh44-R2|FBgn0264907|FBgn0266064|GIIIspla2|Gbs-76A|Gpdh|Lcp1|LpR1|Takr99D|Ubi-p63E|rogdi|sphinx
WTvssalm_1d adult_log2FC>2	UserSuppliedAssociations	microtubule_associated	26	512	519	5.07812	98.6513	2.07316	0.0444	0.065606	ATPsyn-d|Adh|CG10132|CG11876|CG3731|CG4169|CG5028|CG5214|CG6439|CG7834|FBgn0265045|Hsp70Bbb|Hsp70Bc|Nc73EF|RFeSP|SdhB|TFAM|Ubi-p63E|Yp3|alphaTub84D|betaTub97EF|blw|cp309|kdn|l(1)G0156|skap
WTvssalm_1d adult_log2FC>2	cellular_component	mitochondrial envelope(GO:0005740)	11	48	56	22.9167	85.7143	7.43861	0	0.00769913	CG10219|CG1907|CG5646|CG6404|CG9090|CG9240|CoVb|Ucp4A|colt|ox|sesB
WTvssalm_1d adult_log2FC>2	cellular_component	mitochondrial inner membrane(GO:0005743)	21	56	63	37.5	88.8889	14.0525	0	0.00769913	CG10219|CG12203|CG12400|CG1824|CG1907|CG3621|CG6404|CG6455|CG6463|Cchl|CoVa|Cyt-c-p|Gpo-1|Scox|Surf1|Ucp4A|colt|levy|mt:CoI|mt:ND2|sesB
WTvssalm_1d adult_log2FC>2	cellular_component	mitochondrial large ribosomal subunit(GO:0005762)	17	47	47	36.1702	100	12.3658	0	0.00769913	mRpL14|mRpL16|mRpL18|mRpL27|mRpL28|mRpL34|mRpL40|mRpL42|mRpL44|mRpL45|mRpL46|mRpL48|mRpL51|mRpL52|mRpL54|mRpL55|mRpL9
WTvssalm_1d adult_log2FC>2	cellular_component	mitochondrial matrix(GO:0005759)	9	53	57	16.9811	92.9825	5.43722	0	0.00769913	Alas|CG3731|CG5028|Cyt-c-p|Mdh2|ND42|Sod2|kdn|l(1)G0156
WTvssalm_1d adult_log2FC>2	cellular_component	mitochondrial membrane part(GO:0044455)	75	127	133	59.0551	95.4887	34.6745	0	0.00769913	ATPsyn-Cf6|ATPsyn-b|ATPsyn-d|ATPsyn-gamma|CG10219|CG10320|CG10731|CG11455|CG12203|CG12400|CG12859|CG14482|CG15434|CG1746|CG31229|CG3192|CG3214|CG3321|CG34439|CG3446|CG3621|CG3683|CG3731|CG4169|CG4692|CG4769|CG5548|CG5703|CG6020|CG6455|CG6463|CG7394|CG7598|CG7712|CG8680|CG9140|CG9172|CG9306|CoIV|CoVIII|CoVIIc|CoVIb|CoVa|CoVb|ND23|ND42|ND75|Oscp|Pdsw|RFeSP|SdhA|SdhB|SdhC|Tom20|Ucrh|blw|cype|l(1)G02…
WTvssalm_1d adult_log2FC>2	cellular_component	mitochondrial small ribosomal subunit(GO:0005763)	12	30	30	40	100	11.0256	0	0.00769913	mRpL42|mRpS10|mRpS14|mRpS16|mRpS17|mRpS18A|mRpS18C|mRpS22|mRpS34|mRpS6|mRpS7|tko
WTvssalm_1d adult_log2FC>2	biological_process	mitochondrial transport(GO:0006839)	9	48	53	18.75	90.566	5.84825	0	0.00769913	CG1907|CG31229|CG7394|Gpdh|Gpo-1|Tom20|Ucp4A|colt|mt:ATPase6
WTvssalm_1d adult_log2FC>2	cellular_component	mitochondrion(GO:0005739)	59	254	269	23.2283	94.4238	17.5684	0	0.00769913	ATPsyn-d|Aats-phe|Acon|Alas|CG10320|CG10340|CG11876|CG12859|CG1907|CG3192|CG3731|CG4169|CG5028|CG5190|CG5548|CG5703|CG6439|CG6455|CG7834|CG8745|Cchl|CoIV|CoVIb|CoVa|CoVb|Cyt-c-p|EfTuM|Gpo-1|Las|Mdh2|ND23|ND42|ND75|Oscp|Pdsw|RFeSP|Scox|SdhA|TFAM|Tom20|blw|kdn|l(1)G0156|l(1)G0230|l(1)G0255|l(1)G0334|l(2)tid|mRpL45|mRpL55|mt:ATPase6|mt:ATPase8|mt:CoI|mt:CoIII|mt:ND1|mt:ND2|mt:ND3|mt:ND4L|mt:ND6|mtac…
WTvssalm_1d adult_log2FC>2	UserSuppliedAssociations	MitoExplorer_all genes	210	1002	1065	20.9581	94.0845	31.6607	0	0.00063871	ATPsyn-Cf6|ATPsyn-b|ATPsyn-d|ATPsyn-gamma|Aats-phe|Acon|Adh|Alas|Ald|CG10219|CG10320|CG10340|CG10585|CG10628|CG10731|CG11035|CG11455|CG11562|CG11722|CG11752|CG11876|CG12203|CG12400|CG12848|CG12859|CG14270|CG14407|CG14482|CG14757|CG14777|CG14806|CG14817|CG15434|CG15908|CG1746|CG17726|CG17734|CG1774|CG1824|CG18673|CG1885|CG1907|CG2022|CG31229|CG3192|CG3214|CG33177|CG3321|CG34117|CG3420|CG34439|CG34…
WTvssalm_1d adult_log2FC>2	UserSuppliedAssociations	MitoExplorer_Electron_Transport_Chain	101	186	192	54.3011	96.875	38.3261	0	0.00063871	ATPsyn-Cf6|ATPsyn-b|ATPsyn-d|ATPsyn-gamma|CG10219|CG10320|CG10340|CG10731|CG11455|CG11562|CG11722|CG11752|CG12203|CG12400|CG12859|CG14482|CG14757|CG15434|CG15908|CG1746|CG17726|CG17734|CG3192|CG3214|CG3321|CG34117|CG3420|CG34439|CG3446|CG3608|CG3621|CG3683|CG3731|CG4169|CG4627|CG4692|CG4769|CG5548|CG5569|CG5703|CG6020|CG6404|CG6463|CG7598|CG7712|CG7834|CG8067|CG8680|CG9140|CG9172|CG9306|CG9350|CG…
WTvssalm_1d adult_log2FC>2	UserSuppliedAssociations	MitoExplorer_Fatty_Acid_Metabolism	3	19	20	15.7895	95	2.95488	0.022	0.0357049	CG1774|CG9147|colt
WTvssalm_1d adult_log2FC>2	UserSuppliedAssociations	MitoExplorer_Glycolysis	10	33	33	30.303	100	8.47582	0	0.00063871	Ald|Eno|FBgn0267385|Gapdh1|Pfk|Pgi|Pgk|Pglym78|Pgm|Tpi
WTvssalm_1d adult_log2FC>2	UserSuppliedAssociations	MitoExplorer_Import_&_Sorting	6	67	74	8.95522	90.5405	2.48239	0.022	0.0357049	CG14270|CG1824|CG31229|CG7394|CG9240|Tom20
WTvssalm_1d adult_log2FC>2	UserSuppliedAssociations	MitoExplorer_Mitochondrial_Carrier	4	39	45	10.2564	86.6667	2.33832	0.033	0.0502615	CG1907|CG5646|CG9090|Ucp4A
WTvssalm_1d adult_log2FC>2	UserSuppliedAssociations	MitoExplorer_Mitochondrial_Dynamics	5	42	43	11.9048	97.6744	3.01384	0.0132	0.0233357	CG6455|CG7603|CG7772|l(3)03670|sesB
WTvssalm_1d adult_log2FC>2	UserSuppliedAssociations	MitoExplorer_Pyruvate_Metabolism	4	21	24	19.0476	87.5	3.92647	0.0054	0.0113745	CG11876|CG5261|CG9399|l(1)G0334
WTvssalm_1d adult_log2FC>2	UserSuppliedAssociations	MitoExplorer_ROS_Defense	5	25	31	20	80.6452	4.54627	0.0006	0.00169714	CG14407|CG14777|CG2022|CG33177|Sod2
WTvssalm_1d adult_log2FC>2	UserSuppliedAssociations	MitoExplorer_TCA_Cycle	12	28	29	42.8571	96.5517	11.454	0	0.00063871	Acon|CG5028|CG5214|CG6439|CG7430|Mdh2|Nc73EF|Scsalpha|kdn|l(1)G0156|l(1)G0255|skap
WTvssalm_1d adult_log2FC>2	UserSuppliedAssociations	MitoExplorer_Translation	38	180	189	21.1111	95.2381	13.0958	0	0.00063871	Aats-phe|CG10628|CG12848|CG14817|CG4882|CG5190|CG7172|CG8021|EfTuM|cu|mRpL14|mRpL16|mRpL18|mRpL27|mRpL28|mRpL34|mRpL40|mRpL42|mRpL44|mRpL45|mRpL46|mRpL48|mRpL51|mRpL52|mRpL54|mRpL55|mRpL9|mRpS10|mRpS14|mRpS16|mRpS17|mRpS18A|mRpS18C|mRpS22|mRpS34|mRpS6|mRpS7|tko
WTvssalm_1d adult_log2FC>2	molecular_function	monosaccharide transmembrane transporter activity(GO:0015145)	3	21	22	14.2857	95.4545	2.73747	0.031	0.576626	CG6293|CG7882|Tret1-1
WTvssalm_1d adult_log2FC>2	biological_process	muscle cell cellular homeostasis(GO:0046716)	3	9	9	33.3333	100	4.93295	0.0032	0.0957189	mt:ATPase6|sesB|wupA
WTvssalm_1d adult_log2FC>2	biological_process	muscle system process(GO:0003012)	3	17	19	17.6471	89.4737	3.22484	0.0206	0.454844	CG2121|Mlc2|fln
WTvssalm_1d adult_log2FC>2	molecular_function	NADH dehydrogenase activity(GO:0003954)	31	41	44	75.6098	93.1818	25.4539	0	0.00769913	CG10320|CG11455|CG12203|CG12400|CG12859|CG15434|CG3192|CG3214|CG3446|CG3621|CG3683|CG5548|CG5703|CG6020|CG6463|CG7712|CG8680|CG9140|CG9172|CG9306|ND23|ND42|ND75|Pdsw|l(2)35Di|l(3)neo18|mt:ND1|mt:ND2|mt:ND3|mt:ND4L|mt:ND6
WTvssalm_1d adult_log2FC>2	biological_process	neuron cellular homeostasis(GO:0070050)	3	9	9	33.3333	100	4.93295	0.004	0.115362	mt:ATPase6|sesB|wgn
WTvssalm_1d adult_log2FC>2	molecular_function	oxidoreductase activity, acting on a heme group of donors(GO:0016675)	11	23	24	47.8261	95.8333	11.7157	0	0.00769913	CoIV|CoVIII|CoVIIc|CoVIb|CoVa|CoVb|Scox|cype|levy|mt:CoI|mt:CoIII
WTvssalm_1d adult_log2FC>2	molecular_function	oxidoreductase activity, acting on NAD(P)H, quinone or similar compound as acceptor(GO:0016655)	27	36	38	75	94.7368	23.6439	0	0.00769913	CG10320|CG12203|CG12400|CG12859|CG3192|CG3214|CG3621|CG3683|CG5548|CG5703|CG6020|CG6463|CG7712|CG8680|CG9140|CG9172|CG9306|ND23|ND42|ND75|Pdsw|l(3)neo18|mt:ND1|mt:ND2|mt:ND3|mt:ND4L|mt:ND6
WTvssalm_1d adult_log2FC>2	molecular_function	oxidoreductase activity, acting on peroxide as acceptor(GO:0016684)	3	24	26	12.5	92.3077	2.44555	0.0428	0.661346	CG12896|GstS1|Prx2540-1
WTvssalm_1d adult_log2FC>2	molecular_function	oxidoreductase activity, acting on the aldehyde or oxo group of donors, disulfide as acceptor(GO:0016624)	3	7	8	42.8571	87.5	5.73534	0.0004	0.0148807	CG11876|Nc73EF|l(1)G0334
WTvssalm_1d adult_log2FC>2	cellular_component	oxidoreductase complex(GO:1990204)	53	93	106	56.9892	87.7358	28.5211	0	0.00769913	CG10219|CG10320|CG11455|CG11876|CG12203|CG12400|CG12859|CG14482|CG15434|CG3192|CG3214|CG34439|CG3446|CG3621|CG3683|CG3731|CG4169|CG4769|CG5214|CG5261|CG5548|CG5703|CG6020|CG6463|CG7430|CG7598|CG7712|CG8680|CG9140|CG9172|CG9306|Gpdh|Gpo-1|ND23|ND42|ND75|Nc73EF|Pdsw|RFeSP|SdhA|SdhB|SdhC|Ucrh|l(1)G0334|l(2)35Di|l(3)neo18|mt:Cyt-b|mt:ND1|mt:ND2|mt:ND3|mt:ND4L|mt:ND6|ox
WTvssalm_1d adult_log2FC>2	molecular_function	P-P-bond-hydrolysis-driven protein transmembrane transporter activity(GO:0015450)	3	22	24	13.6364	91.6667	2.63446	0.035	0.595942	CG31229|Tom20|mRpL45
WTvssalm_1d adult_log2FC>2	molecular_function	phospholipase activity(GO:0004620)	4	41	48	9.7561	85.4167	2.23155	0.0482	0.727024	CG11029|CG42237|GIIIspla2|sws
WTvssalm_1d adult_log2FC>2	biological_process	pyruvate metabolic process(GO:0006090)	10	34	35	29.4118	97.1429	8.34111	0	0.00769913	Ald|CG11876|CG5261|Eno|Gapdh1|Pfk|Pgi|Pgk|Pglym78|l(1)G0334
WTvssalm_1d adult_log2FC>2	cellular_component	respiratory chain(GO:0070469)	12	17	17	70.5882	100	15.2317	0	0.00769913	CG12400|Cyt-c-p|ND42|ND75|RFeSP|mt:CoI|mt:Cyt-b|mt:ND1|mt:ND3|mt:ND6|mtacp1|ox
WTvssalm_1d adult_log2FC>2	biological_process	response to heat(GO:0009408)	6	75	82	8	91.4634	2.18437	0.0388	0.615654	CG11035|CG32640|Hsp67Bc|Hsp70Bbb|Hsp70Bc|l(2)tid
WTvssalm_1d adult_log2FC>2	biological_process	response to mechanical stimulus(GO:0009612)	3	16	18	18.75	88.8889	3.37106	0.0136	0.324567	Tpi|sesB|tko
WTvssalm_1d adult_log2FC>2	biological_process	response to oxidative stress(GO:0006979)	8	67	73	11.9403	91.7808	3.84231	0.0018	0.0577435	CG9172|GstS1|NLaz|SdhC|cln3|l(3)neo18|sesB|sun
WTvssalm_1d adult_log2FC>2	cellular_component	rhabdomere(GO:0016028)	3	21	26	14.2857	80.7692	2.73747	0.0282	0.570052	Arr1|inaD|ninaE
WTvssalm_1d adult_log2FC>2	UserSuppliedAssociations	salm core 133 genes (Spletter et al, 2015)	127	131	133	96.9466	98.4962	59.0073	0	0.00063871	ATPsyn-Cf6|ATPsyn-gamma|Acon|Act88F|CG10514|CG10802|CG11562|CG11852|CG12105|CG12506|CG13067|CG13144|CG13587|CG1368|CG14168|CG14222|CG14270|CG14298|CG14482|CG14683|CG14757|CG14864|CG15336|CG15617|CG1746|CG17726|CG17734|CG1774|CG1885|CG31813|CG31871|CG33054|CG33138|CG33177|CG33228|CG34242|CG34248|CG3608|CG3713|CG3731|CG3964|CG42237|CG42337|CG4627|CG4733|CG4769|CG4825|CG4882|CG5028|CG5190|CG5214|CG5…
WTvssalm_1d adult_log2FC>2	UserSuppliedAssociations	salm core genes (Spletter et al, 2015)	139	710	742	19.5775	95.6873	24.2576	0	0.00063871	ATPsyn-Cf6|ATPsyn-gamma|Acon|Act88F|CG10514|CG10802|CG11050|CG11455|CG11562|CG11852|CG12105|CG12506|CG13067|CG13144|CG13587|CG1368|CG14168|CG14222|CG14270|CG14298|CG14482|CG14683|CG14757|CG14777|CG14864|CG15336|CG15617|CG1746|CG17726|CG17734|CG1774|CG1885|CG31813|CG31871|CG33054|CG33138|CG33177|CG33228|CG34242|CG34248|CG34439|CG3608|CG3713|CG3731|CG3964|CG42237|CG42337|CG4627|CG4733|CG4769|CG4825…
WTvssalm_1d adult_log2FC>2	biological_process	sensory perception of light stimulus(GO:0050953)	3	14	15	21.4286	93.3333	3.70422	0.0118	0.289411	Rh4|ninaE|ninaG
WTvssalm_1d adult_log2FC>2	biological_process	single-organism carbohydrate catabolic process(GO:0044724)	10	29	30	34.4828	96.6667	9.2045	0	0.00769913	Ald|Eno|Gapdh1|GlyP|Pfk|Pgi|Pgk|Pglym78|Pgm|l(1)G0334
WTvssalm_1d adult_log2FC>2	molecular_function	structural constituent of ribosome(GO:0003735)	29	176	178	16.4773	98.8764	9.59954	0	0.00769913	RpS15Ab|mRpL14|mRpL16|mRpL18|mRpL27|mRpL28|mRpL34|mRpL40|mRpL42|mRpL44|mRpL45|mRpL46|mRpL48|mRpL51|mRpL52|mRpL54|mRpL55|mRpL9|mRpS10|mRpS14|mRpS16|mRpS17|mRpS18A|mRpS18C|mRpS22|mRpS34|mRpS6|mRpS7|tko
WTvssalm_1d adult_log2FC>2	molecular_function	succinate dehydrogenase (ubiquinone) activity(GO:0008177)	4	5	5	80	100	9.41247	0	0.00769913	CG10219|SdhA|SdhB|SdhC
WTvssalm_1d adult_log2FC>2	molecular_function	succinate-CoA ligase activity(GO:0004774)	3	6	6	50	100	6.2715	0.0006	0.0213349	Scsalpha|SdhA|skap
WTvssalm_1d adult_log2FC>2	biological_process	translation(GO:0006412)	25	189	193	13.2275	97.9275	7.47537	0	0.00769913	RpS15Ab|mRpL14|mRpL16|mRpL27|mRpL28|mRpL34|mRpL40|mRpL42|mRpL45|mRpL48|mRpL51|mRpL52|mRpL55|mRpL9|mRpS10|mRpS14|mRpS16|mRpS17|mRpS18A|mRpS18C|mRpS22|mRpS34|mRpS6|mRpS7|tko
WTvssalm_1d adult_log2FC>2	cellular_component	tricarboxylic acid cycle enzyme complex(GO:0045239)	6	13	14	46.1538	92.8571	8.472	0	0.00769913	CG5214|CG7430|Nc73EF|Scsalpha|l(1)G0255|skap
WTvssalm_1d adult_log2FC>2	biological_process	tricarboxylic acid cycle(GO:0006099)	16	38	41	42.1053	92.6829	13.1286	0	0.00769913	Acon|CG10219|CG5028|CG5214|CG6439|CG7430|Mdh2|Nc73EF|Scsalpha|SdhA|SdhB|SdhC|kdn|l(1)G0156|l(1)G0255|skap
WTvssalm_1d adult_log2FC>2	cellular_component	Z disc(GO:0030018)	6	17	20	35.2941	85	7.22711	0	0.00769913	Ald|Gapdh1|Gpdh|Pgk|Pglym78|Tpi
WTvssalm_24hAPF_log2FC>2	molecular_function	calcium ion binding(GO:0005509)	5	198	213	2.52525	92.9577	4.61912	0.0008	0.22849	Eip63F-1|Gpo-1|Mlc1|Mlc2|up
WTvssalm_24hAPF_log2FC>2	molecular_function	cytoskeletal protein binding(GO:0008092)	3	210	226	1.42857	92.9204	2.27923	0.0384	1	Tm2|up|wupA
WTvssalm_24hAPF_log2FC>2	UserSuppliedAssociations	IFM 72vs30h_log2FC>2	19	1537	1537	1.23617	100	5.86149	0	0.00141429	Act88F|CG11044|CG14168|CG42319|CG43129|CG7378|CG9090|FBgn0265991|Gpo-1|Mal-B2|Mhc|Mlc1|Mlc2|Tm2|Tsp42Eg|Tsp42Eh|Unc-89|up|wupA
WTvssalm_24hAPF_log2FC>2	cellular_component	intracellular non-membrane-bounded organelle(GO:0043232)	8	730	766	1.09589	95.3003	2.92539	0.0046	1	CG18304|CG8036|Gpo-1|Mhc|Mlp60A|Prm|alpha-Est2|aret
WTvssalm_24hAPF_log2FC>2	biological_process	mesoderm development(GO:0007498)	3	73	75	4.10959	97.3333	4.88528	0.0012	0.332025	Mlc1|Prm|up
WTvssalm_24hAPF_log2FC>2	UserSuppliedAssociations	Mfuzz Cluster14	5	183	183	2.73224	100	5.24135	0.0002	0.00141429	CG32121|CG42390|NT5E-2|aret|zormin
WTvssalm_24hAPF_log2FC>2	UserSuppliedAssociations	Mfuzz Cluster22	13	351	351	3.7037	100	10.3199	0	0.00141429	Act88F|CG14168|CG43078|CG7378|FBgn0265991|Gpo-1|Mhc|Mlc1|Mlc2|Tm2|Tsp42Eh|up|wupA
WTvssalm_24hAPF_log2FC>2	UserSuppliedAssociations	Mfuzz Cluster28	7	267	267	2.62172	100	6.05386	0	0.00141429	CG10710|CG13144|CG13306|CG18304|CG34423|CG5381|FBgn0266084
WTvssalm_24hAPF_log2FC>2	UserSuppliedAssociations	Mfuzz Cluster34	3	223	223	1.34529	100	2.38333	0.0456	0.2618	CG14590|CG17322|Hr38
WTvssalm_24hAPF_log2FC>2	UserSuppliedAssociations	Mfuzz Cluster39	5	334	334	1.49701	100	3.38823	0.0068	0.04488	CG11044|CG42319|CG9640|Mal-B2|Mlp60A
WTvssalm_24hAPF_log2FC>2	molecular_function	microfilament motor activity(GO:0000146)	3	3	3	100	100	26.6418	0	0.0737833	Mhc|Mlc1|Mlc2
WTvssalm_24hAPF_log2FC>2	cellular_component	muscle myosin complex(GO:0005859)	4	5	5	80	100	27.4892	0	0.0737833	Mhc|Mlc1|Mlc2|Prm
WTvssalm_24hAPF_log2FC>2	biological_process	muscle system process(GO:0003012)	3	17	19	17.6471	89.4737	10.9787	0	0.0737833	Mhc|Mlc1|Mlc2
WTvssalm_24hAPF_log2FC>2	biological_process	myofibril assembly(GO:0030239)	5	7	8	71.4286	87.5	29.0252	0	0.0737833	Act88F|Mhc|Prm|up|wupA
WTvssalm_24hAPF_log2FC>2	cellular_component	myofilament(GO:0036379)	3	5	5	60	100	20.5805	0	0.0737833	Mhc|Prm|up
WTvssalm_24hAPF_log2FC>2	molecular_function	phosphatase activity(GO:0016791)	3	158	170	1.89873	92.9412	2.89181	0.0166	1	CG17029|CG7378|NT5E-2
WTvssalm_24hAPF_log2FC>2	UserSuppliedAssociations	salm core 133 genes (Spletter et al, 2015)	6	131	133	4.58015	98.4962	7.89704	0	0.00141429	Act88F|CG13144|CG14168|CG9640|Gpo-1|aret
WTvssalm_24hAPF_log2FC>2	UserSuppliedAssociations	salm core genes (Spletter et al, 2015)	16	710	742	2.25352	95.6873	8.40036	0	0.00141429	Act88F|CG13144|CG14168|CG18304|CG42319|CG42390|CG5381|CG7378|CG9640|FBgn0265991|FBgn0266084|Gpo-1|Mhc|Unc-89|aret|wupA
WTvssalm_24hAPF_log2FC>2	biological_process	sarcomere organization(GO:0045214)	3	20	21	15	95.2381	10.0797	0.0002	0.0737833	Unc-89|up|wupA
WTvssalm_24hAPF_log2FC>2	UserSuppliedAssociations	sarcomeric_proteins	13	76	77	17.1053	98.7013	20.3802	0	0.001	Act88F|CG14168|FBgn0265991|FBgn0266084|Mhc|Mlc1|Mlc2|Mlp60A|Prm|Tm2|Unc-89|up|zormin
WTvssalm_24hAPF_log2FC>2	biological_process	somatic muscle development(GO:0007525)	3	41	43	7.31707	95.3488	6.83376	0	0.0737833	Mhc|Unc-89|org-1
WTvssalm_24hAPF_log2FC>2	molecular_function	structural molecule activity(GO:0005198)	6	447	503	1.34228	88.8668	3.07811	0.0052	1	Act88F|CG13144|CG18304|Mhc|Prm|zormin
WTvssalm_30hAPF_log2FC>2	biological_process	adult somatic muscle development(GO:0007527)	3	12	13	25	92.3077	4.19613	0.0038	0.101341	Mhc|Unc-89|hts
WTvssalm_30hAPF_log2FC>2	molecular_function	alpha-glucosidase activity(GO:0090599)	3	14	15	21.4286	93.3333	3.78617	0.0088	0.205581	CG9485|Mal-B1|Mal-B2
WTvssalm_30hAPF_log2FC>2	biological_process	ATP synthesis coupled proton transport(GO:0015986)	11	21	21	52.381	100	12.5665	0	0.00737833	ATPsyn-Cf6|ATPsyn-b|ATPsyn-d|ATPsyn-gamma|CG1746|CG3321|Oscp|blw|l(1)G0230|l(2)06225|sun
WTvssalm_30hAPF_log2FC>2	molecular_function	carbon-carbon lyase activity(GO:0016830)	4	29	33	13.7931	87.8788	3.15424	0.0102	0.233361	Ald|CG10399|CG10924|r-l
WTvssalm_30hAPF_log2FC>2	biological_process	cellular carbohydrate metabolic process(GO:0044262)	6	46	48	13.0435	95.8333	3.69148	0.0018	0.0522531	CG9485|Gpo-1|ImpL3|Mdh2|Treh|kdn
WTvssalm_30hAPF_log2FC>2	biological_process	cellular component biogenesis(GO:0044085)	8	32	33	25	96.9697	6.85914	0	0.00737833	Amph|CG4038|CG9172|Nop60B|RpLP0-like|Surf1|hoip|mRpL10
WTvssalm_30hAPF_log2FC>2	biological_process	cofactor biosynthetic process(GO:0051188)	7	55	60	12.7273	91.6667	3.90702	0.0012	0.0371497	CG30493|CG3714|CG3803|CG5599|CG8199|Coprox|Coq2
WTvssalm_30hAPF_log2FC>2	cellular_component	contractile fiber part(GO:0044449)	12	30	33	40	90.9091	11.2347	0	0.00737833	Ald|Gapdh1|Mhc|Mlc1|Mlc2|Pgk|Pglym78|Prm|Tm2|Tpi|up|wupA
WTvssalm_30hAPF_log2FC>2	biological_process	cytochrome complex assembly(GO:0017004)	4	12	12	33.3333	100	5.80886	0	0.00737833	CG3803|Cchl|Scox|Surf1
WTvssalm_30hAPF_log2FC>2	cellular_component	cytochrome complex(GO:0070069)	12	29	31	41.3793	93.5484	11.4607	0	0.00737833	CG3731|CG4169|CG4769|CG7580|CoIV|CoVIII|CoVIb|CoVa|CoVb|RFeSP|cype|levy
WTvssalm_30hAPF_log2FC>2	biological_process	determination of adult lifespan(GO:0008340)	10	119	127	8.40336	93.7008	3.11618	0.0026	0.0721643	CG9172|Coq2|Hsp26|Prx3|SdhC|Sod2|Tpi|l(3)neo18|levy|sun
WTvssalm_30hAPF_log2FC>2	biological_process	dicarboxylic acid metabolic process(GO:0043648)	4	24	27	16.6667	88.8889	3.65569	0.0068	0.164951	Got2|Mdh2|SdhC|l(1)G0255
WTvssalm_30hAPF_log2FC>2	biological_process	electron transport chain(GO:0022900)	38	73	76	52.0548	96.0526	23.335	0	0.00737833	CG10219|CG10320|CG12203|CG12400|CG12859|CG3192|CG32649|CG3446|CG3621|CG3683|CG3731|CG4169|CG4769|CG5703|CG6020|CG6463|CG7580|CG7712|CG9140|CG9172|CG9306|CoIV|CoVIII|CoVa|CoVb|ND23|ND42|ND75|Pdsw|RFeSP|SdhA|SdhB|SdhC|cype|l(2)35Di|l(3)neo18|levy|mtacp1
WTvssalm_30hAPF_log2FC>2	biological_process	fatty acid biosynthetic process(GO:0006633)	4	24	26	16.6667	92.3077	3.65569	0.004	0.105405	CG10932|CG12170|beg|mtacp1
WTvssalm_30hAPF_log2FC>2	cellular_component	fumarate reductase complex(GO:0045283)	4	7	7	57.1429	100	7.95386	0	0.00737833	CG10219|SdhA|SdhB|SdhC
WTvssalm_30hAPF_log2FC>2	biological_process	glucose metabolic process(GO:0006006)	3	13	14	23.0769	92.8571	3.98031	0.005	0.125056	CG10924|Gapdh1|Gapdh2
WTvssalm_30hAPF_log2FC>2	molecular_function	heme-copper terminal oxidase activity(GO:0015002)	8	23	24	34.7826	95.8333	8.43496	0	0.00737833	CoIV|CoVIII|CoVIb|CoVa|CoVb|Scox|cype|levy
WTvssalm_30hAPF_log2FC>2	molecular_function	histone deacetylase binding(GO:0042826)	5	14	14	35.7143	100	6.77267	0	0.00737833	CG11160|CG14590|CG9642|Smyd4|msta
WTvssalm_30hAPF_log2FC>2	molecular_function	hydro-lyase activity(GO:0016836)	8	45	46	17.7778	97.8261	5.42814	0	0.00737833	Acon|CG1885|CG4159|CG6543|CG8778|Nop60B|Pbgs|l(1)G0255
WTvssalm_30hAPF_log2FC>2	molecular_function	hydrogen ion transmembrane transporter activity(GO:0015078)	24	100	104	24	96.1538	11.6059	0	0.00737833	ATPsyn-Cf6|ATPsyn-b|ATPsyn-d|ATPsyn-gamma|CG1746|CG3321|CG3731|CG4169|CG4692|CG7580|CoIV|CoVIII|CoVIb|CoVa|CoVb|Oscp|RFeSP|Scox|blw|cype|l(1)G0230|l(2)06225|levy|sun
WTvssalm_30hAPF_log2FC>2	UserSuppliedAssociations	IFM 72vs30_log2FC<-2	57	1177	1177	4.84282	100	3.73128	0.0004	0.000965854	CG10924|CG10959|CG11160|CG11267|CG11340|CG11417|CG11658|CG12836|CG14210|CG14590|CG14949|CG15093|CG1542|CG31038|CG31548|CG32333|CG33331|CG4038|CG43729|CG43740|CG5924|CG6023|CG6767|CG7322|CG8398|CG8778|CG9143|CdGAPr|Eb1|FBgn0265077|FBgn0266456|FBgn0267486|Fen1|Fib|Hr38|Hsp26|ImpL2|ImpL3|NHP2|Nop60B|Past1|RpLP0-like|Rrp4|Sclp|Sucb|Uhg2|bbg|dnk|hoip|l(1)G0020|l(3)72Dn|mira|nclb|nop5|nst|r-l|tinc
WTvssalm_30hAPF_log2FC>2	UserSuppliedAssociations	IFM 72vs30h_log2FC>2	149	1537	1537	9.69421	100	16.0942	0	0.00055	AQP|ATPsyn-Cf6|ATPsyn-b|ATPsyn-d|ATPsyn-gamma|Acon|Act88F|Ald|CG10219|CG10280|CG10320|CG10340|CG11447|CG11752|CG11876|CG12203|CG12400|CG12848|CG12859|CG13026|CG13048|CG13069|CG13365|CG14022|CG14095|CG14147|CG14168|CG14757|CG15456|CG15908|CG1746|CG17726|CG1814|CG1824|CG1885|CG30415|CG3192|CG32649|CG3321|CG3446|CG3608|CG3621|CG3683|CG3731|CG4169|CG42319|CG43129|CG4627|CG4692|CG4769|CG4882|CG5028|CG…
WTvssalm_30hAPF_log2FC>2	biological_process	instar larval or pupal development(GO:0002165)	5	41	42	12.1951	97.619	3.18029	0.006	0.146751	Mdh2|Scox|Surf1|blp|l(2)37Cc
WTvssalm_30hAPF_log2FC>2	molecular_function	intramolecular transferase activity(GO:0016866)	6	18	19	33.3333	94.7368	7.11652	0	0.00737833	CG4038|CG4159|CG7849|Nop60B|Pglym78|nst
WTvssalm_30hAPF_log2FC>2	cellular_component	lipid particle(GO:0005811)	42	240	250	17.5	96	12.4174	0	0.00737833	ATPsyn-b|ATPsyn-d|ATPsyn-gamma|Acon|CG10932|CG11267|CG11876|CG15093|CG1648|CG3321|CG3731|CG4169|CG4692|CG4769|CG5214|CG6543|CG7580|CG7630|CoIV|CoVa|CoVb|Gapdh1|Gapdh2|Got2|Gpo-1|Hsc70-1|Hsp60|Mdh2|ND42|Oscp|Sucb|alpha-Est2|blw|cype|hts|l(1)G0156|l(1)G0230|l(2)06225|l(2)37Cc|levy|mRpL12|porin
WTvssalm_30hAPF_log2FC>2	molecular_function	magnesium ion binding(GO:0000287)	5	45	47	11.1111	95.7447	2.92557	0.01	0.229974	CG13390|CG5028|CG6767|l(1)G0156|nst
WTvssalm_30hAPF_log2FC>2	molecular_function	metal Mfuzz Cluster binding(GO:0051540)	9	42	48	21.4286	87.5	6.56708	0	0.00737833	Acon|CG1458|CG6045|CG9140|CG9172|ND23|ND75|RFeSP|SdhB
WTvssalm_30hAPF_log2FC>2	UserSuppliedAssociations	Mfuzz Cluster11	16	186	186	8.60215	100	4.42447	0	0.00055	CG11267|CG13920|CG14543|CG33331|CG3663|CG5924|CG6045|CG8778|CG9987|Coprox|Hsp60|P32|Sclp|Sucb|l(2)37Cc|nst
WTvssalm_30hAPF_log2FC>2	UserSuppliedAssociations	Mfuzz Cluster14	22	183	183	12.0219	100	7.09434	0	0.00055	Aats-asp|Amph|CG10311|CG10399|CG10914|CG11418|CG12304|CG15766|CG15896|CG1648|CG2034|CG3714|CG42390|CG6983|CG7280|CG7849|CG8199|Coq2|Tig|aret|bru-2|viaf
WTvssalm_30hAPF_log2FC>2	UserSuppliedAssociations	Mfuzz Cluster18	33	255	255	12.9412	100	9.25924	0	0.00055	Aats-ser|CAP|CG11337|CG11679|CG12413|CG13390|CG13458|CG14100|CG31673|CG3803|CG4042|CG4611|CG4619|CG4679|CG4749|CG4908|CG9471|CG9642|FBgn0265862|Prx3|bsf|mRpL15|mRpL19|mRpL21|mRpL3|mRpL36|mRpL37|mRpL4|mRpL43|mRpS2|mRpS26|mRpS35|sni
WTvssalm_30hAPF_log2FC>2	UserSuppliedAssociations	Mfuzz Cluster19	18	287	287	6.27178	100	3.19886	0.0022	0.0045375	CG11357|CG11417|CG1542|CG4038|CG6543|CG9143|Fen1|Fib|Hsp26|ImpL3|NHP2|RpLP0-like|Rrp4|hoip|l(1)G0020|l(3)72Dn|nclb|nop5
WTvssalm_30hAPF_log2FC>2	UserSuppliedAssociations	Mfuzz Cluster22	52	351	351	14.8148	100	12.9713	0	0.00055	AQP|ATPsyn-gamma|Acon|Act88F|Ald|CG10340|CG11876|CG14168|CG1824|CG32649|CG4169|CG43078|CG43897|CG4769|CG5028|CG5214|CG5903|CG6020|CG7378|CG9140|FBgn0265356|FBgn0265380|FBgn0265991|Gapdh1|Gpo-1|Lmpt|Mdh2|Mhc|Mlc1|Mlc2|ND75|Nc73EF|Pex1|Pgk|Scsalpha|SdhA|SdhB|Tm2|Tpi|Treh|blw|cue|kdn|l(1)G0156|l(1)G0255|l(1)G0334|l(3)02640|l(3)03670|mRpL28|tadr|up|wupA
WTvssalm_30hAPF_log2FC>2	UserSuppliedAssociations	Mfuzz Cluster28	54	267	267	20.2247	100	16.4641	0	0.00055	CG11771|CG13144|CG13306|CG13850|CG1458|CG14786|CG15336|CG15908|CG16787|CG17028|CG18304|CG2453|CG2658|CG34423|CG4627|CG5190|CG5705|CG6094|CG8010|CG9791|ECSIT|Egm|EndoG|FBgn0265180|FBgn0266084|Pbgs|Rlc1|Scox|Smyd4|asrij|beg|ico|mRpL1|mRpL12|mRpL13|mRpL14|mRpL2|mRpL20|mRpL38|mRpL40|mRpL44|mRpL46|mRpL48|mRpL49|mRpL51|mRpL54|mRpS22|mRpS24|mRpS25|mRpS30|mRpS6|mRpS9|porin|ttm50
WTvssalm_30hAPF_log2FC>2	UserSuppliedAssociations	Mfuzz Cluster3	62	373	373	16.622	100	15.4403	0	0.00055	ATPsyn-Cf6|ATPsyn-b|ATPsyn-d|CG10219|CG10320|CG11752|CG12203|CG12400|CG12859|CG13365|CG14407|CG15771|CG15922|CG1707|CG1746|CG30415|CG3192|CG3321|CG3446|CG3621|CG3683|CG3731|CG4692|CG5703|CG6463|CG7580|CG7630|CG7712|CG9034|CG9172|CG9306|CG9350|CoIV|CoVIII|CoVIb|CoVa|CoVb|Cyt-c-p|FBgn0265177|FBgn0266582|FBgn0267385|ND23|ND42|NP15.6|Neb-cGP|Oscp|Pdsw|Pglym78|Prm|RFeSP|SdhC|Sirt4|Sod2|Ucp4A|cype|l(1)…
WTvssalm_30hAPF_log2FC>2	UserSuppliedAssociations	Mfuzz Cluster34	34	223	223	15.2466	100	10.6651	0	0.00055	CG10924|CG10932|CG10959|CG11160|CG11658|CG12836|CG14210|CG14285|CG14590|CG14805|CG15093|CG31038|CG31548|CG32333|CG4159|CG43740|CG5599|CG5612|CG6023|CG6767|CG7322|CG8398|CdGAPr|Eb1|FBgn0265077|FBgn0266284|FBgn0266719|Hr38|Past1|RpI12|bbg|hts|l(1)G0004|tinc
WTvssalm_30hAPF_log2FC>2	UserSuppliedAssociations	Mfuzz Cluster39	45	334	334	13.4731	100	11.2018	0	0.00055	CG11447|CG12170|CG12848|CG13937|CG14757|CG14817|CG15456|CG17221|CG17726|CG1814|CG30373|CG30493|CG3608|CG42319|CG4882|CG5989|CG7172|CG8021|CG9640|Cchl|EfTuM|Gapdh2|Mal-B2|Mlp60A|Rh50|Su(P)|Surf1|betaTub97EF|blp|l(2)tid|mRpL10|mRpL16|mRpL18|mRpL27|mRpL42|mRpL45|mRpL52|mRpL55|mRpL9|mRpS10|mRpS14|mRpS16|mRpS18C|mRpS34|tko
WTvssalm_30hAPF_log2FC>2	molecular_function	microfilament motor activity(GO:0000146)	3	3	3	100	100	9.35112	0	0.00737833	Mhc|Mlc1|Mlc2
WTvssalm_30hAPF_log2FC>2	cellular_component	microtubule associated complex(GO:0005875)	27	347	364	7.78098	95.3297	4.72501	0	0.00737833	ATPsyn-d|Aats-asp|CG10399|CG10932|CG11876|CG14100|CG3731|CG4169|CG5028|CG5214|CG6543|CG8778|Eb1|Gapdh2|Hsc70-1|Hsp26|Hsp60|Nc73EF|RFeSP|SdhB|blw|kdn|l(1)G0156|l(2)37Cc|mRpS30|porin|r-l
WTvssalm_30hAPF_log2FC>2	UserSuppliedAssociations	microtubule_associated	29	512	519	5.66406	98.6513	3.4959	0.0008	0.00184186	ATPsyn-d|Aats-asp|CG10399|CG10932|CG11876|CG14100|CG3731|CG4169|CG5028|CG5214|CG6543|CG8778|Eb1|Gapdh2|Hsc70-1|Hsp26|Hsp60|Nc73EF|RFeSP|SdhB|betaTub97EF|blw|kdn|l(1)G0156|l(2)37Cc|mRpS30|mira|porin|r-l
WTvssalm_30hAPF_log2FC>2	cellular_component	mitochondrial part(GO:0044429)	132	357	383	36.9748	93.2115	36.1588	0	0.00737833	ATPsyn-Cf6|ATPsyn-b|ATPsyn-d|ATPsyn-gamma|Aats-leu|CG10219|CG10320|CG10399|CG11267|CG12203|CG12400|CG12859|CG1746|CG1824|CG3192|CG3321|CG33331|CG3446|CG3621|CG3683|CG3731|CG3803|CG4169|CG4692|CG4769|CG4908|CG5028|CG5214|CG5599|CG5646|CG5703|CG5924|CG6020|CG6463|CG6543|CG7280|CG7580|CG7712|CG8199|CG9090|CG9140|CG9172|CG9306|Cchl|CoIV|CoVIII|CoVIb|CoVa|CoVb|Cyt-c-p|EndoG|Got2|Gpo-1|Hsp60|Mdh2|ND23|…
WTvssalm_30hAPF_log2FC>2	biological_process	mitochondrial transport(GO:0006839)	5	48	53	10.4167	90.566	2.75269	0.0156	0.32653	CG33331|Gpo-1|Hsp60|Ucp4A|porin
WTvssalm_30hAPF_log2FC>2	biological_process	mitochondrion organization(GO:0007005)	7	48	57	14.5833	84.2105	4.36834	0.0004	0.0139984	CG5924|EndoG|Hsp60|mRpL12|porin|ttm50|up
WTvssalm_30hAPF_log2FC>2	cellular_component	mitochondrion(GO:0005739)	67	254	269	26.378	94.4238	20.7861	0	0.00737833	ATPsyn-d|Aats-leu|Acon|CG10320|CG10340|CG10924|CG10932|CG11267|CG11876|CG12413|CG12859|CG15093|CG2658|CG3192|CG32649|CG34423|CG3731|CG4169|CG5028|CG5190|CG5703|CG5705|CG5924|CG6543|Cchl|CoIV|CoVIb|CoVa|CoVb|Coprox|Cyt-c-p|EfTuM|EndoG|Got2|Gpo-1|Hsc70-1|Hsp60|Mdh2|ND23|ND42|ND75|Oscp|P32|Pdsw|Prx3|RFeSP|Scox|SdhA|beg|blw|dnk|ico|kdn|l(1)G0156|l(1)G0230|l(1)G0255|l(1)G0334|l(2)37Cc|l(2)tid|mRpL1|mR…
WTvssalm_30hAPF_log2FC>2	UserSuppliedAssociations	MitoExplorer_all genes	222	1002	1065	22.1557	94.0845	36.551	0	0.00055	ATPsyn-Cf6|ATPsyn-b|ATPsyn-d|ATPsyn-gamma|Aats-asp|Aats-leu|Aats-ser|Acon|Ald|CG10219|CG10320|CG10340|CG10399|CG10914|CG10924|CG10932|CG11267|CG11337|CG11418|CG11447|CG11679|CG11752|CG11771|CG11876|CG12170|CG12203|CG12400|CG12413|CG12848|CG12859|CG13390|CG13850|CG14100|CG14407|CG1458|CG14757|CG14786|CG14817|CG15093|CG15896|CG15908|CG16787|CG17221|CG1746|CG17726|CG1824|CG1885|CG2022|CG2453|CG2658|…
WTvssalm_30hAPF_log2FC>2	UserSuppliedAssociations	MitoExplorer_Amino_Acid_Metabolism	8	58	63	13.7931	92.0635	4.75992	0.0004	0.000965854	CG10399|CG10932|CG15093|CG5599|CG7280|CG8199|CG8778|Got2
WTvssalm_30hAPF_log2FC>2	UserSuppliedAssociations	MitoExplorer_Apoptosis	4	45	47	8.88889	95.7447	2.27633	0.0468	0.0690088	CG5989|Hsc70-1|l(2)tid|porin
WTvssalm_30hAPF_log2FC>2	UserSuppliedAssociations	MitoExplorer_Electron_Transport_Chain	76	186	192	40.8602	96.875	30.1635	0	0.00055	ATPsyn-Cf6|ATPsyn-b|ATPsyn-d|ATPsyn-gamma|CG10219|CG10320|CG10340|CG11752|CG12203|CG12400|CG12859|CG13850|CG1458|CG14757|CG15908|CG17221|CG1746|CG17726|CG3192|CG32649|CG3321|CG34423|CG3446|CG3608|CG3621|CG3683|CG3731|CG3803|CG4042|CG4169|CG4627|CG4692|CG4769|CG4908|CG5703|CG6020|CG6463|CG7580|CG7712|CG9140|CG9172|CG9306|CG9350|Cchl|CoIV|CoVIII|CoVIb|CoVa|CoVb|Cyt-c-p|ECSIT|Egm|FBgn0266582|Gpo-1|N…
WTvssalm_30hAPF_log2FC>2	UserSuppliedAssociations	MitoExplorer_Glycolysis	8	33	33	24.2424	100	7.07809	0	0.00055	Ald|FBgn0267385|Gapdh1|Gapdh2|Mipp1|Pgk|Pglym78|Tpi
WTvssalm_30hAPF_log2FC>2	UserSuppliedAssociations	MitoExplorer_Import_&_Sorting	6	67	74	8.95522	90.5405	2.81155	0.0142	0.02343	CG11267|CG1824|CG33331|Hsp60|blp|ttm50
WTvssalm_30hAPF_log2FC>2	UserSuppliedAssociations	MitoExplorer_Pyruvate_Metabolism	4	21	24	19.0476	87.5	4.25987	0.0024	0.00484898	CG10924|CG11876|ImpL3|l(1)G0334
WTvssalm_30hAPF_log2FC>2	UserSuppliedAssociations	MitoExplorer_Replication_&_Transcription	6	31	33	19.3548	93.9394	5.27715	0.0002	0.00055	CG5924|CG9791|EndoG|Fen1|dnk|l(2)37Cc
WTvssalm_30hAPF_log2FC>2	UserSuppliedAssociations	MitoExplorer_ROS_Defense	4	25	31	16	80.6452	3.76264	0.0052	0.00919286	CG14407|CG2022|Prx3|Sod2
WTvssalm_30hAPF_log2FC>2	UserSuppliedAssociations	MitoExplorer_TCA_Cycle	10	28	29	35.7143	96.5517	10.0484	0	0.00055	Acon|CG5028|CG5214|Mdh2|Nc73EF|Scsalpha|Sucb|kdn|l(1)G0156|l(1)G0255
WTvssalm_30hAPF_log2FC>2	UserSuppliedAssociations	MitoExplorer_Translation	77	180	189	42.7778	95.2381	31.1709	0	0.00055	Aats-asp|Aats-leu|Aats-ser|CG10914|CG11337|CG11418|CG11447|CG11679|CG12413|CG12848|CG13390|CG14100|CG14786|CG14817|CG15896|CG4159|CG4611|CG4679|CG4749|CG4882|CG5190|CG5705|CG6094|CG7172|CG8021|EfTuM|KH1|Rlc1|bsf|ico|mRpL1|mRpL10|mRpL12|mRpL13|mRpL14|mRpL15|mRpL16|mRpL18|mRpL19|mRpL2|mRpL20|mRpL21|mRpL27|mRpL28|mRpL3|mRpL36|mRpL37|mRpL38|mRpL4|mRpL40|mRpL42|mRpL43|mRpL44|mRpL45|mRpL46|mRpL48|mRpL4…
WTvssalm_30hAPF_log2FC>2	UserSuppliedAssociations	MitoExplorer_Ubiquinone_Biosynthesis	3	8	9	37.5	88.8889	5.66045	0.0012	0.0027	CG2453|CG30493|Coq2
WTvssalm_30hAPF_log2FC>2	biological_process	muscle system process(GO:0003012)	4	17	19	23.5294	89.4737	4.65683	0.0014	0.042019	Mhc|Mlc1|Mlc2|Sclp
WTvssalm_30hAPF_log2FC>2	biological_process	myofibril assembly(GO:0030239)	5	7	8	71.4286	87.5	10.0649	0	0.00737833	Act88F|Mhc|Prm|up|wupA
WTvssalm_30hAPF_log2FC>2	molecular_function	NAD binding(GO:0051287)	9	37	40	24.3243	92.5	7.14753	0	0.00737833	CG15093|CG31673|CG5028|CG5703|CG9140|Gapdh1|Gapdh2|Sirt4|l(1)G0156
WTvssalm_30hAPF_log2FC>2	molecular_function	NADH dehydrogenase activity(GO:0003954)	21	41	44	51.2195	93.1818	17.1605	0	0.00737833	CG10320|CG12203|CG12400|CG12859|CG3192|CG3446|CG3621|CG3683|CG5703|CG6020|CG6463|CG7712|CG9140|CG9172|CG9306|ND23|ND42|ND75|Pdsw|l(2)35Di|l(3)neo18
WTvssalm_30hAPF_log2FC>2	cellular_component	nucleolar part(GO:0044452)	3	10	10	30	100	4.71338	0.0032	0.0869104	CG4038|Fib|RpI12
WTvssalm_30hAPF_log2FC>2	cellular_component	nucleolus(GO:0005730)	8	59	64	13.5593	92.1875	4.40531	0.0006	0.0201227	CG1542|Fib|NHP2|Nop60B|hoip|l(1)G0004|mRpL55|nop5
WTvssalm_30hAPF_log2FC>2	molecular_function	oxidoreductase activity, acting on a heme group of donors(GO:0016675)	8	23	24	34.7826	95.8333	8.43496	0	0.00737833	CoIV|CoVIII|CoVIb|CoVa|CoVb|Scox|cype|levy
WTvssalm_30hAPF_log2FC>2	molecular_function	oxidoreductase activity, acting on a sulfur group of donors(GO:0016667)	4	42	44	9.52381	95.4545	2.25038	0.0356	0.55788	CG14407|CG7280|CG9471|Su(P)
WTvssalm_30hAPF_log2FC>2	molecular_function	oxidoreductase activity, acting on CH-OH group of donors(GO:0016614)	10	112	121	8.92857	92.562	3.33416	0.0018	0.0522531	CG15093|CG31673|CG5028|CG6045|CG7322|Gpo-1|ImpL3|Mdh2|l(1)G0156|sni
WTvssalm_30hAPF_log2FC>2	molecular_function	oxidoreductase activity, acting on NAD(P)H, quinone or similar compound as acceptor(GO:0016655)	19	36	38	52.7778	94.7368	16.599	0	0.00737833	CG10320|CG12203|CG12400|CG12859|CG3192|CG3621|CG3683|CG5703|CG6020|CG6463|CG7712|CG9140|CG9172|CG9306|ND23|ND42|ND75|Pdsw|l(3)neo18
WTvssalm_30hAPF_log2FC>2	molecular_function	oxidoreductase activity, acting on the aldehyde or oxo group of donors, disulfide as acceptor(GO:0016624)	4	7	8	57.1429	87.5	7.95386	0	0.00737833	CG11876|CG8199|Nc73EF|l(1)G0334
WTvssalm_30hAPF_log2FC>2	cellular_component	oxidoreductase complex(GO:1990204)	36	93	106	38.7097	87.7358	19.1457	0	0.00737833	CG10219|CG10320|CG11876|CG12203|CG12400|CG12859|CG3192|CG3446|CG3621|CG3683|CG3731|CG4169|CG4769|CG5214|CG5599|CG5703|CG6020|CG6463|CG7580|CG7712|CG9140|CG9172|CG9306|Gpo-1|ND23|ND42|ND75|Nc73EF|Pdsw|RFeSP|SdhA|SdhB|SdhC|l(1)G0334|l(2)35Di|l(3)neo18
WTvssalm_30hAPF_log2FC>2	biological_process	oxidoreduction coenzyme metabolic process(GO:0006733)	4	20	21	20	95.2381	4.16964	0.003	0.0819815	CG15093|CG30493|CG3714|Coq2
WTvssalm_30hAPF_log2FC>2	biological_process	pseudouridine synthesis(GO:0001522)	5	11	12	45.4545	91.6667	7.80709	0	0.00737833	CG4038|CG4159|CG7849|NHP2|Nop60B
WTvssalm_30hAPF_log2FC>2	biological_process	pyruvate metabolic process(GO:0006090)	9	34	35	26.4706	97.1429	7.55054	0	0.00737833	Ald|CG10932|CG11876|Gapdh1|Gapdh2|ImpL3|Pgk|Pglym78|l(1)G0334
WTvssalm_30hAPF_log2FC>2	cellular_component	respiratory chain(GO:0070469)	6	17	17	35.2941	100	7.36743	0	0.00737833	CG12400|Cyt-c-p|ND42|ND75|RFeSP|mtacp1
WTvssalm_30hAPF_log2FC>2	molecular_function	ribonuclease activity(GO:0004540)	4	40	43	10	93.0233	2.36441	0.0314	0.508255	CG11337|EndoG|Rrp4|mRpL44
WTvssalm_30hAPF_log2FC>2	cellular_component	ribosome(GO:0005840)	27	139	140	19.4245	99.2857	10.6771	0	0.00737833	CG18304|Rlc1|mRpL12|mRpL13|mRpL14|mRpL16|mRpL19|mRpL2|mRpL20|mRpL21|mRpL27|mRpL3|mRpL36|mRpL37|mRpL4|mRpL42|mRpL48|mRpL49|mRpS10|mRpS14|mRpS16|mRpS18C|mRpS2|mRpS30|mRpS6|mRpS9|tko
WTvssalm_30hAPF_log2FC>2	UserSuppliedAssociations	RNA_binding_proteins	33	550	884	6	62.2172	4.09644	0	0.00055	CG11337|CG11418|CG12413|CG14100|CG1542|CG4038|CG4159|CG4679|CG5705|CG6094|CG7849|CG8021|CG8778|CG9143|EfTuM|Fib|NHP2|Nop60B|Rrp4|aret|bru-2|bsf|hoip|ico|l(1)G0004|mRpL1|mRpL16|mRpL20|mRpL21|mRpL44|mRpL49|mRpL55|mRpS6
WTvssalm_30hAPF_log2FC>2	molecular_function	rRNA binding(GO:0019843)	5	11	11	45.4545	100	7.80709	0	0.00737833	CG4038|NHP2|mRpL16|mRpL20|mRpS6
WTvssalm_30hAPF_log2FC>2	biological_process	rRNA processing(GO:0006364)	6	33	35	18.1818	94.2857	4.77538	0.0002	0.00737833	CG1542|CG4038|Fib|NHP2|Nop60B|nop5
WTvssalm_30hAPF_log2FC>2	molecular_function	S-acyltransferase activity(GO:0016417)	3	25	27	12	92.5926	2.42685	0.037	0.571724	CG5214|CG5599|beg
WTvssalm_30hAPF_log2FC>2	UserSuppliedAssociations	salm core 133 genes (Spletter et al, 2015)	55	131	133	41.9847	98.4962	26.0113	0	0.00055	ATPsyn-Cf6|ATPsyn-gamma|Acon|Act88F|CG13144|CG14168|CG14298|CG14757|CG15336|CG1746|CG17726|CG1885|CG3608|CG3731|CG4627|CG4769|CG4882|CG5028|CG5190|CG5214|CG5646|CG7630|CG9485|CG9640|ECSIT|EfTuM|Gpo-1|LpR1|ND42|NTPase|Nc73EF|Neb-cGP|Pex1|Scsalpha|SdhA|Surf1|aret|blw|cue|l(1)G0156|l(1)G0255|l(3)neo18|mRpL14|mRpL27|mRpL42|mRpL44|mRpL46|mRpL51|mRpL52|mRpL54|mRpL55|mRpS18C|mRpS22|mRpS34|mtacp1
WTvssalm_30hAPF_log2FC>2	UserSuppliedAssociations	salm core genes (Spletter et al, 2015)	86	710	742	12.1127	95.6873	14.4144	0	0.00055	ATPsyn-Cf6|ATPsyn-gamma|Aats-asp|Acon|Act88F|Amph|CAP|CG10311|CG13144|CG14168|CG14298|CG14757|CG15336|CG1746|CG17726|CG18304|CG1885|CG2658|CG3608|CG3731|CG42319|CG42390|CG43707|CG43729|CG43897|CG4627|CG4769|CG4882|CG5028|CG5190|CG5214|CG5621|CG5646|CG6767|CG7378|CG7630|CG9172|CG9485|CG9640|ECSIT|Eb1|EfTuM|FBgn0265180|FBgn0265356|FBgn0265991|FBgn0266084|Gpo-1|Lmpt|LpR1|Mhc|ND42|NTPase|Nc73EF|Neb-c…
WTvssalm_30hAPF_log2FC>2	biological_process	sarcomere organization(GO:0045214)	4	20	21	20	95.2381	4.16964	0.0026	0.0721643	Unc-89|hts|up|wupA
WTvssalm_30hAPF_log2FC>2	UserSuppliedAssociations	sarcomeric_proteins	15	76	77	19.7368	98.7013	6.84446	0	0.00096	Act88F|CG14168|FBgn0265356|FBgn0265991|FBgn0266084|Lmpt|Mhc|Mlc1|Mlc2|Mlp60A|Prm|Tm2|Unc-89|hts|up
WTvssalm_30hAPF_log2FC>2	cellular_component	small nucleolar ribonucleoprotein complex(GO:0005732)	3	5	5	60	100	7.07836	0	0.00737833	CG4038|Fib|NHP2
WTvssalm_30hAPF_log2FC>2	molecular_function	structural constituent of ribosome(GO:0003735)	49	176	178	27.8409	98.8764	18.327	0	0.00737833	CG18304|Rlc1|mRpL1|mRpL10|mRpL12|mRpL13|mRpL14|mRpL15|mRpL16|mRpL18|mRpL19|mRpL2|mRpL20|mRpL21|mRpL27|mRpL28|mRpL3|mRpL36|mRpL37|mRpL38|mRpL4|mRpL40|mRpL42|mRpL43|mRpL44|mRpL45|mRpL46|mRpL48|mRpL49|mRpL51|mRpL52|mRpL54|mRpL55|mRpL9|mRpS10|mRpS14|mRpS16|mRpS18C|mRpS2|mRpS22|mRpS24|mRpS25|mRpS26|mRpS30|mRpS34|mRpS35|mRpS6|mRpS9|tko
WTvssalm_30hAPF_log2FC>2	molecular_function	succinate dehydrogenase (ubiquinone) activity(GO:0008177)	4	5	5	80	100	9.57591	0	0.00737833	CG10219|SdhA|SdhB|SdhC
WTvssalm_30hAPF_log2FC>2	molecular_function	succinate-CoA ligase (GDP-forming) activity(GO:0004776)	3	4	4	75	100	8.00608	0.0002	0.00737833	Scsalpha|SdhA|Sucb
WTvssalm_30hAPF_log2FC>2	biological_process	tetrapyrrole biosynthetic process(GO:0033014)	5	11	12	45.4545	91.6667	7.80709	0	0.00737833	CG1885|CG3803|Coprox|Pbgs|l(3)02640
WTvssalm_30hAPF_log2FC>2	molecular_function	translation factor activity, nucleic acid binding(GO:0008135)	6	74	77	8.10811	96.1039	2.30941	0.0232	0.454249	CG12413|CG5705|CG6094|EfTuM|ico|mRpL49
WTvssalm_30hAPF_log2FC>2	biological_process	translation(GO:0006412)	46	189	193	24.3386	97.9275	16.2902	0	0.00737833	CG12413|CG18304|Rlc1|mRpL1|mRpL10|mRpL12|mRpL13|mRpL14|mRpL15|mRpL16|mRpL19|mRpL2|mRpL20|mRpL21|mRpL27|mRpL28|mRpL3|mRpL36|mRpL37|mRpL38|mRpL4|mRpL40|mRpL42|mRpL43|mRpL45|mRpL48|mRpL49|mRpL51|mRpL52|mRpL55|mRpL9|mRpS10|mRpS14|mRpS16|mRpS18C|mRpS2|mRpS22|mRpS24|mRpS25|mRpS26|mRpS30|mRpS34|mRpS35|mRpS6|mRpS9|tko
WTvssalm_30hAPF_log2FC>2	biological_process	tricarboxylic acid cycle(GO:0006099)	15	38	41	39.4737	92.6829	12.4679	0	0.00737833	Acon|CG10219|CG5028|CG5214|CG5599|Mdh2|Nc73EF|Scsalpha|SdhA|SdhB|SdhC|Sucb|kdn|l(1)G0156|l(1)G0255
WTvssalm_72hAPF_log2FC>2	biological_process	alditol phosphate metabolic process(GO:0052646)	3	12	12	25	100	3.89141	0.0064	0.152327	CG4825|Gpdh|Gpo-1
WTvssalm_72hAPF_log2FC>2	molecular_function	amide binding(GO:0033218)	3	24	26	12.5	92.3077	2.27068	0.0464	0.618713	CG14694|CG6574|mtacp1
WTvssalm_72hAPF_log2FC>2	molecular_function	anion binding(GO:0043168)	59	1093	1173	5.39799	93.1799	3.08693	0.006	0.143967	ATPsyn-beta|Aats-phe|Aats-ser|Act88F|Adk1|Adk2|Alas|CG10628|CG10802|CG10924|CG12736|CG14694|CG1516|CG16912|CG1824|CG2658|CG31183|CG3608|CG3964|CG43143|CG4908|CG4945|CG6512|CG6574|CG7277|CG7430|CG9140|EF-G2|Ef1alpha100E|EfTuM|Egm|Fps85D|GlyP|Hex-A|Hsc70-1|Marf|Mhc|Mical|ND42|Nc73EF|Nek2|Pex1|Pfrx|PhKgamma|Pink1|SdhA|Sirt4|Unc-89|b|betaTub97EF|blw|c12.2|ico|l(2)tid|mRpL38|mtacp1|sgg|skap|sqa
WTvssalm_72hAPF_log2FC>2	biological_process	ATP synthesis coupled proton transport(GO:0015986)	12	21	21	57.1429	100	12.9325	0	0.00623521	ATPsyn-Cf6|ATPsyn-b|ATPsyn-beta|ATPsyn-d|ATPsyn-gamma|CG1746|CG3321|Oscp|blw|l(1)G0230|l(2)06225|sun
WTvssalm_72hAPF_log2FC>2	molecular_function	carbohydrate kinase activity(GO:0019200)	3	15	15	20	100	3.32856	0.016	0.329451	Hex-A|Pfk|Pfrx
WTvssalm_72hAPF_log2FC>2	cellular_component	contractile fiber part(GO:0044449)	14	30	33	46.6667	90.9091	12.4313	0	0.00623521	Actn|Ald|Gapdh1|Gpdh|Mhc|Mlc1|Mlc2|Msp-300|Pgk|Pglym78|Tm1|Tpi|Zasp66|wupA
WTvssalm_72hAPF_log2FC>2	biological_process	cytochrome complex assembly(GO:0017004)	8	12	12	66.6667	100	11.5139	0	0.00623521	CG3803|CG5037|CG6404|CG7598|CG9065|Cchl|Scox|Surf1
WTvssalm_72hAPF_log2FC>2	cellular_component	cytochrome complex(GO:0070069)	15	29	31	51.7241	93.5484	13.6612	0	0.00623521	CG14482|CG18809|CG3731|CG4169|CG4769|CG7580|CoIV|CoVIII|CoVIIc|CoVIb|CoVa|CoVb|RFeSP|cype|levy
WTvssalm_72hAPF_log2FC>2	biological_process	determination of adult lifespan(GO:0008340)	10	119	127	8.40336	93.7008	2.70769	0.0058	0.140694	CG18809|CG9172|Coq2|SdhC|Sod2|Tpi|l(3)neo18|levy|sesB|sun
WTvssalm_72hAPF_log2FC>2	biological_process	dicarboxylic acid metabolic process(GO:0043648)	4	24	27	16.6667	88.8889	3.34932	0.0076	0.178017	Mdh2|Men-b|SdhC|l(1)G0255
WTvssalm_72hAPF_log2FC>2	biological_process	flight behavior(GO:0007629)	4	20	21	20	95.2381	3.84445	0.0036	0.0915931	Actn|Gpdh|Gpo-1|sesB
WTvssalm_72hAPF_log2FC>2	biological_process	flight(GO:0060361)	5	6	7	83.3333	85.7143	10.2945	0	0.00623521	GlyP|Hex-A|Mhc|Pgm|Scox
WTvssalm_72hAPF_log2FC>2	cellular_component	fumarate reductase complex(GO:0045283)	4	7	7	57.1429	100	7.46134	0	0.00623521	CG10219|SdhA|SdhB|SdhC
WTvssalm_72hAPF_log2FC>2	biological_process	generation of precursor metabolites and energy(GO:0006091)	64	118	123	54.2373	95.935	29.1306	0	0.00623521	Ald|CG10219|CG10320|CG11455|CG12203|CG12400|CG12859|CG14482|CG18809|CG1970|CG3192|CG3214|CG32649|CG33138|CG3446|CG3621|CG3683|CG3731|CG4169|CG4769|CG5548|CG5703|CG6020|CG6463|CG7580|CG7598|CG7712|CG7766|CG7834|CG8475|CG9140|CG9172|CG9306|CG9485|CoIV|CoVIII|CoVIIc|CoVa|CoVb|Cyt-c-p|Eno|Gapdh1|GlyP|Hex-A|ND23|ND42|ND75|Pdsw|Pfk|Pgi|Pgk|Pglym78|Pgm|PhKgamma|RFeSP|SdhA|SdhB|SdhC|cype|l(1)G0334|l(2)35…
WTvssalm_72hAPF_log2FC>2	biological_process	glucan metabolic process(GO:0044042)	7	8	9	87.5	88.8889	12.5105	0	0.00623521	CG33138|CG7766|CG8475|CG9485|GlyP|Pgm|PhKgamma
WTvssalm_72hAPF_log2FC>2	biological_process	gluconeogenesis(GO:0006094)	3	3	4	100	75	8.802	0	0.00623521	CG10924|CG1516|Pgi
WTvssalm_72hAPF_log2FC>2	molecular_function	heme-copper terminal oxidase activity(GO:0015002)	10	23	24	43.4783	95.8333	10.073	0	0.00623521	CG18809|CoIV|CoVIII|CoVIIc|CoVIb|CoVa|CoVb|Scox|cype|levy
WTvssalm_72hAPF_log2FC>2	molecular_function	hydrogen ion transmembrane transporter activity(GO:0015078)	28	100	104	28	96.1538	12.8748	0	0.00623521	ATPsyn-Cf6|ATPsyn-b|ATPsyn-beta|ATPsyn-d|ATPsyn-gamma|CG14482|CG1746|CG18809|CG3321|CG3731|CG4169|CG4692|CG7580|CoIV|CoVIII|CoVIIc|CoVIb|CoVa|CoVb|Oscp|RFeSP|Scox|blw|cype|l(1)G0230|l(2)06225|levy|sun
WTvssalm_72hAPF_log2FC>2	UserSuppliedAssociations	IFM 72vs30h_log2FC>2	282	1537	1537	18.3474	100	34.0826	0	0.000495	AQP|ATPsyn-Cf6|ATPsyn-b|ATPsyn-beta|ATPsyn-d|ATPsyn-gamma|Acon|Acsl|Act88F|Actn|Adk1|Adk2|Alas|Ald|CG10219|CG10320|CG10340|CG1041|CG10561|CG10802|CG11044|CG11099|CG11275|CG11455|CG11617|CG11722|CG11752|CG11876|CG11878|CG12091|CG12105|CG12162|CG12203|CG12400|CG12848|CG12859|CG13026|CG13048|CG13365|CG13587|CG13623|CG14022|CG14130|CG14147|CG14168|CG14196|CG14270|CG14290|CG14300|CG14482|CG14570|CG146…
WTvssalm_72hAPF_log2FC>2	biological_process	instar larval or pupal development(GO:0002165)	4	41	42	9.7561	97.619	2.04119	0.0448	0.601911	Mdh2|Scox|Surf1|blp
WTvssalm_72hAPF_log2FC>2	molecular_function	isocitrate dehydrogenase (NAD+) activity(GO:0004449)	3	6	6	50	100	5.9838	0.0008	0.0231477	CG5028|CG6439|l(1)G0156
WTvssalm_72hAPF_log2FC>2	molecular_function	ligase activity, forming carbon-oxygen bonds(GO:0016875)	4	41	42	9.7561	97.619	2.04119	0.0406	0.563436	Aats-phe|Aats-ser|CG10802|CG16912
WTvssalm_72hAPF_log2FC>2	cellular_component	lipid particle(GO:0005811)	41	240	250	17.0833	96	11.0532	0	0.00623521	ATPsyn-b|ATPsyn-beta|ATPsyn-d|ATPsyn-gamma|Acon|Acsl|Adk2|CG11876|CG1516|CG3321|CG3731|CG4169|CG4692|CG4769|CG5214|CG5261|CG7430|CG7580|CG7630|CG7834|CG7920|CoIV|CoVa|CoVb|Ef1alpha100E|Eno|Gapdh1|Gpdh|Gpo-1|Hsc70-1|Mdh2|ND42|Oscp|Pgi|blw|cype|l(1)G0156|l(1)G0230|l(2)06225|levy|sesB
WTvssalm_72hAPF_log2FC>2	molecular_function	lyase activity(GO:0016829)	11	125	136	8.8	91.9118	3.01149	0.0026	0.0683098	Acon|Ald|CG10924|CG1885|CG31183|Cchl|Eno|Pbgs|Updo|b|l(1)G0255
WTvssalm_72hAPF_log2FC>2	biological_process	macromolecular complex disassembly(GO:0032984)	5	18	19	27.7778	94.7368	5.38998	0	0.00623521	CG13163|CG5705|CG6094|EF-G2|Mical
WTvssalm_72hAPF_log2FC>2	molecular_function	magnesium ion binding(GO:0000287)	7	45	47	15.5556	95.7447	4.19681	0.0004	0.0121288	Aats-phe|CG10628|CG5028|CG6439|Eno|Pgm|l(1)G0156
WTvssalm_72hAPF_log2FC>2	cellular_component	membrane-enclosed lumen(GO:0031974)	12	69	75	17.3913	92	6.01073	0	0.00623521	Adk2|Alas|CG1516|CG3731|CG5028|CG9065|Cyt-c-p|Mdh2|ND42|Sod2|kdn|l(1)G0156
WTvssalm_72hAPF_log2FC>2	biological_process	mesoderm development(GO:0007498)	6	73	75	8.21918	97.3333	2.03244	0.0362	0.516959	Ald|CG4945|Mlc1|Msp-300|Zasp66|meso18E
WTvssalm_72hAPF_log2FC>2	biological_process	metal ion homeostasis(GO:0055065)	5	30	33	16.6667	90.9091	3.74578	0.0024	0.0632429	Rya-r44F|Scox|fh|mfrn|sesB
WTvssalm_72hAPF_log2FC>2	molecular_function	metal Mfuzz Cluster binding(GO:0051540)	12	42	48	28.5714	87.5	8.51531	0	0.00623521	Acon|CG13623|CG3420|CG6345|CG9140|CG9172|CG9836|Las|ND23|ND75|RFeSP|SdhB
WTvssalm_72hAPF_log2FC>2	biological_process	metallo-sulfur Mfuzz Cluster assembly(GO:0031163)	3	7	10	42.8571	70	5.4658	0.0016	0.0433223	CG13623|CG9836|fh
WTvssalm_72hAPF_log2FC>2	molecular_function	metallochaperone activity(GO:0016530)	3	4	4	75	100	7.52472	0	0.00623521	CG9065|Scox|fh
WTvssalm_72hAPF_log2FC>2	molecular_function	metalloendopeptidase activity(GO:0004222)	7	74	82	9.45946	90.2439	2.61163	0.0132	0.280271	CG11771|CG14231|CG2658|CG3731|CG4169|CG5131|CG6512
WTvssalm_72hAPF_log2FC>2	UserSuppliedAssociations	Mfuzz Cluster13	34	256	256	13.2812	100	8.70691	0	0.000495	Adk2|Alas|CG10249|CG13026|CG14022|CG14619|CG1516|CG1657|CG16700|CG1885|CG33056|CG3964|CG42388|CG42666|CG43129|CG4733|CG5535|CR43628|CR43654|CR43959|Cks85A|CstF-50|FBgn0264908|FBgn0265345|FBgn0265590|FBgn0266412|FBgn0266745|Mical|Rya-r44F|Unc-89|cp309|larp|mfrn|sgg
WTvssalm_72hAPF_log2FC>2	UserSuppliedAssociations	Mfuzz Cluster14	14	183	183	7.65027	100	3.13668	0.0032	0.00565714	CG11418|CG15896|CG42390|CG43143|CR43836|Coq2|Ef1alpha100E|FBgn0265191|FBgn0265982|Msp-300|Nlg1|aret|clu|meso18E
WTvssalm_72hAPF_log2FC>2	UserSuppliedAssociations	Mfuzz Cluster22	95	351	351	27.0655	100	24.5798	0	0.000495	AQP|ATPsyn-gamma|Acon|Acsl|Act88F|Actn|Ald|CG10340|CG10561|CG11099|CG11412|CG11876|CG12091|CG12162|CG14168|CG14290|CG1824|CG18809|CG1970|CG32649|CG4169|CG42337|CG43078|CG4769|CG5028|CG5037|CG5214|CG5261|CG5903|CG5961|CG6020|CG6293|CG6439|CG6455|CG7430|CG7766|CG8206|CG8475|CG8768|CG9140|CG9231|CG9240|CG9836|Dot|Eno|FBgn0265045|FBgn0265356|FBgn0265380|FBgn0265991|FBgn0265998|FBgn0266377|FBgn0266967…
WTvssalm_72hAPF_log2FC>2	UserSuppliedAssociations	Mfuzz Cluster28	70	267	267	26.2172	100	20.5996	0	0.000495	CG1041|CG10710|CG11562|CG11771|CG11779|CG13144|CG13850|CG14231|CG14270|CG14613|CG14786|CG14881|CG14898|CG15336|CG15908|CG16787|CG16912|CG16935|CG1702|CG18136|CG18304|CG2453|CG2658|CG3337|CG33506|CG3420|CG34423|CG4553|CG4627|CG5131|CG5190|CG5705|CG6094|CG6106|CG6345|CG6404|CG6565|CG8010|ECSIT|EF-G2|Egm|EndoG|FBgn0265935|Pbgs|Rlc1|Scox|Updo|fh|ico|mRpL13|mRpL14|mRpL2|mRpL23|mRpL24|mRpL38|mRpL40|mRp…
WTvssalm_72hAPF_log2FC>2	UserSuppliedAssociations	Mfuzz Cluster3	94	373	373	25.2011	100	23.3583	0	0.000495	ATPsyn-Cf6|ATPsyn-b|ATPsyn-d|Adk1|CG10219|CG10320|CG10802|CG11321|CG11455|CG11752|CG12203|CG12400|CG12859|CG13365|CG13623|CG14482|CG14806|CG14997|CG15412|CG15771|CG15922|CG1746|CG1774|CG18317|CG30415|CG3192|CG3214|CG33054|CG3321|CG34242|CG34439|CG3446|CG3621|CG3683|CG3719|CG3731|CG43322|CG4692|CG4945|CG5010|CG5548|CG5703|CG6463|CG7394|CG7580|CG7598|CG7603|CG7630|CG7712|CG7834|CG8680|CG9034|CG9065…
WTvssalm_72hAPF_log2FC>2	UserSuppliedAssociations	Mfuzz Cluster39	69	334	334	20.6587	100	17.4608	0	0.000495	Aats-phe|CG10075|CG10628|CG11044|CG11617|CG11722|CG12736|CG12848|CG13018|CG13220|CG14130|CG14683|CG14757|CG14817|CG15456|CG15773|CG15912|CG17726|CG30373|CG30493|CG3608|CG42319|CG4462|CG4882|CG5569|CG5793|CG5989|CG6512|CG6574|CG6689|CG7277|CG7382|CG7920|CG8067|CG9249|CG9581|CG9640|CHES-1-like|COQ7|Cchl|EfTuM|Hmgs|Mal-B2|Pgm|Su(P)|Surf1|TFAM|Ttc19|betaTub97EF|blp|colt|l(2)tid|mRpL10|mRpL16|mRpL27|m…
WTvssalm_72hAPF_log2FC>2	molecular_function	microfilament motor activity(GO:0000146)	3	3	3	100	100	8.802	0	0.00623521	Mhc|Mlc1|Mlc2
WTvssalm_72hAPF_log2FC>2	cellular_component	microtubule associated complex(GO:0005875)	20	347	364	5.76369	95.3297	2.03656	0.0356	0.512524	ATPsyn-d|CG11876|CG1516|CG16935|CG3731|CG4169|CG5028|CG5214|CG6439|CG7834|Hsc70-1|Nc73EF|RFeSP|Rya-r44F|SdhB|blw|kdn|l(1)G0156|mRpS30|skap
WTvssalm_72hAPF_log2FC>2	UserSuppliedAssociations	microtubule_associated	30	512	519	5.85938	98.6513	3.04956	0.0022	0.00410943	ATPsyn-d|CG10249|CG11876|CG1516|CG16935|CG3731|CG4169|CG5028|CG5214|CG6439|CG7834|FBgn0265045|FBgn0265935|FBgn0265998|Hsc70-1|Nc73EF|Nek2|RFeSP|Rya-r44F|SdhB|TFAM|betaTub97EF|blw|clu|cp309|kdn|l(1)G0156|mRpS30|sgg|skap
WTvssalm_72hAPF_log2FC>2	cellular_component	mitochondrial part(GO:0044429)	137	357	383	38.3754	93.2115	35.1858	0	0.00623521	ATPsyn-Cf6|ATPsyn-b|ATPsyn-beta|ATPsyn-d|ATPsyn-gamma|Adk2|Alas|CG10219|CG10320|CG11455|CG11779|CG12203|CG12400|CG12859|CG14482|CG1516|CG1746|CG1824|CG18317|CG18809|CG1970|CG3192|CG3214|CG3321|CG34439|CG3446|CG3621|CG3683|CG3731|CG3803|CG4169|CG4692|CG4769|CG4908|CG5028|CG5037|CG5214|CG5261|CG5548|CG5703|CG6020|CG6404|CG6455|CG6463|CG7394|CG7430|CG7580|CG7598|CG7712|CG7834|CG8680|CG9065|CG9090|CG…
WTvssalm_72hAPF_log2FC>2	biological_process	mitochondrial transport(GO:0006839)	8	48	53	16.6667	90.566	4.74238	0	0.00623521	CG11779|CG18317|CG7394|Gpdh|Gpo-1|Ucp4A|colt|mfrn
WTvssalm_72hAPF_log2FC>2	biological_process	mitochondrion localization(GO:0051646)	3	13	14	23.0769	92.8571	3.68431	0.0074	0.174254	EndoG|clu|larp
WTvssalm_72hAPF_log2FC>2	biological_process	mitochondrion organization(GO:0007005)	5	48	57	10.4167	84.2105	2.45148	0.018	0.357336	EndoG|Marf|Pink1|larp|ttm50
WTvssalm_72hAPF_log2FC>2	cellular_component	mitochondrion(GO:0005739)	78	254	269	30.7087	94.4238	22.9889	0	0.00623521	ATPsyn-beta|ATPsyn-d|Aats-phe|Acon|Adk2|Alas|CG10320|CG10340|CG1041|CG10924|CG11876|CG12736|CG12859|CG14898|CG16912|CG16935|CG1970|CG2658|CG3192|CG32649|CG34423|CG3719|CG3731|CG4169|CG5028|CG5190|CG5548|CG5703|CG5705|CG6439|CG6455|CG6512|CG7834|COQ7|Cchl|CoIV|CoVIb|CoVa|CoVb|Cyt-c-p|EF-G2|EfTuM|EndoG|Gpo-1|Hsc70-1|Las|Mdh2|Men-b|Mer|ND23|ND42|ND75|Oscp|Pdsw|Pink1|RFeSP|Scox|SdhA|TFAM|blw|fh|gatA|…
WTvssalm_72hAPF_log2FC>2	UserSuppliedAssociations	MitoExplorer_all genes	260	1002	1065	25.9481	94.0845	40.6222	0	0.000495	ATPsyn-Cf6|ATPsyn-b|ATPsyn-beta|ATPsyn-d|ATPsyn-gamma|Aats-phe|Aats-ser|Acon|Acsl|Adk2|Alas|Ald|CG10075|CG10219|CG10320|CG10340|CG1041|CG10628|CG10924|CG11337|CG11418|CG11455|CG11562|CG11722|CG11752|CG11771|CG11779|CG11876|CG12091|CG12203|CG12400|CG12736|CG12848|CG12859|CG13163|CG13623|CG13850|CG14130|CG14231|CG14270|CG14290|CG14482|CG14613|CG14618|CG14757|CG14786|CG14806|CG14817|CG14898|CG14997|…
WTvssalm_72hAPF_log2FC>2	UserSuppliedAssociations	MitoExplorer_Apoptosis	8	45	47	17.7778	95.7447	5.27647	0.0002	0.000495	Adk2|CG14130|CG14806|CG5989|CG9231|Hsc70-1|l(2)tid|larp
WTvssalm_72hAPF_log2FC>2	UserSuppliedAssociations	MitoExplorer_Electron_Transport_Chain	99	186	192	53.2258	96.875	37.4697	0	0.000495	ATPsyn-Cf6|ATPsyn-b|ATPsyn-beta|ATPsyn-d|ATPsyn-gamma|CG10075|CG10219|CG10320|CG10340|CG11455|CG11562|CG11722|CG11752|CG12203|CG12400|CG12859|CG13850|CG14482|CG14757|CG14898|CG15908|CG1746|CG17726|CG18809|CG1970|CG3192|CG3214|CG32649|CG3321|CG3420|CG34423|CG34439|CG3446|CG3608|CG3621|CG3683|CG3731|CG3803|CG4169|CG4627|CG4692|CG4769|CG4908|CG5037|CG5548|CG5569|CG5703|CG6020|CG6404|CG6463|CG7580|CG…
WTvssalm_72hAPF_log2FC>2	UserSuppliedAssociations	MitoExplorer_Fatty_Acid_Metabolism	4	19	20	21.0526	95	4.20796	0.004	0.00694737	CG1041|CG1774|CG7920|colt
WTvssalm_72hAPF_log2FC>2	UserSuppliedAssociations	MitoExplorer_Fe-S_Mfuzz Cluster_biosynthesis	4	12	15	33.3333	80	5.67554	0	0.000495	CG13623|CG9836|fh|mfrn
WTvssalm_72hAPF_log2FC>2	UserSuppliedAssociations	MitoExplorer_Glycolysis	11	33	33	33.3333	100	9.41943	0	0.000495	Ald|Eno|FBgn0267385|Gapdh1|Hex-A|Pfk|Pgi|Pgk|Pglym78|Pgm|Tpi
WTvssalm_72hAPF_log2FC>2	UserSuppliedAssociations	MitoExplorer_Import_&_Sorting	10	67	74	14.9254	90.5405	5.16107	0	0.000495	CG11779|CG14270|CG1824|CG5010|CG7382|CG7394|CG8206|CG9240|blp|ttm50
WTvssalm_72hAPF_log2FC>2	UserSuppliedAssociations	MitoExplorer_Mitochondrial_Dynamics	9	42	43	21.4286	97.6744	6.39559	0	0.000495	CG2658|CG5903|CG6455|CG6512|CG7603|Marf|Pink1|l(3)03670|sesB
WTvssalm_72hAPF_log2FC>2	UserSuppliedAssociations	MitoExplorer_Pyruvate_Metabolism	6	21	24	28.5714	87.5	6.31387	0	0.000495	CG10924|CG11876|CG14290|CG5261|Men-b|l(1)G0334
WTvssalm_72hAPF_log2FC>2	UserSuppliedAssociations	MitoExplorer_ROS_Defense	5	25	31	20	80.6452	4.53928	0.0004	0.00092093	CG2022|CG33177|CG3719|FBgn0267376|Sod2
WTvssalm_72hAPF_log2FC>2	UserSuppliedAssociations	MitoExplorer_TCA_Cycle	13	28	29	46.4286	96.5517	12.4762	0	0.000495	Acon|CG12091|CG5028|CG5214|CG6439|CG7430|Mdh2|Nc73EF|Scsalpha|kdn|l(1)G0156|l(1)G0255|skap
WTvssalm_72hAPF_log2FC>2	UserSuppliedAssociations	MitoExplorer_Translation	61	180	189	33.8889	95.2381	22.5359	0	0.000495	Aats-phe|Aats-ser|CG10628|CG11337|CG11418|CG12736|CG12848|CG13163|CG14231|CG14618|CG14786|CG14817|CG15896|CG16912|CG4882|CG5190|CG5705|CG6094|EF-G2|EfTuM|Rlc1|gatA|ico|mRpL10|mRpL13|mRpL14|mRpL16|mRpL2|mRpL21|mRpL23|mRpL24|mRpL27|mRpL28|mRpL34|mRpL38|mRpL40|mRpL42|mRpL44|mRpL45|mRpL48|mRpL49|mRpL52|mRpL54|mRpL55|mRpL9|mRpS10|mRpS14|mRpS16|mRpS17|mRpS18C|mRpS22|mRpS24|mRpS25|mRpS30|mRpS33|mRpS34|m…
WTvssalm_72hAPF_log2FC>2	UserSuppliedAssociations	MitoExplorer_Ubiquinone_Biosynthesis	6	8	9	75	88.8889	11.0934	0	0.000495	CG2453|CG30493|CG7277|CG9249|COQ7|Coq2
WTvssalm_72hAPF_log2FC>2	UserSuppliedAssociations	MitoExplorer_Unknown	4	23	26	17.3913	88.4615	3.6674	0.0032	0.00565714	CG14613|CG15912|CG16787|c12.2
WTvssalm_72hAPF_log2FC>2	molecular_function	modified amino acid binding(GO:0072341)	3	9	9	33.3333	100	4.68961	0.0024	0.0632429	CG14694|CG6574|mtacp1
WTvssalm_72hAPF_log2FC>2	biological_process	muscle system process(GO:0003012)	5	17	19	29.4118	89.4737	5.59373	0.0002	0.00623521	Mhc|Mlc1|Mlc2|Rya-r44F|Tm1
WTvssalm_72hAPF_log2FC>2	biological_process	myofibril assembly(GO:0030239)	3	7	8	42.8571	87.5	5.4658	0.0012	0.0332025	Act88F|Mhc|wupA
WTvssalm_72hAPF_log2FC>2	molecular_function	NAD binding(GO:0051287)	10	37	40	27.027	92.5	7.49364	0	0.00623521	CG1970|CG5028|CG5703|CG6439|CG9140|Gapdh1|Gpdh|Men-b|Sirt4|l(1)G0156
WTvssalm_72hAPF_log2FC>2	molecular_function	NADH dehydrogenase activity(GO:0003954)	26	41	44	63.4146	93.1818	20.2124	0	0.00623521	CG10320|CG11455|CG12203|CG12400|CG12859|CG1970|CG3192|CG3214|CG3446|CG3621|CG3683|CG5548|CG5703|CG6020|CG6463|CG7712|CG8680|CG9140|CG9172|CG9306|ND23|ND42|ND75|Pdsw|l(2)35Di|l(3)neo18
WTvssalm_72hAPF_log2FC>2	molecular_function	oxidoreductase activity, acting on a heme group of donors(GO:0016675)	10	23	24	43.4783	95.8333	10.073	0	0.00623521	CG18809|CoIV|CoVIII|CoVIIc|CoVIb|CoVa|CoVb|Scox|cype|levy
WTvssalm_72hAPF_log2FC>2	molecular_function	oxidoreductase activity, acting on a sulfur group of donors(GO:0016667)	4	42	44	9.52381	95.4545	1.98641	0.0444	0.598353	CG3719|CG7430|CG9471|Su(P)
WTvssalm_72hAPF_log2FC>2	molecular_function	oxidoreductase activity, acting on NAD(P)H, quinone or similar compound as acceptor(GO:0016655)	23	36	38	63.8889	94.7368	19.0855	0	0.00623521	CG10320|CG12203|CG12400|CG12859|CG1970|CG3192|CG3214|CG3621|CG3683|CG5548|CG5703|CG6020|CG6463|CG7712|CG8680|CG9140|CG9172|CG9306|ND23|ND42|ND75|Pdsw|l(3)neo18
WTvssalm_72hAPF_log2FC>2	molecular_function	oxidoreductase activity, acting on the aldehyde or oxo group of donors, disulfide as acceptor(GO:0016624)	3	7	8	42.8571	87.5	5.4658	0.001	0.0282875	CG11876|Nc73EF|l(1)G0334
WTvssalm_72hAPF_log2FC>2	cellular_component	oxidoreductase complex(GO:1990204)	46	93	106	49.4624	87.7358	23.3868	0	0.00623521	CG10219|CG10320|CG11455|CG11876|CG12203|CG12400|CG12859|CG14482|CG1970|CG3192|CG3214|CG34439|CG3446|CG3621|CG3683|CG3731|CG4169|CG4769|CG5214|CG5261|CG5548|CG5703|CG6020|CG6463|CG7430|CG7580|CG7598|CG7712|CG8680|CG9140|CG9172|CG9306|Gpdh|Gpo-1|ND23|ND42|ND75|Nc73EF|Pdsw|RFeSP|SdhA|SdhB|SdhC|l(1)G0334|l(2)35Di|l(3)neo18
WTvssalm_72hAPF_log2FC>2	cellular_component	phosphorylase kinase complex(GO:0005964)	3	3	3	100	100	8.802	0	0.00623521	CG7766|CG8475|PhKgamma
WTvssalm_72hAPF_log2FC>2	biological_process	protein complex biogenesis(GO:0070271)	3	4	4	75	100	7.52472	0.0002	0.00623521	CG9172|Surf1|Ttc19
WTvssalm_72hAPF_log2FC>2	molecular_function	purine nucleoside binding(GO:0001883)	44	814	862	5.40541	94.4316	2.63476	0.017	0.342866	ATPsyn-beta|Aats-phe|Aats-ser|Act88F|Adk1|Adk2|CG10628|CG10802|CG10924|CG12736|CG1516|CG16912|CG1824|CG2658|CG31183|CG3608|CG3964|CG43143|CG4908|CG4945|CG6512|EF-G2|Ef1alpha100E|EfTuM|Fps85D|Hex-A|Hsc70-1|Marf|Mhc|ND42|Nek2|Pex1|Pfrx|PhKgamma|Pink1|Unc-89|betaTub97EF|blw|c12.2|ico|l(2)tid|sgg|skap|sqa
WTvssalm_72hAPF_log2FC>2	biological_process	pyruvate metabolic process(GO:0006090)	13	34	35	38.2353	97.1429	10.6376	0	0.00623521	Ald|CG11876|CG1516|CG5261|Eno|Gapdh1|Hex-A|Men-b|Pfk|Pgi|Pgk|Pglym78|l(1)G0334
WTvssalm_72hAPF_log2FC>2	molecular_function	quinone binding(GO:0048038)	3	6	6	50	100	5.9838	0.0002	0.00623521	CG1970|CG7580|CG9172
WTvssalm_72hAPF_log2FC>2	cellular_component	respiratory chain(GO:0070469)	6	17	17	35.2941	100	6.8749	0	0.00623521	CG12400|Cyt-c-p|ND42|ND75|RFeSP|mtacp1
WTvssalm_72hAPF_log2FC>2	biological_process	response to mechanical stimulus(GO:0009612)	3	16	18	18.75	88.8889	3.17379	0.0134	0.283159	Tpi|sesB|tko
WTvssalm_72hAPF_log2FC>2	biological_process	response to reactive oxygen species(GO:0000302)	3	9	9	33.3333	100	4.68961	0.0032	0.0830874	CG9172|fh|l(3)neo18
WTvssalm_72hAPF_log2FC>2	molecular_function	ribonucleotide binding(GO:0032553)	45	828	876	5.43478	94.5205	2.70594	0.0146	0.304878	ATPsyn-beta|Aats-phe|Aats-ser|Act88F|Adk1|Adk2|CG10628|CG10802|CG10924|CG12736|CG1516|CG16912|CG1824|CG2658|CG31183|CG3608|CG3964|CG43143|CG4908|CG4945|CG6512|CG9140|EF-G2|Ef1alpha100E|EfTuM|Fps85D|Hex-A|Hsc70-1|Marf|Mhc|ND42|Nek2|Pex1|Pfrx|PhKgamma|Pink1|Unc-89|betaTub97EF|blw|c12.2|ico|l(2)tid|sgg|skap|sqa
WTvssalm_72hAPF_log2FC>2	UserSuppliedAssociations	salm core 133 genes (Spletter et al, 2015)	86	131	133	65.6489	98.4962	39.2096	0	0.000495	ATPsyn-Cf6|ATPsyn-gamma|Acon|Act88F|CG10802|CG11562|CG12105|CG13144|CG13587|CG14168|CG14270|CG14482|CG14683|CG14757|CG15336|CG1746|CG17726|CG1774|CG1885|CG33054|CG33138|CG33177|CG34242|CG3608|CG3731|CG3964|CG42337|CG4627|CG4733|CG4769|CG4825|CG4882|CG5028|CG5190|CG5214|CG5261|CG6404|CG6439|CG6455|CG7430|CG7630|CG8067|CG9485|CG9640|Cht5|ECSIT|EfTuM|FBgn0265045|FBgn0266377|Gbs-76A|GlyP|Gpdh|Gpo-1|G…
WTvssalm_72hAPF_log2FC>2	UserSuppliedAssociations	salm core genes (Spletter et al, 2015)	130	710	742	18.3099	95.6873	22.3165	0	0.000495	ATPsyn-Cf6|ATPsyn-gamma|Acon|Act88F|CG10249|CG10802|CG11455|CG11562|CG12105|CG13144|CG13587|CG14168|CG14270|CG14482|CG14619|CG14683|CG14757|CG15336|CG16912|CG1746|CG17726|CG1774|CG18304|CG18317|CG1885|CG2658|CG30118|CG33054|CG33138|CG33177|CG34242|CG34439|CG3608|CG3731|CG3964|CG42319|CG42337|CG42390|CG43143|CG4627|CG4733|CG4769|CG4825|CG4882|CG5028|CG5190|CG5214|CG5261|CG6404|CG6439|CG6455|CG7430…
WTvssalm_72hAPF_log2FC>2	biological_process	sarcomere organization(GO:0045214)	4	20	21	20	95.2381	3.84445	0.0028	0.0733467	Actn|Mical|Unc-89|wupA
WTvssalm_72hAPF_log2FC>2	UserSuppliedAssociations	sarcomeric_proteins	16	76	77	21.0526	98.7013	6.78712	0	0.000413793	Act88F|Actn|CG14168|FBgn0265045|FBgn0265356|FBgn0265991|Lmpt|Mhc|Mlc1|Mlc2|Msp-300|Rya-r44F|Tm1|Unc-89|Zasp66|sals
WTvssalm_72hAPF_log2FC>2	biological_process	single-organism carbohydrate catabolic process(GO:0044724)	12	29	30	41.3793	96.6667	10.7167	0	0.00623521	Ald|Eno|Gapdh1|GlyP|Hex-A|Pfk|Pgi|Pgk|Pglym78|Pgm|PhKgamma|l(1)G0334
WTvssalm_72hAPF_log2FC>2	molecular_function	structural constituent of ribosome(GO:0003735)	40	176	178	22.7273	98.8764	13.4216	0	0.00623521	CG18304|Rlc1|mRpL10|mRpL13|mRpL14|mRpL16|mRpL2|mRpL21|mRpL23|mRpL24|mRpL27|mRpL28|mRpL34|mRpL38|mRpL40|mRpL42|mRpL44|mRpL45|mRpL48|mRpL49|mRpL52|mRpL54|mRpL55|mRpL9|mRpS10|mRpS14|mRpS16|mRpS17|mRpS18C|mRpS22|mRpS24|mRpS25|mRpS30|mRpS33|mRpS34|mRpS35|mRpS6|mRpS7|mRpS9|tko
WTvssalm_72hAPF_log2FC>2	molecular_function	succinate dehydrogenase (ubiquinone) activity(GO:0008177)	4	5	5	80	100	9.00355	0	0.00623521	CG10219|SdhA|SdhB|SdhC
WTvssalm_72hAPF_log2FC>2	molecular_function	succinate-CoA ligase activity(GO:0004774)	3	6	6	50	100	5.9838	0.001	0.0282875	Scsalpha|SdhA|skap
WTvssalm_72hAPF_log2FC>2	biological_process	sulfur compound metabolic process(GO:0006790)	5	55	59	9.09091	93.2203	2.10472	0.0282	0.510599	CG5261|CG7430|CG7920|Las|Mical
WTvssalm_72hAPF_log2FC>2	biological_process	synaptic growth at neuromuscular junction(GO:0051124)	3	24	24	12.5	100	2.27068	0.0416	0.57551	kay|sesB|sgg
WTvssalm_72hAPF_log2FC>2	biological_process	tetrapyrrole biosynthetic process(GO:0033014)	7	11	12	63.6364	91.6667	10.4925	0	0.00623521	Alas|CG1885|CG3803|CG5037|Pbgs|Updo|l(3)02640
WTvssalm_72hAPF_log2FC>2	molecular_function	transferase activity, transferring acyl groups, acyl groups converted into alkyl on transfer(GO:0046912)	3	6	6	50	100	5.9838	0.0006	0.0178268	Hmgs|Scsalpha|kdn
WTvssalm_72hAPF_log2FC>2	molecular_function	transferase activity, transferring alkyl or aryl (other than methyl) groups(GO:0016765)	6	58	59	10.3448	98.3051	2.66717	0.0116	0.255489	CG1702|CG33177|CG5037|Coq2|GstS1|l(3)02640
WTvssalm_72hAPF_log2FC>2	biological_process	transition metal ion transport(GO:0000041)	3	18	18	16.6667	100	2.89972	0.0184	0.36446	CG9065|Scox|mfrn
WTvssalm_72hAPF_log2FC>2	molecular_function	translation elongation factor activity(GO:0003746)	5	15	16	33.3333	93.75	6.05608	0	0.00623521	CG12736|EF-G2|Ef1alpha100E|EfTuM|ico
WTvssalm_72hAPF_log2FC>2	biological_process	translation(GO:0006412)	41	189	193	21.6931	97.9275	13.1601	0	0.00623521	CG12736|CG16912|CG18304|Ef1alpha100E|Rlc1|mRpL10|mRpL13|mRpL14|mRpL16|mRpL2|mRpL21|mRpL23|mRpL24|mRpL27|mRpL28|mRpL34|mRpL38|mRpL40|mRpL42|mRpL45|mRpL48|mRpL49|mRpL52|mRpL55|mRpL9|mRpS10|mRpS14|mRpS16|mRpS17|mRpS18C|mRpS22|mRpS24|mRpS25|mRpS30|mRpS33|mRpS34|mRpS35|mRpS6|mRpS7|mRpS9|tko
WTvssalm_72hAPF_log2FC>2	biological_process	translational elongation(GO:0006414)	5	19	19	26.3158	100	5.20129	0.0002	0.00623521	CG12736|EF-G2|Ef1alpha100E|EfTuM|ico
WTvssalm_72hAPF_log2FC>2	cellular_component	tricarboxylic acid cycle enzyme complex(GO:0045239)	6	13	14	46.1538	92.8571	8.07863	0	0.00623521	CG5214|CG7430|Nc73EF|Scsalpha|l(1)G0255|skap
WTvssalm_72hAPF_log2FC>2	biological_process	tricarboxylic acid cycle(GO:0006099)	17	38	41	44.7368	92.6829	13.3675	0	0.00623521	Acon|CG10219|CG5028|CG5214|CG6439|CG7430|Mdh2|Nc73EF|Scsalpha|SdhA|SdhB|SdhC|kdn|l(1)G0156|l(1)G0255|skap|spoon
WTvssalm_72hAPF_log2FC>2	biological_process	tRNA aminoacylation(GO:0043039)	4	42	43	9.52381	97.6744	1.98641	0.0442	0.597476	Aats-phe|Aats-ser|CG10802|CG16912
WTvssalm_72hAPF_log2FC>2	biological_process	visual behavior(GO:0007632)	3	20	20	15	100	2.6631	0.027	0.497002	Surf1|Ttc19|b
WTvssalm_72hAPF_log2FC>2	molecular_function	vitamin binding(GO:0019842)	5	41	56	12.1951	73.2143	2.86715	0.0102	0.228635	CG14694|CG2663|CG6574|Nc73EF|mtacp1

## Sheet: Mfuzz Clusters
Sample Gene Set	Ontology Type	Ontology Name(Ontology-ID)	Number Changed	Number Measured	Number in Ontology	Percent Changed	Percent Present	Z Score	PermuteP	AdjustedP	gene symbols
Mfuzz Cluster1	biological_process	aromatic amino acid family metabolic process(GO:0009072)	3	17	18	17.6471	94.4444	4.00785	0.008	1	CG9362|CG9547|y
Mfuzz Cluster1	molecular_function	carboxypeptidase activity(GO:0004180)	4	32	37	12.5	86.4865	3.63349	0.01	1	CG3108|CG4017|CG4678|Sp7
Mfuzz Cluster1	molecular_function	chitin binding(GO:0008061)	14	83	104	16.8675	79.8077	8.42808	0	0.0804909	CG12009|CG13643|CG13676|CG14301|CG14304|CG14608|CG32036|CG42296|CG8192|Cda4|obst-A|obst-B|serp|verm
Mfuzz Cluster1	biological_process	chitin metabolic process(GO:0006030)	15	96	117	15.625	82.0513	8.28595	0	0.0804909	CG12009|CG13643|CG13676|CG14301|CG14304|CG14608|CG32036|CG42296|CG8192|Cda4|obst-A|obst-B|rtv|serp|verm
Mfuzz Cluster1	biological_process	chitin-based cuticle development(GO:0040003)	5	57	72	8.77193	79.1667	3.0461	0.017	1	TwdlE|TwdlT|TwdlV|laccase2|rtv
Mfuzz Cluster1	molecular_function	cysteine-type peptidase activity(GO:0008234)	4	45	46	8.88889	97.8261	2.7553	0.0334	1	CG12717|CG13423|CG6337|CG6347
Mfuzz Cluster1	cellular_component	extracellular region(GO:0005576)	18	341	435	5.27859	78.3908	3.35186	0.003	0.787022	CG12009|CG13643|CG13676|CG14301|CG14304|CG14608|CG32036|CG32354|CG42296|CG8192|Cda4|Ilp4|Pxd|obst-A|obst-B|serp|verm|y
Mfuzz Cluster1	molecular_function	hydrolase activity, acting on carbon-nitrogen (but not peptide) bonds(GO:0016810)	7	82	91	8.53659	90.1099	3.52098	0.0076	1	CG10474|CG32750|CG8132|CRMP|Cda4|serp|verm
Mfuzz Cluster1	UserSuppliedAssociations	IFM72vs30h_log2FC>2	76	1537	1537	4.9447	100	5.44225	0	0.00393333	CG10175|CG12009|CG12164|CG12995|CG13028|CG13042|CG13284|CG13631|CG13643|CG13676|CG13720|CG13875|CG14257|CG14301|CG14304|CG14457|CG14515|CG14625|CG14892|CG14893|CG14946|CG15080|CG15414|CG15545|CG15615|CG15649|CG16786|CG16884|CG16885|CG16886|CG17127|CG2150|CG2663|CG30076|CG30101|CG30380|CG30427|CG30438|CG32036|CG32816|CG33299|CG34355|CG34382|CG34461|CG34462|CG3777|CG42331|CG42598|CG5928|CG6739|CG75…
Mfuzz Cluster1	cellular_component	integral component of endoplasmic reticulum membrane(GO:0030176)	3	9	10	33.3333	90	5.93286	0.0014	0.399858	Asph|Sras|l(2)not
Mfuzz Cluster1	cellular_component	integral component of plasma membrane(GO:0005887)	10	138	152	7.24638	90.7895	3.60232	0.0032	0.787022	CG1887|Osi1|Osi10|Osi12|Osi14|Osi3|Osi4|Osi6|Osi7|Sr-CII
Mfuzz Cluster1	molecular_function	ligase activity, forming carbon-oxygen bonds(GO:0016875)	7	41	42	17.0732	97.619	5.99562	0.0002	0.0804909	Aats-arg|Aats-leu|Aats-met|Aats-pro|CG4573|CG5414|CG6796
Mfuzz Cluster1	UserSuppliedAssociations	MitoExplorer_Fatty_Acid_Degradation	3	23	24	13.0435	95.8333	2.95428	0.02	0.109418	Aldh-III|CG4592|CG9547
Mfuzz Cluster1	UserSuppliedAssociations	MitoExplorer_Translation	13	180	189	7.22222	95.2381	3.58196	0.002	0.0196667	Aats-arg|Aats-leu|Aats-met|Aats-pro|CG13126|CG15390|CG15881|CG2100|CG4447|CG4573|CG5414|CG6796|KH1
Mfuzz Cluster1	molecular_function	oxidoreductase activity, acting on the aldehyde or oxo group of donors, NAD or NADP as acceptor(GO:0016620)	4	31	35	12.9032	88.5714	3.72022	0.01	1	Aldh-III|CG14893|CG30427|CG4770
Mfuzz Cluster1	molecular_function	structural constituent of chitin-based cuticle(GO:0005214)	16	107	139	14.9533	76.9784	8.30485	0	0.0804909	CG13670|CG34461|CG34462|CG7548|CG8541|Cpr100A|Cpr49Ah|Cpr50Ca|Cpr66Cb|Cpr66D|Cpr76Ba|Cpr76Bc|Cpr97Ea|TwdlE|TwdlT|TwdlV
Mfuzz Cluster1	molecular_function	sulfotransferase activity(GO:0008146)	3	15	17	20	88.2353	4.34893	0.007	1	St1|St2|pip
Mfuzz Cluster1	biological_process	tRNA aminoacylation for protein translation(GO:0006418)	7	42	43	16.6667	97.6744	5.89937	0.0002	0.0804909	Aats-arg|Aats-leu|Aats-met|Aats-pro|CG4573|CG5414|CG6796
Mfuzz Cluster1	UserSuppliedAssociations	WTvssalm_99hAPF_log2FC<-2	33	842	842	3.91924	100	1.98753	0.0496	0.225108	CG11380|CG13358|CG13737|CG14052|CG14515|CG14770|CG2150|CG30076|CG30101|CG33299|CG34221|CG34382|CG34461|CG5225|CG6272|CG7031|CG8331|Cpr66Cb|Desi|FBgn0266724|Hr46|Osi12|Osi6|RpL10|RpL39|TTLL3A|Tim9a|Tsp68C|Yp2|msta|nau|pip|sr
Mfuzz Cluster10	biological_process	aminoglycan catabolic process(GO:0006026)	3	28	32	10.7143	87.5	3.85906	0.009	1	Cht8|PGRP-SA|PGRP-SC2
Mfuzz Cluster10	molecular_function	anion transmembrane transporter activity(GO:0008509)	7	164	177	4.26829	92.6554	2.75773	0.0118	1	CG10413|CG13384|CG13796|CG5254|CG7091|Oatp30B|SerT
Mfuzz Cluster10	biological_process	defense response to bacterium(GO:0042742)	7	100	112	7	89.2857	4.33869	0.0008	0.416659	AttC|Cyp6a13|PGRP-SA|egr|grass|imd|nimB3
Mfuzz Cluster10	cellular_component	extracellular region part(GO:0044421)	9	270	399	3.33333	67.6692	2.31406	0.0214	1	Arpc3B|AttC|CG11852|CG18067|CG2444|CG30395|Gbp|Lsp1gamma|regucalcin
Mfuzz Cluster10	cellular_component	extracellular region(GO:0005576)	10	341	435	2.93255	78.3908	2.00882	0.0298	1	AttC|CG30197|Cht8|Lsp1gamma|Npc2a|PGRP-SA|PGRP-SC2|Tequila|fat-spondin|nimB3
Mfuzz Cluster10	molecular_function	G-protein coupled receptor activity(GO:0004930)	6	125	171	4.8	73.0994	2.88051	0.0132	1	CG31720|TrissinR|TyrR|hec|mthl14|mthl2
Mfuzz Cluster10	biological_process	G-protein coupled receptor signaling pathway(GO:0007186)	7	172	189	4.06977	91.0053	2.61563	0.0152	1	CG31720|CdsA|TrissinR|TyrR|hec|mthl14|mthl2
Mfuzz Cluster10	biological_process	Golgi vesicle transport(GO:0048193)	4	45	49	8.88889	91.8367	3.91647	0.0046	0.831192	KrT95D|Lerp|Syx6|ldlCp
Mfuzz Cluster10	molecular_function	heme binding(GO:0020037)	5	121	138	4.13223	87.6812	2.24336	0.0374	1	Cyp12d1-p|Cyp4p3|Cyp6a13|Cyp6d4|Irc
Mfuzz Cluster10	molecular_function	hydrolase activity, acting on carbon-nitrogen (but not peptide) bonds, in linear amides(GO:0016811)	3	46	55	6.52174	83.6364	2.67502	0.0266	1	PGRP-SA|PGRP-SC2|bwa
Mfuzz Cluster10	biological_process	innate immune response(GO:0045087)	6	71	83	8.4507	85.5422	4.63004	0	0.22135	Hf|PGRP-SA|PGRP-SC2|egr|grass|imd
Mfuzz Cluster10	cellular_component	integral component of membrane(GO:0016021)	31	928	1125	3.34052	82.4889	4.46167	0	0.22135	CG12355|CG13795|CG13796|CG17167|CG2781|CG31720|CG32250|CG32262|CG4562|CG7091|CG7816|CG8046|CG8602|CdsA|Lerp|Mdr50|Oatp30B|PGRP-SA|PGRP-SC2|SerT|Sply|TrissinR|Tsp42Ed|Tsp42Er|TyrR|ZnT35C|bwa|crq|hec|mthl14|mthl2
Mfuzz Cluster10	molecular_function	iron ion binding(GO:0005506)	5	123	156	4.06504	78.8462	2.20218	0.0402	1	Cyp12d1-p|Cyp4p3|Cyp6a13|Cyp6d4|Fer1HCH
Mfuzz Cluster10	biological_process	lipid biosynthetic process(GO:0008610)	5	114	122	4.38596	93.4426	2.3943	0.0306	1	CG2781|CdsA|Npc2a|Start1|qm
Mfuzz Cluster10	biological_process	lipid catabolic process(GO:0016042)	3	43	46	6.97674	93.4783	2.82469	0.022	1	CG11055|Sply|bwa
Mfuzz Cluster10	molecular_function	neurotransmitter(GO:0005328)	3	20	22	15	90.9091	4.79213	0.0024	0.717892	CG13795|CG13796|SerT
Mfuzz Cluster10	biological_process	organic hydroxy compound metabolic process(GO:1901615)	5	115	122	4.34783	94.2623	2.37205	0.029	1	CG11055|CG12539|CG34455|Pect|egr
Mfuzz Cluster10	biological_process	oxidation-reduction process(GO:0055114)	14	487	546	2.87474	89.1941	2.3146	0.0224	1	CG10131|CG12539|CG1544|CG18003|CG3999|CG5321|CG8046|CG9629|Cyp12d1-p|Cyp4p3|Cyp6a13|Cyp6d4|Fer1HCH|Irc
Mfuzz Cluster10	molecular_function	phosphatidylinositol binding(GO:0035091)	3	35	35	8.57143	100	3.30203	0.0124	1	Snx1|Snx16|Snx6
Mfuzz Cluster10	molecular_function	sequence-specific DNA binding(GO:0043565)	9	283	296	3.18021	95.6081	2.16203	0.022	1	ERR|Nf-YB|Ptx1|Pur-alpha|bin|cad|croc|repo|srp
Mfuzz Cluster10	molecular_function	steroid binding(GO:0005496)	4	19	21	21.0526	90.4762	6.7792	0	0.22135	CG1513|ERR|Npc2a|Start1
Mfuzz Cluster10	biological_process	steroid metabolic process(GO:0008202)	3	24	27	12.5	88.8889	4.27145	0.0046	0.831192	CG11055|Npc2a|Start1
Mfuzz Cluster10	UserSuppliedAssociations	transmembrane_proteins	62	2736	3089	2.26608	88.5724	3.50827	0.0008	0.0157333	CG10413|CG10866|CG11425|CG11880|CG12355|CG13012|CG13384|CG13795|CG13796|CG14205|CG14401|CG15098|CG17167|CG18095|CG18249|CG2023|CG2781|CG31105|CG31708|CG31717|CG31720|CG32250|CG32262|CG32599|CG32699|CG40006|CG4562|CG5276|CG5850|CG7091|CG7231|CG7816|CG8046|CG8602|CG8974|CR33013|CS-2|CdsA|Cyp6d4|FBgn0264751|Lerp|Mdr50|Mec2|Oatp30B|PGRP-SA|Rcd2|SerT|Sply|Start1|Syx6|TrissinR|Tsp42Ed|Tsp42Er|TyrR|ZnT3…
Mfuzz Cluster11	biological_process	'de novo' protein folding(GO:0006458)	4	12	13	33.3333	92.3077	8.52569	0.0002	0.08854	CG11267|Hsp60|l(3)01239|mgr
Mfuzz Cluster11	molecular_function	aminoacyl-tRNA ligase activity(GO:0004812)	7	41	42	17.0732	97.619	7.6739	0	0.08854	Aats-gln|Aats-thr|Aats-trp|Aats-tyr|CG33123|CG8257|Slimp
Mfuzz Cluster11	biological_process	cellular response to hypoxia(GO:0071456)	3	21	25	14.2857	84	4.49275	0.003	0.737833	Hr4|eIF2B-gamma|l(2)37Cc
Mfuzz Cluster11	molecular_function	chaperone binding(GO:0051087)	3	17	18	17.6471	94.4444	5.11948	0.0018	0.514103	CG1416|l(3)01239|mgr
Mfuzz Cluster11	cellular_component	cytoplasm(GO:0005737)	23	727	776	3.16369	93.6856	3.22043	0.0006	0.230974	AGO2|Aats-gln|Aats-thr|Aats-trp|Aats-tyr|Aprt|Art7|CG11134|CG11267|CG33123|CG4065|CG8257|Cbs|Eip63F-1|Gga|Hsp60|Mdh1|Mtr3|PpD3|Slimp|fs(1)Ya|l(2)37Cc|mgr
Mfuzz Cluster11	cellular_component	cytosol(GO:0005829)	5	95	98	5.26316	96.9388	2.72425	0.0076	1	Aven|Gcn2|Gga|Mdh1|eIF2B-gamma
Mfuzz Cluster11	molecular_function	enoyl-CoA hydratase activity(GO:0004300)	3	5	5	60	100	10.1366	0	0.08854	CG6984|CG8778|Mtpalpha
Mfuzz Cluster11	biological_process	establishment of protein localization to mitochondrion(GO:0072655)	3	30	32	10	93.75	3.54525	0.0078	1	CG33331|CG9393|Hsp60
Mfuzz Cluster11	molecular_function	flavin adenine dinucleotide binding(GO:0050660)	3	56	61	5.35714	91.8033	2.1423	0.0402	1	AIF|CG18519|CG6045
Mfuzz Cluster11	biological_process	intracellular protein transport(GO:0006886)	7	186	196	3.76344	94.898	2.22499	0.015	1	CG13887|CG33331|CG9393|Clbn|Gga|Hsp60|Srp72
Mfuzz Cluster11	cellular_component	lipid particle(GO:0005811)	10	240	250	4.16667	96	3.02583	0.0008	0.283328	CG11267|CG9577|Hsp60|Mdh1|Mtpalpha|Sucb|Trap1|l(2)03709|l(2)37Cc|yip2
Mfuzz Cluster11	cellular_component	membrane-enclosed lumen(GO:0031974)	5	69	75	7.24638	92	3.6034	0.0022	0.556537	AIF|CG11267|Dhod|Hsp60|P32
Mfuzz Cluster11	biological_process	methylation(GO:0032259)	3	60	65	5	92.3077	2.00229	0.049	1	Art7|CG1074|l(2)35Bd
Mfuzz Cluster11	cellular_component	microtubule associated complex(GO:0005875)	12	347	364	3.45821	95.3297	2.61457	0.0018	0.514103	Aats-gln|CG17556|CG30185|CG33123|CG3678|CG8778|Drp1|Hsp60|Mtpalpha|Pros28.1|l(2)37Cc|yip2
Mfuzz Cluster11	UserSuppliedAssociations	microtubule_associated	15	512	519	2.92969	98.6513	2.91483	0.0044	0.0370857	Aats-gln|CG17556|CG30185|CG33123|CG3678|CG8778|Drp1|Hsp60|Mtpalpha|Nat1|Pros28.1|crn|l(2)37Cc|toc|yip2
Mfuzz Cluster11	cellular_component	mitochondrial part(GO:0044429)	12	357	383	3.36134	93.2115	2.50849	0.0054	1	AIF|CG11267|CG33331|CG5924|CG9393|Dhod|Hsp60|Mtpalpha|P32|Ppox|Sucb|l(2)37Cc
Mfuzz Cluster11	biological_process	mitochondrial transport(GO:0006839)	3	48	53	6.25	90.566	2.46449	0.0288	1	CG33331|CG9393|Hsp60
Mfuzz Cluster11	biological_process	mitochondrion organization(GO:0007005)	5	48	57	10.4167	84.2105	4.71338	0.0004	0.160982	AIF|CG5924|Drp1|Hsp60|Slimp
Mfuzz Cluster11	cellular_component	mitochondrion(GO:0005739)	13	254	269	5.11811	94.4238	4.30882	0.0002	0.08854	AIF|CG11267|CG13551|CG5924|Coprox|Hsp60|Mtpalpha|P32|Slimp|Trap1|l(2)03709|l(2)37Cc|yip2
Mfuzz Cluster11	UserSuppliedAssociations	MitoExplorer_all genes	33	1002	1065	3.29341	94.0845	5.21424	0	0.0157333	AIF|Aats-gln|Aats-thr|CG10424|CG11267|CG13551|CG17680|CG31381|CG31643|CG31759|CG32281|CG33331|CG3603|CG4662|CG5924|CG6984|CG8257|CG8778|CG9393|CG9577|Coprox|Dhod|Drp1|Fpps|Hsp60|Mdh1|Mtpalpha|Ppox|Slimp|Sucb|Trap1|l(2)03709|l(2)37Cc
Mfuzz Cluster11	UserSuppliedAssociations	MitoExplorer_Apoptosis	3	45	47	6.66667	95.7447	2.95353	0.0246	0.0907125	AIF|Drp1|Trap1
Mfuzz Cluster11	UserSuppliedAssociations	MitoExplorer_Import_&_Sorting	4	67	74	5.97015	90.5405	3.12746	0.0164	0.0691143	CG11267|CG33331|CG9393|Hsp60
Mfuzz Cluster11	UserSuppliedAssociations	MitoExplorer_Translation	7	180	189	3.88889	95.2381	2.78887	0.0118	0.0535538	Aats-gln|Aats-thr|CG31381|CG31759|CG32281|CG8257|Slimp
Mfuzz Cluster11	biological_process	negative regulation of phosphorus metabolic process(GO:0010563)	3	36	37	8.33333	97.2973	3.10623	0.0136	1	CG13551|I-2|Ptpa
Mfuzz Cluster11	biological_process	nucleic acid transport(GO:0050657)	3	56	57	5.35714	98.2456	2.1423	0.0376	1	AGO2|Phax|Srp72
Mfuzz Cluster11	molecular_function	oxidoreductase activity, acting on CH-OH group of donors(GO:0016614)	5	112	121	4.46429	92.562	2.29975	0.0212	1	CG18519|CG3603|CG6045|Mdh1|Mtpalpha
Mfuzz Cluster11	molecular_function	oxidoreductase activity, acting on the CH-CH group of donors, oxygen as acceptor(GO:0016634)	3	11	11	27.2727	100	6.5993	0.0002	0.08854	Coprox|Dhod|Ppox
Mfuzz Cluster11	biological_process	pigment biosynthetic process(GO:0046148)	3	53	57	5.66038	92.9825	2.25583	0.0358	1	Aprt|Coprox|Ppox
Mfuzz Cluster11	biological_process	protein localization to mitochondrion(GO:0070585)	3	30	32	10	93.75	3.54525	0.0078	1	CG33331|CG9393|Hsp60
Mfuzz Cluster11	biological_process	RNA modification(GO:0009451)	3	40	43	7.5	93.0233	2.86449	0.0182	1	CG31381|CG32281|l(2)35Bd
Mfuzz Cluster11	UserSuppliedAssociations	RNA_binding_proteins	17	550	884	3.09091	62.2172	3.35452	0.0016	0.0157333	AGO2|Aats-tyr|CG15014|CG31140|CG31950|CG4806|CG5941|CG8635|CG8778|CG9004|Lsm11|Phax|Slimp|Srp72|crn|eIF2B-gamma|l(2)35Bd
Mfuzz Cluster11	molecular_function	S-adenosylmethionine-dependent methyltransferase activity(GO:0008757)	4	55	60	7.27273	91.6667	3.2301	0.0074	1	Art7|CG32281|l(2)35Bd|metl
Mfuzz Cluster11	biological_process	small molecule catabolic process(GO:0044282)	3	56	60	5.35714	93.3333	2.1423	0.0386	1	CG4390|Mtpalpha|yip2
Mfuzz Cluster11	cellular_component	spindle(GO:0005819)	3	53	55	5.66038	96.3636	2.25583	0.0398	1	Nat1|crn|toc
Mfuzz Cluster11	biological_process	sulfur amino acid metabolic process(GO:0000096)	3	13	14	23.0769	92.8571	5.99845	0.0004	0.160982	CG11134|CG32281|Cbs
Mfuzz Cluster11	biological_process	sulfur compound biosynthetic process(GO:0044272)	3	37	40	8.10811	92.5	3.04257	0.0148	1	CG11134|Cbs|beta4GalT7
Mfuzz Cluster11	molecular_function	transferase activity, transferring alkyl or aryl (other than methyl) groups(GO:0016765)	3	58	59	5.17241	98.3051	2.07079	0.0448	1	CG8005|Fpps|l(1)G0144
Mfuzz Cluster11	biological_process	tRNA aminoacylation for protein translation(GO:0006418)	7	42	43	16.6667	97.6744	7.56214	0	0.08854	Aats-gln|Aats-thr|Aats-trp|Aats-tyr|CG33123|CG8257|Slimp
Mfuzz Cluster11	molecular_function	unfolded protein binding(GO:0051082)	5	86	88	5.81395	97.7273	2.9895	0.006	1	CG11267|Hsp60|Trap1|l(3)01239|mgr
Mfuzz Cluster11	UserSuppliedAssociations	WTvssalm_30hAPF_log2FC>2	16	398	398	4.0201	100	4.42043	0	0.0157333	CG11267|CG13920|CG14543|CG33331|CG3663|CG5924|CG6045|CG8778|CG9987|Coprox|Hsp60|P32|Sclp|Sucb|l(2)37Cc|nst
Mfuzz Cluster12	biological_process	central nervous system development(GO:0007417)	7	79	82	8.86076	96.3415	4.59687	0.0026	1	SoxN|ct|elav|ewg|otp|pros|sim
Mfuzz Cluster12	biological_process	ecdysteroid biosynthetic process(GO:0045456)	3	13	14	23.0769	92.8571	5.6404	0.0024	1	Npc1a|phm|spok
Mfuzz Cluster12	molecular_function	endopeptidase inhibitor activity(GO:0004866)	5	65	97	7.69231	67.0103	3.46989	0.017	1	CG16704|CG31609|CG31778|TepI|cer
Mfuzz Cluster12	cellular_component	extrinsic component of plasma membrane(GO:0019897)	3	11	12	27.2727	91.6667	6.21453	0.0012	1	CG17760|G-oalpha47A|wrapper
Mfuzz Cluster12	molecular_function	growth factor activity(GO:0008083)	3	29	30	10.3448	96.6667	3.36827	0.0288	1	Actbeta|Pvf3|miple
Mfuzz Cluster12	UserSuppliedAssociations	IFM72vs30_log2FC<-2	51	1177	1177	4.33305	100	3.75655	0.0004	0.001475	CG11816|CG13053|CG13056|CG13905|CG15169|CG15478|CG17374|CG17562|CG17803|CG18636|CG30091|CG30383|CG31157|CG31525|CG32055|CG32182|CG32588|CG32971|CG3355|CG34163|CG34238|CG34247|CG42694|CG42792|CG42876|CG43059|CG43060|CG43076|CG4335|CG4650|CG5171|CG5322|CG7763|CG9989|CR43280|CR43620|CREG|FBgn0267112|FBgn0267153|FBgn0267674|Ir54a|Lcp4|Mur89F|Rpb11|TepI|TotB|TotZ|cuff|lmd|nerfin-1|sim
Mfuzz Cluster12	molecular_function	nucleic acid binding transcription factor activity(GO:0001071)	25	422	443	5.92417	95.2596	6.26826	0.0002	0.590267	CG32532|CG43689|Ets65A|Fer2|FoxP|HLH4C|Hmx|Lim1|Oli|RunxA|SoxN|Ubx|Vsx1|Vsx2|ct|ewg|ey|fd59A|lmd|otp|pros|run|sim|sv|toy
Mfuzz Cluster12	biological_process	organic hydroxy compound biosynthetic process(GO:1901617)	3	33	35	9.09091	94.2857	3.06179	0.0412	1	CG4335|phm|spok
Mfuzz Cluster12	molecular_function	sequence-specific DNA binding(GO:0043565)	15	283	296	5.30035	95.6081	4.31122	0.0018	1	CG32532|Ets65A|FoxP|Hmx|Lim1|Ubx|Vsx1|Vsx2|ct|ey|fd59A|otp|run|sim|toy
Mfuzz Cluster12	biological_process	sterol metabolic process(GO:0016125)	3	15	16	20	93.75	5.18004	0.0048	1	Npc1a|phm|spok
Mfuzz Cluster12	biological_process	synaptic vesicle exocytosis(GO:0016079)	3	19	21	15.7895	90.4762	4.47657	0.0088	1	Caps|Rph|unc-13
Mfuzz Cluster12	UserSuppliedAssociations	transcription_factors	35	732	754	4.78142	97.0822	3.66906	0	0.000842857	CG11093|CG17803|CG32532|CG43689|CG6254|CG6701|CG6765|CG7368|CG9650|CkIIalpha-i1|Ets65A|Fer2|FoxP|HLH4C|Hmx|Lim1|Lin29|Oli|RunxA|SoxN|Ubx|Vsx1|Vsx2|ct|ewg|ey|fd59A|lmd|nerfin-1|otp|pros|run|sim|sv|toy
Mfuzz Cluster12	biological_process	ventral cord development(GO:0007419)	4	32	33	12.5	96.9697	4.43911	0.006	1	G-oalpha47A|pros|run|sim
Mfuzz Cluster12	UserSuppliedAssociations	WTvssalm_30hAPF_log2FC<-2	95	471	471	20.1699	100	24.1159	0	0.000842857	ARY|Actbeta|CG11362|CG14316|CG14362|CG14556|CG15169|CG16964|CG17177|CG17374|CG17760|CG18063|CG18636|CG30325|CG31174|CG31287|CG31600|CG31778|CG31804|CG31909|CG32061|CG32141|CG32192|CG32219|CG32228|CG32259|CG32640|CG32652|CG32718|CG33252|CG33309|CG33310|CG33667|CG34107|CG34204|CG34206|CG34245|CG34258|CG34274|CG34292|CG40498|CG42263|CG42393|CG42446|CG42448|CG42535|CG42536|CG42691|CG42692|CG42694|CG4…
Mfuzz Cluster12	UserSuppliedAssociations	WTvssalm_72hAPF_log2FC<-2	96	583	583	16.4666	100	21.2812	0	0.000842857	Actbeta|CG13056|CG13962|CG14316|CG14321|CG14362|CG15478|CG16704|CG17177|CG17341|CG17684|CG17760|CG18063|CG30325|CG31174|CG31287|CG31525|CG31609|CG32055|CG32061|CG32192|CG32219|CG32228|CG32588|CG32640|CG32652|CG32718|CG33252|CG33667|CG34107|CG34204|CG34206|CG34247|CG34258|CG40498|CG42263|CG42393|CG42448|CG42535|CG42694|CG43049|CG43050|CG43059|CG43060|CG43076|CG43100|CG43133|CG43237|CG43290|CG43292…
Mfuzz Cluster12	UserSuppliedAssociations	WTvssalm_99hAPF_log2FC<-2	62	842	842	7.36342	100	8.81893	0	0.000842857	CG10799|CG11093|CG13053|CG13905|CG13962|CG1468|CG15168|CG15345|CG16704|CG17562|CG17684|CG17760|CG18636|CG2233|CG31142|CG31778|CG32182|CG32219|CG32241|CG32532|CG33120|CG33252|CG34163|CG34206|CG34247|CG42694|CG42787|CG42792|CG43060|CG43071|CG43085|CG43133|CG43144|CG43273|CG4335|CG4398|CG4650|CG5036|CG7227|CG8129|CG9837|CG9989|CR30009|CR32658|CR43685|FBgn0267112|Ilp3|Nca|Rad23|Rh7|Rpb11|SamDC|Srp9|T…
Mfuzz Cluster13	molecular_function	actin binding(GO:0003779)	6	111	119	5.40541	93.2773	2.61258	0.02	1	CG1812|CLIP-190|KLHL18|Mical|WASp|cora
Mfuzz Cluster13	molecular_function	amino acid transmembrane transporter activity(GO:0015171)	4	47	49	8.51064	95.9184	3.22826	0.0134	1	CG16700|CG5535|dmGlut|slif
Mfuzz Cluster13	biological_process	amino acid transport(GO:0006865)	4	37	39	10.8108	94.8718	3.87037	0.0058	1	CG16700|CG5535|dmGlut|slif
Mfuzz Cluster13	biological_process	autophagic cell death(GO:0048102)	7	70	71	10	98.5915	4.8431	0.0008	0.590267	CG11159|Eip74EF|eRF1|emp|ftz-f1|larp|santa-maria
Mfuzz Cluster13	molecular_function	calcium channel activity(GO:0005262)	4	26	27	15.3846	96.2963	4.92108	0.0012	0.66405	Ca-alpha1D|Ca-beta|Rya-r44F|trpgamma
Mfuzz Cluster13	molecular_function	calcium ion binding(GO:0005509)	8	198	213	4.0404	92.9577	2.11039	0.0332	1	CG11874|CG4733|CG7332|CanB2|Frq2|Miro|Rya-r44F|eys
Mfuzz Cluster13	biological_process	calcium ion transport(GO:0006816)	4	27	28	14.8148	96.4286	4.80198	0.0016	0.70832	Ca-alpha1D|Ca-beta|Rya-r44F|trpgamma
Mfuzz Cluster13	cellular_component	cation channel complex(GO:0034703)	4	23	24	17.3913	95.8333	5.32027	0.0012	0.66405	Ca-alpha1D|Ca-beta|Shal|qvr
Mfuzz Cluster13	biological_process	cell morphogenesis involved in differentiation(GO:0000904)	3	42	43	7.14286	97.6744	2.41249	0.0454	1	rk|sgg|slmb
Mfuzz Cluster13	molecular_function	choline dehydrogenase activity(GO:0008812)	3	13	15	23.0769	86.6667	5.4722	0.0022	0.721437	CG6142|CG9518|CG9521
Mfuzz Cluster13	cellular_component	cullin-RING ubiquitin ligase complex(GO:0031461)	3	28	33	10.7143	84.8485	3.32862	0.0162	1	Cks85A|KLHL18|slmb
Mfuzz Cluster13	cellular_component	cytosol(GO:0005829)	6	95	98	6.31579	96.9388	3.05583	0.0104	1	Mical|eIF4G|eIF5B|eRF1|larp|t
Mfuzz Cluster13	molecular_function	electron carrier activity(GO:0009055)	7	152	172	4.60526	88.3721	2.34912	0.0252	1	Cyp28c1|Cyp318a1|Cyp4d20|Cyp4e1|Cyp4g15|Cyp4s3|Cyp6u1
Mfuzz Cluster13	biological_process	embryo development(GO:0009790)	5	84	91	5.95238	92.3077	2.63147	0.025	1	Ca-alpha1D|Pp2B-14D|Top1|cora|tud
Mfuzz Cluster13	molecular_function	extracellular matrix structural constituent(GO:0005201)	3	27	28	11.1111	96.4286	3.41688	0.0164	1	Cg25C|eys|vkg
Mfuzz Cluster13	biological_process	female meiotic division(GO:0007143)	3	22	24	13.6364	91.6667	3.9358	0.0064	1	Pp2B-14D|sra|tacc
Mfuzz Cluster13	molecular_function	flavin adenine dinucleotide binding(GO:0050660)	4	56	61	7.14286	91.8033	2.78767	0.0196	1	CG6142|CG9518|CG9521|Mical
Mfuzz Cluster13	molecular_function	heme binding(GO:0020037)	7	121	138	5.78512	87.6812	3.03116	0.0068	1	Cyp28c1|Cyp318a1|Cyp4d20|Cyp4e1|Cyp4g15|Cyp4s3|Cyp6u1
Mfuzz Cluster13	UserSuppliedAssociations	IFM72vs30h_log2FC>2	166	1537	1537	10.8003	100	23.508	0	0.0101143	825-Oak|Adk2|Alas|Ast|CG10232|CG10407|CG10512|CG10585|CG10738|CG11000|CG11159|CG11686|CG11786|CG12519|CG12655|CG12769|CG13026|CG13051|CG13069|CG13183|CG13506|CG13627|CG13674|CG13678|CG13679|CG1368|CG13868|CG14022|CG14096|CG14274|CG14619|CG1516|CG15203|CG15528|CG15772|CG1657|CG16700|CG17190|CG17404|CG18765|CG1885|CG2145|CG2162|CG30377|CG31706|CG31808|CG32191|CG32214|CG32428|CG33056|CG33170|CG33263…
Mfuzz Cluster13	cellular_component	intrinsic component of membrane(GO:0031224)	29	954	1152	3.03983	82.8125	2.48681	0.0114	1	CG15020|CG32547|CG33639|CG42321|CG5130|CG7342|Mgat2|Miro|Osi15|Osi18|Osi19|Osi20|Pgam5|Rya-r44F|SIFR|Scgdelta|Shal|Snmp2|TM4SF|Teh3|Tsp42Eg|Tsp42Ei|dmGlut|emp|nAcRalpha-7E|qvr|rk|santa-maria|trpgamma
Mfuzz Cluster13	molecular_function	iron ion binding(GO:0005506)	7	123	156	5.69106	78.8462	2.98097	0.008	1	Cyp28c1|Cyp318a1|Cyp4d20|Cyp4e1|Cyp4g15|Cyp4s3|Cyp6u1
Mfuzz Cluster13	molecular_function	ligase activity, forming carbon-nitrogen bonds(GO:0016879)	5	92	101	5.43478	91.0891	2.39656	0.0282	1	CG1516|CG3964|CG7656|Hcs|Uba3
Mfuzz Cluster13	biological_process	locomotor rhythm(GO:0045475)	3	34	36	8.82353	94.4444	2.8753	0.0278	1	Pka-R2|sgg|slmb
Mfuzz Cluster13	cellular_component	membrane-enclosed lumen(GO:0031974)	4	69	75	5.7971	92	2.29014	0.0384	1	Adk2|Alas|CG1516|Gdh
Mfuzz Cluster13	cellular_component	membrane(GO:0016020)	32	1120	1284	2.85714	87.2274	2.25323	0.027	1	CG10738|CG11874|CG33145|CG42321|CG5535|Ca-alpha1D|Ca-beta|Cyp28c1|Cyp318a1|Cyp4d20|Cyp4e1|Cyp4g15|Cyp4s3|Cyp6u1|Mical|Miro|Rya-r44F|Shal|Snmp2|TM4SF|Tao|cora|dao|dmGlut|emp|eys|mfrn|nAcRalpha-7E|rk|santa-maria|slif|trpgamma
Mfuzz Cluster13	biological_process	negative regulation of developmental growth(GO:0048640)	4	39	40	10.2564	97.5	3.72466	0.0044	0.962391	Tao|WASp|sgg|wts
Mfuzz Cluster13	biological_process	negative regulation of nervous system development(GO:0051961)	4	54	56	7.40741	96.4286	2.87727	0.019	1	WASp|sgg|slmb|wts
Mfuzz Cluster13	biological_process	negative regulation of smoothened signaling pathway(GO:0045879)	3	16	16	18.75	100	4.82679	0.0042	0.962391	Uba3|sgg|slmb
Mfuzz Cluster13	biological_process	olfactory behavior(GO:0042048)	5	85	93	5.88235	91.3978	2.60062	0.0236	1	Spn|ftz-f1|sgg|slmb|sra
Mfuzz Cluster13	biological_process	organelle localization(GO:0051640)	4	48	52	8.33333	92.3077	3.17408	0.0098	1	Miro|grk|larp|tacc
Mfuzz Cluster13	biological_process	oxidation-reduction process(GO:0055114)	16	487	546	3.28542	89.1941	2.13191	0.0376	1	CG10512|CG3626|CG6142|CG7460|CG7914|CG9518|CG9521|Cyp28c1|Cyp318a1|Cyp4d20|Cyp4e1|Cyp4g15|Cyp4s3|Cyp6u1|Gdh|Mical
Mfuzz Cluster13	molecular_function	oxidoreductase activity, acting on paired donors, with incorporation or reduction of molecular oxygen(GO:0016705)	7	134	167	5.22388	80.2395	2.72182	0.0114	1	Cyp28c1|Cyp318a1|Cyp4d20|Cyp4e1|Cyp4g15|Cyp4s3|Cyp6u1
Mfuzz Cluster13	cellular_component	phosphatase complex(GO:1903293)	3	38	38	7.89474	100	2.62804	0.0388	1	CG3626|CanB2|Pp2B-14D
Mfuzz Cluster13	cellular_component	plasma membrane part(GO:0044459)	15	352	384	4.26136	91.6667	3.13963	0.0018	0.721437	Ca-alpha1D|Ca-beta|Osi15|Osi18|Osi19|Osi20|Scgdelta|Shal|cora|emp|if|jv|nAcRalpha-7E|qvr|santa-maria
Mfuzz Cluster13	molecular_function	protein kinase activity(GO:0004672)	10	259	271	3.861	95.572	2.21098	0.0264	1	CG10738|Pkc98E|Slob|Tao|Tie|Top1|Unc-89|bt|sgg|wts
Mfuzz Cluster13	molecular_function	protein kinase regulator activity(GO:0019887)	3	41	57	7.31707	71.9298	2.46382	0.0418	1	Cks85A|Pgam5|Pka-R2
Mfuzz Cluster13	biological_process	protein modification process(GO:0036211)	22	664	709	3.31325	93.653	2.56627	0.0124	1	CG10738|CG14619|CG15528|CG33145|CG3964|CanB2|Hcs|Mgat2|Mical|Patsas|Pgam5|Pka-R2|Pkc98E|Pp2B-14D|Tao|Tie|Top1|Uba3|Unc-89|bt|sgg|wts
Mfuzz Cluster13	molecular_function	protein phosphatase regulator activity(GO:0019888)	3	31	31	9.67742	100	3.08735	0.0186	1	CG3626|CG4733|CanB2
Mfuzz Cluster13	biological_process	regulation of circadian rhythm(GO:0042752)	3	39	40	7.69231	97.5	2.57149	0.0404	1	eys|qvr|sgg
Mfuzz Cluster13	biological_process	regulation of intracellular signal transduction(GO:1902531)	7	163	172	4.29448	94.7674	2.14646	0.0372	1	CG1657|NFAT|Tao|Unc-89|sgg|slmb|stck
Mfuzz Cluster13	biological_process	regulation of synaptic transmission(GO:0050804)	5	49	50	10.2041	98	4.15067	0.0034	0.937482	Frq2|NFAT|Slob|cdm|qvr
Mfuzz Cluster13	biological_process	regulation of transport(GO:0051049)	7	123	131	5.69106	93.8931	2.98097	0.0094	1	CG1657|Ca-alpha1D|Frq2|NFAT|Shal|sgg|slmb
Mfuzz Cluster13	biological_process	response to alcohol(GO:0097305)	3	22	24	13.6364	91.6667	3.9358	0.0068	1	Pkc98E|Tao|ftz-f1
Mfuzz Cluster13	molecular_function	RNA polymerase II transcription regulatory region sequence-specific DNA binding transcription factor activity involved in positive regulation of transcription(GO:0001228)	3	43	44	6.97674	97.7273	2.3627	0.0426	1	Eip74EF|Mrtf|ftz-f1
Mfuzz Cluster13	UserSuppliedAssociations	Salm core genes (Spletter et al 2015)	35	710	742	4.92958	95.6873	4.587	0	0.0101143	CG10249|CG13506|CG1368|CG14619|CG1578|CG16718|CG1885|CG2162|CG34196|CG3964|CG43707|CG4733|CG4829|CG4984|Cyp4e1|Cyp4g15|FBgn0264908|FBgn0266696|Rbp9|Rya-r44F|TM4SF|Top1|Unc-89|bt|ca|cp309|crc|eIF4G|eRF1|grk|mfrn|mrj|ps|sgg|tacc
Mfuzz Cluster13	biological_process	sarcomere organization(GO:0045214)	5	20	21	25	95.2381	7.40858	0	0.252971	CanB2|Mical|Scgdelta|Unc-89|bt
Mfuzz Cluster13	UserSuppliedAssociations	sarcomeric_proteins	7	76	77	9.21053	98.7013	3.89992	0.0004	0.00342857	CanB2|Rya-r44F|Scgdelta|Unc-89|WASp|bt|if
Mfuzz Cluster13	biological_process	sleep(GO:0030431)	4	25	27	16	92.5926	5.0467	0.0012	0.66405	CanB2|Pp2B-14D|inc|sra
Mfuzz Cluster13	molecular_function	structural constituent of chitin-based larval cuticle(GO:0008010)	5	31	43	16.129	72.093	5.67318	0.0006	0.53124	Ccp84Ad|Ccp84Ae|Ccp84Af|Ccp84Ag|Cpr64Ad
Mfuzz Cluster13	cellular_component	synapse part(GO:0044456)	7	113	122	6.19469	92.623	3.24277	0.0044	0.962391	CG16700|CanB2|Frq2|Mical|Rbp|Syt12|nAcRalpha-7E
Mfuzz Cluster13	biological_process	synaptic transmission(GO:0007268)	6	84	88	7.14286	95.4545	3.41901	0.0036	0.937482	Frq2|Miro|Rbp|Shal|Slob|cdm
Mfuzz Cluster13	molecular_function	voltage-gated cation channel activity(GO:0022843)	3	33	34	9.09091	97.0588	2.94314	0.029	1	Ca-alpha1D|Ca-beta|Shal
Mfuzz Cluster13	UserSuppliedAssociations	WTvssalm_72hAPF_log2FC>2	34	449	449	7.57238	100	7.34578	0	0.0101143	Adk2|Alas|CG10249|CG13026|CG14022|CG14619|CG1516|CG1657|CG16700|CG1885|CG33056|CG3964|CG42388|CG42666|CG43129|CG4733|CG5535|CR43628|CR43654|CR43959|Cks85A|CstF-50|FBgn0264908|FBgn0265345|FBgn0265590|FBgn0266412|FBgn0266745|Mical|Rya-r44F|Unc-89|cp309|larp|mfrn|sgg
Mfuzz Cluster14	molecular_function	acid-amino acid ligase activity(GO:0016881)	5	65	72	7.69231	90.2778	4.03422	0.0026	0.822157	HERC2|Mul1|UbcD4|morgue|park
Mfuzz Cluster14	molecular_function	actin binding(GO:0003779)	5	111	119	4.5045	93.2773	2.54459	0.0194	1	CG5984|Msp-300|beta-Spec|mim|shot
Mfuzz Cluster14	biological_process	actomyosin structure organization(GO:0031032)	3	48	51	6.25	94.1176	2.65129	0.0268	1	Msp-300|how|lilli
Mfuzz Cluster14	biological_process	apoptotic process(GO:0006915)	4	57	59	7.01754	96.6102	3.36188	0.0078	1	PDCD-5|Tak1|morgue|sav
Mfuzz Cluster14	biological_process	axonogenesis(GO:0007409)	3	52	54	5.76923	96.2963	2.47816	0.0312	1	Cdk5|beta-Spec|shot
Mfuzz Cluster14	biological_process	cell division(GO:0051301)	5	113	116	4.42478	97.4138	2.49854	0.0186	1	Dhc64C|aret|bol|how|lkb1
Mfuzz Cluster14	biological_process	cellular amino acid metabolic process(GO:0006520)	8	152	169	5.26316	89.9408	3.74842	0.0018	0.758914	Aats-asp|Aats-glupro|Aats-ile|CG10399|CG11334|CG6950|CG8043|Eip55E
Mfuzz Cluster14	biological_process	coenzyme biosynthetic process(GO:0009108)	3	48	52	6.25	92.3077	2.65129	0.0246	1	CG3714|CG8199|Coq2
Mfuzz Cluster14	cellular_component	cytoplasm(GO:0005737)	28	727	776	3.85144	93.6856	5.24213	0	0.35416	ATP7|Aats-asp|Aats-glupro|Aats-ile|Amph|CG11652|CG3714|CG8043|Dhc64C|Ef1alpha100E|Kap-alpha1|Kap-alpha3|Mlf|Msp-300|RagA|Rtnl1|bol|bor|clu|gig|how|htt|lkb1|park|sav|trus|viaf|vig
Mfuzz Cluster14	biological_process	establishment of organelle localization(GO:0051656)	5	119	128	4.20168	92.9688	2.3662	0.0236	1	Amph|Dhc64C|Msp-300|Nmd3|htt
Mfuzz Cluster14	cellular_component	fusome(GO:0045169)	4	34	34	11.7647	100	4.84258	0.0002	0.35416	Dhc64C|Rtnl1|beta-Spec|shot
Mfuzz Cluster14	molecular_function	GTP binding(GO:0005525)	6	161	172	3.72671	93.6047	2.2653	0.0208	1	CG10914|Ef1alpha100E|HBS1|Rab39|RagA|ltd
Mfuzz Cluster14	molecular_function	GTPase activity(GO:0003924)	5	138	144	3.62319	95.8333	1.99548	0.0374	1	Ef1alpha100E|HBS1|Rab39|RagA|ltd
Mfuzz Cluster14	molecular_function	guanyl-nucleotide exchange factor activity(GO:0005085)	3	56	58	5.35714	96.5517	2.32138	0.0394	1	CG43102|HERC2|Msp-300
Mfuzz Cluster14	molecular_function	heme binding(GO:0020037)	5	121	138	4.13223	87.6812	2.3239	0.0256	1	CG11257|CG7280|Gyc88E|HERC2|Pxn
Mfuzz Cluster14	biological_process	immune effector process(GO:0002252)	3	42	45	7.14286	93.3333	2.94965	0.0168	1	Cdk5|Dhc64C|Tak1
Mfuzz Cluster14	molecular_function	ligase activity, forming carbon-oxygen bonds(GO:0016875)	3	41	42	7.31707	97.619	3.00485	0.0146	1	Aats-asp|Aats-glupro|Aats-ile
Mfuzz Cluster14	UserSuppliedAssociations	MitoExplorer_Amino_Acid_Metabolism	5	58	63	8.62069	92.0635	4.8273	0.0008	0.00524444	CG10399|CG5044|CG6950|CG7280|CG8199
Mfuzz Cluster14	molecular_function	mRNA 3'-UTR binding(GO:0003730)	3	21	24	14.2857	87.5	4.7414	0.002	0.804909	Vps36|aret|how
Mfuzz Cluster14	biological_process	neuromuscular synaptic transmission(GO:0007274)	3	33	35	9.09091	94.2857	3.52263	0.0114	1	Sgt|Upf2|beta-Spec
Mfuzz Cluster14	biological_process	neuron recognition(GO:0008038)	3	59	61	5.08475	96.7213	2.21289	0.0434	1	Ptp99A|beta-Spec|shot
Mfuzz Cluster14	cellular_component	nuclear pore(GO:0005643)	3	33	34	9.09091	97.0588	3.52263	0.0072	1	CG14749|Kap-alpha1|Kap-alpha3
Mfuzz Cluster14	biological_process	nuclear transport(GO:0051169)	4	70	72	5.71429	97.2222	2.84044	0.017	1	CG14749|Kap-alpha1|Kap-alpha3|Nmd3
Mfuzz Cluster14	biological_process	organelle localization(GO:0051640)	3	48	52	6.25	92.3077	2.65129	0.0298	1	Dhc64C|Msp-300|clu
Mfuzz Cluster14	biological_process	positive regulation of cell communication(GO:0010647)	5	130	136	3.84615	95.5882	2.14356	0.0318	1	Pk92B|Socs44A|Tak1|beta-Spec|ebd1
Mfuzz Cluster14	biological_process	positive regulation of cell cycle process(GO:0090068)	3	9	10	33.3333	90	7.73928	0	0.35416	Dhc64C|aret|bol
Mfuzz Cluster14	biological_process	positive regulation of nuclear division(GO:0051785)	3	6	6	50	100	9.63061	0	0.35416	Dhc64C|aret|bol
Mfuzz Cluster14	biological_process	positive regulation of phosphorylation(GO:0042327)	3	43	44	6.97674	97.7273	2.89616	0.0232	1	Pk92B|Tak1|raptor
Mfuzz Cluster14	biological_process	positive regulation of signaling(GO:0023056)	5	129	135	3.87597	95.5556	2.16283	0.0312	1	Pk92B|Socs44A|Tak1|beta-Spec|ebd1
Mfuzz Cluster14	biological_process	posttranscriptional regulation of gene expression(GO:0010608)	5	116	124	4.31034	93.5484	2.43131	0.0186	1	Mlf|aret|bol|bru-2|vig
Mfuzz Cluster14	molecular_function	protein transporter activity(GO:0008565)	3	55	60	5.45455	91.6667	2.3592	0.04	1	Kap-alpha1|Kap-alpha3|Ranbp11
Mfuzz Cluster14	biological_process	protein ubiquitination(GO:0016567)	3	42	48	7.14286	87.5	2.94965	0.019	1	HERC2|morgue|park
Mfuzz Cluster14	cellular_component	proteinaceous extracellular matrix(GO:0005578)	3	42	55	7.14286	76.3636	2.94965	0.0152	1	CG6232|Pxn|Tig
Mfuzz Cluster14	biological_process	regulation of cell growth(GO:0001558)	3	43	44	6.97674	97.7273	2.89616	0.0184	1	RagA|gig|shot
Mfuzz Cluster14	biological_process	regulation of organ morphogenesis(GO:2000027)	3	58	59	5.17241	98.3051	2.24826	0.0406	1	Mbs|Mlf|morgue
Mfuzz Cluster14	biological_process	response to hypoxia(GO:0001666)	4	44	50	9.09091	88	4.06984	0.0028	0.833318	Gyc88E|Mrp4|Sur|gig
Mfuzz Cluster14	UserSuppliedAssociations	RNA_binding_proteins	19	550	884	3.45455	62.2172	4.42736	0	0.00393333	CG11418|CG11444|CG11505|CG7849|Ef1alpha100E|HBS1|Nab2|Nmd3|Upf2|Vps36|aret|bol|bru-2|clu|eIF2B-delta|how|qkr58E-2|swm|vig
Mfuzz Cluster14	UserSuppliedAssociations	RNAi phenotype in muscle (Schnorrer et al 2010)	43	2028	2121	2.12032	95.6153	3.41904	0.002	0.00983333	Aats-asp|Aats-glupro|Aats-ile|CG10209|CG11505|CG14749|CG30338|CG32813|CG33230|CG43143|CG7135|CG7183|CG7429|CG7770|CG7849|CG7987|CG8136|Cdk12|Cf2|Ef1alpha100E|Eip55E|Elongin-B|HBS1|Kap-alpha3|Max|Mpp6|Nmd3|Pk92B|Pxn|Ssu72|Ubp64E|Vps36|aret|bor|clu|eIF2B-delta|how|raptor|sav|so|swm|trus|zormin
Mfuzz Cluster14	UserSuppliedAssociations	Salm core genes (Spletter et al 2015)	22	710	742	3.09859	95.6873	4.21942	0.0006	0.00505714	Aats-asp|Amph|CG10311|CG11505|CG14480|CG42390|CG43143|CG6454|FBgn0265191|FBgn0266448|Mbs|Mct1|Msp-300|Rtnl1|Tak1|aret|beta-Spec|how|lkb1|meso18E|mim|shot
Mfuzz Cluster14	biological_process	somatic muscle development(GO:0007525)	3	41	43	7.31707	95.3488	3.00485	0.0182	1	Cf2|ebd1|how
Mfuzz Cluster14	biological_process	sulfur compound metabolic process(GO:0006790)	4	55	59	7.27273	93.2203	3.45597	0.008	1	CG11334|CG7280|CG8199|Eip55E
Mfuzz Cluster14	cellular_component	synapse(GO:0045202)	3	56	57	5.35714	98.2456	2.32138	0.0444	1	Amph|Nlg1|beta-Spec
Mfuzz Cluster14	molecular_function	translation factor activity, nucleic acid binding(GO:0008135)	4	74	77	5.40541	96.1039	2.70473	0.0176	1	Ef1alpha100E|HBS1|clu|eIF2B-delta
Mfuzz Cluster14	molecular_function	ubiquitin-protein transferase activity(GO:0004842)	5	79	88	6.32911	89.7727	3.46393	0.0052	1	HERC2|UbcD4|morgue|park|poe
Mfuzz Cluster14	UserSuppliedAssociations	WTvssalm_24hAPF_log2FC>2	5	49	49	10.2041	100	5.3999	0.001	0.00536364	CG32121|CG42390|NT5E-2|aret|zormin
Mfuzz Cluster14	UserSuppliedAssociations	WTvssalm_30hAPF_log2FC>2	22	398	398	5.52764	100	7.40348	0	0.00393333	Aats-asp|Amph|CG10311|CG10399|CG10914|CG11418|CG12304|CG15766|CG15896|CG1648|CG2034|CG3714|CG42390|CG6983|CG7280|CG7849|CG8199|Coq2|Tig|aret|bru-2|viaf
Mfuzz Cluster14	UserSuppliedAssociations	WTvssalm_72hAPF_log2FC>2	14	449	449	3.11804	100	3.34387	0.0008	0.00524444	CG11418|CG15896|CG42390|CG43143|CR43836|Coq2|Ef1alpha100E|FBgn0265191|FBgn0265982|Msp-300|Nlg1|aret|clu|meso18E
Mfuzz Cluster15	biological_process	alpha-amino acid metabolic process(GO:1901605)	5	87	101	5.74713	86.1386	3.17655	0.0094	1	CG6188|CG6385|CG7860|Oat|yellow-f
Mfuzz Cluster15	cellular_component	cytosol(GO:0005829)	4	95	98	4.21053	96.9388	2.10395	0.0498	1	Jupiter|Tango2|Vps16A|ric8a
Mfuzz Cluster15	biological_process	defense response to other organism(GO:0098542)	8	117	132	6.83761	88.6364	4.64871	0	0.196756	AttD|CG6639|Lectin-galC1|PGRP-SD|Spn1|dro5|edin|r2d2
Mfuzz Cluster15	biological_process	developmental programmed cell death(GO:0010623)	5	96	97	5.20833	98.9691	2.90942	0.0172	1	Atg7|CG7860|Obp99b|cathD|p53
Mfuzz Cluster15	molecular_function	endopeptidase inhibitor activity(GO:0004866)	5	65	97	7.69231	67.0103	4.01483	0.0026	1	CG15369|CG31777|CG3604|Spn1|Spn88Eb
Mfuzz Cluster15	cellular_component	extracellular region(GO:0005576)	10	341	435	2.93255	78.3908	2.09507	0.0228	1	AttD|CG32698|CG8100|Ilp6|Lsp1alpha|Lsp1beta|Obp99b|PGRP-SD|edin|yellow-f
Mfuzz Cluster15	molecular_function	hormone activity(GO:0005179)	3	46	55	6.52174	83.6364	2.73081	0.0294	1	CCHa2|Ilp6|Ptth
Mfuzz Cluster15	biological_process	humoral immune response(GO:0006959)	5	78	83	6.41026	93.9759	3.4818	0.0056	1	AttD|Lectin-galC1|LysX|edin|fon
Mfuzz Cluster15	UserSuppliedAssociations	IFM72vs30_log2FC<-2	50	1177	1177	4.24809	100	7.76169	0	0.0219143	AttD|CCHa2|CG10621|CG10814|CG11370|CG11376|CG11459|CG11920|CG12288|CG12643|CG14118|CG17219|CG18446|CG18557|CG30083|CG30287|CG31337|CG31606|CG34213|CG34296|CG34330|CG4269|CG43335|CG43336|CG6385|CG6639|CG6660|CG7224|CG7442|CG7860|CG8791|Cyp309a2|FBgn0264748|FBgn0267113|Jhe|Oat|Obp99b|PGRP-SD|Pdfr|Ptth|Sema-1a|Spn1|Spn88Eb|Tango2|Tif-IA|Tsp42Ep|fabp|kon|neur|nimC2
Mfuzz Cluster15	cellular_component	larval serum protein complex(GO:0005616)	3	5	5	60	100	10.5697	0	0.196756	CG8100|Lsp1alpha|Lsp1beta
Mfuzz Cluster15	cellular_component	lipid particle(GO:0005811)	9	240	250	3.75	96	2.78498	0.0076	1	CG42351|CG5958|Cyp4d1|Fbp1|Fbp2|Lsp1alpha|Lsp1beta|Spat|fon
Mfuzz Cluster15	cellular_component	mitochondrial matrix(GO:0005759)	3	53	57	5.66038	92.9825	2.42388	0.0362	1	CG3107|Oat|Spat
Mfuzz Cluster15	molecular_function	nutrient reservoir activity(GO:0045735)	3	5	6	60	83.3333	10.5697	0	0.196756	Fbp2|Lsp1alpha|Lsp1beta
Mfuzz Cluster15	biological_process	olfactory behavior(GO:0042048)	4	85	93	4.70588	91.3978	2.35998	0.0346	1	Obp99b|cpo|mura|neur
Mfuzz Cluster15	molecular_function	oxidoreductase activity, acting on paired donors, with incorporation or reduction of molecular oxygen(GO:0016705)	6	134	167	4.47761	80.2395	2.7554	0.0136	1	CG10814|Cyp304a1|Cyp309a1|Cyp309a2|Cyp4d1|Ho
Mfuzz Cluster15	molecular_function	oxidoreductase activity, acting on the CH-OH group of donors, NAD or NADP as acceptor(GO:0016616)	4	77	81	5.19481	95.0617	2.59351	0.0236	1	CG10962|CG12116|CG1236|Fbp2
Mfuzz Cluster15	molecular_function	oxygen transporter activity(GO:0005344)	4	8	8	50	100	11.0839	0	0.196756	CG8100|Fbp1|Lsp1alpha|Lsp1beta
Mfuzz Cluster15	molecular_function	peptidase activity, acting on L-amino acid peptides(GO:0070011)	22	502	593	4.38247	84.6543	5.25886	0	0.196756	Ance-4|CG11459|CG14523|CG1773|CG18557|CG30083|CG30090|CG30287|CG3107|CG33462|CG42370|CG43335|CG43336|CG4408|CG4572|CG4580|CG4968|CG6639|CG8539|Mmp2|Rpn2|cathD
Mfuzz Cluster15	biological_process	pigment metabolic process(GO:0042440)	4	92	99	4.34783	92.9293	2.17713	0.0408	1	CG11376|Cnx99A|Ho|yellow-f
Mfuzz Cluster15	biological_process	proteolysis(GO:0006508)	22	567	663	3.88007	85.5204	4.61224	0	0.196756	Ance-4|CG11459|CG14523|CG1773|CG18557|CG30083|CG30090|CG30287|CG3107|CG33462|CG42370|CG43335|CG43336|CG4408|CG4572|CG4580|CG6639|CG8539|Mmp2|Rpn2|Uch|cathD
Mfuzz Cluster15	biological_process	RNA modification(GO:0009451)	3	40	43	7.5	93.0233	3.04699	0.02	1	CG3434|CG3709|RluA-2
Mfuzz Cluster15	UserSuppliedAssociations	WTvssalm_99hAPF_log2FC<-2	51	842	842	6.05701	100	10.8258	0	0.0219143	AttD|CCHa2|CG10621|CG11370|CG11459|CG11920|CG11985|CG12129|CG13607|CG14135|CG15369|CG16926|CG17244|CG18446|CG2082|CG30008|CG31337|CG31606|CG31636|CG3397|CG3709|CG42370|CG4269|CG43114|CG4408|CG4500|CG5142|CG6188|CG6385|CG6639|CG6660|CG8100|CG8791|Cyp304a1|Cyp309a1|Cyp309a2|Cyp4d1|FBgn0267113|Fbp1|Fbp2|Ilp6|Jhe|Lsp1alpha|Lsp1beta|LysX|Obp99b|Spn88Eb|Tsp42Ek|Tsp42Ep|dro5|edin
Mfuzz Cluster16	biological_process	'de novo' protein folding(GO:0006458)	4	12	13	33.3333	92.3077	4.80026	0.0014	0.104165	CG9920|Hsp60B|Hsp60C|Hsp60D
Mfuzz Cluster16	molecular_function	acid-amino acid ligase activity(GO:0016881)	14	65	72	21.5385	90.2778	6.61465	0	0.0260412	CG10254|CG16716|CG16833|CG2543|CG2574|CG31773|CG42797|CG5823|CG5987|CG9014|TTLL3B|Ube3a|ctrip|hyd
Mfuzz Cluster16	molecular_function	alkali metal ion binding(GO:0031420)	4	6	7	66.6667	85.7143	7.32028	0	0.0260412	CG11249|CG2964|CG7362|CG9624
Mfuzz Cluster16	biological_process	amide biosynthetic process(GO:0043604)	3	17	19	17.6471	89.4737	2.60252	0.0446	1	CG2543|CG31773|SMSr
Mfuzz Cluster16	molecular_function	aminopeptidase activity(GO:0004177)	10	46	49	21.7391	93.8776	5.6248	0	0.0260412	CG32454|CG7653|S-Lap1|S-Lap2|S-Lap3|S-Lap4|S-Lap5|S-Lap7|S-Lap8|loopin-1
Mfuzz Cluster16	molecular_function	anion(GO:0015301)	3	10	10	30	100	3.8745	0.0114	0.476111	Ant2|CG18418|CG7514
Mfuzz Cluster16	molecular_function	ATPase activity, coupled(GO:0042623)	22	297	312	7.40741	95.1923	2.42022	0.0254	0.806063	CG10859|CG11703|CG1494|CG1571|CG17150|CG1724|CG1801|CG34435|CG6230|CG9313|CG9323|CG9492|Dhc16F|Dhc36C|Dhc62B|Dhc98D|Hsp60B|Tim17b2|Vha36-2|Vha68-3|didum|robl37BC
Mfuzz Cluster16	cellular_component	axonemal dynein complex(GO:0005858)	6	11	14	54.5455	78.5714	7.98018	0	0.0260412	CG9492|Dhc16F|Dhc36C|Dhc62B|Dhc98D|Sdic1
Mfuzz Cluster16	biological_process	axoneme assembly(GO:0035082)	4	10	11	40	90.9091	5.39573	0.0014	0.104165	Mst84Db|Mst84Dc|Mst84Dd|TTLL3B
Mfuzz Cluster16	molecular_function	carbohydrate kinase activity(GO:0019200)	7	15	15	46.6667	100	7.85244	0	0.0260412	CG12289|CG17010|CG3544|CG7335|CG7551|Hex-t1|Hex-t2
Mfuzz Cluster16	molecular_function	dicarboxylic acid transmembrane transporter activity(GO:0005310)	3	14	16	21.4286	87.5	3.04218	0.0262	0.828481	CG18418|CG7514|Dic3
Mfuzz Cluster16	biological_process	establishment of protein localization to mitochondrion(GO:0072655)	9	30	32	30	93.75	6.71758	0	0.0260412	CG1724|CG5327|Hsp60B|Hsp60C|Hsp60D|Tim17a2|Tim17b2|Tom70|tomboy40
Mfuzz Cluster16	molecular_function	fumarate hydratase activity(GO:0004333)	3	4	4	75	100	6.7779	0.0006	0.0596899	CG31874|CG4095|CG6140
Mfuzz Cluster16	biological_process	fumarate metabolic process(GO:0006106)	3	6	6	50	100	5.35678	0.0018	0.126486	CG31874|CG4095|CG6140
Mfuzz Cluster16	cellular_component	glycerol-3-phosphate dehydrogenase complex(GO:0009331)	4	8	8	50	100	6.1861	0.0004	0.0431902	CG2137|CG43343|CG7311|Dhc36C
Mfuzz Cluster16	biological_process	glycerol-3-phosphate metabolic process(GO:0006072)	4	11	11	36.3636	100	5.07917	0.001	0.0835283	CG2137|CG43343|CG7311|Dhc36C
Mfuzz Cluster16	biological_process	glycolytic process(GO:0006096)	11	25	26	44	96.1538	9.50066	0	0.0260412	CG11249|CG13334|CG2964|CG5432|CG7024|CG7362|CG9624|CG9961|Hex-t1|Hex-t2|Pglym87
Mfuzz Cluster16	molecular_function	intramolecular transferase activity, phosphotransferases(GO:0016868)	3	8	8	37.5	100	4.48548	0.0038	0.212944	CG10202|Pglym87|Pmm45A
Mfuzz Cluster16	molecular_function	isocitrate dehydrogenase (NAD+) activity(GO:0004449)	3	6	6	50	100	5.35678	0.0014	0.104165	CG32026|CG3483|CG7755
Mfuzz Cluster16	molecular_function	magnesium ion binding(GO:0000287)	8	45	47	17.7778	95.7447	4.28246	0.0016	0.116118	CG11249|CG2964|CG32026|CG3483|CG7362|CG7755|CG9624|Pmm45A
Mfuzz Cluster16	biological_process	male gamete generation(GO:0048232)	11	80	97	13.75	82.4742	3.9809	0.0008	0.07456	Hsp60C|Mst84Db|Mst84Dc|Mst84Dd|Mst87F|bgcn|exu|gdl|gskt|hyd|xmas-1
Mfuzz Cluster16	biological_process	male meiosis(GO:0007140)	4	29	31	13.7931	93.5484	2.40184	0.0498	1	PI31|bgcn|fzr2|wa-cup
Mfuzz Cluster16	molecular_function	manganese ion binding(GO:0030145)	9	18	19	50	94.7368	9.2838	0	0.0260412	CG32454|S-Lap1|S-Lap2|S-Lap3|S-Lap4|S-Lap5|S-Lap7|S-Lap8|loopin-1
Mfuzz Cluster16	molecular_function	metal cluster binding(GO:0051540)	7	42	48	16.6667	87.5	3.78967	0.0026	0.160982	CG17376|CG4706|CG7349|Mst84Db|Mst84Dc|Mst84Dd|Mst87F
Mfuzz Cluster16	molecular_function	metalloexopeptidase activity(GO:0008235)	10	39	44	25.641	88.6364	6.35126	0	0.0260412	CG32454|CG8564|S-Lap1|S-Lap2|S-Lap3|S-Lap4|S-Lap5|S-Lap7|S-Lap8|loopin-1
Mfuzz Cluster16	molecular_function	microtubule binding(GO:0008017)	9	61	65	14.7541	93.8462	3.85106	0.0024	0.151783	CG3121|CG32392|Tektin-A|Tektin-C|chb|cnn|kat-60L1|kat80|spir
Mfuzz Cluster16	biological_process	microtubule-based movement(GO:0007018)	19	109	116	17.4312	93.9655	6.51165	0	0.0260412	CG10845|CG10859|CG1571|CG17150|CG32396|CG7794|CG9313|CG9492|Dhc16F|Dhc36C|Dhc62B|Dhc98D|Klp59C|Klp59D|Sdic1|alphaTub85E|betaTub85D|didum|robl37BC
Mfuzz Cluster16	cellular_component	microtubule(GO:0005874)	11	53	55	20.7547	96.3636	5.69426	0	0.0260412	CG17450|CG3085|CG32396|CG7794|Efhc1.1|Klp59C|Tektin-A|Tektin-C|alphaTub85E|betaTub85D|chb
Mfuzz Cluster16	cellular_component	mitochondrial envelope(GO:0005740)	10	48	56	20.8333	85.7143	5.44389	0	0.0260412	Ant2|CG1628|CG18418|CG2616|CG4995|CG7514|CG9582|Dic3|Tpc2|Ucp4C
Mfuzz Cluster16	cellular_component	mitochondrial inner membrane presequence translocase complex(GO:0005744)	3	11	13	27.2727	84.6154	3.62867	0.0166	0.609861	CG1724|Tim17a2|Tim17b2
Mfuzz Cluster16	cellular_component	mitochondrial inner membrane(GO:0005743)	8	56	63	14.2857	88.8889	3.51992	0.0054	0.281245	Ant2|CG1628|CG18418|CG30093|CG6914|CG7514|Tpc2|Ucp4C
Mfuzz Cluster16	cellular_component	mitochondrial matrix(GO:0005759)	7	53	57	13.2075	92.9825	3.04542	0.012	0.496486	CG14740|CG3483|CG7755|CG9920|Hsp60B|Hsp60C|Hsp60D
Mfuzz Cluster16	biological_process	mitochondrial transport(GO:0006839)	13	48	53	27.0833	90.566	7.5309	0	0.0260412	CG1628|CG1724|CG18418|CG5327|CG7514|Hsp60B|Hsp60C|Hsp60D|Porin2|Tim17a2|Tim17b2|Tom70|tomboy40
Mfuzz Cluster16	cellular_component	mitochondrion(GO:0005739)	19	254	269	7.48031	94.4238	2.28981	0.0336	0.950461	CG10361|CG10920|CG2137|CG2543|CG2616|CG31874|CG4095|CG42708|CG4706|CG6140|CG7311|CG8517|Dic3|Hsc70-2|Hsp60B|Hsp60C|Porin2|Trxr-2|tomboy40
Mfuzz Cluster16	UserSuppliedAssociations	MitoExplorer_all genes	79	1002	1065	7.88423	94.0845	3.85322	0	0.00124211	Ant2|CG10202|CG10361|CG10761|CG10920|CG12479|CG12511|CG1287|CG13564|CG14043|CG14508|CG14740|CG1494|CG15459|CG15530|CG1628|CG1638|CG1724|CG17349|CG1801|CG18418|CG2137|CG2543|CG2616|CG2854|CG30093|CG31007|CG31008|CG31773|CG31874|CG32026|CG3483|CG4095|CG42708|CG43343|CG4706|CG4836|CG4995|CG5432|CG5482|CG5718|CG5906|CG6140|CG6255|CG6485|CG6914|CG7024|CG7311|CG7349|CG7514|CG7616|CG8517|CG9101|CG9314|C…
Mfuzz Cluster16	UserSuppliedAssociations	MitoExplorer_Glycolysis	7	33	33	21.2121	100	4.0853	0.0004	0.00124211	CG10202|CG5432|CG9961|Hex-t1|Hex-t2|Pglym87|Pmm45A
Mfuzz Cluster16	UserSuppliedAssociations	MitoExplorer_Import_&_Sorting	12	67	74	17.9104	90.5405	4.62126	0	0.00124211	CG1724|CG31007|CG31008|CG9920|Hsp60B|Hsp60C|Hsp60D|Porin2|Tim17a2|Tim17b2|Tom70|tomboy40
Mfuzz Cluster16	UserSuppliedAssociations	MitoExplorer_Mitochondrial_Carrier	9	39	45	23.0769	86.6667	4.96331	0	0.00124211	CG1628|CG18418|CG2616|CG4995|CG7514|CG9582|Dic3|Tpc2|Ucp4C
Mfuzz Cluster16	UserSuppliedAssociations	MitoExplorer_Mitochondrial_Dynamics	10	42	43	23.8095	97.6744	5.3638	0	0.00124211	Ant2|CG10761|CG12479|CG12511|CG13564|CG14043|CG2854|CG9101|CG9855|Pgam5-2
Mfuzz Cluster16	UserSuppliedAssociations	MitoExplorer_ROS_Defense	4	25	31	16	80.6452	2.38988	0.0314	0.074104	CG8517|CG9314|DJ-1alpha|Trxr-2
Mfuzz Cluster16	UserSuppliedAssociations	MitoExplorer_TCA_Cycle	9	28	29	32.1429	96.5517	6.3469	0	0.00124211	CG14740|CG31874|CG32026|CG3483|CG4095|CG4706|CG6140|CG6255|fig
Mfuzz Cluster16	molecular_function	motor activity(GO:0003774)	14	76	86	18.4211	88.3721	5.84475	0	0.0260412	CG10845|CG10859|CG1571|CG17150|CG9313|CG9492|Dhc16F|Dhc36C|Dhc62B|Dhc98D|Klp59C|Klp59D|Sdic1|didum
Mfuzz Cluster16	molecular_function	NAD binding(GO:0051287)	6	37	40	16.2162	92.5	3.42407	0.0088	0.403706	CG32026|CG3483|CG43343|CG6485|CG7755|Sirt2
Mfuzz Cluster16	biological_process	nucleoside metabolic process(GO:0009116)	15	130	139	11.5385	93.5252	3.86717	0.0008	0.07456	Adgf-B|Adgf-E|CG11703|CG14006|CG14508|CG15547|CG16758|CG18128|CG31115|CG32396|CG7794|CG8349|Vha68-3|alphaTub85E|betaTub85D
Mfuzz Cluster16	molecular_function	oxidative phosphorylation uncoupler activity(GO:0017077)	3	4	5	75	80	6.7779	0.0004	0.0431902	CG9582|Tpc2|Ucp4C
Mfuzz Cluster16	molecular_function	oxidoreductase activity, acting on the CH-OH group of donors, quinone or similar compound as acceptor(GO:0016901)	4	7	7	57.1429	100	6.69524	0.0004	0.0431902	CG2137|CG43343|CG7311|Dhc36C
Mfuzz Cluster16	molecular_function	P-P-bond-hydrolysis-driven protein transmembrane transporter activity(GO:0015450)	5	22	24	22.7273	91.6667	4.10831	0.0022	0.142181	CG1724|Tim17a2|Tim17b2|Tom70|tomboy40
Mfuzz Cluster16	biological_process	peptidyl-proline modification(GO:0018208)	6	36	45	16.6667	80	3.5075	0.0048	0.257571	CG15767|CG30350|CG3492|CG5071|CG5482|CG9698
Mfuzz Cluster16	molecular_function	peptidyl-prolyl cis-trans isomerase activity(GO:0003755)	5	26	27	19.2308	96.2963	3.60876	0.0052	0.275693	CG15767|CG30350|CG3492|CG5071|CG5482
Mfuzz Cluster16	cellular_component	proteasome core complex(GO:0005839)	4	23	26	17.3913	88.4615	2.96902	0.0194	0.68707	Pros28.1B|Prosalpha6T|Prosbeta2R1|Prosbeta2R2
Mfuzz Cluster16	biological_process	protein localization to mitochondrion(GO:0070585)	9	30	32	30	93.75	6.71758	0	0.0260412	CG1724|CG5327|Hsp60B|Hsp60C|Hsp60D|Tim17a2|Tim17b2|Tom70|tomboy40
Mfuzz Cluster16	biological_process	protein polymerization(GO:0051258)	4	21	21	19.0476	100	3.20204	0.0182	0.6524	CG32396|CG7794|alphaTub85E|betaTub85D
Mfuzz Cluster16	biological_process	protein refolding(GO:0042026)	3	7	8	42.8571	87.5	4.8773	0.0028	0.1631	Hsp60B|Hsp60C|Hsp60D
Mfuzz Cluster16	cellular_component	protein serine/threonine phosphatase complex(GO:0008287)	5	37	37	13.5135	100	2.63215	0.0298	0.867925	CG32812|Pp1-13C|Ppm1|TbCMF46|Twdlalpha
Mfuzz Cluster16	molecular_function	protein tyrosine/serine/threonine phosphatase activity(GO:0008138)	4	20	21	20	95.2381	3.3297	0.0138	0.557923	CG10089|Sbf|cdc14|ssh
Mfuzz Cluster16	biological_process	protein ubiquitination(GO:0016567)	5	42	48	11.9048	87.5	2.30272	0.0448	1	CG9014|Cul-3|Cul-4|m-cup|sinah
Mfuzz Cluster16	biological_process	proteolysis involved in cellular protein catabolic process(GO:0051603)	10	109	115	9.17431	94.7826	2.344	0.0324	0.92241	CG31639|CG8494|Cul-3|Cul-4|Pros28.1B|Prosalpha6T|Prosbeta2R1|Prosbeta2R2|fzr2|sinah
Mfuzz Cluster16	biological_process	purine-containing compound salvage(GO:0043101)	3	10	10	30	100	3.8745	0.0108	0.459727	Adgf-B|Adgf-E|CG14006
Mfuzz Cluster16	molecular_function	pyruvate kinase activity(GO:0004743)	4	6	7	66.6667	85.7143	7.32028	0	0.0260412	CG11249|CG2964|CG7362|CG9624
Mfuzz Cluster16	cellular_component	sperm flagellum(GO:0036126)	3	3	3	100	100	7.95184	0	0.0260412	Mst87F|Mst98Ca|Mst98Cb
Mfuzz Cluster16	biological_process	sperm individualization(GO:0007291)	7	41	45	17.0732	91.1111	3.86951	0.0028	0.1631	Ark|Cul-3|Prosalpha6T|TTLL3B|didum|ntc|soti
Mfuzz Cluster16	biological_process	spermatid nucleus differentiation(GO:0007289)	3	5	6	60	83.3333	5.9652	0.0006	0.0596899	Mst35Ba|Mst35Bb|hyd
Mfuzz Cluster16	molecular_function	structural constituent of cytoskeleton(GO:0005200)	5	43	44	11.6279	97.7273	2.24261	0.0488	1	CG32396|CG7716|CG7794|alphaTub85E|betaTub85D
Mfuzz Cluster16	molecular_function	threonine-type peptidase activity(GO:0070003)	4	24	27	16.6667	88.8889	2.86213	0.022	0.740639	Pros28.1B|Prosalpha6T|Prosbeta2R1|Prosbeta2R2
Mfuzz Cluster16	cellular_component	tricarboxylic acid cycle enzyme complex(GO:0045239)	5	13	14	38.4615	92.8571	5.88612	0.0004	0.0431902	CG31874|CG32026|CG4095|CG6140|CG6255
Mfuzz Cluster16	biological_process	tricarboxylic acid cycle(GO:0006099)	9	38	41	23.6842	92.6829	5.6879	0.0004	0.0431902	CG14740|CG31874|CG32026|CG3483|CG4095|CG4706|CG5718|CG6140|CG7349
Mfuzz Cluster16	molecular_function	ubiquitin-protein transferase activity(GO:0004842)	11	79	88	13.9241	89.7727	4.03042	0.0006	0.0596899	CG10254|CG2574|CG42797|CG5823|CG9014|Cul-3|Cul-4|Ube3a|hyd|m-cup|sinah
Mfuzz Cluster17	molecular_function	calcium ion binding(GO:0005509)	13	198	213	6.56566	92.9577	2.66048	0.0416	1	Actn3|CG13526|CG13898|CG14861|CG31960|CG4704|CG5024|CG7466|CG9406|d-cup|sPLA2|sowi|sunz
Mfuzz Cluster17	cellular_component	ciliary part(GO:0044441)	3	17	20	17.6471	85	3.35212	0.0226	1	Cby|spag4|unc
Mfuzz Cluster17	biological_process	hydrogen ion transmembrane transport(GO:1902600)	9	54	56	16.6667	96.4286	5.57797	0.0002	0.590267	CG12027|CG15719|CG31477|Vha14-2|Vha16-3|Vha16-5|VhaAC39-2|VhaM9.7-d|VhaPPA1-2
Mfuzz Cluster17	molecular_function	hydrogen ion transmembrane transporter activity(GO:0015078)	14	100	104	14	96.1538	6.09639	0	0.590267	CG10396|CG12027|CG15719|CG18193|CG30354|CG31477|CG31644|CG43206|Vha14-2|Vha16-3|Vha16-5|VhaAC39-2|VhaM9.7-d|VhaPPA1-2
Mfuzz Cluster17	molecular_function	hydrogen-exporting ATPase activity(GO:0036442)	8	56	58	14.2857	96.5517	4.67295	0.0016	1	CG12027|CG15719|CG31477|Vha14-2|Vha16-3|Vha16-5|VhaAC39-2|VhaPPA1-2
Mfuzz Cluster17	UserSuppliedAssociations	IFM72vs30_log2FC<-2	133	1177	1177	11.2999	100	14.5926	0	0.00107273	Best3|CG10752|CG10801|CG10909|CG11269|CG12078|CG12438|CG12448|CG12535|CG12661|CG12674|CG12684|CG12923|CG13131|CG13202|CG13244|CG13463|CG13481|CG13526|CG13540|CG13829|CG13898|CG13970|CG14087|CG14151|CG1421|CG1428|CG14383|CG14456|CG14551|CG14731|CG14743|CG14931|CG14983|CG15233|CG15719|CG15734|CG15876|CG16904|CG17173|CG17195|CG17207|CG17580|CG17650|CG17744|CG18193|CG2053|CG30048|CG30065|CG30184|CG30…
Mfuzz Cluster17	cellular_component	male germ cell nucleus(GO:0001673)	3	11	11	27.2727	100	4.49758	0.0104	1	Taf12L|nht|sa
Mfuzz Cluster17	biological_process	meiotic nuclear division(GO:0007126)	8	69	75	11.5942	92	3.92485	0.0054	1	HP6|Taf12L|aly|mus304|sa|sunz|tomb|wuc
Mfuzz Cluster17	cellular_component	P granule(GO:0043186)	4	16	17	25	94.1176	4.91239	0.0022	1	krimp|qin|spn-E|vas
Mfuzz Cluster17	biological_process	protein palmitoylation(GO:0018345)	5	20	22	25	90.9091	5.49332	0.0008	0.787022	CG13029|CG17195|CG17196|CG4483|CG4956
Mfuzz Cluster17	molecular_function	protein-cysteine S-palmitoyltransferase activity(GO:0019706)	5	19	21	26.3158	90.4762	5.67782	0.0006	0.787022	CG13029|CG17195|CG17196|CG4483|CG4956
Mfuzz Cluster17	cellular_component	proton-transporting two-sector ATPase complex, catalytic domain(GO:0033178)	4	26	27	15.3846	96.2963	3.49578	0.0154	1	CG15719|CG31477|Vha14-2|Vha16-3
Mfuzz Cluster17	cellular_component	proton-transporting V-type ATPase, V0 domain(GO:0033179)	5	17	18	29.4118	94.4444	6.09086	0.0002	0.590267	Vha16-3|Vha16-5|VhaAC39-2|VhaM9.7-d|VhaPPA1-2
Mfuzz Cluster17	biological_process	spermatid development(GO:0007286)	5	37	40	13.5135	92.5	3.52927	0.0132	1	Vrp1|aly|sa|sns|spag4
Mfuzz Cluster17	biological_process	spermatogenesis(GO:0007283)	9	79	96	11.3924	82.2917	4.10017	0.0036	1	ACXB|Mst36Fb|RacGAP84C|Taf12L|aly|nht|sa|spag4|unc
Mfuzz Cluster17	biological_process	syncytium formation(GO:0006949)	4	29	29	13.7931	100	3.20832	0.0228	1	Vrp1|lbl|sing|sns
Mfuzz Cluster17	biological_process	telomere organization(GO:0032200)	3	16	17	18.75	94.1176	3.50095	0.024	1	HP6|ms(3)K81|mus304
Mfuzz Cluster17	UserSuppliedAssociations	WTvssalm_72hAPF_log2FC<-2	54	583	583	9.26244	100	7.25092	0	0.00107273	CG10752|CG10801|CG10834|CG10909|CG1138|CG12078|CG12464|CG12684|CG13526|CG13829|CG1421|CG14983|CG15403|CG15719|CG17195|CG17744|CG18193|CG30429|CG30447|CG31526|CG31601|CG31807|CG31816|CG32148|CG32232|CG32655|CG32720|CG34021|CG34029|CG34161|CG34170|CG42650|CG42659|CG42853|CG43069|CG43077|CG43110|CG43209|CG43638|CG4480|CG5755|CG8245|CG9592|CR32690|CR43845|FBgn0264980|FBgn0266962|FBgn0267253|Fer1|Mst3…
Mfuzz Cluster17	UserSuppliedAssociations	WTvssalm_99hAPF_log2FC<-2	71	842	842	8.4323	100	7.51277	0	0.00107273	CG10013|CG10801|CG12681|CG12684|CG13244|CG13337|CG13526|CG14269|CG15278|CG15472|CG15719|CG15734|CG16781|CG17173|CG18193|CG18558|CG2528|CG30401|CG30429|CG31013|CG31050|CG3117|CG31526|CG31709|CG31776|CG32263|CG32371|CG32847|CG33125|CG33136|CG33223|CG33235|CG34170|CG42288|CG42523|CG43206|CG43209|CG43277|CG43293|CG43329|CG4480|CG5194|CG5755|CG6405|CG7573|CG8072|CG9406|CG9592|CR33218|CR33319|CR43306|F…
Mfuzz Cluster18	molecular_function	aminoacyl-tRNA ligase activity(GO:0004812)	5	41	42	12.1951	97.619	4.39311	0.0008	0.1864	Aats-ala-m|Aats-ser|CG10092|CG5660|mRpL39
Mfuzz Cluster18	molecular_function	chitin binding(GO:0008061)	6	83	104	7.22892	79.8077	3.15621	0.0054	0.869302	Cda5|ChLD3|Cht6|Cht7|Gasp|Peritrophin-A
Mfuzz Cluster18	biological_process	chitin metabolic process(GO:0006030)	6	96	117	6.25	82.0513	2.73741	0.0132	1	Cda5|ChLD3|Cht6|Cht7|Gasp|Peritrophin-A
Mfuzz Cluster18	molecular_function	hydrolase activity, acting on carbon-nitrogen (but not peptide) bonds(GO:0016810)	6	82	91	7.31707	90.1099	3.19181	0.0026	0.479592	CG1764|CG31278|Cda5|ChLD3|RluA-1|pyd3
Mfuzz Cluster18	UserSuppliedAssociations	IFM72vs30h_log2FC>2	65	1537	1537	4.22902	100	5.66448	0	0.02124	Act79B|Ance-3|CG10211|CG10264|CG10581|CG11409|CG12935|CG13003|CG13038|CG13188|CG13618|CG14218|CG14397|CG1441|CG14626|CG14866|CG15249|CG17691|CG17777|CG18641|CG2975|CG30458|CG31871|CG32645|CG32694|CG32855|CG34115|CG43287|CG43386|CG4497|CG5177|CG5188|CG5873|CG8927|CG9297|CG9514|CG9542|CG9737|CG9782|CG9850|CR42860|Cda5|ChLD3|Cht6|Cht7|Cpr47Ef|Cpr51A|Cpr62Bc|Cpr76Bd|Cpr92F|Cpr97Eb|Gasp|Gld|Msr-110|Os…
Mfuzz Cluster18	molecular_function	isomerase activity(GO:0016853)	5	96	98	5.20833	97.9592	2.03594	0.037	1	CG11858|CG4598|CG5611|CG9363|RluA-1
Mfuzz Cluster18	cellular_component	mitochondrial large ribosomal subunit(GO:0005762)	15	47	47	31.9149	100	13.9738	0	0.0610621	mRpL11|mRpL15|mRpL17|mRpL19|mRpL21|mRpL22|mRpL3|mRpL30|mRpL33|mRpL35|mRpL36|mRpL37|mRpL39|mRpL4|mRpL43
Mfuzz Cluster18	cellular_component	mitochondrial matrix(GO:0005759)	4	53	57	7.54717	92.9825	2.6772	0.0178	1	CG3267|Lon|Roe1|mtTFB2
Mfuzz Cluster18	cellular_component	mitochondrial membrane(GO:0031966)	5	79	88	6.32911	89.7727	2.52939	0.0152	1	CG3803|CG4908|CG4942|Tom40|Tom7
Mfuzz Cluster18	cellular_component	mitochondrial small ribosomal subunit(GO:0005763)	8	30	30	26.6667	100	9.18549	0	0.0610621	mRpL3|mRpS18B|mRpS2|mRpS21|mRpS26|mRpS29|mRpS35|mRpS5
Mfuzz Cluster18	biological_process	mitochondrion organization(GO:0007005)	4	48	57	8.33333	84.2105	2.92059	0.0106	1	CG34132|Lon|mTerf3|mtTFB2
Mfuzz Cluster18	cellular_component	mitochondrion(GO:0005739)	17	254	269	6.69291	94.4238	4.9778	0	0.0610621	Aats-ala-m|CG10092|CG12413|CG4598|CG6412|CG7791|Cyp49a1|Hsc70-5|Lon|Prx3|Roe1|gatA|mRpL33|mRpL35|mRpL37|mtTFB2|ppl
Mfuzz Cluster18	UserSuppliedAssociations	MitoExplorer_all genes	81	1002	1065	8.08383	94.0845	13.1027	0	0.02124	140up|Aats-ala-m|Aats-ser|CG10092|CG11337|CG11679|CG11858|CG12413|CG12895|CG12935|CG13163|CG13390|CG13392|CG14100|CG15653|CG17141|CG1764|CG17691|CG18528|CG2124|CG2974|CG3267|CG34132|CG3803|CG4042|CG4598|CG4610|CG4611|CG4679|CG4743|CG4749|CG4908|CG4942|CG5611|CG5660|CG5991|CG6000|CG6412|CG6878|CG7791|CG8080|CG8531|CG9363|Cyp49a1|FBgn0266268|Hsc70-5|Lon|Mfe2|Prx3|RluA-1|Roe1|Tom40|Tom7|bsf|gatA|mRp…
Mfuzz Cluster18	UserSuppliedAssociations	MitoExplorer_Amino_Acid_Metabolism	5	58	63	8.62069	92.0635	3.26825	0.006	0.0321818	CG17691|CG3267|CG8080|CG9363|ppl
Mfuzz Cluster18	UserSuppliedAssociations	MitoExplorer_Import_&_Sorting	7	67	74	10.4478	90.5405	4.52392	0	0.02124	140up|CG34132|CG7791|Hsc70-5|Roe1|Tom40|Tom7
Mfuzz Cluster18	UserSuppliedAssociations	MitoExplorer_Translation	46	180	189	25.5556	95.2381	21.2243	0	0.02124	Aats-ala-m|Aats-ser|CG10092|CG11337|CG11679|CG11858|CG12413|CG13163|CG13390|CG14100|CG17141|CG18528|CG2124|CG4610|CG4611|CG4679|CG4749|CG5660|CG6412|RluA-1|bsf|gatA|mRpL11|mRpL15|mRpL17|mRpL19|mRpL21|mRpL22|mRpL3|mRpL30|mRpL33|mRpL35|mRpL36|mRpL37|mRpL39|mRpL4|mRpL43|mRpS18B|mRpS2|mRpS21|mRpS23|mRpS26|mRpS29|mRpS35|mRpS5|mTerf3
Mfuzz Cluster18	biological_process	ncRNA metabolic process(GO:0034660)	10	125	131	8	95.4198	4.47495	0.0002	0.0610621	Aats-ala-m|Aats-ser|CG10092|CG18528|CG4610|CG5660|CG7009|drosha|mRpL39|mtTFB2
Mfuzz Cluster18	biological_process	organic cyclic compound catabolic process(GO:1901361)	6	119	125	5.04202	95.2	2.14455	0.0244	1	CG11337|CG17224|CG18528|CG9363|drosha|pyd3
Mfuzz Cluster18	molecular_function	peroxidase activity(GO:0004601)	3	23	25	13.0435	92	3.56599	0.0102	1	CG10211|CG5873|Prx3
Mfuzz Cluster18	biological_process	protein targeting to mitochondrion(GO:0006626)	4	27	29	14.8148	93.1034	4.49483	0.0024	0.452119	CG34132|Roe1|Tom40|Tom7
Mfuzz Cluster18	cellular_component	ribosome(GO:0005840)	15	139	140	10.7914	99.2857	6.98908	0	0.0610621	mRpL11|mRpL17|mRpL19|mRpL21|mRpL22|mRpL3|mRpL35|mRpL36|mRpL37|mRpL4|mRpS18B|mRpS2|mRpS21|mRpS23|mRpS5
Mfuzz Cluster18	molecular_function	RNA methyltransferase activity(GO:0008173)	3	21	24	14.2857	87.5	3.79686	0.008	1	CG14100|CG7009|mtTFB2
Mfuzz Cluster18	biological_process	RNA modification(GO:0009451)	5	40	43	12.5	93.0233	4.47114	0.0004	0.114245	CG18528|CG4610|CG7009|RluA-1|mtTFB2
Mfuzz Cluster18	molecular_function	structural constituent of cuticle(GO:0042302)	10	112	145	8.92857	77.2414	4.90903	0	0.0610621	CG8927|Cpr47Ef|Cpr51A|Cpr56F|Cpr62Bc|Cpr67Fa2|Cpr76Bd|Cpr92F|Cpr97Eb|zye
Mfuzz Cluster18	molecular_function	structural constituent of ribosome(GO:0003735)	23	176	178	13.0682	98.8764	9.96376	0	0.0610621	mRpL11|mRpL15|mRpL17|mRpL19|mRpL21|mRpL22|mRpL3|mRpL30|mRpL33|mRpL35|mRpL36|mRpL37|mRpL39|mRpL4|mRpL43|mRpS18B|mRpS2|mRpS21|mRpS23|mRpS26|mRpS29|mRpS35|mRpS5
Mfuzz Cluster18	biological_process	translation(GO:0006412)	25	189	193	13.2275	97.9275	10.4833	0	0.0610621	CG12413|mRpL11|mRpL15|mRpL17|mRpL19|mRpL21|mRpL22|mRpL3|mRpL30|mRpL33|mRpL35|mRpL36|mRpL37|mRpL39|mRpL4|mRpL43|mRpS18B|mRpS2|mRpS21|mRpS23|mRpS26|mRpS29|mRpS35|mRpS5|mTerf3
Mfuzz Cluster18	molecular_function	unfolded protein binding(GO:0051082)	5	86	88	5.81395	97.7273	2.31182	0.024	1	CG6000|CG7048|CG8531|Hsc70-5|Roe1
Mfuzz Cluster18	UserSuppliedAssociations	WTvssalm_30hAPF_log2FC>2	33	398	398	8.29146	100	8.26681	0	0.02124	Aats-ser|CAP|CG11337|CG11679|CG12413|CG13390|CG13458|CG14100|CG31673|CG3803|CG4042|CG4611|CG4619|CG4679|CG4749|CG4908|CG9471|CG9642|FBgn0265862|Prx3|bsf|mRpL15|mRpL19|mRpL21|mRpL3|mRpL36|mRpL37|mRpL4|mRpL43|mRpS2|mRpS26|mRpS35|sni
Mfuzz Cluster19	molecular_function	actin binding(GO:0003779)	7	111	119	6.30631	93.2773	2.39397	0.0082	0.340858	CG6891|Hsp23|capt|flr|klar|p16-ARC|tsr
Mfuzz Cluster19	biological_process	actin polymerization or depolymerization(GO:0008154)	3	11	11	27.2727	100	5.06866	0.001	0.0527024	capt|flr|tsr
Mfuzz Cluster19	molecular_function	aminoacyl-tRNA ligase activity(GO:0004812)	8	41	42	19.5122	97.619	6.7095	0	0.0126486	Aats-ala|Aats-asn|Aats-cys|Aats-his|Aats-lys|Aats-val|CG17259|CG5706
Mfuzz Cluster19	cellular_component	catalytic step 2 spliceosome(GO:0071013)	14	118	123	11.8644	95.935	6.23931	0	0.0126486	CG10754|CG13900|CG2063|CG2685|CG4980|CG7028|Cypl|LSm7|Tango4|Zn72D|c12.1|lost|noi|snRNP-U1-70K
Mfuzz Cluster19	biological_process	cell morphogenesis(GO:0000902)	6	102	104	5.88235	98.0769	2.02667	0.0212	0.647574	Abi|Sra-1|capt|msn|p16-ARC|tsr
Mfuzz Cluster19	cellular_component	chaperonin-containing T-complex(GO:0005832)	7	8	8	87.5	100	14.9003	0	0.0126486	CG5525|CG7033|CG8258|Cct5|Cctgamma|Tcp-1eta|Tcp-1zeta
Mfuzz Cluster19	biological_process	cortical cytoskeleton organization(GO:0030865)	3	18	18	16.6667	100	3.69044	0.005	0.223586	Abi|Elp3|Sra-1
Mfuzz Cluster19	cellular_component	cytoplasm(GO:0005737)	40	727	776	5.50206	93.6856	4.92944	0	0.0126486	Aats-ala|Aats-asn|Aats-cys|Aats-his|Aats-lys|Aats-val|Abi|Art3|CG10082|CG17259|CG5706|Cctgamma|Cdc37|Csl4|Dcp1|Elp1|Elp3|FK506-bp2|ImpL3|Rpt3|Rrp4|Rrp40|Rrp42|Rrp46|Smn|Snoo|Sra-1|Upf1|Zfrp8|capt|corn|dlt|ird5|klar|lost|mod|msk|pcm|rols|vig2
Mfuzz Cluster19	biological_process	cytoplasmic microtubule organization(GO:0031122)	5	16	16	31.25	100	7.10289	0	0.0126486	CG5525|CG7033|CG8258|Tcp-1eta|Tcp-1zeta
Mfuzz Cluster19	molecular_function	DNA-directed RNA polymerase activity(GO:0003899)	9	30	33	30	90.9091	9.30724	0	0.0126486	CG13773|CG18600|CG5147|CG5380|RpI1|RpI135|RpIII128|Rpb5|Rpb8
Mfuzz Cluster19	biological_process	DNA-templated transcription, initiation(GO:0006352)	5	73	73	6.84932	100	2.22673	0.0166	0.599904	Brf|MED7|MED8|Spt3|Taf11
Mfuzz Cluster19	cellular_component	exosome (RNase complex)(GO:0000178)	6	13	13	46.1538	100	9.73928	0	0.0126486	Csl4|Dis3|Rrp4|Rrp40|Rrp42|Rrp46
Mfuzz Cluster19	UserSuppliedAssociations	IFM72vs30_log2FC<-2	119	1177	1177	10.1105	100	18.4112	0	0.000983333	Aats-ala|Aats-val|Arp8|Art3|Brf|CG10082|CG10286|CG10576|CG11417|CG11837|CG12134|CG12301|CG12499|CG13185|CG13333|CG1354|CG13575|CG1360|CG13900|CG14230|CG14544|CG1542|CG15517|CG1671|CG17259|CG1785|CG1806|CG18178|CG30349|CG32409|CG3335|CG3368|CG3808|CG3817|CG4038|CG42268|CG43658|CG4554|CG4593|CG5114|CG5290|CG5525|CG5589|CG6227|CG6712|CG6891|CG7006|CG7033|CG7246|CG7519|CG7845|CG7993|CG8258|CG8545|CG8…
Mfuzz Cluster19	biological_process	mitotic spindle organization(GO:0007052)	13	190	194	6.84211	97.9381	3.60757	0.0002	0.0126486	CG10754|CG13900|CG5525|CG7033|CG8258|Cct5|Cctgamma|Tcp-1eta|Tcp-1zeta|c12.1|eco|noi|snRNP-U1-70K
Mfuzz Cluster19	biological_process	mRNA metabolic process(GO:0016071)	30	260	268	11.5385	97.0149	8.99837	0	0.0126486	CG10754|CG13900|CG15440|CG2063|CG2685|CG4980|CG6227|CG6379|CG7028|Csl4|Cypl|Dcp1|Dis3|LSm7|Prp31|Rbp1-like|RnpS1|Rrp4|Rrp42|Rrp46|Smn|Tango4|Upf1|Zn72D|c12.1|hoip|lost|noi|pcm|snRNP-U1-70K
Mfuzz Cluster19	molecular_function	N-methyltransferase activity(GO:0008170)	4	30	33	13.3333	90.9091	3.63221	0.0034	0.15761	Art3|CG11837|CG6388|gpp
Mfuzz Cluster19	biological_process	neurogenesis(GO:0022008)	65	544	563	11.9485	96.6252	13.821	0	0.0126486	Aats-val|Apc10|CG10754|CG11417|CG11583|CG11837|CG12259|CG12301|CG12499|CG13333|CG13900|CG14230|CG15445|CG1671|CG1785|CG18273|CG2063|CG2656|CG32075|CG3224|CG32708|CG3527|CG3817|CG4038|CG4554|CG4593|CG5290|CG5380|CG5525|CG5543|CG5800|CG6724|CG6937|CG7028|CG7033|CG7246|CG7275|CG7728|CG7993|CG8064|CG9246|CG9305|Cct5|Cdc37|Dis3|Fen1|JhI-1|LSm7|Mat89Ba|Mys45A|Nopp140|Prp31|Rbm13|RpI135|Rrp42|Sas10|Surf…
Mfuzz Cluster19	biological_process	neuromuscular junction development(GO:0007528)	5	58	61	8.62069	95.082	2.82316	0.0094	0.373218	Abi|Elp3|G-salpha60A|Smn|rictor
Mfuzz Cluster19	cellular_component	nuclear lamina(GO:0005652)	4	10	11	40	90.9091	7.33206	0	0.0126486	Dis3|LamC|Rrp4|Rrp42
Mfuzz Cluster19	biological_process	nuclear migration(GO:0007097)	3	22	23	13.6364	95.6522	3.19751	0.0108	0.426889	BicD|klar|msn
Mfuzz Cluster19	cellular_component	nuclear transcription factor complex(GO:0044798)	5	57	59	8.77193	96.6102	2.86965	0.0068	0.296587	Brf|Pbp45|Spt3|Taf11|tai
Mfuzz Cluster19	cellular_component	nucleolar part(GO:0044452)	5	10	10	50	100	9.29598	0	0.0126486	CG4038|CG6724|Fib|RpI1|RpI135
Mfuzz Cluster19	cellular_component	nucleolus(GO:0005730)	19	59	64	32.2034	92.1875	14.125	0	0.0126486	CG11583|CG1542|CG3527|CG6712|CG8545|CG8939|Fib|Mys45A|NHP2|Nopp140|Rtc1|Surf6|dbe|hoip|l(1)1Bi|l(3)07882|mod|nop5|wcd
Mfuzz Cluster19	molecular_function	nucleoside phosphate binding(GO:1901265)	62	1229	1299	5.04475	94.6112	5.5278	0	0.0126486	Aats-ala|Aats-asn|Aats-cys|Aats-his|Aats-lys|Aats-val|Arf72A|CG10463|CG11417|CG13185|CG1354|CG14230|CG15440|CG17259|CG18178|CG2656|CG32708|CG33158|CG3335|CG34424|CG3645|CG3808|CG42569|CG5525|CG5589|CG5706|CG5800|CG6227|CG6937|CG7028|CG7033|CG8258|CG8611|CG9107|CG9143|Cct5|Cctgamma|Dbp45A|Eap|Eip63E|G-salpha60A|ImpL3|La|Pkn|RabX6|Rala|Rbp1-like|RnpS1|Rpt3|Rs1|Saf-B|Snoo|Tcp-1eta|Tcp-1zeta|Upf1|bet…
Mfuzz Cluster19	biological_process	nucleus organization(GO:0006997)	3	23	25	13.0435	92	3.09284	0.0126	0.485045	LamC|Nopp140|kuk
Mfuzz Cluster19	cellular_component	nucleus(GO:0005634)	57	1254	1407	4.54545	89.1258	4.41797	0	0.0126486	Brf|CG10754|CG11417|CG12259|CG13097|CG13900|CG18600|CG32409|CG42569|CG5380|CG6227|CG6506|CG7006|CG7728|CG8939|CG9300|CG9305|Dbp45A|Dis3|Elp3|Fen1|Hr39|Ing3|JhI-1|La|MED7|Nf-YA|RpI1|RpI135|RpIII128|Rpb5|Rpt3|Rrp42|Rtc1|Saf-B|Samuel|Sas10|Smn|Snoo|Spt3|Taf11|XRCC1|Zfrp8|gpp|hoip|l(1)G0020|l(2)34Fd|luna|mod|msk|nclb|noi|snRNP-U1-70K|stc|tai|vig2|wcd
Mfuzz Cluster19	biological_process	peptidyl-lysine modification(GO:0018205)	4	46	47	8.69565	97.8723	2.54431	0.0176	0.630892	Elp3|gpp|nero|vig2
Mfuzz Cluster19	cellular_component	perinuclear region of cytoplasm(GO:0048471)	3	31	34	9.67742	91.1765	2.42694	0.0236	0.650386	Abi|klar|msk
Mfuzz Cluster19	molecular_function	poly(A) RNA binding(GO:0044822)	17	182	189	9.34066	96.2963	5.64104	0	0.0126486	CG14230|CG3335|CG3808|CG5589|CG6227|CG6937|CG9143|Eap|Fib|La|RnpS1|Saf-B|U3-55K|Zn72D|hoip|mod|snRNP-U1-70K
Mfuzz Cluster19	biological_process	posttranscriptional gene silencing(GO:0016441)	3	29	30	10.3448	96.6667	2.57054	0.027	0.699	Dcp1|Elp1|pcm
Mfuzz Cluster19	cellular_component	precatalytic spliceosome(GO:0071011)	17	143	148	11.8881	96.6216	6.89497	0	0.0126486	CG10754|CG13900|CG2063|CG2685|CG4980|CG7028|Cypl|LSm7|Prp31|Rbp1-like|Tango4|Zn72D|c12.1|hoip|lost|noi|snRNP-U1-70K
Mfuzz Cluster19	biological_process	protein alkylation(GO:0008213)	3	37	39	8.10811	94.8718	2.05859	0.0464	0.920974	Art3|gpp|vig2
Mfuzz Cluster19	biological_process	protein folding(GO:0006457)	9	123	127	7.31707	96.8504	3.22175	0.0012	0.0607131	CG5525|CG7033|CG8258|Cct5|Cctgamma|Cypl|FK506-bp2|Tcp-1eta|Tcp-1zeta
Mfuzz Cluster19	biological_process	pseudouridine synthesis(GO:0001522)	3	11	12	27.2727	91.6667	5.06866	0.0006	0.0342735	CG4038|CG6745|NHP2
Mfuzz Cluster19	biological_process	pteridine-containing compound metabolic process(GO:0042558)	3	16	16	18.75	100	3.99673	0.0044	0.200812	CG34424|DhpD|lost
Mfuzz Cluster19	molecular_function	purine nucleoside binding(GO:0001883)	40	814	862	4.914	94.4316	4.15404	0	0.0126486	Aats-ala|Aats-asn|Aats-cys|Aats-his|Aats-lys|Aats-val|Arf72A|CG13185|CG1354|CG17259|CG33158|CG34424|CG5525|CG5589|CG5706|CG5800|CG6227|CG7028|CG7033|CG8258|CG8611|CG9143|Cct5|Cctgamma|Dbp45A|Eip63E|G-salpha60A|Pkn|RabX6|Rala|Rpt3|Rs1|Tcp-1eta|Tcp-1zeta|Upf1|betaTub56D|ird5|lost|msn|sick
Mfuzz Cluster19	biological_process	regulation of alternative mRNA splicing, via spliceosome(GO:0000381)	4	52	58	7.69231	89.6552	2.25569	0.0256	0.672589	CG6227|Dbp45A|Saf-B|snRNP-U1-70K
Mfuzz Cluster19	biological_process	regulation of embryonic cell shape(GO:0016476)	3	29	30	10.3448	96.6667	2.57054	0.0238	0.650386	mey|msn|neo
Mfuzz Cluster19	biological_process	regulation of gene silencing(GO:0060968)	3	37	38	8.10811	97.3684	2.05859	0.0488	0.954095	Hr39|Samuel|vig2
Mfuzz Cluster19	biological_process	regulation of vesicle-mediated transport(GO:0060627)	3	32	34	9.375	94.1176	2.35954	0.024	0.651828	Arf72A|BicD|corn
Mfuzz Cluster19	biological_process	rhabdomere development(GO:0042052)	3	24	26	12.5	92.3077	2.99405	0.0182	0.645821	msk|p47|tsr
Mfuzz Cluster19	biological_process	ribonucleoprotein complex assembly(GO:0022618)	4	39	41	10.2564	95.122	2.94813	0.0076	0.32043	CG7006|Rbp1-like|Smn|eIF6
Mfuzz Cluster19	biological_process	ribonucleoprotein complex biogenesis(GO:0022613)	12	25	25	48	100	14.0878	0	0.0126486	CG11583|CG32409|CG3527|CG4038|CG7728|Mys45A|RpLP0-like|Rs1|Rtc1|Surf6|hoip|l(3)07882
Mfuzz Cluster19	molecular_function	ribonucleoside binding(GO:0032549)	42	818	866	5.13447	94.4573	4.57365	0	0.0126486	Aats-ala|Aats-asn|Aats-cys|Aats-his|Aats-lys|Aats-val|Arf72A|CG13185|CG1354|CG17259|CG33158|CG34424|CG5525|CG5589|CG5706|CG5800|CG6227|CG7028|CG7033|CG8258|CG8611|CG9143|Cct5|Cctgamma|Dbp45A|Eip63E|G-salpha60A|Pkn|RabX6|Rala|RpI135|RpIII128|Rpt3|Rs1|Tcp-1eta|Tcp-1zeta|Upf1|betaTub56D|ird5|lost|msn|sick
Mfuzz Cluster19	molecular_function	RNA helicase activity(GO:0003724)	7	47	49	14.8936	95.9184	5.21575	0	0.0126486	CG5589|CG5800|CG6227|CG8611|CG9143|Dbp45A|Rs1
Mfuzz Cluster19	biological_process	RNA methylation(GO:0001510)	3	12	13	25	92.3077	4.80531	0.0028	0.132573	CG14544|CG6379|CG8939
Mfuzz Cluster19	molecular_function	RNA methyltransferase activity(GO:0008173)	8	21	24	38.0952	87.5	10.0886	0	0.0126486	CG11837|CG14544|CG3527|CG3808|CG6379|CG6388|CG8939|Nsun2
Mfuzz Cluster19	biological_process	RNA processing(GO:0006396)	33	284	294	11.6197	96.5986	9.50238	0	0.0126486	CG10754|CG13900|CG15440|CG2063|CG2685|CG3808|CG42569|CG4980|CG6227|CG7028|CG7246|Csl4|Cypl|Dis3|Fib|JhI-1|LSm7|La|Prp31|Rbp1-like|Rrp4|Rrp42|Rrp46|Rtc1|Smn|Tango4|Zn72D|c12.1|hoip|l(1)G0045|lost|noi|snRNP-U1-70K
Mfuzz Cluster19	UserSuppliedAssociations	RNA_binding_proteins	59	550	884	10.7273	62.2172	13.1139	0	0.000983333	Aats-cys|BicD|CG10754|CG11123|CG11583|CG12259|CG14230|CG1542|CG15440|CG18178|CG2685|CG31550|CG32708|CG33158|CG3335|CG3808|CG4038|CG42569|CG5589|CG5706|CG6227|CG6388|CG6712|CG6745|CG6937|CG7006|CG8545|CG9107|CG9143|Csl4|Eap|Fib|LSm7|La|Mat89Ba|NHP2|Nsun2|Prp31|Rbp1-like|RnpS1|Rrp4|Rrp40|Saf-B|Smn|U3-55K|Upf1|Zn72D|c12.1|dbe|eIF-3p66|eIF6|hoip|l(3)07882|lost|mod|msk|noi|pen|snRNP-U1-70K
Mfuzz Cluster19	molecular_function	RNA-dependent ATPase activity(GO:0008186)	6	39	41	15.3846	95.122	4.93996	0	0.0126486	CG5589|CG6227|CG8611|CG9143|Dbp45A|Rs1
Mfuzz Cluster19	UserSuppliedAssociations	RNAi phenotype in muscle (Schnorrer et al 2010)	118	2028	2121	5.81854	95.6153	11.2891	0	0.000983333	Aats-ala|Aats-asn|Aats-cys|Aats-val|Brf|CG10463|CG10754|CG11417|CG11583|CG11837|CG12050|CG12082|CG12259|CG12499|CG13185|CG13333|CG13773|CG13900|CG14230|CG1542|CG1671|CG18273|CG18600|CG2063|CG2656|CG2685|CG30349|CG32075|CG3224|CG32479|CG32537|CG32708|CG3527|CG3817|CG4038|CG4554|CG4980|CG5147|CG5290|CG5339|CG5380|CG5525|CG5543|CG5589|CG5706|CG5800|CG6227|CG6724|CG6937|CG7006|CG7028|CG7033|CG7246|CG…
Mfuzz Cluster19	molecular_function	rRNA binding(GO:0019843)	3	11	11	27.2727	100	5.06866	0.001	0.0527024	CG4038|La|NHP2
Mfuzz Cluster19	biological_process	rRNA processing(GO:0006364)	18	33	35	54.5455	94.2857	18.53	0	0.0126486	CG11837|CG12301|CG13097|CG1542|CG1671|CG3527|CG4038|CG6724|CG8545|CG8939|CG9799|Fib|NHP2|Rrp40|U3-55K|dbe|nop5|wcd
Mfuzz Cluster19	molecular_function	S-adenosylmethionine-dependent methyltransferase activity(GO:0008757)	10	55	60	18.1818	91.6667	7.16239	0	0.0126486	Art3|CG11837|CG14544|CG3527|CG6379|CG6388|CG8545|CG8939|Nsun2|gpp
Mfuzz Cluster19	cellular_component	small nuclear ribonucleoprotein complex(GO:0030532)	10	64	66	15.625	96.9697	6.45595	0	0.0126486	CG10754|CG13900|CG4038|Fib|LSm7|U3-55K|hoip|noi|snRNP-U1-70K|wcd
Mfuzz Cluster19	cellular_component	small nucleolar ribonucleoprotein complex(GO:0005732)	3	5	5	60	100	7.95995	0	0.0126486	CG4038|Fib|NHP2
Mfuzz Cluster19	cellular_component	small-subunit processome(GO:0032040)	3	4	4	75	100	8.98182	0	0.0126486	CG12301|CG1671|CG9799
Mfuzz Cluster19	molecular_function	snoRNA binding(GO:0030515)	4	6	6	66.6667	100	9.73409	0	0.0126486	CG4038|NHP2|U3-55K|l(3)07882
Mfuzz Cluster19	molecular_function	structure-specific DNA binding(GO:0043566)	3	33	34	9.09091	97.0588	2.29477	0.0296	0.746662	Pbp45|nclb|stc
Mfuzz Cluster19	biological_process	synaptic vesicle endocytosis(GO:0048488)	3	28	31	10.7143	90.3226	2.64723	0.0208	0.647574	Arf72A|BicD|Eps-15
Mfuzz Cluster19	biological_process	transcription from RNA polymerase II promoter(GO:0006366)	6	55	58	10.9091	94.8276	3.80514	0.0006	0.0342735	MED7|MED8|Pbp45|Rpb5|Rpb8|Spt3
Mfuzz Cluster19	biological_process	transcription from RNA polymerase III promoter(GO:0006383)	5	12	13	41.6667	92.3077	8.39127	0	0.0126486	Brf|CG5147|CG5380|Pbp45|RpIII128
Mfuzz Cluster19	biological_process	tRNA metabolic process(GO:0006399)	16	74	78	21.6216	94.8718	10.1595	0	0.0126486	Aats-ala|Aats-asn|Aats-cys|Aats-his|Aats-lys|Aats-val|CG10463|CG14544|CG17259|CG3645|CG5706|CG6388|Fib|JhI-1|Tgt|l(1)G0045
Mfuzz Cluster19	molecular_function	unfolded protein binding(GO:0051082)	8	86	88	9.30233	97.7273	3.83666	0.0002	0.0126486	CG5525|CG7033|CG8258|Cct5|Cctgamma|Cdc37|Tcp-1eta|Tcp-1zeta
Mfuzz Cluster19	UserSuppliedAssociations	WTvssalm_30hAPF_log2FC>2	18	398	398	4.52261	100	2.81352	0.0018	0.00708	CG11357|CG11417|CG1542|CG4038|CG6543|CG9143|Fen1|Fib|Hsp26|ImpL3|NHP2|RpLP0-like|Rrp4|hoip|l(1)G0020|l(3)72Dn|nclb|nop5
Mfuzz Cluster2	UserSuppliedAssociations	IFM72vs30_log2FC<-2	46	1177	1177	3.90824	100	7.25532	0	0.02124	AP-2|Adgf-A|CG13137|CG13474|CG14958|CG15056|CG15071|CG17018|CG18545|CG18649|CG31668|CG3251|CG3347|CG33552|CG42658|CG43098|CG43230|CG5592|CR41443|CR42836|CR43159|CR43264|CR43431|CR43475|CR43625|FBgn0265039|FBgn0265063|FBgn0265382|FBgn0265958|FBgn0266004|FBgn0266595|FBgn0266957|FBgn0266978|FBgn0267123|FBgn0267159|FBgn0267537|FBgn0267604|Osi5|Vha16-4|bnb|comr|fd102C|fd96Ca|piwi|psd|sug
Mfuzz Cluster2	molecular_function	nucleic acid binding transcription factor activity(GO:0001071)	14	422	443	3.31754	95.2596	3.86213	0.0442	1	AP-2|CG2678|CG32006|Dbx|Dfd|OdsH|Six4|abd-A|byn|can|fd102C|fd96Ca|slou|tj
Mfuzz Cluster2	biological_process	reproductive structure development(GO:0048608)	4	56	58	7.14286	96.5517	3.95133	0.024	1	AP-2|Six4|abd-A|tj
Mfuzz Cluster2	molecular_function	sequence-specific DNA binding(GO:0043565)	11	283	296	3.88693	95.6081	4.01016	0.0258	1	AP-2|CG32006|Dbx|Dfd|OdsH|Six4|abd-A|fd102C|fd96Ca|slou|tj
Mfuzz Cluster2	UserSuppliedAssociations	WTvssalm_72hAPF_log2FC<-2	34	583	583	5.8319	100	8.87758	0	0.02124	Acp36DE|CG12950|CG14072|CG17018|CG18545|CG18649|CG32603|CG33260|CG3347|CG3618|CG3822|CG43098|CG5281|CR41443|CR42545|CR42836|CR42875|CR43264|CR43431|CR43475|CR43975|Dh44|FBgn0265039|FBgn0265458|FBgn0265546|FBgn0265801|FBgn0265964|FBgn0266595|FBgn0266957|FBgn0266978|FBgn0267123|FBgn0267604|Lip2|fd102C
Mfuzz Cluster2	UserSuppliedAssociations	WTvssalm_99hAPF_log2FC<-2	35	842	842	4.15677	100	6.63913	0	0.02124	Atg12|BoYb|CG13137|CG15394|CG15730|CG17681|CG18649|CG30002|CG31286|CG31482|CG33260|CG7213|CG8550|CR41440|CR41443|CR43640|CR43656|CR43830|CR43844|CR43975|Dh44|FBgn0265145|FBgn0265958|FBgn0265997|FBgn0266069|FBgn0266972|Grip75|Lip2|Takr86C|Vm26Aa|coil|piwi|psd|skpE|tj
Mfuzz Cluster20	biological_process	adult behavior(GO:0030534)	12	107	109	11.215	98.1651	3.69377	0.0028	0.0854869	Poxn|RhoGAP18B|Sk2|TBPH|ben|dpn|fliI|ovo|rho|scb|tay|tutl
Mfuzz Cluster20	biological_process	anatomical structure morphogenesis(GO:0009653)	100	814	866	12.285	93.9954	12.1729	0	0.0105405	CG13427|CG14478|CG42684|CG43736|CG6398|Cka|CrebA|Dad|Dok|E(spl)|Ets21C|HLHm7|ImpE3|Jra|Liprin-alpha|MED11|MEP-1|Mnn1|Oaz|Orct2|Pi3K92E|Poxn|Pvf2|Rac2|Rbsn-5|RhoGEF2|Sb|Ser|Shroom|Sip1|Socs36E|Tom|TwdlM|ab|al|aos|app|ato|ben|bi|blot|boi|bowl|br|brk|brn|bun|cindr|ckn|cno|comm|crb|cv-2|da|dgo|dib|dlp|dpn|dpp|ec|emc|en|ex|fj|fliI|grh|hh|in|inx2|jbug|kni|ksr|lbk|lft|lz|mib1|mirr|ovo|phl|pot|puc|pwn|px…
Mfuzz Cluster20	cellular_component	apical cortex(GO:0045179)	4	24	25	16.6667	96	3.08435	0.019	0.350471	RhoGEF2|app|insc|mib1
Mfuzz Cluster20	cellular_component	apical part of cell(GO:0045177)	5	22	22	22.7273	100	4.38128	0.0016	0.0555545	RhoGEF2|Sip1|boca|insc|pot
Mfuzz Cluster20	cellular_component	apical plasma membrane(GO:0016324)	8	37	37	21.6216	100	5.34792	0.0002	0.0105405	Ptp4E|RhoGEF2|Ser|crb|ex|inx2|mgl|sqh
Mfuzz Cluster20	cellular_component	cell cortex(GO:0005938)	7	57	58	12.2807	98.2759	3.09423	0.015	0.301156	Axs|Dok|Tre1|cno|insc|numb|sqh
Mfuzz Cluster20	cellular_component	cell division site part(GO:0032155)	3	12	13	25	92.3077	3.62961	0.0134	0.277854	RhoGEF2|cindr|sqh
Mfuzz Cluster20	biological_process	cell migration(GO:0016477)	21	188	201	11.1702	93.5323	4.8853	0	0.0105405	Dad|Pvf2|Rac2|Shroom|Tre1|ab|brn|bun|cindr|dpp|hh|kni|knrl|numb|pgc|phl|puc|scb|sqh|th|tin
Mfuzz Cluster20	biological_process	cell projection organization(GO:0030030)	27	255	265	10.5882	96.2264	5.23659	0	0.0105405	BBS8|CG1399|E(spl)|Ets21C|HLHm7|MED11|MEP-1|Pi3K92E|Rac2|ab|ato|ben|ckn|comm|dpn|en|hh|in|kni|ovo|rho|sna|sqh|sqz|vvl|wg|wor
Mfuzz Cluster20	biological_process	cell proliferation(GO:0008283)	12	129	134	9.30233	96.2687	2.96272	0.0126	0.264361	Cdk4|Pvf2|elB|emc|inx2|nab|noc|numb|rho|shn|wah|wg
Mfuzz Cluster20	cellular_component	cell-cell junction(GO:0005911)	10	57	61	17.5439	93.4426	5.0946	0	0.0105405	CG6398|Gli|Shroom|cno|crb|ex|inx2|ogre|pck|sqh
Mfuzz Cluster20	biological_process	cell-cell signaling involved in cell fate commitment(GO:0045168)	19	194	208	9.79381	93.2692	3.99233	0.001	0.0408018	CG16908|CG6453|CG6509|CG7714|Gnf1|Rac2|Ser|aos|bowl|cindr|emc|hh|itp|mib1|pwn|sca|tara|tutl|wor
Mfuzz Cluster20	biological_process	cellular response to alcohol(GO:0097306)	3	6	6	50	100	5.64064	0.0002	0.0105405	Lpt|br|slpr
Mfuzz Cluster20	molecular_function	choline dehydrogenase activity(GO:0008812)	3	13	15	23.0769	86.6667	3.42972	0.0224	0.395079	CG12398|CG9503|Eo
Mfuzz Cluster20	molecular_function	disulfide oxidoreductase activity(GO:0015036)	4	30	30	13.3333	100	2.53159	0.0426	0.553811	CG12206|CG14221|CG6776|Pdi
Mfuzz Cluster20	biological_process	ectoderm development(GO:0007398)	6	22	22	27.2727	100	5.45268	0.0002	0.0105405	E(spl)|dpp|hh|shn|ush|wg
Mfuzz Cluster20	cellular_component	endocytic vesicle(GO:0030139)	3	8	10	37.5	80	4.73843	0.0038	0.107493	comm|hh|wg
Mfuzz Cluster20	molecular_function	enhancer binding(GO:0035326)	5	19	19	26.3158	100	4.85694	0.0014	0.0520824	CrebA|brk|en|tin|vvl
Mfuzz Cluster20	biological_process	enzyme linked receptor protein signaling pathway(GO:0007167)	22	140	147	15.7143	95.2381	6.92354	0	0.0105405	Dad|E(spl)|Pi3K92E|Pvf2|aru|ato|brk|brn|bun|dlp|dpp|ex|fus|ksr|phl|rho|shn|ths|tld|tsg|tsl|ush
Mfuzz Cluster20	biological_process	epidermis development(GO:0008544)	4	14	14	28.5714	100	4.59208	0.003	0.0888361	hh|kni|puc|wg
Mfuzz Cluster20	biological_process	establishment or maintenance of cell polarity(GO:0007163)	10	119	122	8.40336	97.541	2.34889	0.037	0.5397	Rbsn-5|aos|brn|cno|crb|dgo|fj|fz3|in|phl
Mfuzz Cluster20	cellular_component	extracellular region(GO:0005576)	25	341	435	7.33138	78.3908	3.01062	0.0106	0.227797	CG13837|CG32302|CG42564|CG6933|CG7252|CG7715|Cpr47Eg|Fs|Sgs4|Sgs7|TepIV|aos|brn|dlp|dpp|ea|hh|itp|sca|spz3|tld|tsg|tsl|upd3|wg
Mfuzz Cluster20	biological_process	female meiosis chromosome segregation(GO:0016321)	4	31	31	12.9032	100	2.45317	0.0408	0.553811	Axs|Gli|sca|wapl
Mfuzz Cluster20	molecular_function	growth factor receptor binding(GO:0070851)	5	19	19	26.3158	100	4.85694	0.001	0.0408018	Pvf2|Ser|aos|kek1|ths
Mfuzz Cluster20	biological_process	JAK-STAT cascade(GO:0007259)	3	11	11	27.2727	100	3.8535	0.01	0.217543	Cdk4|Socs36E|upd3
Mfuzz Cluster20	biological_process	MAPK cascade(GO:0000165)	8	31	35	25.8065	88.5714	6.06509	0	0.0105405	Cka|Gadd45|Jra|Mekk1|Rac2|cno|puc|slpr
Mfuzz Cluster20	biological_process	mesoderm development(GO:0007498)	7	73	75	9.58904	97.3333	2.34584	0.0404	0.553811	E(spl)|dpp|hh|sna|ths|tin|wg
Mfuzz Cluster20	cellular_component	midbody(GO:0030496)	3	15	16	20	93.75	3.08583	0.0284	0.459696	Nek2|cindr|sqh
Mfuzz Cluster20	molecular_function	morphogen activity(GO:0016015)	3	6	7	50	85.7143	5.64064	0.0014	0.0520824	dpp|hh|wg
Mfuzz Cluster20	biological_process	ncRNA 3'-end processing(GO:0043628)	3	14	14	21.4286	100	3.24955	0.02	0.362869	IntS4|IntS6|Trf4-1
Mfuzz Cluster20	biological_process	negative regulation of apoptotic process(GO:0043066)	5	40	44	12.5	90.9091	2.6596	0.0268	0.447712	Duox|Sox15|bun|puc|th
Mfuzz Cluster20	biological_process	negative regulation of cell communication(GO:0010648)	22	176	179	12.5	98.324	5.6174	0	0.0105405	CG17278|CG42684|Coop|Dad|Fs|MKP-4|Mnn1|Notum|RhoGEF2|Ser|Socs36E|aos|brk|bun|crb|dlp|ex|kek1|numb|puc|spict|wg
Mfuzz Cluster20	biological_process	negative regulation of cell fate commitment(GO:0010454)	6	20	20	30	100	5.81127	0.0002	0.0105405	Socs36E|aos|bun|chn|ush|wg
Mfuzz Cluster20	biological_process	negative regulation of immune system process(GO:0002683)	3	18	19	16.6667	94.7368	2.67032	0.0466	0.553811	Jra|ush|wg
Mfuzz Cluster20	biological_process	negative regulation of molecular function(GO:0044092)	5	33	38	15.1515	86.8421	3.18072	0.0146	0.295809	MKP-4|emc|kek1|th|ush
Mfuzz Cluster20	biological_process	negative regulation of multicellular organismal process(GO:0051241)	11	105	108	10.4762	97.2222	3.2767	0.0056	0.142478	Dad|Socs36E|TBPH|chn|crb|dpp|ex|shn|spict|th|wg
Mfuzz Cluster20	biological_process	negative regulation of phosphorylation(GO:0042326)	5	29	30	17.2414	96.6667	3.54689	0.0078	0.182702	MKP-4|Mnn1|kek1|puc|wg
Mfuzz Cluster20	biological_process	negative regulation of response to stimulus(GO:0048585)	23	174	178	13.2184	97.7528	6.06471	0	0.0105405	CG17278|CG42684|Coop|Dad|Fs|Jra|Lrt|MKP-4|Mnn1|Notum|RhoGEF2|Ser|Socs36E|aos|brk|bun|crb|dlp|ex|kek1|numb|puc|spict
Mfuzz Cluster20	biological_process	negative regulation of signaling(GO:0023057)	22	174	177	12.6437	98.3051	5.6808	0	0.0105405	CG17278|CG42684|Coop|Dad|Fs|MKP-4|Mnn1|Notum|RhoGEF2|Ser|Socs36E|aos|brk|bun|crb|dlp|ex|kek1|numb|puc|spict|wg
Mfuzz Cluster20	biological_process	negative regulation of transcription from RNA polymerase II promoter(GO:0000122)	23	115	117	20	98.2906	8.58749	0	0.0105405	Coop|E(spl)|HLHm3|HLHm7|HLHmbeta|HLHmgamma|MEP-1|Nelf-A|Sox15|bi|brk|chn|dpn|emc|en|kni|lz|mirr|ovo|shn|simj|sna|ush
Mfuzz Cluster20	molecular_function	Notch binding(GO:0005112)	3	13	13	23.0769	100	3.42972	0.018	0.336939	Ser|numb|wg
Mfuzz Cluster20	biological_process	Notch signaling pathway(GO:0007219)	17	44	46	38.6364	95.6522	11.5119	0	0.0105405	Brd|E(spl)|HLHm3|HLHmbeta|HLHmgamma|Ocho|Ser|Tom|brn|cno|dpn|elB|m2|m4|malpha|mib1|numb
Mfuzz Cluster20	cellular_component	nucleus(GO:0005634)	86	1254	1407	6.85805	89.1258	5.16814	0	0.0105405	Ada1-2|CG10274|CG10306|CG10321|CG11266|CG1529|CG1677|CG16903|CG2202|CG2889|CG32533|CG3711|CG4119|CG8801|CG9609|Cka|Coop|CrebA|E(spl)|Ets21C|Gadd45|Gnf1|HLH3B|HLHm3|HLHm5|HLHm7|HLHmbeta|HLHmgamma|His2B:CG33868|Hsf|JHDM2|Jra|MED11|MEP-1|MKP-4|Mnn1|Nap1|Nelf-A|Poxn|REG|RpII15|Sox15|TBPH|TfIIFalpha|Tis11|ab|al|ato|bi|bowl|br|brk|bun|chn|cm|da|dik|dpn|elB|emc|en|grh|hh|kni|knrl|lz|m4|mirr|mit(1)15|nab…
Mfuzz Cluster20	biological_process	organ development(GO:0048513)	66	529	544	12.4764	97.2426	9.89107	0	0.0105405	Brd|CrebA|Dad|Ddc|Duox|E(spl)|HLHm3|HLHm5|HLHm7|HLHmbeta|HLHmgamma|MED11|Mnn1|Ocho|Poxn|Ser|Sox15|Tom|ab|al|aos|ato|boca|boi|bowl|brk|bun|chn|cindr|cno|crb|da|dlp|dpp|elB|emc|en|ex|fj|grh|hh|insc|kni|lz|m2|m4|malpha|mib1|noc|nub|numb|phl|puc|rho|sca|scb|sna|sqz|th|ths|tin|ush|vvl|wah|wg|wor
Mfuzz Cluster20	biological_process	organ growth(GO:0035265)	5	20	21	25	95.2381	4.68768	0.0016	0.0555545	bi|dpp|fj|hh|wg
Mfuzz Cluster20	biological_process	organ or tissue specific immune response(GO:0002251)	3	8	9	37.5	88.8889	4.73843	0.003	0.0888361	Duox|Mekk1|Tollo
Mfuzz Cluster20	biological_process	pigmentation(GO:0043473)	7	31	32	22.5806	96.875	5.16211	0.0002	0.0105405	Ddc|Duox|Socs36E|bi|dpp|hh|ovo
Mfuzz Cluster20	cellular_component	plasma membrane(GO:0005886)	24	370	395	6.48649	93.6709	2.30939	0.0418	0.553811	CG4313|Gli|ImpE3|Ir8a|Ir93a|Lrt|Ptp4E|SH3PX1|Sb|Ser|Shroom|Syx1A|Tollo|Wsck|comm|crb|fj|in|mas|ogre|rho|scb|sqh|wg
Mfuzz Cluster20	biological_process	positive regulation of cellular process(GO:0048522)	51	569	593	8.96309	95.9528	5.94785	0	0.0105405	ASPP|BRWD3|Cka|CrebA|Fs|Hsf|Jra|Listericin|Lpt|Mekk1|Mnn1|Orct2|Pi3K92E|REG|TfIIFalpha|al|ato|br|bun|chn|cindr|comm|crb|da|dik|dlp|ex|fu|grh|hh|lz|mib1|mirr|numb|ovo|phl|rho|shn|slpr|sna|tara|th|tin|tld|tna|upd2|upd3|vfl|vvl|wg|wor
Mfuzz Cluster20	molecular_function	protein dimerization activity(GO:0046983)	18	160	170	11.25	94.1176	4.55148	0.0004	0.0190409	CrebA|E(spl)|HLH3B|HLHm3|HLHm5|HLHm7|HLHmbeta|HLHmgamma|Jra|ato|bun|da|dpn|dpp|emc|grh|mirr|slpr
Mfuzz Cluster20	biological_process	regulation of cell cycle process(GO:0010564)	9	86	92	10.4651	93.4783	2.95743	0.0122	0.257801	Mnn1|Nek2|REG|ex|kni|knrl|mit(1)15|puc|wg
Mfuzz Cluster20	biological_process	regulation of cell development(GO:0060284)	14	152	157	9.21053	96.8153	3.16252	0.0094	0.209641	Liprin-alpha|Pi3K92E|Rac2|RhoGEF2|Socs36E|Syx1A|bic|lz|numb|phl|th|tutl|vvl|wg
Mfuzz Cluster20	biological_process	regulation of cell division(GO:0051302)	7	66	69	10.6061	95.6522	2.64587	0.0256	0.434219	Nek2|ex|insc|kni|knrl|mit(1)15|numb
Mfuzz Cluster20	biological_process	regulation of cell proliferation(GO:0042127)	13	101	101	12.8713	100	4.42747	0	0.0105405	Pi3K92E|Sox15|app|bun|crb|dpp|ex|grh|hh|phl|shn|upd3|wg
Mfuzz Cluster20	biological_process	regulation of chromatin modification(GO:1903308)	3	16	17	18.75	94.1176	2.936	0.033	0.508143	Lpt|Mekk1|sna
Mfuzz Cluster20	biological_process	regulation of crystal cell differentiation(GO:0042689)	3	7	7	42.8571	100	5.14391	0.003	0.0888361	Ser|ush|wg
Mfuzz Cluster20	biological_process	regulation of developmental growth(GO:0048638)	12	123	128	9.7561	96.0938	3.14631	0.0082	0.18907	Dad|Liprin-alpha|Orct2|Pi3K92E|TBPH|crb|dlp|dpp|ex|hh|phl|spict
Mfuzz Cluster20	biological_process	regulation of developmental pigmentation(GO:0048070)	4	26	27	15.3846	96.2963	2.88204	0.0244	0.421126	Ddc|Notum|mgl|wg
Mfuzz Cluster20	biological_process	regulation of endocytosis(GO:0030100)	7	22	23	31.8182	95.6522	6.52408	0	0.0105405	Rbsn-5|cindr|comm|mgl|mib1|numb|wah
Mfuzz Cluster20	biological_process	regulation of mitotic cell cycle(GO:0007346)	13	164	171	7.92683	95.9064	2.45491	0.0288	0.462641	BRWD3|Mnn1|Nek2|REG|RpII15|ex|hh|kni|knrl|mit(1)15|puc|wah|wg
Mfuzz Cluster20	biological_process	regulation of nervous system development(GO:0051960)	14	150	156	9.33333	96.1538	3.2174	0.0068	0.166318	Dad|Liprin-alpha|Lrrk|Pi3K92E|Rac2|RhoGEF2|Socs36E|TBPH|insc|numb|phl|spict|tutl|vvl
Mfuzz Cluster20	biological_process	regulation of organ morphogenesis(GO:2000027)	8	58	59	13.7931	98.3051	3.70128	0.0052	0.133452	Socs36E|chn|dpp|fj|lz|shn|th|wg
Mfuzz Cluster20	biological_process	regulation of sequence-specific DNA binding transcription factor activity(GO:0051090)	3	14	14	21.4286	100	3.24955	0.023	0.404855	fu|hh|ush
Mfuzz Cluster20	biological_process	regulation of signal transduction(GO:0009966)	41	392	410	10.4592	95.6098	6.40803	0	0.0105405	BRWD3|CG10188|CG17278|CG3402|CG42674|CG42684|Cka|Coop|Dad|Fs|Listericin|MKP-4|Mekk1|Mnn1|Notum|RhoGEF2|Ser|Socs36E|Spred|al|aos|ato|boi|brk|bun|cno|crb|dlp|ex|hh|kek1|mib1|numb|puc|rho|slpr|spict|tld|tsg|upd2|upd3
Mfuzz Cluster20	biological_process	regulation of tube size, open tracheal system(GO:0035151)	4	18	19	22.2222	94.7368	3.85456	0.0082	0.18907	Gli|kni|knrl|pck
Mfuzz Cluster20	biological_process	response to organic cyclic compound(GO:0014070)	5	35	38	14.2857	92.1053	3.01845	0.0148	0.298495	Duox|Gr66a|Hsf|Lpt|br
Mfuzz Cluster20	biological_process	response to wounding(GO:0009611)	7	49	50	14.2857	98	3.57399	0.0048	0.127625	CG15170|Ddc|Jra|lz|puc|scb|sqh
Mfuzz Cluster20	molecular_function	RNA polymerase II transcription regulatory region sequence-specific DNA binding transcription factor activity involved in negative regulation of transcription(GO:0001227)	7	21	21	33.3333	100	6.72266	0.0002	0.0105405	E(spl)|HLHm5|HLHm7|chn|dpn|en|kni
Mfuzz Cluster20	biological_process	sensory perception of taste(GO:0050909)	6	28	72	21.4286	38.8889	4.59879	0.001	0.0408018	Gr43a|Gr47b|Gr59e|Gr61a|Gr66a|Gr77a
Mfuzz Cluster20	molecular_function	sequence-specific DNA binding(GO:0043565)	28	283	296	9.89399	95.6081	4.92981	0	0.0105405	CrebA|E(spl)|Ets21C|HLHm3|HLHm5|HLHm7|HLHmbeta|HLHmgamma|Hsf|Jra|al|br|brk|chn|da|en|grh|kni|knrl|lz|mirr|nub|ovo|pdm2|sna|tin|vfl|vvl
Mfuzz Cluster20	biological_process	sex determination(GO:0007530)	5	24	24	20.8333	100	4.11024	0.0044	0.11987	da|dpn|emc|ovo|snf
Mfuzz Cluster20	biological_process	single-organism developmental process(GO:0044767)	168	2170	2296	7.74194	94.5122	9.5228	0	0.0105405	BBS8|Brd|CG13427|CG1399|CG14073|CG14478|CG1677|CG16903|CG1789|CG42684|CG4364|CG43736|CG5224|CG6398|CG8860|Cdk4|Cka|CrebA|Dad|Ddc|Dok|Duox|E(spl)|Ets21C|Gli|Gnf1|HLHm3|HLHm5|HLHm7|HLHmbeta|HLHmgamma|Hsf|ImpE3|IntS4|Jra|Liprin-alpha|Lpt|MED11|MEP-1|Mnn1|Muc12Ea|Notum|Oaz|Ocho|Orct2|Ost48|Pi3K92E|Poxn|Pvf2|Rac2|Rbsn-5|RhoGEF2|RpII15|Sb|Ser|Shroom|Sip1|Socs36E|Sox15|Spred|Syx1A|TfIIFalpha|Tollo|Tom|T…
Mfuzz Cluster20	biological_process	smoothened signaling pathway(GO:0007224)	6	30	32	20	93.75	4.36731	0.0012	0.0476448	ato|boi|dlp|fu|hh|mirr
Mfuzz Cluster20	molecular_function	sodium channel activity(GO:0005272)	4	20	37	20	54.0541	3.5641	0.0142	0.288364	CG34369|ppk|ppk12|ppk13
Mfuzz Cluster20	biological_process	sodium ion transmembrane transport(GO:0035725)	4	17	31	23.5294	54.8387	4.01655	0.0088	0.199272	CG34369|ppk|ppk12|ppk13
Mfuzz Cluster20	biological_process	somatic stem cell division(GO:0048103)	5	41	41	12.1951	100	2.59458	0.0294	0.468179	hh|insc|numb|sna|wor
Mfuzz Cluster20	biological_process	stress-activated protein kinase signaling cascade(GO:0031098)	8	27	31	29.6296	87.0968	6.65772	0	0.0105405	Cka|Dok|Gadd45|Jra|Rac2|cno|puc|slpr
Mfuzz Cluster20	biological_process	system development(GO:0048731)	42	296	307	14.1892	96.4169	8.81091	0	0.0105405	Cdk4|E(spl)|HLHm5|HLHmbeta|HLHmgamma|Poxn|Ptp4E|Rac2|ato|brk|bun|chn|comm|crb|da|dib|dpp|elB|emc|en|fz3|grh|hh|insc|kni|knrl|lz|mirr|noc|numb|ogre|pck|pdm2|puc|rho|sca|scb|shn|sna|tutl|vvl|wor
Mfuzz Cluster20	molecular_function	taste receptor activity(GO:0008527)	6	18	53	33.3333	33.9623	6.22304	0	0.0105405	Gr43a|Gr47b|Gr59e|Gr61a|Gr66a|Gr77a
Mfuzz Cluster20	molecular_function	transcription factor binding(GO:0008134)	11	106	108	10.3774	98.1481	3.24108	0.0076	0.178964	Coop|HLHm7|HLHmgamma|Jra|TfIIFalpha|da|kni|nab|shn|sna|ush
Mfuzz Cluster20	UserSuppliedAssociations	transcription_factors	65	732	754	8.87978	97.0822	7.72846	0	0.00786667	CG10274|CG10321|CG11122|CG13204|CG14438|CG14860|CG1529|CG1832|CG2202|CG2889|CG5245|CG9609|CG9890|CR43671|Coop|CrebA|E(spl)|Ets21C|FBgn0264954|FBgn0267337|HLH3B|HLHm3|HLHm5|HLHm7|HLHmbeta|HLHmgamma|Hsf|Jra|Lpt|MEP-1|Oaz|Poxn|Rbsn-5|Sox15|ab|al|ato|bi|bowl|br|brk|bun|chn|da|dpn|elB|emc|en|grh|kni|knrl|lz|mirr|noc|nub|ovo|pdm2|shn|sna|sqz|tin|ush|vfl|vvl|wor
Mfuzz Cluster20	cellular_component	transcriptional repressor complex(GO:0017053)	3	18	19	16.6667	94.7368	2.67032	0.0428	0.553811	MEP-1|Nelf-A|simj
Mfuzz Cluster20	biological_process	ventral midline development(GO:0007418)	3	6	6	50	100	5.64064	0.0012	0.0476448	en|hh|wg
Mfuzz Cluster20	molecular_function	Wnt-protein binding(GO:0017147)	3	12	12	25	100	3.62961	0.0148	0.298495	dlp|fj|fz3
Mfuzz Cluster21	molecular_function	acid-thiol ligase activity(GO:0016878)	3	13	14	23.0769	92.8571	3.38966	0.0084	0.301108	ATPCL|AcCoAS|CG11453
Mfuzz Cluster21	biological_process	aminoglycan catabolic process(GO:0006026)	5	28	32	17.8571	87.5	3.60109	0.0038	0.182854	Cht4|Cht5|Idgf3|PGRP-LB|PGRP-LF
Mfuzz Cluster21	biological_process	carbohydrate metabolic process(GO:0005975)	23	261	274	8.81226	95.2555	3.75207	0	0.0175327	ATPCL|Arf51F|CG10000|CG10467|CG10688|CG1271|CG30463|CG33080|CG33138|CG8668|CG8708|Cht4|Cht5|FucT6|FucTC|Galt|Gk|Hex-C|Idgf3|Pgd|Tps1|Zw|pgant6
Mfuzz Cluster21	biological_process	carbohydrate transport(GO:0008643)	3	8	10	37.5	80	4.69062	0.0026	0.142101	CG33281|Csat|Tret1-1
Mfuzz Cluster21	molecular_function	carbonate dehydratase activity(GO:0004089)	3	16	17	18.75	94.1176	2.89851	0.0178	0.483439	CAH1|CAH2|CG3940
Mfuzz Cluster21	biological_process	cellular lipid catabolic process(GO:0044242)	4	29	30	13.7931	96.6667	2.57362	0.0202	0.526032	CDase|Jheh1|Jheh3|bmm
Mfuzz Cluster21	molecular_function	chitinase activity(GO:0004568)	3	19	19	15.7895	100	2.51585	0.0288	0.59658	Cht4|Cht5|Idgf3
Mfuzz Cluster21	molecular_function	CoA-ligase activity(GO:0016405)	3	12	13	25	92.3077	3.58844	0.0074	0.275292	ATPCL|AcCoAS|CG11453
Mfuzz Cluster21	molecular_function	copper ion binding(GO:0005507)	4	22	22	18.1818	100	3.26698	0.0094	0.326383	CG3759|lox2|mex1|mt:CoII
Mfuzz Cluster21	molecular_function	electron carrier activity(GO:0009055)	23	152	172	15.1316	88.3721	6.75688	0	0.0175327	CG1275|Cyp12a4|Cyp12a5|Cyp12b2|Cyp12c1|Cyp305a1|Cyp4e3|Cyp4p1|Cyp6a14|Cyp6a17|Cyp6a21|Cyp6a22|Cyp6a8|Cyp6g1|Cyp6t1|Cyp6w1|Cyp9b2|Cyp9f2|mex1|mt:CoII|mt:CoIII|mt:Cyt-b|ry
Mfuzz Cluster21	molecular_function	endopeptidase inhibitor activity(GO:0004866)	7	65	97	10.7692	67.0103	2.64206	0.0102	0.336981	CG17739|CG30203|CG31313|CG8066|Kaz1-ORFB|m1|nec
Mfuzz Cluster21	molecular_function	galactosyltransferase activity(GO:0008378)	3	22	24	13.6364	91.6667	2.20416	0.0418	0.626222	CG8668|CG8708|tgy
Mfuzz Cluster21	molecular_function	glucuronosyltransferase activity(GO:0015020)	4	27	34	14.8148	79.4118	2.74776	0.0178	0.483439	CG10178|CG15661|GlcAT-P|Ugt86Dh
Mfuzz Cluster21	biological_process	glutamine family amino acid metabolic process(GO:0009064)	4	25	28	16	89.2857	2.93923	0.0116	0.366809	CG7470|CG8745|l(3)72Dr|ry
Mfuzz Cluster21	molecular_function	heme binding(GO:0020037)	18	121	138	14.876	87.6812	5.87829	0	0.0175327	Cyp12a4|Cyp12a5|Cyp12b2|Cyp12c1|Cyp305a1|Cyp4e3|Cyp4p1|Cyp6a14|Cyp6a17|Cyp6a21|Cyp6a22|Cyp6a8|Cyp6g1|Cyp6t1|Cyp6w1|Cyp9b2|Cyp9f2|mt:CoII
Mfuzz Cluster21	molecular_function	hydrolase activity, acting on carbon-nitrogen (but not peptide) bonds(GO:0016810)	8	82	91	9.7561	90.1099	2.51133	0.0098	0.332449	CDase|CG30016|CG31373|CG32626|CG4752|PGRP-LB|PGRP-LF|vanin-like
Mfuzz Cluster21	UserSuppliedAssociations	IFM72vs30h_log2FC>2	159	1537	1537	10.3448	100	13.929	0	0.00118	AcCoAS|Akh|AlCR2|CAH1|CAH2|CG10116|CG10513|CG10550|CG10562|CG10650|CG10680|CG10911|CG10912|CG11378|CG11384|CG11407|CG11453|CG11592|CG11892|CG12512|CG1275|CG12974|CG13077|CG13116|CG13360|CG13587|CG13704|CG14120|CG14160|CG14292|CG14356|CG14777|CG14780|CG15096|CG15152|CG15201|CG15661|CG15818|CG17026|CG17839|CG18088|CG18480|CG2556|CG30016|CG30345|CG30371|CG30411|CG3091|CG31004|CG31103|CG31104|CG31202…
Mfuzz Cluster21	biological_process	inorganic anion transport(GO:0015698)	11	35	35	31.4286	100	8.03268	0	0.0175327	CG5002|CG5404|CG9090|CG9702|ClC-a|MFS15|Mpcp|NaPi-T|Picot|Vmat|hoe1
Mfuzz Cluster21	cellular_component	integral component of membrane(GO:0016021)	76	928	1125	8.18966	82.4889	6.33938	0	0.0175327	5-HT2|ACXD|Ac13E|AlCR2|CG10165|CG11163|CG1213|CG1275|CG13077|CG14160|CG14777|CG14778|CG14857|CG15096|CG15408|CG16727|CG30345|CG31103|CG31272|CG3164|CG3168|CG31729|CG31793|CG32669|CG32795|CG3285|CG33281|CG3690|CG4301|CG4607|CG5002|CG5404|CG7084|CG7497|CG7589|CG7881|CG8034|CG8051|CG8249|CG8596|CG8654|CG8837|CG9702|Csat|Ctr1B|Fie|FucT6|GRHRII|Irk2|Irk3|Lgr1|MFS15|MFS18|NaPi-T|Nha2|Nhe2|PGRP-LB|PGRP-…
Mfuzz Cluster21	molecular_function	iron ion binding(GO:0005506)	18	123	156	14.6341	78.8462	5.79286	0	0.0175327	CG31373|Cyp12a4|Cyp12a5|Cyp12b2|Cyp12c1|Cyp305a1|Cyp4e3|Cyp4p1|Cyp6a17|Cyp6a21|Cyp6a22|Cyp6a8|Cyp6g1|Cyp6t1|Cyp6w1|Cyp9b2|Cyp9f2|ry
Mfuzz Cluster21	molecular_function	lipase activity(GO:0016298)	7	77	92	9.09091	83.6957	2.14116	0.0194	0.509696	CG10116|CG14945|CG31272|CG42237|CG8552|bmm|sws
Mfuzz Cluster21	biological_process	lipid transport(GO:0006869)	3	23	30	13.0435	76.6667	2.11205	0.0468	0.675966	CG31729|CG4301|Npc2b
Mfuzz Cluster21	biological_process	membrane fusion(GO:0061025)	3	18	18	16.6667	100	2.63411	0.025	0.57654	CDase|Syx7|form3
Mfuzz Cluster21	cellular_component	membrane(GO:0016020)	85	1120	1284	7.58929	87.2274	5.97756	0	0.0175327	5-HT2|Arf51F|CG10702|CG1213|CG12746|CG13189|CG14778|CG15096|CG15408|CG1907|CG2187|CG30345|CG31103|CG31202|CG31272|CG3164|CG3168|CG31729|CG32669|CG3285|CG33281|CG33970|CG4301|CG4585|CG4607|CG4928|CG5508|CG5969|CG6723|CG7255|CG7470|CG7589|CG8249|CG8668|CG8708|CG8837|ClC-a|Cog3|Csat|Ctr1B|Cyp305a1|Cyp4e3|Cyp4p1|Cyp6a17|Cyp6a21|Cyp6a22|Cyp6a8|Cyp6g1|Cyp6t1|Cyp6w1|Cyp9b2|Cyp9f2|Dhap-at|FucT6|FucTC|Glc…
Mfuzz Cluster21	molecular_function	methyl indole-3-acetate esterase activity(GO:0080030)	5	28	32	17.8571	87.5	3.60109	0.0012	0.0769913	CG6018|Est-Q|alpha-Est5|alpha-Est7|alpha-Est8
Mfuzz Cluster21	molecular_function	methyl jasmonate esterase activity(GO:0080032)	5	28	32	17.8571	87.5	3.60109	0.0012	0.0769913	CG6018|Est-Q|alpha-Est5|alpha-Est7|alpha-Est8
Mfuzz Cluster21	molecular_function	methyl salicylate esterase activity(GO:0080031)	5	28	32	17.8571	87.5	3.60109	0.0012	0.0769913	CG6018|Est-Q|alpha-Est5|alpha-Est7|alpha-Est8
Mfuzz Cluster21	cellular_component	microbody(GO:0042579)	4	30	31	13.3333	96.7742	2.49216	0.0252	0.57654	CG10253|CG14778|Dhap-at|ry
Mfuzz Cluster21	cellular_component	mitochondrial envelope(GO:0005740)	7	48	56	14.5833	85.7143	3.5875	0.0018	0.106248	CG18327|CG18347|CG1907|CG5646|CG9090|Mpcp|aralar1
Mfuzz Cluster21	cellular_component	mitochondrion(GO:0005739)	18	254	269	7.08661	94.4238	2.31281	0.02	0.523905	CG17896|CG1907|CG7470|CG8745|Cyp12a4|Cyp12a5|Cyp12b2|Cyp12c1|Dhap-at|Fmo-2|Mpcp|mt:ATPase6|mt:CoII|mt:CoIII|mt:ND4|mt:ND4L|mt:ND5|whd
Mfuzz Cluster21	UserSuppliedAssociations	MitoExplorer_all genes	54	1002	1065	5.38922	94.0845	2.4119	0.0272	0.0891556	AcCoAS|CAH1|CAH2|CG10467|CG11407|CG12512|CG13295|CG14777|CG14778|CG1532|CG17734|CG17896|CG18327|CG18347|CG18812|CG1907|CG32230|CG3270|CG33970|CG3835|CG3940|CG4623|CG5500|CG5508|CG5646|CG7470|CG8128|CG8520|CG8665|CG8745|CG9090|CG9399|CG9451|CtsB1|Cyp12a4|Cyp12a5|Cyp12b2|Cyp12c1|Gk|Hex-C|Jheh1|Mipp1|Mpcp|aralar1|cu|fbl|mt:ATPase6|mt:CoII|mt:CoIII|mt:Cyt-b|mt:ND4|mt:ND4L|mt:ND5|whd
Mfuzz Cluster21	UserSuppliedAssociations	MitoExplorer_Metabolism_of_Vitamins_&_Co-Factors	5	17	17	29.4118	100	5.36871	0.0002	0.00118	Cyp12a4|Cyp12a5|Cyp12b2|Cyp12c1|fbl
Mfuzz Cluster21	UserSuppliedAssociations	MitoExplorer_Mitochondrial_Carrier	6	39	45	15.3846	86.6667	3.65082	0.0024	0.0108923	CG18327|CG18347|CG1907|CG5646|CG9090|Mpcp
Mfuzz Cluster21	UserSuppliedAssociations	MitoExplorer_Nitrogen_Metabolism	3	20	21	15	95.2381	2.52373	0.0338	0.09971	CAH1|CAH2|CG3940
Mfuzz Cluster21	biological_process	monovalent inorganic cation homeostasis(GO:0055067)	3	11	11	27.2727	100	3.81106	0.005	0.213865	Nhe2|Rbcn-3B|Vha68-2
Mfuzz Cluster21	biological_process	monovalent inorganic cation transport(GO:0015672)	15	139	163	10.7914	85.2761	3.8912	0	0.0175327	Indy|Irk2|Irk3|MFS15|Nha2|Nhe2|Ork1|Vha100-5|Vha13|Vha14-1|Vha44|Vha68-2|Vmat|mt:ATPase6|nrv1
Mfuzz Cluster21	molecular_function	NADP binding(GO:0050661)	3	13	13	23.0769	100	3.38966	0.0104	0.339785	Fmo-2|Pgd|Zw
Mfuzz Cluster21	biological_process	negative regulation of multi-organism process(GO:0043901)	4	20	21	20	95.2381	3.51993	0.0052	0.219242	PGRP-LB|Rab7|TSG101|pirk
Mfuzz Cluster21	molecular_function	neuropeptide hormone activity(GO:0005184)	5	32	35	15.625	91.4286	3.22072	0.0044	0.197754	Akh|Ast-C|Nplp2|Tk|sNPF
Mfuzz Cluster21	biological_process	neuropeptide signaling pathway(GO:0007218)	5	36	39	13.8889	92.3077	2.89713	0.0084	0.301108	Akh|Ast-C|Nplp2|Tk|sNPF
Mfuzz Cluster21	biological_process	neutral lipid metabolic process(GO:0006638)	4	11	12	36.3636	91.6667	5.31328	0.0002	0.0175327	Seipin|Thor|bmm|schlank
Mfuzz Cluster21	molecular_function	O-acyltransferase activity(GO:0008374)	5	21	22	23.8095	95.4545	4.47726	0.0004	0.0321964	CG4753|CG5397|CG5508|Dhap-at|whd
Mfuzz Cluster21	biological_process	one-carbon metabolic process(GO:0006730)	3	13	14	23.0769	92.8571	3.38966	0.013	0.390176	CAH1|CG3940|CG8665
Mfuzz Cluster21	biological_process	organic anion transport(GO:0015711)	9	70	77	12.8571	90.9091	3.61542	0.0006	0.0439041	CG1139|CG1907|CG31729|CG4301|CG7255|Csat|Oatp33Ea|Oatp33Eb|Oatp58Da
Mfuzz Cluster21	biological_process	organophosphate ester transport(GO:0015748)	3	16	18	18.75	88.8889	2.89851	0.0148	0.422707	CG31729|CG4301|Csat
Mfuzz Cluster21	biological_process	oxidation-reduction process(GO:0055114)	43	487	546	8.82957	89.1941	5.20542	0	0.0175327	CG10253|CG17896|CG32170|CG32230|CG3270|CG33138|CG3597|CG3609|CG3759|CG3835|CG7470|CG8630|CG8665|CG9509|Cyp12a4|Cyp12a5|Cyp12b2|Cyp12c1|Cyp305a1|Cyp4e3|Cyp4p1|Cyp6a14|Cyp6a17|Cyp6a21|Cyp6a22|Cyp6a8|Cyp6g1|Cyp6t1|Cyp6w1|Cyp9b2|Cyp9f2|Fmo-2|Pgd|Zw|lox2|mex1|mt:CoII|mt:CoIII|mt:Cyt-b|mt:ND4|mt:ND4L|mt:ND5|ry
Mfuzz Cluster21	molecular_function	oxidoreductase activity, acting on paired donors, with incorporation or reduction of molecular oxygen(GO:0016705)	19	134	167	14.1791	80.2395	5.78564	0	0.0175327	CG8630|Cyp12a4|Cyp12a5|Cyp12b2|Cyp12c1|Cyp305a1|Cyp4e3|Cyp4p1|Cyp6a14|Cyp6a17|Cyp6a21|Cyp6a22|Cyp6a8|Cyp6g1|Cyp6t1|Cyp6w1|Cyp9b2|Cyp9f2|Fmo-2
Mfuzz Cluster21	biological_process	phospholipid metabolic process(GO:0006644)	9	92	100	9.78261	92	2.67412	0.0068	0.264067	CG17026|CG17029|CG42237|CG4585|CG5508|Dhap-at|Seipin|ry|sws
Mfuzz Cluster21	molecular_function	polypeptide N-acetylgalactosaminyltransferase activity(GO:0004653)	4	11	14	36.3636	78.5714	5.31328	0.0004	0.0321964	CG10000|CG30463|pgant4|pgant6
Mfuzz Cluster21	biological_process	purine nucleobase metabolic process(GO:0006144)	3	14	14	21.4286	100	3.21046	0.0114	0.361776	CG30016|Prat2|ry
Mfuzz Cluster21	biological_process	pyrimidine nucleobase metabolic process(GO:0006206)	3	9	9	33.3333	100	4.35267	0.001	0.0675878	CG17896|b|ry
Mfuzz Cluster21	biological_process	regulation of lipid biosynthetic process(GO:0046890)	4	8	9	50	88.8889	6.45187	0.0004	0.0321964	Ast-C|Seipin|Vha44|schlank
Mfuzz Cluster21	biological_process	regulation of lipid storage(GO:0010883)	3	15	15	20	100	3.04759	0.0138	0.407284	Indy|Seipin|bmm
Mfuzz Cluster21	biological_process	regulation of transmembrane transport(GO:0034762)	3	18	20	16.6667	90	2.63411	0.027	0.594672	ClC-a|Irk2|Irk3
Mfuzz Cluster21	biological_process	response to alkaloid(GO:0043279)	3	9	11	33.3333	81.8182	4.35267	0.0036	0.17708	CG8147|CG8745|Cyp6a8
Mfuzz Cluster21	biological_process	response to metal ion(GO:0010038)	4	18	19	22.2222	94.7368	3.80887	0.0036	0.17708	CG31345|Ctr1B|MtnE|whd
Mfuzz Cluster21	biological_process	response to organic cyclic compound(GO:0014070)	4	35	38	11.4286	92.1053	2.1304	0.0336	0.59658	CG8147|CG8745|Cyp6a8|Cyp6g1
Mfuzz Cluster21	biological_process	response to toxic substance(GO:0009636)	5	16	16	31.25	100	5.3903	0.0006	0.0439041	Cyp12a4|Cyp6g1|GstE9|Jheh1|Jheh3
Mfuzz Cluster21	molecular_function	retinyl-palmitate esterase activity(GO:0050253)	6	47	57	12.766	82.4561	2.92787	0.0058	0.237746	CG6018|Est-Q|alpha-Est5|alpha-Est7|alpha-Est8|bmm
Mfuzz Cluster21	UserSuppliedAssociations	Salm core 133 genes (Spletter et al, 2015)	12	131	133	9.16031	98.4962	3.05413	0.004	0.0168571	CG13587|CG17734|CG33138|CG42237|CG5646|CG6723|CG8630|CG9399|Cht5|NTPase|Tret1-1|sws
Mfuzz Cluster21	biological_process	sphingolipid metabolic process(GO:0006665)	5	26	26	19.2308	100	3.81898	0.0018	0.106248	CDase|GlcAT-P|Sap-r|Sk1|schlank
Mfuzz Cluster21	molecular_function	transferase activity, transferring alkyl or aryl (other than methyl) groups(GO:0016765)	7	58	59	12.069	98.3051	2.98921	0.0056	0.230616	CG10253|CG1681|GstE10|GstE3|GstE6|GstE9|betaggt-I
Mfuzz Cluster21	biological_process	transmembrane transport(GO:0055085)	53	426	473	12.4413	90.0634	8.64687	0	0.0175327	CG11163|CG1139|CG1213|CG13189|CG14160|CG14857|CG15096|CG15408|CG16727|CG18347|CG2187|CG30345|CG31103|CG31272|CG3168|CG31793|CG32669|CG3285|CG33281|CG3690|CG4607|CG6723|CG7084|CG7255|CG7881|CG8034|CG8051|CG8249|CG8596|CG8654|CG8837|ClC-a|Csat|Ctr1B|Indy|MFS15|MFS18|NaPi-T|Nha2|Nhe2|Ork1|Picot|Smvt|Tret1-1|Vha100-5|Vha14-1|Vha44|Vha68-2|Vmat|aralar1|hoe1|mt:ATPase6|sut2
Mfuzz Cluster21	UserSuppliedAssociations	transmembrane_proteins	174	2736	3089	6.35965	88.5724	7.53148	0	0.00118	5-HT2|ACXD|Ac13E|AlCR2|CG10165|CG10178|CG10550|CG10702|CG11163|CG11378|CG1139|CG11592|CG1213|CG1265|CG1271|CG12746|CG1275|CG12824|CG12945|CG12974|CG13004|CG13077|CG13116|CG13189|CG13603|CG13605|CG13704|CG14160|CG14195|CG14777|CG14778|CG14857|CG15096|CG15152|CG15408|CG15661|CG15706|CG16727|CG17734|CG17739|CG17839|CG18347|CG18480|CG1907|CG2183|CG2187|CG30345|CG31004|CG3106|CG31103|CG31272|CG3164|CG…
Mfuzz Cluster21	molecular_function	transporter activity(GO:0005215)	81	753	875	10.757	86.0571	9.30448	0	0.0175327	CG11163|CG1139|CG11407|CG1213|CG12926|CG13189|CG14160|CG14857|CG15096|CG15408|CG16727|CG18327|CG18347|CG1907|CG2187|CG30345|CG3091|CG31103|CG31272|CG3164|CG3168|CG31729|CG31793|CG32669|CG3285|CG33281|CG33970|CG3759|CG4301|CG4607|CG4830|CG5002|CG5404|CG5646|CG6723|CG7084|CG7255|CG7589|CG7881|CG8051|CG8249|CG8654|CG8837|CG9090|CG9702|ClC-a|Csat|Ctr1B|Indy|Irk2|Irk3|MFS15|MFS18|Mpcp|NaPi-T|Nha2|Nhe2…
Mfuzz Cluster21	molecular_function	UDP-N-acetylmuramate dehydrogenase activity(GO:0008762)	3	3	3	100	100	8.26305	0	0.0175327	CG10253|CG3835|ry
Mfuzz Cluster21	cellular_component	vacuolar proton-transporting V-type ATPase, V1 domain(GO:0000221)	4	14	15	28.5714	93.3333	4.54224	0.0006	0.0439041	Vha13|Vha14-1|Vha44|Vha68-2
Mfuzz Cluster21	cellular_component	vacuole(GO:0005773)	5	31	34	16.129	91.1765	3.3098	0.0048	0.210392	Atg8a|Cp1|Gie|Rbcn-3B|Sap-r
Mfuzz Cluster21	UserSuppliedAssociations	WTvssalm_99hAPF_log2FC>2	41	448	448	9.15179	100	5.73549	0	0.00118	CG10405|CG13587|CG14777|CG14780|CG17734|CG1907|CG31313|CG32985|CG33138|CG3759|CG42237|CG4741|CG4830|CG5500|CG5646|CG6723|CG8520|CG8630|CG8664|CG8745|CG9090|CG9399|CG9451|Cht5|FBgn0267463|NTPase|Npl4|Tret1-1|alphaTub84D|cu|lox2|mt:ATPase6|mt:CoIII|mt:Cyt-b|mt:ND4L|mt:lrRNA|pgant4|retn|sws|tgy|vanin-like
Mfuzz Cluster22	molecular_function	actin binding(GO:0003779)	7	111	119	6.30631	93.2773	2.00898	0.0254	0.462376	Actn|Fim|Mp20|Tm1|Tm2|shi|wupA
Mfuzz Cluster22	molecular_function	active transmembrane transporter activity(GO:0022804)	25	304	322	8.22368	94.4099	5.33296	0	0.0150068	ABCB7|ATPsyn-gamma|Atpalpha|CG10226|CG11897|CG14856|CG1824|CG2930|CG31689|CG3476|CG42269|CG43066|CG5549|CG6293|CG9281|CG9657|Ca-P60A|Hmt-1|MFS10|Mdr65|Mvl|Nhe3|VhaM9.7-c|blw|sesB
Mfuzz Cluster22	biological_process	associative learning(GO:0008306)	5	58	61	8.62069	95.082	2.47675	0.0168	0.390413	Gad1|Mob2|Pp1-87B|Sap47|shi
Mfuzz Cluster22	molecular_function	ATP binding(GO:0005524)	32	655	692	4.8855	94.6532	2.83196	0.005	0.172257	ABCB7|Act88F|Atpalpha|CG10226|CG11897|CG1824|CG31689|CG4538|CG6364|CG9281|CG9813|Ca-P60A|CkIalpha|Dpck|Hmt-1|Klp68D|Mdr65|Mhc|Pdk1|Pex1|Pex6|Pfrx|PhKgamma|Pink1|Wnk|blw|c12.2|ird1|pix|sev|skap|trc
Mfuzz Cluster22	molecular_function	ATPase activity, coupled to movement of substances(GO:0043492)	13	134	139	9.70149	96.4029	4.51195	0	0.0150068	ABCB7|ATPsyn-gamma|Atpalpha|CG10226|CG11897|CG1824|CG31689|CG9281|Ca-P60A|Hmt-1|Mdr65|VhaM9.7-c|blw
Mfuzz Cluster22	biological_process	autophagy(GO:0006914)	3	24	25	12.5	96	2.69748	0.0224	0.462376	SNF4Agamma|ctp|ird1
Mfuzz Cluster22	biological_process	axon cargo transport(GO:0008088)	5	18	18	27.7778	100	6.1098	0.0002	0.0150068	Dlic|Klp68D|milt|sw|syd
Mfuzz Cluster22	cellular_component	bounding membrane of organelle(GO:0098588)	7	100	106	7	94.3396	2.3114	0.0144	0.351233	CG14767|Ca-P60A|Hmt-1|Marf|Pex1|alpha-Man-I|jagn
Mfuzz Cluster22	molecular_function	calcium ion binding(GO:0005509)	11	198	213	5.55556	92.9577	2.07429	0.0426	0.605426	Actn|Cbp53E|Fim|Gpo-1|Mlc1|Mlc2|Mp20|Plc21C|TpnC25D|alpha-Man-I|up
Mfuzz Cluster22	molecular_function	calmodulin binding(GO:0005516)	3	26	29	11.5385	89.6552	2.5223	0.0312	0.490666	CG7766|CG8475|PhKgamma
Mfuzz Cluster22	biological_process	cellular calcium ion homeostasis(GO:0006874)	4	11	12	36.3636	91.6667	6.43217	0	0.0150068	Ca-P60A|Cbp53E|sesB|up
Mfuzz Cluster22	biological_process	chaeta development(GO:0022416)	5	52	53	9.61538	98.1132	2.76284	0.0136	0.339195	CG9932|Mf|Xbp1|jagn|trc
Mfuzz Cluster22	cellular_component	coated vesicle(GO:0030135)	4	21	25	19.0476	84	4.27036	0.0024	0.0997634	AP-50|Bap|p24-1|syd
Mfuzz Cluster22	molecular_function	coenzyme binding(GO:0050662)	15	125	136	12	91.9118	5.86033	0	0.0150068	CG1970|CG5028|CG6020|CG6439|CG7430|CG7979|CG8768|CG8814|CG9140|Cpr|Gapdh1|Nc73EF|SdhA|l(1)G0156|slgA
Mfuzz Cluster22	biological_process	cofactor transport(GO:0051181)	3	7	8	42.8571	87.5	6.12994	0.0002	0.0150068	ABCB7|CG3476|Hmt-1
Mfuzz Cluster22	cellular_component	contractile fiber part(GO:0044449)	14	30	33	46.6667	90.9091	13.9206	0	0.0150068	Actn|Ald|Gapdh1|Mf|Mhc|Mlc1|Mlc2|Pgk|Tm1|Tm2|Tpi|Zasp66|up|wupA
Mfuzz Cluster22	cellular_component	cytochrome complex(GO:0070069)	3	29	31	10.3448	93.5484	2.28973	0.0374	0.553745	CG18809|CG4169|CG4769
Mfuzz Cluster22	cellular_component	cytoplasmic dynein complex(GO:0005868)	3	24	27	12.5	88.8889	2.69748	0.0238	0.462376	Dlic|ctp|sw
Mfuzz Cluster22	biological_process	developmental cell growth(GO:0048588)	4	35	36	11.4286	97.2222	2.8899	0.0118	0.306385	Sh|cue|jagn|kay
Mfuzz Cluster22	biological_process	dicarboxylic acid metabolic process(GO:0043648)	4	24	27	16.6667	88.8889	3.88647	0.0034	0.129757	Gad1|Mdh2|l(1)G0255|slgA
Mfuzz Cluster22	molecular_function	drug transporter activity(GO:0090484)	3	15	15	20	100	3.82278	0.0042	0.149947	CG10226|CG11897|Mdr65
Mfuzz Cluster22	biological_process	embryonic development via the syncytial blastoderm(GO:0001700)	4	46	50	8.69565	92	2.23402	0.028	0.462376	Atpalpha|KCNQ|Mo25|gw
Mfuzz Cluster22	biological_process	energy taxis(GO:0009453)	3	16	17	18.75	94.1176	3.65723	0.007	0.218232	Ace|Gycalpha99B|slgA
Mfuzz Cluster22	biological_process	epithelial cell migration, open tracheal system(GO:0007427)	3	31	31	9.67742	100	2.15109	0.0468	0.648462	Mhc|csw|shi
Mfuzz Cluster22	biological_process	establishment of vesicle localization(GO:0051650)	8	53	60	15.0943	88.3333	5.11618	0	0.0150068	Rop|Snap25|cpx|endoA|sesB|shi|stmA|tomosyn
Mfuzz Cluster22	biological_process	exocytosis(GO:0006887)	5	28	32	17.8571	87.5	4.56572	0	0.0150068	Rop|cpx|jagn|stmA|tomosyn
Mfuzz Cluster22	biological_process	flight behavior(GO:0007629)	7	20	21	35	95.2381	8.32191	0	0.0150068	Actn|Ca-P60A|Gpo-1|Hk|Plc21C|Sh|sesB
Mfuzz Cluster22	biological_process	generation of precursor metabolites and energy(GO:0006091)	21	118	123	17.7966	95.935	9.37704	0	0.0150068	Ald|CG18809|CG1970|CG32649|CG4169|CG4769|CG6020|CG7766|CG8475|CG9140|Eno|Gapdh1|GlyP|ND75|Pfk|Pgi|Pgk|PhKgamma|SdhA|SdhB|l(1)G0334
Mfuzz Cluster22	biological_process	glucan metabolic process(GO:0044042)	4	8	9	50	88.8889	7.72936	0	0.0150068	CG7766|CG8475|GlyP|PhKgamma
Mfuzz Cluster22	molecular_function	hydrolase activity, acting on acid anhydrides, catalyzing transmembrane movement of substances(GO:0016820)	13	134	139	9.70149	96.4029	4.51195	0	0.0150068	ABCB7|ATPsyn-gamma|Atpalpha|CG10226|CG11897|CG1824|CG31689|CG9281|Ca-P60A|Hmt-1|Mdr65|VhaM9.7-c|blw
Mfuzz Cluster22	UserSuppliedAssociations	IFM72vs30h_log2FC>2	198	1537	1537	12.8822	100	23.7314	0	0.000621053	ABCB7|AQP|ATPsyn-gamma|Ac76E|Ace|Acon|Acsl|Act88F|Actn|Ald|Atpalpha|CG10031|CG10068|CG10186|CG10340|CG10561|CG11099|CG11236|CG11474|CG11784|CG11876|CG12091|CG12162|CG12239|CG12484|CG13565|CG14141|CG14168|CG14290|CG1443|CG15546|CG16986|CG17572|CG17841|CG1824|CG1970|CG2121|CG2930|CG31221|CG31522|CG31676|CG32649|CG3362|CG34034|CG34134|CG34446|CG3476|CG40485|CG4169|CG4213|CG42269|CG42337|CG4297|CG430…
Mfuzz Cluster22	molecular_function	intramolecular oxidoreductase activity, interconverting aldoses and ketoses(GO:0016861)	3	8	8	37.5	100	5.67162	0.0004	0.0249408	CG8613|Pgi|Tpi
Mfuzz Cluster22	molecular_function	isocitrate dehydrogenase (NAD+) activity(GO:0004449)	3	6	6	50	100	6.69315	0.0002	0.0150068	CG5028|CG6439|l(1)G0156
Mfuzz Cluster22	biological_process	larval behavior(GO:0030537)	4	32	34	12.5	94.1176	3.11604	0.0058	0.191616	Gad1|NPFR1|Sh|shi
Mfuzz Cluster22	cellular_component	lipid particle(GO:0005811)	19	240	250	7.91667	96	4.44275	0	0.0150068	ATPsyn-gamma|Acon|Acsl|CG11876|CG4169|CG4769|CG5214|CG5261|CG7430|Ca-P60A|Cpr|Eno|Gapdh1|Gpo-1|Mdh2|Pgi|blw|l(1)G0156|sesB
Mfuzz Cluster22	molecular_function	lyase activity(GO:0016829)	9	125	136	7.2	91.9118	2.71841	0.0058	0.191616	Ac76E|Acon|Ald|CG7979|Eno|Gad1|Gycalpha99B|Pal2|l(1)G0255
Mfuzz Cluster22	molecular_function	magnesium ion binding(GO:0000287)	5	45	47	11.1111	95.7447	3.15431	0.0052	0.178453	CG3362|CG5028|CG6439|Eno|l(1)G0156
Mfuzz Cluster22	cellular_component	membrane part(GO:0044425)	68	1373	1603	4.95266	85.6519	4.42373	0	0.0150068	ABCB7|AP-50|ATPsyn-gamma|Ace|Atpalpha|Bap|CG10226|CG1161|CG11897|CG12121|CG14606|CG14767|CG14856|CG17841|CG1824|CG18809|CG1970|CG31522|CG31689|CG4169|CG42269|CG43066|CG4769|CG5037|CG5549|CG6020|CG6126|CG6455|CG7530|CG7582|CG8925|CG9140|CG9240|CG9281|Ca-P60A|Dh44-R1|Hk|Hmt-1|Ir7g|KCNQ|MFS10|Marf|Mdr65|Mer|Mvl|ND75|NPFR1|Nep3|Nhe3|Or71a|Proc-R|SdhA|SdhB|Sh|Treh|Tsp42Eh|VhaM9.7-c|Vps26|att-ORFA|blw|…
Mfuzz Cluster22	biological_process	mesoderm development(GO:0007498)	8	73	75	10.9589	97.3333	3.94728	0.0004	0.0249408	Ald|CG43897|Mlc1|Zasp66|csw|fog|nimB2|up
Mfuzz Cluster22	molecular_function	metal cluster binding(GO:0051540)	6	42	48	14.2857	87.5	4.24637	0.0002	0.0150068	Acon|CG9140|CG9836|ND75|SdhB|pix
Mfuzz Cluster22	molecular_function	microfilament motor activity(GO:0000146)	3	3	3	100	100	9.7712	0	0.0150068	Mhc|Mlc1|Mlc2
Mfuzz Cluster22	molecular_function	microtubule motor activity(GO:0003777)	5	51	57	9.80392	89.4737	2.81454	0.0092	0.261919	Klp68D|ctp|shi|spn-F|sw
Mfuzz Cluster22	cellular_component	mitochondrial envelope(GO:0005740)	5	48	56	10.4167	85.7143	2.97767	0.0072	0.219823	CG3476|CG9240|Marf|att-ORFA|sesB
Mfuzz Cluster22	cellular_component	mitochondrial matrix(GO:0005759)	5	53	57	9.43396	92.9825	2.71237	0.0102	0.282221	CG5028|Mdh2|kdn|l(1)G0156|slgA
Mfuzz Cluster22	cellular_component	mitochondrial membrane(GO:0031966)	10	79	88	12.6582	89.7727	4.98975	0	0.0150068	ABCB7|CG1824|CG3476|CG5037|CG6455|Gpo-1|Hmt-1|Marf|att-ORFA|sesB
Mfuzz Cluster22	biological_process	mitochondrion organization(GO:0007005)	4	48	57	8.33333	84.2105	2.13591	0.0412	0.591223	Marf|Pink1|milt|up
Mfuzz Cluster22	cellular_component	mitochondrion(GO:0005739)	25	254	269	9.84252	94.4238	6.38263	0	0.0150068	Acon|Alr|CG10340|CG11876|CG1970|CG32649|CG4169|CG4538|CG5028|CG6439|CG6455|Gpo-1|Mdh2|Mer|ND75|Pink1|SdhA|blw|kdn|l(1)G0156|l(1)G0255|l(1)G0334|milt|pix|slgA
Mfuzz Cluster22	UserSuppliedAssociations	MitoExplorer_all genes	70	1002	1065	6.98603	94.0845	7.29405	0	0.000621053	ABCB7|ATPsyn-gamma|Acon|Acsl|Ald|Alr|CG10340|CG11876|CG12091|CG14290|CG16986|CG1824|CG18809|CG1970|CG32649|CG3476|CG4169|CG4538|CG4769|CG5028|CG5037|CG5214|CG5261|CG5903|CG6020|CG6439|CG6455|CG7430|CG8206|CG8931|CG9140|CG9231|CG9240|CG9281|CG9410|CG9836|Dpck|Eno|Gapdh1|Gpo-1|Hmt-1|Marf|Mdh2|ND75|Nc73EF|Pfk|Pgi|Pgk|Pink1|Scsalpha|SdhA|SdhB|Tango11|Tpi|att-ORFA|blw|c12.2|ctp|kdn|l(1)G0156|l(1)G0255…
Mfuzz Cluster22	UserSuppliedAssociations	MitoExplorer_Electron_Transport_Chain	16	186	192	8.60215	96.875	4.27424	0	0.000621053	ATPsyn-gamma|CG10340|CG18809|CG1970|CG32649|CG4169|CG4769|CG5037|CG6020|CG9140|CG9410|Gpo-1|ND75|SdhA|SdhB|blw
Mfuzz Cluster22	UserSuppliedAssociations	MitoExplorer_Glycolysis	7	33	33	21.2121	100	5.92934	0.0002	0.000621053	Ald|Eno|Gapdh1|Pfk|Pgi|Pgk|Tpi
Mfuzz Cluster22	UserSuppliedAssociations	MitoExplorer_Import_&_Sorting	6	67	74	8.95522	90.5405	2.71485	0.0106	0.0271913	ABCB7|CG1824|CG8206|CG9240|CG9281|Hmt-1
Mfuzz Cluster22	UserSuppliedAssociations	MitoExplorer_Mitochondrial_Dynamics	10	42	43	23.8095	97.6744	7.65564	0	0.000621053	CG5903|CG6455|CG8931|Marf|Pink1|Tango11|l(3)03670|milt|sesB|shi
Mfuzz Cluster22	UserSuppliedAssociations	MitoExplorer_Pyruvate_Metabolism	4	21	24	19.0476	87.5	4.16001	0.001	0.00280952	CG11876|CG14290|CG5261|l(1)G0334
Mfuzz Cluster22	UserSuppliedAssociations	MitoExplorer_TCA_Cycle	13	28	29	46.4286	96.5517	13.0905	0	0.000621053	Acon|CG12091|CG5028|CG5214|CG6439|CG7430|Mdh2|Nc73EF|Scsalpha|kdn|l(1)G0156|l(1)G0255|skap
Mfuzz Cluster22	biological_process	monosaccharide metabolic process(GO:0005996)	6	36	39	16.6667	92.3077	4.76281	0.0004	0.0249408	CG8613|Gapdh1|Pfrx|Pgi|PhKgamma|oxt
Mfuzz Cluster22	biological_process	monovalent inorganic cation transport(GO:0015672)	9	139	163	6.47482	85.2761	2.36773	0.0088	0.254625	ATPsyn-gamma|Atpalpha|CG3476|Hk|KCNQ|Nhe3|Sh|VhaM9.7-c|blw
Mfuzz Cluster22	biological_process	muscle cell cellular homeostasis(GO:0046716)	3	9	9	33.3333	100	5.2884	0.0006	0.0338369	sesB|up|wupA
Mfuzz Cluster22	biological_process	myofibril assembly(GO:0030239)	4	7	8	57.1429	87.5	8.32964	0	0.0150068	Act88F|Mhc|up|wupA
Mfuzz Cluster22	molecular_function	NAD binding(GO:0051287)	6	37	40	16.2162	92.5	4.66905	0.0004	0.0249408	CG1970|CG5028|CG6439|CG9140|Gapdh1|l(1)G0156
Mfuzz Cluster22	biological_process	negative regulation of catalytic activity(GO:0043086)	4	26	31	15.3846	83.871	3.66476	0.0042	0.149947	CG10186|Iap2|PTP-ER|ics
Mfuzz Cluster22	biological_process	neurotransmitter metabolic process(GO:0042133)	3	6	6	50	100	6.69315	0.0004	0.0249408	Ace|Cha|Gad1
Mfuzz Cluster22	biological_process	neurotransmitter transport(GO:0006836)	9	104	120	8.65385	86.6667	3.34404	0.0008	0.0429285	AP-50|Bap|CG43066|CG5549|Rop|Snap25|cpx|endoA|tomosyn
Mfuzz Cluster22	molecular_function	neurotransmitter transporter activity(GO:0005326)	3	24	27	12.5	88.8889	2.69748	0.0248	0.462376	CG43066|CG5549|cpx
Mfuzz Cluster22	biological_process	nitrogen compound transport(GO:0071705)	8	121	127	6.61157	95.2756	2.29514	0.0112	0.293387	ABCB7|AP-50|CG2930|CG3476|CG9413|Hmt-1|sesB|tadr
Mfuzz Cluster22	biological_process	nucleoside metabolic process(GO:0009116)	11	130	139	8.46154	93.5252	3.61527	0.0006	0.0338369	ATPsyn-gamma|Atpalpha|CG4769|CG4802|CG6364|CG8360|CG8641|Ca-P60A|Dpck|Marf|blw
Mfuzz Cluster22	biological_process	organic anion transport(GO:0015711)	5	70	77	7.14286	90.9091	2.0007	0.0336	0.513807	CG3476|CG9413|Oatp58Db|sesB|tadr
Mfuzz Cluster22	molecular_function	oxidoreductase activity, acting on NAD(P)H(GO:0016651)	6	49	52	12.2449	94.2308	3.75505	0.002	0.0859612	CG1970|CG6020|CG7430|CG9140|Cpr|ND75
Mfuzz Cluster22	molecular_function	oxidoreductase activity, acting on the aldehyde or oxo group of donors, disulfide as acceptor(GO:0016624)	3	7	8	42.8571	87.5	6.12994	0.0004	0.0249408	CG11876|Nc73EF|l(1)G0334
Mfuzz Cluster22	biological_process	peptidyl-tyrosine dephosphorylation(GO:0035335)	6	41	46	14.6341	89.1304	4.32537	0.0004	0.0249408	CG3632|CG7378|IA-2|PTP-ER|csw|l(1)G0232
Mfuzz Cluster22	cellular_component	phosphorylase kinase complex(GO:0005964)	3	3	3	100	100	9.7712	0	0.0150068	CG7766|CG8475|PhKgamma
Mfuzz Cluster22	biological_process	phosphorylation(GO:0016310)	16	316	333	5.06329	94.8949	2.11907	0.043	0.609155	5PtaseI|CG4769|CG4802|CG9784|CkIalpha|Dgkepsilon|Pdk1|PhKgamma|Pink1|SNF4Agamma|Wnk|csw|ird1|kay|sev|trc
Mfuzz Cluster22	molecular_function	protein homodimerization activity(GO:0042803)	5	66	68	7.57576	97.0588	2.14759	0.0266	0.462376	Ace|GlyP|Mhc|Xbp1|ctp
Mfuzz Cluster22	molecular_function	protein kinase regulator activity(GO:0019887)	4	41	57	9.7561	71.9298	2.50444	0.02	0.440498	CG6191|CG7766|CG8475|CycG
Mfuzz Cluster22	molecular_function	protein tyrosine phosphatase activity(GO:0004725)	6	37	42	16.2162	88.0952	4.66905	0.0002	0.0150068	CG3632|CG7378|IA-2|PTP-ER|csw|l(1)G0232
Mfuzz Cluster22	cellular_component	pyruvate dehydrogenase complex(GO:0045254)	3	4	4	75	100	8.37388	0	0.0150068	CG11876|CG5261|l(1)G0334
Mfuzz Cluster22	biological_process	pyruvate metabolic process(GO:0006090)	9	34	35	26.4706	97.1429	7.95967	0	0.0150068	Ald|CG11876|CG5261|Eno|Gapdh1|Pfk|Pgi|Pgk|l(1)G0334
Mfuzz Cluster22	biological_process	R7 cell fate commitment(GO:0007465)	3	13	13	23.0769	100	4.20431	0.0044	0.15583	PTP-ER|csw|sev
Mfuzz Cluster22	biological_process	regulation of apoptotic process(GO:0042981)	6	87	94	6.89655	92.5532	2.09813	0.0282	0.462376	Den1|Iap2|Mdh2|Mer|Pink1|pix
Mfuzz Cluster22	biological_process	regulation of membrane potential(GO:0042391)	3	19	23	15.7895	82.6087	3.23448	0.0122	0.311293	Ca-P60A|Sh|sesB
Mfuzz Cluster22	biological_process	regulation of peptidase activity(GO:0052547)	3	30	36	10	83.3333	2.21895	0.0404	0.581629	CG10186|Iap2|Mdh2
Mfuzz Cluster22	biological_process	regulation of short-term neuronal synaptic plasticity(GO:0048172)	3	5	5	60	100	7.4109	0.0006	0.0338369	Sap47|Snap25|shi
Mfuzz Cluster22	biological_process	response to acid chemical(GO:0001101)	3	22	25	13.6364	88	2.89282	0.0196	0.433846	Ace|CG10226|Mdr65
Mfuzz Cluster22	biological_process	response to mechanical stimulus(GO:0009612)	4	16	18	25	88.8889	5.11285	0.0008	0.0429285	Atpalpha|Gad1|Tpi|sesB
Mfuzz Cluster22	biological_process	response to nitrogen compound(GO:1901698)	4	31	35	12.9032	88.5714	3.19763	0.009	0.257052	Ace|CG10226|Ela|Mdr65
Mfuzz Cluster22	biological_process	ribonucleoside triphosphate biosynthetic process(GO:0009201)	5	32	36	15.625	88.8889	4.14615	0.0008	0.0429285	ATPsyn-gamma|Atpalpha|CG6364|Ca-P60A|blw
Mfuzz Cluster22	UserSuppliedAssociations	RNAi phenotype in muscle (Schnorrer et al 2010)	87	2028	2121	4.28994	95.6153	3.2514	0.0438	0.105728	AP-50|ATPsyn-gamma|Acon|Acsl|Act88F|Actn|Ald|Atpalpha|Bap|CG1161|CG12091|CG14141|CG1970|CG32649|CG34408|CG40485|CG4169|CG4213|CG42269|CG43897|CG4769|CG4802|CG5214|CG6020|CG6191|CG6364|CG7430|CG8547|CG8768|CG9140|CG9335|CG9657|CG9813|CG9836|Ca-P60A|Cbp53E|CkIalpha|CycG|FBgn0265262|FBgn0265356|FBgn0265595|FBgn0265998|FBgn0266711|FBgn0267336|KCNQ|Klp68D|Marf|Mf|Mhc|Mlc1|Mo25|Nc73EF|Pfrx|Pgk|Pink1|Pp…
Mfuzz Cluster22	UserSuppliedAssociations	Salm core 133 genes (Spletter et al, 2015)	29	131	133	22.1374	98.4962	12.4835	0	0.000621053	ATPsyn-gamma|Acon|Act88F|CG14168|CG42337|CG4769|CG5028|CG5214|CG5261|CG6439|CG6455|CG7430|FBgn0265045|FBgn0266377|GlyP|Gpo-1|GstS1|Nc73EF|Pex1|Pfk|Scsalpha|SdhA|blw|cue|l(1)G0156|l(1)G0255|sesB|skap|wgn
Mfuzz Cluster22	UserSuppliedAssociations	Salm core genes (Spletter et al 2015)	74	710	742	10.4225	95.6873	11.4717	0	0.000621053	ATPsyn-gamma|Acon|Act88F|CG10186|CG10565|CG1161|CG14168|CG2469|CG3308|CG42271|CG42337|CG43897|CG4769|CG5028|CG5214|CG5261|CG5604|CG6439|CG6455|CG7378|CG7414|CG7430|CG7766|CG7852|CG8547|CG9413|CG9836|CycG|Dgkepsilon|FBgn0265045|FBgn0265052|FBgn0265356|FBgn0265991|FBgn0265998|FBgn0266377|FBgn0266711|FBgn0267336|FBgn0267350|GlyP|Gpo-1|GstS1|HDAC4|Hk|KCNQ|Lmpt|Mhc|Nc73EF|Pdk1|Pex1|Pfk|Pfrx|PhKgamma|S…
Mfuzz Cluster22	biological_process	sarcomere organization(GO:0045214)	3	20	21	15	95.2381	3.11306	0.015	0.362869	Actn|up|wupA
Mfuzz Cluster22	UserSuppliedAssociations	sarcomeric_proteins	18	76	77	23.6842	98.7013	10.254	0	0.000631579	Act88F|Actn|CG14168|Ca-P60A|FBgn0265045|FBgn0265356|FBgn0265991|Lmpt|Mf|Mhc|Mlc1|Mlc2|Mp20|Tm1|Tm2|TpnC25D|Zasp66|up
Mfuzz Cluster22	biological_process	single-organism carbohydrate catabolic process(GO:0044724)	9	29	30	31.0345	96.6667	8.78124	0	0.0150068	Ald|Eno|Gapdh1|GlyP|Pfk|Pgi|Pgk|PhKgamma|l(1)G0334
Mfuzz Cluster22	biological_process	small molecule catabolic process(GO:0044282)	5	56	60	8.92857	93.3333	2.56785	0.0148	0.359998	5PtaseI|Ace|CG7430|Gad1|slgA
Mfuzz Cluster22	biological_process	sperm individualization(GO:0007291)	4	41	45	9.7561	91.1111	2.50444	0.0244	0.462376	Mer|ctp|shi|sw
Mfuzz Cluster22	biological_process	striated muscle contraction(GO:0006941)	3	4	4	75	100	8.37388	0	0.0150068	CG2121|KCNQ|Mhc
Mfuzz Cluster22	molecular_function	substrate-specific transmembrane transporter activity(GO:0022891)	33	566	666	5.83039	84.985	3.96665	0	0.0150068	AQP|ATPsyn-gamma|Atpalpha|CG14606|CG14767|CG14856|CG18809|CG2930|CG3476|CG4169|CG42269|CG43066|CG5549|CG6126|CG6293|CG8925|CG9413|CG9657|Ca-P60A|Hk|Ir7g|KCNQ|MFS10|Mvl|Nhe3|Oatp58Db|Sh|VhaM9.7-c|blw|galectin|hoe2|sesB|tadr
Mfuzz Cluster22	molecular_function	succinate-CoA ligase activity(GO:0004774)	3	6	6	50	100	6.69315	0	0.0150068	Scsalpha|SdhA|skap
Mfuzz Cluster22	cellular_component	synapse(GO:0045202)	7	56	57	12.5	98.2456	4.12711	0.0004	0.0249408	Ace|Pdk1|Sap47|Snap25|shi|stmA|tomosyn
Mfuzz Cluster22	biological_process	synaptic growth at neuromuscular junction(GO:0051124)	5	24	24	20.8333	100	5.07546	0.0004	0.0249408	Atpalpha|Pdk1|cpx|kay|sesB
Mfuzz Cluster22	biological_process	synaptic transmission(GO:0007268)	11	84	88	13.0952	95.4545	5.38054	0	0.0150068	Ace|Acsl|Atpalpha|Ca-P60A|Cha|Pgk|Rop|Sap47|Snap25|sesB|stmA
Mfuzz Cluster22	biological_process	synaptic vesicle priming(GO:0016082)	3	12	14	25	85.7143	4.42697	0.0018	0.078897	Rop|Snap25|tomosyn
Mfuzz Cluster22	molecular_function	syntaxin binding(GO:0019905)	3	3	3	100	100	9.7712	0	0.0150068	Rop|cpx|tomosyn
Mfuzz Cluster22	biological_process	transmembrane transport(GO:0055085)	26	426	473	6.10329	90.0634	3.75089	0	0.0150068	ABCB7|ATPsyn-gamma|CG10226|CG11897|CG14606|CG14856|CG1824|CG3476|CG42269|CG6126|CG6293|CG8925|CG9413|CG9657|Hmt-1|KCNQ|MFS10|Mdr65|Mvl|Nhe3|Sh|VhaM9.7-c|att-ORFA|blw|hoe2|tadr
Mfuzz Cluster22	cellular_component	tricarboxylic acid cycle enzyme complex(GO:0045239)	6	13	14	46.1538	92.8571	9.04819	0	0.0150068	CG5214|CG7430|Nc73EF|Scsalpha|l(1)G0255|skap
Mfuzz Cluster22	biological_process	tricarboxylic acid cycle(GO:0006099)	14	38	41	36.8421	92.6829	12.1433	0	0.0150068	Acon|CG5028|CG5214|CG6439|CG7430|Mdh2|Nc73EF|Scsalpha|SdhA|SdhB|kdn|l(1)G0156|l(1)G0255|skap
Mfuzz Cluster22	UserSuppliedAssociations	WTvssalm_24hAPF_log2FC>2	13	49	49	26.5306	100	9.36249	0	0.000621053	Act88F|CG14168|CG43078|CG7378|FBgn0265991|Gpo-1|Mhc|Mlc1|Mlc2|Tm2|Tsp42Eh|up|wupA
Mfuzz Cluster22	UserSuppliedAssociations	WTvssalm_30hAPF_log2FC>2	52	398	398	13.0653	100	11.517	0	0.000621053	AQP|ATPsyn-gamma|Acon|Act88F|Ald|CG10340|CG11876|CG14168|CG1824|CG32649|CG4169|CG43078|CG43897|CG4769|CG5028|CG5214|CG5903|CG6020|CG7378|CG9140|FBgn0265356|FBgn0265380|FBgn0265991|Gapdh1|Gpo-1|Lmpt|Mdh2|Mhc|Mlc1|Mlc2|ND75|Nc73EF|Pex1|Pgk|Scsalpha|SdhA|SdhB|Tm2|Tpi|Treh|blw|cue|kdn|l(1)G0156|l(1)G0255|l(1)G0334|l(3)02640|l(3)03670|mRpL28|tadr|up|wupA
Mfuzz Cluster22	UserSuppliedAssociations	WTvssalm_72hAPF_log2FC>2	95	449	449	21.1581	100	22.296	0	0.000621053	AQP|ATPsyn-gamma|Acon|Acsl|Act88F|Actn|Ald|CG10340|CG10561|CG11099|CG11412|CG11876|CG12091|CG12162|CG14168|CG14290|CG1824|CG18809|CG1970|CG32649|CG4169|CG42337|CG43078|CG4769|CG5028|CG5037|CG5214|CG5261|CG5903|CG5961|CG6020|CG6293|CG6439|CG6455|CG7430|CG7766|CG8206|CG8475|CG8768|CG9140|CG9231|CG9240|CG9836|Dot|Eno|FBgn0265045|FBgn0265356|FBgn0265380|FBgn0265991|FBgn0265998|FBgn0266377|FBgn0266967…
Mfuzz Cluster22	UserSuppliedAssociations	WTvssalm_99hAPF_log2FC>2	64	448	448	14.2857	100	13.763	0	0.000621053	ATPsyn-gamma|Acon|Act88F|Ald|CG10340|CG11784|CG11876|CG14168|CG17572|CG1824|CG2121|CG34034|CG34134|CG4169|CG42337|CG4769|CG5028|CG5214|CG5261|CG6020|CG6293|CG6439|CG6455|CG7430|CG9140|CG9240|Cyp4aa1|Eno|FBgn0265045|FBgn0265991|FBgn0266377|FBgn0266967|Gapdh1|GlyP|Gpo-1|GstS1|Ir7g|Mdh2|Mlc2|ND75|Nc73EF|Pex1|Pfk|Pgi|Pgk|Scsalpha|SdhA|SdhB|Sh|Tpi|UGP|blw|cue|kdn|l(1)G0156|l(1)G0255|l(1)G0334|l(3)0367…
Mfuzz Cluster23	molecular_function	3'-5' DNA helicase activity(GO:0043138)	6	14	14	42.8571	100	9.22664	0	0.00769913	Mcm2|Mcm5|Mcm6|Mcm7|RecQ4|dpa
Mfuzz Cluster23	cellular_component	actin filament(GO:0005884)	3	20	21	15	95.2381	3.37383	0.0098	0.215308	Act42A|Act5C|Bap55
Mfuzz Cluster23	biological_process	actomyosin contractile ring organization(GO:0044837)	3	14	16	21.4286	87.5	4.29992	0.0054	0.135444	Det|pav|sti
Mfuzz Cluster23	biological_process	ameboidal-type cell migration(GO:0001667)	7	110	117	6.36364	94.0171	2.35552	0.0186	0.340257	Crk|Ras85D|Sdc|bsk|par-6|pyr|sl
Mfuzz Cluster23	molecular_function	ATP binding(GO:0005524)	38	655	692	5.80153	94.6532	4.99969	0	0.00769913	Act42A|Act5C|Btk29A|CG2990|CG3326|CG5757|CG8173|Cap|Cdc6|DNA-ligI|Eph|Klp61F|Mcm2|Mcm5|Mcm6|Mcm7|Orc1|Pak3|Rad51C|RecQ4|RfC4|RnrL|SMC1|SMC2|Top2|bsk|cdc2|cdc2rk|cutlet|dpa|glu|ial|ncd|nmo|otk|pav|rad50|sti
Mfuzz Cluster23	cellular_component	cell cortex part(GO:0044448)	7	46	55	15.2174	83.6364	5.21411	0	0.00769913	Orc6|Sep1|par-6|pon|scra|sti|tum
Mfuzz Cluster23	biological_process	cell cycle process(GO:0022402)	62	549	577	11.2933	95.1473	12.6795	0	0.00769913	14-3-3epsilon|Act42A|Act5C|Bap55|Btk29A|CAP-D2|CG3326|CG8188|CSN8|Caf1|Cap|Cks30A|Cnb|Cwc25|CycC|Det|Dref|FANCI|Klp61F|Mcm5|Mcm7|Ndc80|Orc2|Orc5|Orc6|Ras85D|RecQ4|RfC4|RpA-70|SMC1|SMC2|Sas-4|Sep1|Spc25|Sse|Top2|bif|cdc2|cid|dap|dgt4|dgt5|dgt6|dmt|dpa|dup|feo|glu|ial|mop|msd5|mus209|ncd|pav|rod|scra|slx1|spd-2|stg|sti|tum|wdb
Mfuzz Cluster23	biological_process	cell cycle(GO:0007049)	9	105	107	8.57143	98.1308	3.6973	0.0006	0.020915	CG10336|Cks30A|DNApol-epsilon|Dp|Klp61F|Sep1|Slbp|cdc2|stg
Mfuzz Cluster23	biological_process	cell proliferation(GO:0008283)	11	129	134	8.52713	96.2687	4.07201	0.0002	0.00769913	Mcm2|Orc1|Orc2|Ras85D|Su(z)12|ac|cutlet|gcm|hd|stg|tum
Mfuzz Cluster23	biological_process	cell redox homeostasis(GO:0045454)	5	48	51	10.4167	94.1176	3.27954	0.008	0.18494	BthD|CG17843|CG7484|CG9302|Prx6005
Mfuzz Cluster23	cellular_component	cell(GO:0005623)	3	5	5	60	100	7.86584	0.0002	0.00769913	Act5C|pav|tum
Mfuzz Cluster23	biological_process	cellular response to DNA damage stimulus(GO:0006974)	34	232	246	14.6552	94.3089	11.2888	0	0.00769913	14-3-3epsilon|CG10336|CSN8|Caf1|Caf1-180|Chrac-14|CycC|DNA-ligI|DNApol-delta|DNApol-epsilon|DNApol-eta|Dp|FANCI|His2Av|Hus1-like|Mcm7|Mes4|Pole2|Rad51C|Rad9|RecQ4|RfC4|RpA-70|Rrp1|SMC1|SMC2|Top2|W|cdc2|glu|mus209|rad50|slx1|tos
Mfuzz Cluster23	biological_process	centriole assembly(GO:0098534)	3	20	21	15	95.2381	3.37383	0.0148	0.292498	Cnb|Sas-4|stg
Mfuzz Cluster23	cellular_component	centriole(GO:0005814)	3	20	20	15	100	3.37383	0.015	0.295133	Cnb|Sas-4|spd-2
Mfuzz Cluster23	biological_process	centrosome organization(GO:0051297)	11	115	122	9.56522	94.2623	4.52951	0	0.00769913	Cnb|Klp61F|Sas-4|dup|feo|ncd|pav|scra|spd-2|stg|tum
Mfuzz Cluster23	cellular_component	centrosome(GO:0005813)	6	59	59	10.1695	100	3.52104	0.0038	0.102265	CG3326|Klp61F|Map60|feo|pav|spd-2
Mfuzz Cluster23	biological_process	chromatin assembly or disassembly(GO:0006333)	5	20	128	25	15.625	6.12265	0	0.00769913	Caf1|Caf1-105|His2Av|asf1|cid
Mfuzz Cluster23	molecular_function	chromatin binding(GO:0003682)	11	100	105	11	95.2381	5.10605	0	0.00769913	Caf1|DMAP1|Mcm2|Mcm5|Mcm6|Mcm7|Orc2|Sfmbt|Su(var)3-7|Su(z)12|msl-1
Mfuzz Cluster23	biological_process	chromatin silencing(GO:0006342)	8	39	41	20.5128	95.122	6.83393	0	0.00769913	Caf1|Orc1|Orc2|Orc5|Orc6|Rpd3|Sfmbt|Top2
Mfuzz Cluster23	cellular_component	chromosomal part(GO:0044427)	42	246	369	17.0732	66.6667	13.9908	0	0.00769913	Act5C|CAP-D2|Caf1|Cap|DNApol-alpha180|DNApol-alpha60|DNApol-alpha73|DNApol-delta|DNApol-epsilon|Dp|HipHop|His2Av|HmgD|Jarid2|Mes4|Ndc80|Orc1|Orc2|Orc5|Orc6|Pole2|RPA2|RfC38|RfC4|RpA-70|Rpd3|SMC1|SMC2|Spc25|Spindly|Su(var)3-7|Su(z)12|cid|dmt|dup|glu|ial|lin-52|mip120|msl-1|rod|slx1
Mfuzz Cluster23	cellular_component	chromosome(GO:0005694)	18	116	123	15.5172	94.3089	8.50879	0	0.00769913	14-3-3epsilon|CG3326|Caf1|Cap|D12|Fcp1|His2Av|Rpd3|SMC1|SMC2|Top2|bab2|glu|lin-52|mip120|msl-1|polybromo|stg
Mfuzz Cluster23	molecular_function	cyclin-dependent protein kinase activity(GO:0097472)	3	16	16	18.75	100	3.93884	0.007	0.166161	Cks30A|cdc2|cdc2rk
Mfuzz Cluster23	molecular_function	cyclin-dependent protein serine/threonine kinase regulator activity(GO:0016538)	3	18	19	16.6667	94.7368	3.63496	0.0086	0.197265	Cks30A|CycC|dap
Mfuzz Cluster23	biological_process	developmental process(GO:0032502)	117	2269	2400	5.15646	94.5417	8.0869	0	0.00769913	14-3-3epsilon|Act5C|Arf79F|Bap55|BthD|Btk29A|CG11399|CG31961|CG3638|CG5857|CG7735|CG8188|CG8247|CSN8|Caf1|Cap|Cks30A|Crk|CycC|DNApol-alpha180|DNApol-alpha60|DNApol-delta|DNApol-epsilon|Det|Dip3|Dp|Dref|Eph|Fcp1|HSPC300|HipHop|HmgD|Ice|Klp61F|MAGE|Mcm2|Mcm6|Mitf|Ndc80|O-fut1|Orc1|Orc2|RPA2|Ras85D|RecQ4|RfC38|RfC4|RnrS|Rpd3|SMC1|SMC2|Sas-4|Sep1|Sfmbt|Spn27A|Sse|Su(z)12|Ten-m|Ts|TwdlX|Vml|W|Wnt10|ac…
Mfuzz Cluster23	biological_process	DNA amplification(GO:0006277)	10	21	21	47.619	100	12.6456	0	0.00769913	Caf1|Dp|Mcm6|Orc1|Orc2|RecQ4|dup|hd|mip120|mus209
Mfuzz Cluster23	molecular_function	DNA binding(GO:0003677)	63	700	846	9	82.7423	10.5698	0	0.00769913	CG18599|CG2990|CG6241|CG9705|Caf1-105|Cdc6|Chrac-14|D1|DMAP1|DNA-ligI|DNApol-alpha180|DNApol-alpha73|DNApol-delta|DNApol-epsilon|DNApol-eta|Dip3|Dp|Dref|His2Av|HmgD|Jarid2|Mcm2|Mcm5|Mcm6|Mcm7|Mes4|Orc1|Orc2|Orc5|Orc6|Pole2|RPA2|Rad51C|RfC38|RfC4|RpA-70|Rrp1|SMC1|SMC2|Su(var)3-7|Top2|ac|bab2|cid|cutlet|danr|dpa|dup|fd96Cb|gcm|glu|gsb|her|mip120|msl-1|mus209|ncm|polybromo|sc|tos|unk|vri|zfh2
Mfuzz Cluster23	cellular_component	DNA packaging complex(GO:0044815)	5	16	126	31.25	12.6984	7.0115	0	0.00769913	CAP-D2|His2Av|SMC2|cid|glu
Mfuzz Cluster23	biological_process	DNA recombination(GO:0006310)	10	47	49	21.2766	95.9184	7.82748	0	0.00769913	Caf1-180|DNA-ligI|DNApol-eta|Rad51C|RecQ4|SMC1|SMC2|Top2|glu|rad50
Mfuzz Cluster23	biological_process	DNA replication initiation(GO:0006270)	9	12	13	75	92.3077	15.3826	0	0.00769913	Mcm2|Mcm5|Mcm6|Mcm7|Orc1|Orc2|Orc5|Orc6|dpa
Mfuzz Cluster23	biological_process	DNA replication(GO:0006260)	30	67	71	44.7761	94.3662	21.2061	0	0.00769913	Btk29A|CG2990|DNA-ligI|DNApol-alpha180|DNApol-alpha60|DNApol-alpha73|DNApol-delta|DNApol-epsilon|Dref|Mcm2|Mcm5|Mcm6|Mcm7|Mes4|Orc1|Orc2|Orc5|Orc6|Pole2|RPA2|RecQ4|RfC38|RfC4|RnrL|RnrS|RpA-70|cutlet|dpa|dup|mus209
Mfuzz Cluster23	biological_process	DNA strand elongation(GO:0022616)	4	5	5	80	100	10.6126	0	0.00769913	DNApol-alpha180|DNApol-delta|RfC4|mus209
Mfuzz Cluster23	molecular_function	DNA-dependent ATPase activity(GO:0008094)	7	35	35	20	100	6.28607	0	0.00769913	CG2990|Cdc6|Rad51C|RecQ4|RfC38|RfC4|Top2
Mfuzz Cluster23	molecular_function	DNA-directed DNA polymerase activity(GO:0003887)	8	18	19	44.4444	94.7368	10.878	0	0.00769913	DNApol-alpha180|DNApol-alpha60|DNApol-alpha73|DNApol-delta|DNApol-epsilon|DNApol-eta|Mes4|Pole2
Mfuzz Cluster23	biological_process	dosage compensation(GO:0007549)	3	13	13	23.0769	100	4.50847	0.0024	0.0694431	Su(var)3-7|msl-1|sc
Mfuzz Cluster23	molecular_function	endodeoxyribonuclease activity(GO:0004520)	3	21	21	14.2857	100	3.25612	0.0164	0.3116	CG2990|Rrp1|slx1
Mfuzz Cluster23	molecular_function	enzyme inhibitor activity(GO:0004857)	6	93	127	6.45161	73.2283	2.21634	0.027	0.387452	14-3-3epsilon|Mapmodulin|Spn27A|Spn28D|TepII|dap
Mfuzz Cluster23	cellular_component	ESC/E(Z) complex(GO:0035098)	3	7	7	42.8571	100	6.52193	0.0002	0.00769913	Caf1|Rpd3|Su(z)12
Mfuzz Cluster23	molecular_function	exodeoxyribonuclease activity(GO:0004529)	5	7	9	71.4286	77.7778	11.1653	0	0.00769913	DNApol-alpha180|DNApol-delta|DNApol-epsilon|Rrp1|tos
Mfuzz Cluster23	biological_process	extracellular structure organization(GO:0043062)	4	40	42	10	95.2381	2.83045	0.0164	0.3116	Btk29A|Vml|polybromo|scra
Mfuzz Cluster23	cellular_component	germline ring canal(GO:0045172)	4	18	18	22.2222	100	5.08357	0.0012	0.0383567	14-3-3epsilon|Btk29A|Sep1|scra
Mfuzz Cluster23	cellular_component	HAUS complex(GO:0070652)	4	8	8	50	100	8.21363	0	0.00769913	dgt4|dgt5|dgt6|msd5
Mfuzz Cluster23	biological_process	histone methylation(GO:0016571)	4	29	30	13.7931	96.6667	3.6648	0.003	0.0848626	Art1|Caf1|Su(z)12|ptip
Mfuzz Cluster23	molecular_function	histone methyltransferase activity(GO:0042054)	3	21	22	14.2857	95.4545	3.25612	0.015	0.295133	Art1|Caf1|Su(z)12
Mfuzz Cluster23	biological_process	immune system process(GO:0002376)	11	188	207	5.85106	90.8213	2.65599	0.008	0.18494	Eph|Spn27A|Sr-CIV|TepII|amn|bsk|dup|gcm|mop|mus209|ytr
Mfuzz Cluster23	cellular_component	intracellular(GO:0005622)	28	711	739	3.93812	96.2111	2.05888	0.041	0.515962	Arf79F|CG10083|CG13123|CG13893|CG15725|CG7735|CG8232|Chrac-14|Det|E(var)3-9|Gmd|Jarid2|Mes4|Nbr|RhoGAP1A|RhoGAP54D|Rrp1|Su(var)3-7|Su(z)12|cg|drm|her|pad|polybromo|ptip|tum|wech|zfh2
Mfuzz Cluster23	cellular_component	kinesin complex(GO:0005871)	3	29	30	10.3448	96.6667	2.5229	0.031	0.426202	Klp61F|ncd|pav
Mfuzz Cluster23	biological_process	lateral inhibition(GO:0046331)	10	193	207	5.18135	93.2367	2.11486	0.0184	0.337995	Cap|Det|Mcm2|Mcm6|O-fut1|Orc5|RfC4|mri|phyl|stg
Mfuzz Cluster23	biological_process	maintenance of protein location in cell(GO:0032507)	4	40	41	10	97.561	2.83045	0.016	0.30531	Act5C|ial|pav|tum
Mfuzz Cluster23	biological_process	metaphase plate congression(GO:0051310)	4	15	16	26.6667	93.75	5.6977	0.0002	0.00769913	Ndc80|Spc25|Top2|cid
Mfuzz Cluster23	molecular_function	microtubule binding(GO:0008017)	6	61	65	9.83607	93.8462	3.42019	0.0028	0.0802304	Girdin|Klp61F|Map60|Mapmodulin|bif|scra
Mfuzz Cluster23	molecular_function	microtubule motor activity(GO:0003777)	4	51	57	7.84314	89.4737	2.24956	0.0344	0.464295	Klp61F|cid|ncd|pav
Mfuzz Cluster23	UserSuppliedAssociations	microtubule_associated	33	512	519	6.44531	98.6513	6.99939	0	0.00295	14-3-3epsilon|Act42A|Act5C|CG3326|Cnb|DNApol-delta|Det|Klp61F|Map60|Mapmodulin|Mcm7|RfC38|RfC4|RpA-70|SMC2|Sas-4|Sep1|Spindly|cdc2|dgt4|dgt5|dgt6|feo|hrg|ial|msd5|mus209|ncd|par-6|pav|rod|spd-2|tum
Mfuzz Cluster23	cellular_component	microtubule(GO:0005874)	4	53	55	7.54717	96.3636	2.16082	0.0424	0.528746	Klp61F|Spindly|rod|tum
Mfuzz Cluster23	cellular_component	midbody(GO:0030496)	3	15	16	20	93.75	4.11107	0.0046	0.118397	ial|pav|tum
Mfuzz Cluster23	UserSuppliedAssociations	MitoExplorer_Nucleotide_Metabolism	3	12	13	25	92.3077	5.51316	0.0016	0.01888	CG5757|FBgn0266452|Ts
Mfuzz Cluster23	biological_process	mitotic cell cycle phase(GO:0098763)	5	31	33	16.129	93.9394	4.5893	0.0008	0.0265288	CG3326|DNApol-alpha60|Orc6|hd|stg
Mfuzz Cluster23	biological_process	mRNA 3'-end processing(GO:0031124)	3	30	30	10	100	2.45001	0.0402	0.512869	CG8232|Slbp|hrg
Mfuzz Cluster23	molecular_function	N-methyltransferase activity(GO:0008170)	3	30	33	10	90.9091	2.45001	0.0372	0.49233	Art1|Caf1|Su(z)12
Mfuzz Cluster23	biological_process	negative regulation of apoptotic process(GO:0043066)	4	40	44	10	90.9091	2.83045	0.0132	0.268673	Det|MAGE|Ras85D|sc
Mfuzz Cluster23	biological_process	negative regulation of cell cycle(GO:0045786)	12	102	106	11.7647	96.2264	5.63405	0	0.00769913	14-3-3epsilon|CSN8|CycC|FANCI|Mcm7|RecQ4|RpA-70|Top2|dap|rod|slx1|stg
Mfuzz Cluster23	biological_process	negative regulation of cell development(GO:0010721)	5	45	47	11.1111	95.7447	3.46161	0.0052	0.132301	Dip3|Ras85D|Rpd3|ana|bif
Mfuzz Cluster23	biological_process	negative regulation of cellular component organization(GO:0051129)	5	75	80	6.66667	93.75	2.10332	0.0376	0.494666	Klp61F|Rpd3|bif|feo|rod
Mfuzz Cluster23	biological_process	negative regulation of protein modification process(GO:0031400)	3	22	23	13.6364	95.6522	3.14568	0.0198	0.34996	bsk|dap|par-6
Mfuzz Cluster23	biological_process	nuclear division(GO:0000280)	13	157	166	8.28025	94.5783	4.3072	0.0004	0.0143385	Bap55|CAP-D2|Cks30A|Klp61F|Mcm5|Orc6|RfC4|SMC2|Sse|Top2|cdc2|cid|glu
Mfuzz Cluster23	cellular_component	nuclear pre-replicative complex(GO:0005656)	5	9	9	55.5556	100	9.73617	0	0.00769913	Cdc6|Mcm2|Mcm5|Mcm6|Mcm7
Mfuzz Cluster23	biological_process	nucleic acid phosphodiester bond hydrolysis(GO:0090305)	8	58	59	13.7931	98.3051	5.19038	0	0.00769913	CG13690|DNApol-alpha180|DNApol-delta|Nbr|Rrp1|rad50|slx1|tos
Mfuzz Cluster23	biological_process	nucleosome assembly(GO:0006334)	6	20	131	30	15.2672	7.49706	0	0.00769913	Caf1|Caf1-105|Caf1-180|His2Av|asf1|cid
Mfuzz Cluster23	cellular_component	nucleus(GO:0005634)	79	1254	1407	6.29984	89.1258	8.31025	0	0.00769913	14-3-3epsilon|CAP-D2|CG10336|CG11164|CG13123|CG18599|CG8289|Caf1|Caf1-180|Cdc6|CycC|D1|D12|DMAP1|DNApol-alpha180|DNApol-alpha60|DNApol-epsilon|Dip3|Dp|Dref|E(var)3-9|Fcp1|His2Av|Jarid2|Map60|Mapmodulin|Mcm2|Mcm6|Mcm7|Orc1|Orc2|Pole2|RfC4|Rox8|RpA-70|Rpd3|Rrp1|SMC1|Sfmbt|Slbp|Sse|Su(var)3-7|Su(z)12|Top2|ac|asf1|asun|bab2|bsk|cato|cdc2|cg|cutlet|danr|dap|dmt|dpa|dup|fd96Cb|gcm|glu|gsb|hd|her|hrg|li…
Mfuzz Cluster23	biological_process	phenol-containing compound metabolic process(GO:0018958)	4	49	52	8.16327	94.2308	2.34273	0.0322	0.441329	CG5235|Eph|Spn27A|bsk
Mfuzz Cluster23	molecular_function	phospholipid binding(GO:0005543)	7	124	133	5.64516	93.2331	2.00835	0.0302	0.419108	Btk29A|CG3077|CG5004|RhoGAP1A|l(2)gd1|scra|sl
Mfuzz Cluster23	biological_process	positive regulation of apoptotic process(GO:0043065)	5	26	28	19.2308	92.8571	5.1743	0	0.00769913	Dp|RnrL|RnrS|Sep1|W
Mfuzz Cluster23	biological_process	positive regulation of cell development(GO:0010720)	5	26	26	19.2308	100	5.1743	0.0002	0.00769913	Dp|Ice|Ras85D|gcm|pyr
Mfuzz Cluster23	biological_process	positive regulation of cell proliferation(GO:0008284)	6	34	34	17.6471	100	5.35141	0	0.00769913	Caf1|Ras85D|RecQ4|gcm|pyr|stg
Mfuzz Cluster23	biological_process	positive regulation of growth(GO:0045927)	4	53	55	7.54717	96.3636	2.16082	0.0412	0.515962	14-3-3epsilon|Ras85D|nmo|sl
Mfuzz Cluster23	biological_process	pre-replicative complex assembly(GO:0036388)	5	7	7	71.4286	100	11.1653	0	0.00769913	Cdc6|Mcm2|Mcm5|Mcm6|Mcm7
Mfuzz Cluster23	molecular_function	protein binding, bridging(GO:0030674)	3	21	21	14.2857	100	3.25612	0.0114	0.241473	Crk|phyl|wech
Mfuzz Cluster23	molecular_function	protein dimerization activity(GO:0046983)	10	160	170	6.25	94.1176	2.75911	0.0062	0.149986	14-3-3epsilon|Caf1|Chrac-14|Dip3|Mitf|ac|cato|ncd|sc|vri
Mfuzz Cluster23	biological_process	protein phosphorylation(GO:0006468)	12	241	252	4.97925	95.6349	2.17406	0.035	0.470243	Btk29A|CG8173|Cks30A|Eph|Pak3|bsk|cdc2|cdc2rk|ial|nmo|otk|sti
Mfuzz Cluster23	biological_process	Ras protein signal transduction(GO:0007265)	3	24	26	12.5	92.3077	2.94364	0.0206	0.359748	14-3-3epsilon|phyl|tum
Mfuzz Cluster23	molecular_function	receptor signaling protein serine/threonine kinase activity(GO:0004702)	3	31	34	9.67742	91.1765	2.38018	0.0384	0.499656	Pak3|bsk|nmo
Mfuzz Cluster23	biological_process	regulation of cell division(GO:0051302)	10	66	69	15.1515	95.6522	6.21891	0	0.00769913	14-3-3epsilon|Cks30A|Gmd|Spindly|dgt4|dgt5|dgt6|rod|stg|sti
Mfuzz Cluster23	biological_process	regulation of cell size(GO:0008361)	4	46	48	8.69565	95.8333	2.49177	0.024	0.379906	Girdin|Ras85D|RhoGAP1A|stg
Mfuzz Cluster23	biological_process	regulation of DNA replication(GO:0006275)	3	16	17	18.75	94.1176	3.93884	0.0068	0.162284	CG10336|RecQ4|mus209
Mfuzz Cluster23	biological_process	regulation of metaphase/anaphase transition of cell cycle(GO:1902099)	3	21	23	14.2857	91.3043	3.25612	0.0156	0.299615	Cks30A|Spindly|rod
Mfuzz Cluster23	biological_process	regulation of mitotic cell cycle(GO:0007346)	22	164	171	13.4146	95.9064	8.47478	0	0.00769913	14-3-3epsilon|CSN8|Caf1|Cks30A|CycC|FANCI|Klp61F|Mcm7|RecQ4|RpA-70|Spindly|Top2|ac|dgt4|dgt5|dgt6|feo|ncd|rod|sc|slx1|stg
Mfuzz Cluster23	biological_process	regulation of NFAT protein import into nucleus(GO:0051532)	3	16	16	18.75	100	3.93884	0.0056	0.138886	feo|pav|scra
Mfuzz Cluster23	biological_process	regulation of protein kinase activity(GO:0045859)	4	51	65	7.84314	78.4615	2.24956	0.036	0.481486	CycC|bsk|dap|par-6
Mfuzz Cluster23	biological_process	regulation of proteolysis(GO:0030162)	8	84	100	9.52381	84	3.8417	0.0008	0.0265288	Cks30A|RnrL|RnrS|Spindly|Spn27A|W|fbl6|rod
Mfuzz Cluster23	biological_process	regulation of retinal cell programmed cell death(GO:0046668)	3	19	19	15.7895	100	3.49974	0.0132	0.268673	Ice|Ras85D|W
Mfuzz Cluster23	biological_process	regulation of Wnt signaling pathway(GO:0030111)	5	51	51	9.80392	100	3.1116	0.0104	0.22569	nmo|otk|pav|phyl|tum
Mfuzz Cluster23	UserSuppliedAssociations	RNAi phenotype in muscle (Schnorrer et al 2010)	64	2028	2121	3.15582	95.6153	3.66869	0.016	0.111444	Act5C|Arf79F|Bap55|BthD|CAP-D2|CG14814|CG2865|CG2990|CG31961|CG5004|CG5149|CG5857|CG8173|Caf1|Caf1-180|Cap|Cwc25|DMAP1|DNApol-alpha60|Dp|Dref|FBgn0264922|FBgn0266452|FBgn0266916|Fcp1|Gmd|HmgD|Orc6|Pole2|Prx6005|RPA2|RnrL|RnrS|RpA-70|Rpd3|SMC1|Sas-4|Spc25|Sse|Top2|W|cdc2|cerv|cg|cid|dup|endoB|feo|fz2|glu|her|l(3)j2D3|mop|msl-1|ncm|nonA|or|otk|pyr|scra|tra|vri|wdb|zetaCOP
Mfuzz Cluster23	biological_process	S phase(GO:0051320)	3	4	4	75	100	8.87756	0	0.00769913	DNApol-alpha60|Hus1-like|hd
Mfuzz Cluster23	biological_process	sensory organ precursor cell division(GO:0045035)	4	10	10	40	100	7.2413	0	0.00769913	Dref|dap|l(2)gd1|scra
Mfuzz Cluster23	cellular_component	spindle(GO:0005819)	9	53	55	16.9811	96.3636	6.3893	0	0.00769913	Klp61F|dgt4|dgt5|dgt6|ial|ncd|pav|rod|tum
Mfuzz Cluster23	cellular_component	SWI/SNF superfamily-type complex(GO:0070603)	6	32	32	18.75	100	5.57484	0.0004	0.0143385	Act5C|Bap55|Caf1|Chrac-14|Rpd3|Top2
Mfuzz Cluster23	cellular_component	transcription factor complex(GO:0005667)	6	90	93	6.66667	96.7742	2.30582	0.0246	0.382332	Caf1|Dp|Dref|ac|gsb|sc
Mfuzz Cluster23	UserSuppliedAssociations	transcription_factors	31	732	754	4.23497	97.0822	4.14796	0.0024	0.0236	CG13123|CG18599|CG6683|CG9705|Chrac-14|D1|Dip3|Dp|Dref|E(var)3-9|FBgn0266452|FBgn0266916|HmgD|Jarid2|Mes4|Su(var)3-7|Su(z)12|ac|bab2|cato|cg|drm|fd96Cb|gcm|gsb|her|mip120|pad|sc|vri|zfh2
Mfuzz Cluster24	biological_process	'de novo' IMP biosynthetic process(GO:0006189)	3	6	6	50	100	6.1042	0.0004	0.0102063	Dhfr|ade3|ade5
Mfuzz Cluster24	biological_process	actin cytoskeleton organization(GO:0030036)	11	107	112	10.2804	95.5357	3.73108	0.0006	0.0147567	Apc2|Arp66B|G-ialpha65A|blow|dah|ena|jar|kug|l(2)gl|pnut|tw
Mfuzz Cluster24	biological_process	actin filament organization(GO:0007015)	9	94	103	9.57447	91.2621	3.12559	0.0032	0.0550151	Arp66B|Dl|N|Sos|ed|ena|gro|jar|pico
Mfuzz Cluster24	cellular_component	actin filament(GO:0005884)	3	20	21	15	95.2381	2.74037	0.0278	0.301644	Apc2|Arp14D|Arp66B
Mfuzz Cluster24	cellular_component	adherens junction(GO:0005912)	10	62	66	16.129	93.9394	5.31392	0.0002	0.0055511	Apc2|Dl|N|RASSF8|bib|ed|ena|kug|shg|yrt
Mfuzz Cluster24	biological_process	anatomical structure development(GO:0048856)	108	1128	1189	9.57447	94.8696	11.4425	0	0.0055511	Acf1|Amun|Antp|Apc2|Arp66B|Bap60|CG1518|Chi|CtBP|Dl|Dll|Doc1|Doc2|Doc3|Dr|Dsp1|Egfr|Eogt|Fas2|Fas3|G-ialpha65A|G9a|Gp93|Gug|HLHmdelta|Lac|LanA|Mi-2|N|NijA|Pcaf|RASSF8|Sema-5c|Sin3A|Snr1|Sos|Sox100B|Ssdp|Su(var)3-9|Sxl|Taf4|Tina-1|Wnt2|Wnt5|aPKC|akirin|alphaTub67C|ap|arr|bib|blow|bon|brm|cas|chinmo|chm|cic|d|drl|ed|edl|ems|ena|enok|fz|fz4|gbb|glo|grn|gro|hdc|heph|hth|ihog|jar|jumu|kn|knk|kto|kug|l…
Mfuzz Cluster24	biological_process	anatomical structure morphogenesis(GO:0009653)	81	814	866	9.95086	93.9954	10.1539	0	0.0055511	Acf1|Apc2|Arp14D|Arp66B|Bap60|Chi|Dl|Dll|Dr|Egfr|Fas2|Fas3|Gap1|Gp93|Gug|ImpE1|Lac|LanA|Mi-2|Mkp3|N|Pcaf|R|Sema-5c|Sin3A|Snr1|Sos|Taf4|Wnt5|aPKC|ade5|ap|arr|ash2|bon|brm|chinmo|chm|cic|d|drl|ds|ed|ems|ena|fs(1)h|ft|fz|gbb|grn|gro|hdc|heph|hth|inv|jar|jumu|kn|knk|kug|l(2)gl|lin|lola|lwr|nej|opa|ph-p|pk|ptc|put|sbb|shg|sob|spdo|spi|ss|sty|trn|tsh|vg|yrt
Mfuzz Cluster24	cellular_component	anchored component of membrane(GO:0031225)	4	14	14	28.5714	100	5.02031	0.0014	0.0293735	Ama|Fas2|GNBP1|Lac
Mfuzz Cluster24	cellular_component	apical cortex(GO:0045179)	3	24	25	12.5	96	2.34418	0.0454	0.395252	Apc2|G-ialpha65A|aPKC
Mfuzz Cluster24	biological_process	asymmetric protein localization involved in cell fate determination(GO:0045167)	4	14	14	28.5714	100	5.02031	0.0002	0.0055511	G-ialpha65A|aPKC|jar|l(2)gl
Mfuzz Cluster24	biological_process	axonal fasciculation(GO:0007413)	3	15	16	20	93.75	3.41311	0.0088	0.124267	Arp66B|Fas2|Fas3
Mfuzz Cluster24	biological_process	behavioral response to ethanol(GO:0048149)	5	37	37	13.5135	100	3.24414	0.0068	0.101189	Egfr|Fas2|Sir2|hang|spi
Mfuzz Cluster24	biological_process	cardiocyte differentiation(GO:0035051)	3	14	14	21.4286	100	3.5844	0.0094	0.130656	Doc1|Doc2|Doc3
Mfuzz Cluster24	cellular_component	cell cortex(GO:0005938)	6	57	58	10.5263	98.2759	2.81631	0.0076	0.110675	Apc2|G-ialpha65A|aPKC|fz|jar|l(2)gl
Mfuzz Cluster24	biological_process	cell division(GO:0051301)	15	113	116	13.2743	97.4138	5.55392	0	0.0055511	Dl|G-ialpha65A|Incenp|N|Su(var)3-9|aPKC|alphaTub67C|fz|jar|l(2)gl|msi|ptc|put|shg|spdo
Mfuzz Cluster24	biological_process	cell fate commitment(GO:0045165)	17	113	115	15.0442	98.2609	6.56983	0	0.0055511	Dl|Doc1|Egfr|G-ialpha65A|N|R|aPKC|ap|fz|hth|jar|l(2)gl|lola|nej|ptc|skd|spi
Mfuzz Cluster24	biological_process	cell junction organization(GO:0034330)	5	49	53	10.2041	92.4528	2.48875	0.019	0.228568	G-ialpha65A|aPKC|jar|l(2)gl|shg
Mfuzz Cluster24	cellular_component	cell-cell adherens junction(GO:0005913)	3	14	15	21.4286	93.3333	3.5844	0.008	0.115362	ed|shg|yrt
Mfuzz Cluster24	biological_process	cell-cell adhesion(GO:0098609)	11	40	42	27.5	95.2381	8.13243	0	0.0055511	Fas2|Fas3|Lac|N|alphaPS5|ds|ed|ft|fz|kug|shg
Mfuzz Cluster24	biological_process	chromatin assembly or disassembly(GO:0006333)	3	20	128	15	15.625	2.74037	0.025	0.281258	Acf1|Mi-2|Su(var)3-9
Mfuzz Cluster24	molecular_function	chromatin binding(GO:0003682)	27	100	105	27	95.2381	12.6277	0	0.0055511	CDC45L|CG10494|CG33695|CTCF|Gug|HP1b|Mcm3|Mi-2|Myb|N|Pc|Pcaf|Ssrp|Su(var)205|Su(var)3-9|bon|crm|dre4|dwg|e(y)2|jumu|mle|ph-d|ph-p|prod|tou|trx
Mfuzz Cluster24	biological_process	chromatin remodeling(GO:0006338)	11	39	40	28.2051	97.5	8.26661	0	0.0055511	Acf1|Dsp1|Mi-2|Psc|Snr1|Su(var)205|Su(var)3-9|ash2|brm|tou|trx
Mfuzz Cluster24	cellular_component	chromosomal part(GO:0044427)	33	246	369	13.4146	66.6667	8.37004	0	0.0055511	Bub3|CG11329|CG15356|CG8142|CG8677|Df31|G9a|Gug|Incenp|Mlh1|Myb|Orc4|Pc|Pep|Psc|RpII215|Sap130|Sin3A|Su(var)205|Su(var)3-9|dwg|e(y)2|enok|jumu|lwr|mip130|mle|ph-d|pps|prod|rec|yemalpha|z
Mfuzz Cluster24	biological_process	chromosome organization(GO:0051276)	15	144	149	10.4167	96.6443	4.42495	0.0004	0.0102063	CDC45L|CTCF|Gap1|Incenp|Myb|Su(var)205|Su(var)3-9|Top3alpha|Top3beta|baf|dre4|glo|prod|spel1|tefu
Mfuzz Cluster24	cellular_component	chromosome(GO:0005694)	21	116	123	18.1034	94.3089	8.43684	0	0.0055511	CG8677|Dsp1|Incenp|Mes-4|Mi-2|Myb|Pcaf|RpII215|Sin3A|Snr1|Su(var)205|Top3alpha|Top3beta|akirin|ash2|east|jumu|mip130|mle|prod|trx
Mfuzz Cluster24	biological_process	compound eye retinal cell programmed cell death(GO:0046667)	3	10	10	30	100	4.48475	0.0026	0.0477602	Dl|N|aPKC
Mfuzz Cluster24	biological_process	cytoplasmic transport, nurse cell to oocyte(GO:0007303)	3	17	18	17.6471	94.4444	3.11259	0.0138	0.179157	Arp66B|ena|jar
Mfuzz Cluster24	biological_process	determination of muscle attachment site(GO:0016204)	4	9	9	44.4444	100	6.58199	0.0004	0.0102063	Wnt5|drl|kn|vg
Mfuzz Cluster24	molecular_function	DNA binding(GO:0003677)	78	700	846	11.1429	82.7423	11.114	0	0.0055511	Acf1|Antp|Bap60|CDC45L|CG10494|CG11403|CG11696|CG13151|CG16863|CG1737|CG33695|CG7239|CG8142|CTCF|Chrac-16|Crg-1|DNApol-iota|Dll|Dr|Dsp1|E5|G-ialpha65A|Gug|HLHmdelta|Mcm3|Mi-2|Mlh1|Myb|Nf-YC|Orc4|Pc|Pep|Psc|RpII215|Sos|Sox100B|Ssdp|Ssrp|Su(var)205|Taf4|Taf6|Top3alpha|Top3beta|Unr|ap|baf|brm|cas|chif|cic|crm|crp|dmrt93B|dre4|dwg|e(y)2|edl|ems|enok|fs(1)h|grn|hth|inv|jigr1|jumu|kn|mip130|mus205|ph-d…
Mfuzz Cluster24	molecular_function	DNA helicase activity(GO:0003678)	5	37	37	13.5135	100	3.24414	0.005	0.0790536	CDC45L|CG11403|Mcm3|Mi-2|rec
Mfuzz Cluster24	biological_process	DNA integrity checkpoint(GO:0031570)	10	74	77	13.5135	96.1039	4.59647	0.0002	0.0055511	CDC45L|CG9797|Mcm3|Rga|RpII215|lok|lwr|nej|tefu|timeout
Mfuzz Cluster24	biological_process	DNA metabolic process(GO:0006259)	26	231	244	11.2554	94.6721	6.3219	0	0.0055511	CDC45L|CG11403|CG8142|CTCF|DNApol-iota|Incenp|Mcm3|Mlh1|Myb|Orc4|Su(var)205|Su(var)3-9|Sxl|Top3alpha|Top3beta|chif|crm|mei-38|mip130|mu2|mus205|pita|prod|rec|spel1|tefu
Mfuzz Cluster24	biological_process	dorsal appendage formation(GO:0046843)	4	34	36	11.7647	94.4444	2.56095	0.0218	0.252971	Egfr|N|cic|ed
Mfuzz Cluster24	cellular_component	early endosome(GO:0005769)	3	21	21	14.2857	100	2.63226	0.0282	0.303381	arr|spdo|wus
Mfuzz Cluster24	cellular_component	endocytic vesicle(GO:0030139)	3	8	10	37.5	80	5.15026	0.0008	0.01864	Dl|jar|ptc
Mfuzz Cluster24	cellular_component	endoplasmic reticulum lumen(GO:0005788)	3	9	10	33.3333	90	4.79153	0.0016	0.0324917	Eogt|Torsin|rumi
Mfuzz Cluster24	biological_process	epithelial cell proliferation(GO:0050673)	3	10	11	30	90.9091	4.48475	0.0022	0.0423452	Egfr|N|spi
Mfuzz Cluster24	biological_process	ERBB signaling pathway(GO:0038127)	4	34	36	11.7647	94.4444	2.56095	0.0202	0.240714	Egfr|ed|spi|sty
Mfuzz Cluster24	biological_process	establishment of epithelial cell polarity(GO:0090162)	5	13	13	38.4615	100	6.75323	0	0.0055511	aPKC|ds|ft|fz|l(2)gl
Mfuzz Cluster24	biological_process	establishment of spindle localization(GO:0051293)	3	19	19	15.7895	100	2.85579	0.0216	0.251309	Apc2|G-ialpha65A|jar
Mfuzz Cluster24	biological_process	establishment or maintenance of bipolar cell polarity(GO:0061245)	7	36	37	19.4444	97.2973	5.11386	0.0002	0.0055511	Egfr|aPKC|ds|ft|fz|l(2)gl|yrt
Mfuzz Cluster24	biological_process	establishment or maintenance of cytoskeleton polarity(GO:0030952)	3	23	23	13.0435	100	2.43481	0.034	0.320934	Apc2|kug|l(2)gl
Mfuzz Cluster24	biological_process	establishment or maintenance of neuroblast polarity(GO:0045196)	3	8	9	37.5	88.8889	5.15026	0.0014	0.0293735	Zif|aPKC|l(2)gl
Mfuzz Cluster24	biological_process	establishment or maintenance of polarity of follicular epithelium(GO:0016334)	4	24	24	16.6667	100	3.44143	0.0078	0.11303	Egfr|aPKC|kug|l(2)gl
Mfuzz Cluster24	cellular_component	extrinsic component of membrane(GO:0019898)	5	25	28	20	89.2857	4.40852	0.0012	0.0258511	G-ialpha65A|ImpE1|Lac|dah|yrt
Mfuzz Cluster24	biological_process	female gamete generation(GO:0007292)	12	188	199	6.38298	94.4724	2.06956	0.0322	0.312608	Dl|Egfr|N|Su(var)3-9|Sxl|brm|glo|jar|kug|ptc|shg|yemalpha
Mfuzz Cluster24	biological_process	female meiosis chromosome segregation(GO:0016321)	5	31	31	16.129	100	3.75165	0.0026	0.0477602	Gap1|LanA|east|lwr|mei-38
Mfuzz Cluster24	biological_process	female meiotic division(GO:0007143)	4	22	24	18.1818	91.6667	3.67657	0.0046	0.0740516	cort|lwr|mei-38|yemalpha
Mfuzz Cluster24	biological_process	formation of anatomical boundary(GO:0048859)	4	28	28	14.2857	100	3.04055	0.0084	0.119764	ds|ft|hth|spi
Mfuzz Cluster24	cellular_component	germline ring canal(GO:0045172)	3	18	18	16.6667	100	2.97947	0.0204	0.242445	Sep2|jar|pnut
Mfuzz Cluster24	biological_process	hemocyte proliferation(GO:0035172)	3	11	11	27.2727	100	4.21798	0.0042	0.068484	N|brm|lwr
Mfuzz Cluster24	molecular_function	histone acetyltransferase activity(GO:0004402)	4	13	13	30.7692	100	5.26318	0.0006	0.0147567	Pcaf|chm|enok|nej
Mfuzz Cluster24	biological_process	histone H3 acetylation(GO:0043966)	3	9	10	33.3333	90	4.79153	0.0026	0.0477602	Pcaf|nej|trx
Mfuzz Cluster24	biological_process	imaginal disc growth(GO:0007446)	3	18	19	16.6667	94.7368	2.97947	0.0222	0.255603	N|Sxl|ft
Mfuzz Cluster24	biological_process	inter-male aggressive behavior(GO:0002121)	6	46	48	13.0435	95.8333	3.44733	0.0026	0.0477602	CG9894|LanA|ade5|ed|l(3)L1231|lola
Mfuzz Cluster24	cellular_component	intracellular(GO:0005622)	51	711	739	7.173	96.2111	5.3103	0	0.0055511	Br140|CG10631|CG11696|CG12236|CG12877|CG16863|CG17361|CG30440|CG31365|CG31388|CG4936|CG5521|CG5745|CG6197|CG6791|CG7369|CG8944|CG9797|CTCF|Chrac-16|D19A|GEFmeso|Gap1|N|Nf-YC|Nxt1|Pep|RhoGAP15B|RhoGEF4|Sos|Toll-7|Zif|az2|bon|cas|chinmo|dwg|hang|lola|mle|mu2|opa|pita|sbb|sob|sty|tou|tsh|wdn|wek|zf30C
Mfuzz Cluster24	biological_process	localization of cell(GO:0051674)	4	15	15	26.6667	100	4.80041	0.0004	0.0102063	Apc2|Dl|N|shg
Mfuzz Cluster24	biological_process	locomotion(GO:0040011)	22	277	297	7.94224	93.266	3.93667	0	0.0055511	Dl|Egfr|Fas3|LanA|Mdr49|N|R|Sema-2b|Sema-5c|Torsin|Wnt5|ena|fz|iav|jar|lola|nej|opa|shg|spi|trn|trx
Mfuzz Cluster24	biological_process	maintenance of epithelial integrity, open tracheal system(GO:0035160)	4	12	12	33.3333	100	5.53362	0.0008	0.01864	Egfr|Lac|Mkp3|shg
Mfuzz Cluster24	molecular_function	mRNA 3'-UTR binding(GO:0003730)	3	21	24	14.2857	87.5	2.63226	0.0222	0.255603	Sxl|Unr|heph
Mfuzz Cluster24	biological_process	multicellular organismal development(GO:0007275)	5	44	46	11.3636	95.6522	2.77164	0.0104	0.141664	Dl|N|Wnt2|Wnt5|sty
Mfuzz Cluster24	biological_process	muscle attachment(GO:0016203)	4	28	28	14.2857	100	3.04055	0.0112	0.150706	Egfr|akirin|drl|tw
Mfuzz Cluster24	biological_process	muscle cell fate specification(GO:0042694)	3	7	7	42.8571	100	5.57863	0.0004	0.0102063	Antp|Egfr|kn
Mfuzz Cluster24	biological_process	negative regulation of cell development(GO:0010721)	6	45	47	13.3333	95.7447	3.51411	0.0024	0.0454051	Dl|Egfr|N|ed|l(2)gl|spi
Mfuzz Cluster24	biological_process	negative regulation of fusion cell fate specification(GO:0035157)	3	3	3	100	100	8.96601	0	0.0055511	Dl|N|ed
Mfuzz Cluster24	biological_process	negative regulation of macromolecule biosynthetic process(GO:0010558)	34	235	247	14.4681	95.1417	9.05358	0	0.0055511	Acf1|Apc2|CG8677|CTCF|CtBP|Dsp1|Gug|HLHmdelta|Mi-2|N|NELF-B|Pc|Psc|Sin3A|Sir2|Su(var)205|Su(var)3-9|Sxl|Unr|cas|chm|cic|edl|fs(1)h|gro|heph|mip130|msi|ph-d|ph-p|sbb|ss|tefu|tsh
Mfuzz Cluster24	biological_process	negative regulation of organ growth(GO:0046621)	3	15	15	20	100	3.41311	0.0098	0.135155	ed|ft|kug
Mfuzz Cluster24	biological_process	negative regulation of response to stimulus(GO:0048585)	18	174	178	10.3448	97.7528	4.82021	0.0002	0.0055511	Apc2|Dsp1|Fas2|Gap1|Gug|Mkp3|N|dx|ed|ft|gro|l(2)gl|lwr|ptc|rumi|sbb|spdo|sty
Mfuzz Cluster24	biological_process	negative regulation of terminal cell fate specification, open tracheal system(GO:0035155)	4	4	4	100	100	10.3536	0	0.0055511	Dl|N|hdc|sty
Mfuzz Cluster24	biological_process	neural precursor cell proliferation(GO:0061351)	3	18	18	16.6667	100	2.97947	0.0172	0.211512	Apc2|Zif|enok
Mfuzz Cluster24	biological_process	neuron projection guidance(GO:0097485)	27	186	194	14.5161	95.8763	8.06991	0	0.0055511	Apc2|Br140|Chi|Fas3|LanA|N|Nf-YC|NijA|Psc|Sema-2b|Sema-5c|Snr1|Wnt5|ap|bon|brm|drl|ena|enok|grn|lola|ptc|put|sbb|shg|trn|trx
Mfuzz Cluster24	biological_process	Notch signaling pathway(GO:0007219)	8	44	46	18.1818	95.6522	5.2052	0.0004	0.0102063	Dl|HLHmdelta|N|bib|dx|heph|rumi|spdo
Mfuzz Cluster24	molecular_function	nucleic acid binding transcription factor activity(GO:0001071)	42	422	443	9.95261	95.2596	7.16142	0	0.0055511	Antp|CG7818|CTCF|Crg-1|Dll|Doc1|Doc2|Doc3|Dr|E5|HLHmdelta|Myb|Nf-YC|Sin3A|Sox100B|Taf4|Taf6|ap|cas|chinmo|chm|cic|dmrt93B|dwg|e(y)2|ems|grn|hth|inv|jumu|kn|lola|opa|pps|sbb|sob|ss|trx|tsh|vg|wek|zf30C
Mfuzz Cluster24	biological_process	nucleic acid-templated transcription(GO:0097659)	13	116	123	11.2069	94.3089	4.42551	0	0.0055511	Chi|CycH|MED1|MED16|RpII215|Taf6|ap|e(y)2|jumu|kto|pps|skd|ss
Mfuzz Cluster24	cellular_component	nucleolus(GO:0005730)	5	59	64	8.47458	92.1875	2.01694	0.0368	0.335213	Pc|Ssrp|jumu|ph-d|ph-p
Mfuzz Cluster24	cellular_component	nucleoplasm part(GO:0044451)	28	250	260	11.2	96.1538	6.53554	0	0.0055511	CDC45L|CG15356|CycH|IntS12|MED1|MED16|MED19|Mcm3|Mi-2|NELF-B|Pcaf|RpII215|Sap130|Sin3A|Ssrp|Taf4|Taf6|ash2|dre4|e(y)2|enok|kto|omd|qkr58E-3|rec|skd|trx|wda
Mfuzz Cluster24	cellular_component	nucleoplasm(GO:0005654)	5	29	29	17.2414	100	3.95033	0.0008	0.01864	Bub3|Ipk2|Nxt1|Sir2|east
Mfuzz Cluster24	biological_process	nucleosome organization(GO:0034728)	4	31	142	12.9032	21.831	2.78586	0.0168	0.208622	Acf1|Df31|Mi-2|enok
Mfuzz Cluster24	biological_process	nucleus organization(GO:0006997)	3	23	25	13.0435	92	2.43481	0.0304	0.310094	alphaTub67C|jar|jumu
Mfuzz Cluster24	cellular_component	nucleus(GO:0005634)	128	1254	1407	10.2073	89.1258	13.4383	0	0.0055511	Amun|Antp|Aos1|Apc2|Axud1|Bap60|CDC45L|CG11696|CG15356|CG17361|CG2926|CG31365|CG31388|CG31457|CG3605|CG4936|CG6197|CG7818|CG7879|CG8677|CG9797|CG9894|CTCF|Chi|Crg-1|CtBP|D19A|Dll|Doc1|Doc2|Doc3|Dr|Dsp1|E5|G9a|Gug|HLHmdelta|HP1b|Hmt4-20|MED1|MED16|Mes-4|Mi-2|Mlh1|Myb|N|NELF-B|Nf-YC|Nxt1|Orc4|Pc|Pcaf|Pep|Pp4-19C|Psc|Rga|RpII215|Sin3A|Sir2|Snr1|Sox100B|Ssdp|Ssrp|Su(var)205|Su(var)3-9|TORC|Taf4|Taf6|…
Mfuzz Cluster24	molecular_function	oligosaccharyl transferase activity(GO:0004576)	3	7	7	42.8571	100	5.57863	0.0012	0.0258511	CG1518|CG33303|OstStt3
Mfuzz Cluster24	molecular_function	pattern recognition receptor activity(GO:0038187)	3	7	7	42.8571	100	5.57863	0.001	0.0223023	GNBP1|GNBP3|Toll-7
Mfuzz Cluster24	biological_process	pattern specification process(GO:0007389)	57	383	399	14.8825	95.99	12.0909	0	0.0055511	Antp|Apc2|CTCF|Chi|Dl|Dll|Dr|Dsp1|Egfr|GEFmeso|Gap1|Gug|Mkp3|N|Nf-YC|Pc|Snr1|Sos|aPKC|ap|ash2|brm|chm|cic|crm|dos|ds|edl|ems|fs(1)h|ft|fz|gbb|glo|hth|ihog|inv|kn|knk|kto|l(2)gl|lin|lwr|nkd|opa|ptc|put|rasp|sbb|shg|skd|spi|ss|sty|tsh|vg|wek
Mfuzz Cluster24	biological_process	peptidyl-lysine methylation(GO:0018022)	6	22	22	27.2727	100	5.96842	0	0.0055511	G9a|Hmt4-20|Su(var)205|Su(var)3-9|ash2|trx
Mfuzz Cluster24	molecular_function	phospholipid binding(GO:0005543)	10	124	133	8.06452	93.2331	2.68694	0.0064	0.0965342	CG30440|GEFmeso|Gap1|Klp98A|RhoGAP15B|RhoGEF4|Sos|blow|dos|pico
Mfuzz Cluster24	cellular_component	plasma membrane part(GO:0044459)	26	352	384	7.38636	91.6667	3.8849	0	0.0055511	Apc2|CG11069|CG8908|Dl|Egfr|Fas2|Fas3|G-ialpha65A|Gap1|Mdr49|N|Toll-7|aPKC|alphaPS5|bib|ds|ft|fz|kek5|kug|l(2)gl|pnut|ptc|put|shg|yrt
Mfuzz Cluster24	cellular_component	plasma membrane(GO:0005886)	33	370	395	8.91892	93.6709	5.59963	0	0.0055511	Ama|Dl|Egfr|Fas2|Fas3|Gap1|Lac|N|Sema-2b|Sema-5c|Toll-7|arr|bib|dos|drl|ds|ed|ft|fz|kek5|l(2)gl|pnut|ptc|put|rasp|rho-4|shg|spdo|spi|sty|trn|wek|wus
Mfuzz Cluster24	biological_process	positive regulation of biological process(GO:0048518)	60	630	657	9.52381	95.8904	8.24993	0	0.0055511	Antp|Aos1|Apc2|Arp66B|Bap60|CG11329|CaBP1|Chi|CtBP|Dl|Doc1|Doc2|Doc3|Egfr|G9a|Gap1|Ipk2|Myb|N|Pdcd4|Snr1|Su(var)205|TORC|Taf4|Toll-7|Torsin|Uba2|aPKC|akirin|ap|ash2|brm|chm|cort|d|dre4|dx|e(y)2|ena|g|gbb|glo|hth|ihog|jar|kn|kto|l(2)gl|lok|lola|nej|pico|pnut|shf|skd|spi|tou|trx|vg|z
Mfuzz Cluster24	cellular_component	PRC1 complex(GO:0035102)	5	9	10	55.5556	90	8.37244	0	0.0055511	Pc|Psc|ph-d|ph-p|z
Mfuzz Cluster24	molecular_function	protein binding(GO:0005515)	157	2536	2696	6.19085	94.0653	8.11669	0	0.0055511	Acf1|Ama|Aos1|Apc2|Arp14D|Arp66B|Bap60|Br140|Bub3|CG11436|CG12236|CG1240|CG13074|CG14650|CG15701|CG15861|CG2926|CG30440|CG31457|CG34133|CG34371|CG6621|CG6749|CG7102|CG7457|CG7509|CG7785|CG8949|Chi|Chrac-16|CtBP|CycH|Df31|Dl|Dsp1|Fas2|Fas3|G-ialpha65A|G9a|GEFmeso|GNBP1|Gap1|Gp93|GstD10|Gug|HLHmdelta|Hmt4-20|ImpE1|Incenp|IntS12|Klp98A|Lac|LanA|Magi|Mes-4|Mi-2|Mlh1|N|Oseg4|POSH|Pc|Pcaf|Psc|RhoGAP15B…
Mfuzz Cluster24	biological_process	protein sumoylation(GO:0016925)	3	3	3	100	100	8.96601	0.0004	0.0102063	Aos1|Uba2|lwr
Mfuzz Cluster24	biological_process	protein-DNA complex assembly(GO:0065004)	7	55	167	12.7273	32.9341	3.64497	0.0014	0.0293735	Acf1|Df31|Mcm3|Taf4|Taf6|enok|mle
Mfuzz Cluster24	biological_process	pseudocleavage(GO:0030588)	3	9	9	33.3333	100	4.79153	0.0026	0.0477602	Apc2|Arp66B|jar
Mfuzz Cluster24	biological_process	R7 cell differentiation(GO:0045466)	4	9	9	44.4444	100	6.58199	0	0.0055511	Egfr|HLHmdelta|N|nej
Mfuzz Cluster24	molecular_function	Ras guanyl-nucleotide exchange factor activity(GO:0005088)	5	32	33	15.625	96.9697	3.65855	0.002	0.0392639	CG30440|CG7369|GEFmeso|RhoGEF4|Sos
Mfuzz Cluster24	biological_process	regulation of actin filament-based process(GO:0032970)	6	41	41	14.6341	100	3.80173	0.002	0.0392639	Arp14D|Arp66B|ed|ena|fz|jar
Mfuzz Cluster24	biological_process	regulation of cell division(GO:0051302)	6	66	69	9.09091	95.6522	2.40371	0.0164	0.204515	Bub3|Myb|nej|pico|rumi|spel1
Mfuzz Cluster24	biological_process	regulation of cell morphogenesis(GO:0022604)	10	144	148	6.94444	97.2973	2.17157	0.0176	0.215832	CG7369|Fas2|G9a|R|RhoGEF4|Sos|ed|ena|l(2)gl|ss
Mfuzz Cluster24	biological_process	regulation of cell proliferation(GO:0042127)	13	101	101	12.8713	100	5.02898	0	0.0055511	Axud1|Dl|Egfr|Mkp3|Myb|N|Snr1|aPKC|ft|l(2)gl|lwr|spi|vg
Mfuzz Cluster24	biological_process	regulation of chromatin assembly or disassembly(GO:0001672)	3	4	6	75	66.6667	7.66857	0	0.0055511	Bap60|Ssrp|dre4
Mfuzz Cluster24	biological_process	regulation of chromatin modification(GO:1903308)	3	16	17	18.75	94.1176	3.25656	0.0142	0.183275	Bap60|Sir2|Su(var)205
Mfuzz Cluster24	biological_process	regulation of filopodium assembly(GO:0051489)	3	10	10	30	100	4.48475	0.0026	0.0477602	Arp66B|N|ena
Mfuzz Cluster24	biological_process	regulation of gene expression(GO:0010468)	110	936	987	11.7521	94.8328	14.0696	0	0.0055511	Acf1|Antp|Aos1|Apc2|Bap60|CG2926|CG6197|CG7879|CG8677|CTCF|Chi|Crg-1|CtBP|CycH|Dll|Doc1|Doc2|Doc3|Dr|Dsp1|E5|G9a|Gap1|Gug|HLHmdelta|Hmt4-20|MED1|MED19|Mes-4|Mi-2|Myb|N|NELF-B|Pc|Pcaf|Pep|Psc|Rga|Sin3A|Sir2|Snr1|Sos|Sox100B|Ssdp|Su(var)205|Su(var)3-9|Sxl|TORC|Taf4|Taf6|Uba2|Unr|ap|ash2|brm|cas|chm|cic|crm|dmrt93B|dos|dre4|e(y)2|east|edl|ems|enok|fs(1)h|g|gbb|glo|grn|gro|hdc|heph|hth|inv|jigr1|jumu…
Mfuzz Cluster24	biological_process	regulation of gene silencing(GO:0060968)	4	37	38	10.8108	97.3684	2.35985	0.0248	0.279363	e(y)2|g|pita|z
Mfuzz Cluster24	biological_process	regulation of hemocyte differentiation(GO:0045610)	4	23	24	17.3913	95.8333	3.5556	0.005	0.0790536	Egfr|N|kn|lwr
Mfuzz Cluster24	biological_process	regulation of imaginal disc growth(GO:0045570)	4	25	25	16	100	3.33338	0.0068	0.101189	d|ft|kug|sbb
Mfuzz Cluster24	biological_process	regulation of mitotic cell cycle(GO:0007346)	17	164	171	10.3659	95.9064	4.69184	0	0.0055511	Bub3|CDC45L|CG9797|Dl|Egfr|Mcm3|Myb|N|Pp4-19C|Rga|RpII215|Sin3A|lwr|nej|ptc|tefu|vg
Mfuzz Cluster24	biological_process	regulation of nucleobase-containing compound metabolic process(GO:0019219)	99	806	847	12.2829	95.1594	13.8069	0	0.0055511	Acf1|Antp|Aos1|Apc2|Bap60|CG2926|CG6197|CG7879|CG8677|CTCF|Chi|Crg-1|CtBP|CycH|Dll|Doc1|Doc2|Doc3|Dr|Dsp1|E5|Gap1|Gug|HLHmdelta|MED1|MED19|Mi-2|Myb|N|NELF-B|Pc|Pcaf|Pep|Psc|Rga|Sin3A|Sir2|Snr1|Sos|Sox100B|Ssdp|Su(var)205|Su(var)3-9|Sxl|TORC|Taf4|Taf6|Uba2|Unr|ap|ash2|brm|cas|chif|chm|cic|crm|dmrt93B|dos|dre4|e(y)2|edl|ems|enok|fs(1)h|gbb|grn|gro|hth|inv|jumu|kn|knk|kto|lin|lok|lola|mip130|nej|opa…
Mfuzz Cluster24	biological_process	regulation of organ morphogenesis(GO:2000027)	8	58	59	13.7931	98.3051	4.1807	0.0006	0.0147567	Egfr|Gap1|N|nkd|put|spi|sty|tsh
Mfuzz Cluster24	biological_process	regulation of signal transduction(GO:0009966)	39	392	410	9.94898	95.6098	6.88743	0	0.0055511	Apc2|Arp66B|CG30440|CG5521|CG7369|CtBP|Fas2|GEFmeso|Gap1|Gug|Ipk2|Mkp3|N|Nf-YC|RhoGEF4|Sos|brm|dos|dx|ed|edl|enok|ft|glo|gro|ihog|kek5|kn|kto|l(2)gl|lwr|ptc|rumi|sbb|shf|skd|spdo|spi|sty
Mfuzz Cluster24	biological_process	regulation of tube length, open tracheal system(GO:0035159)	5	23	24	21.7391	95.8333	4.6764	0.0008	0.01864	Fas2|ds|ft|fz|wus
Mfuzz Cluster24	biological_process	second mitotic wave involved in compound eye morphogenesis(GO:0016330)	4	8	8	50	100	7.04923	0	0.0055511	Dl|Egfr|N|spi
Mfuzz Cluster24	cellular_component	septate junction(GO:0005918)	4	22	24	18.1818	91.6667	3.67657	0.0032	0.0550151	Fas3|Lac|l(2)gl|yrt
Mfuzz Cluster24	cellular_component	septin complex(GO:0031105)	3	6	6	50	100	6.1042	0.0006	0.0147567	Sep2|Sep5|pnut
Mfuzz Cluster24	cellular_component	septin ring(GO:0005940)	3	5	5	60	100	6.7729	0.0002	0.0055511	Sep2|Sep5|pnut
Mfuzz Cluster24	biological_process	single organism cell adhesion(GO:0098602)	8	27	29	29.6296	93.1034	7.27203	0	0.0055511	Apc2|Egfr|Mkp3|bib|ds|ed|ft|shg
Mfuzz Cluster24	molecular_function	single-stranded RNA binding(GO:0003727)	4	23	24	17.3913	95.8333	3.5556	0.0052	0.0816326	Pep|Ssrp|Sxl|heph
Mfuzz Cluster24	biological_process	smoothened signaling pathway(GO:0007224)	6	30	32	20	93.75	4.83051	0	0.0055511	Sxl|ihog|nej|ptc|rasp|shf
Mfuzz Cluster24	biological_process	startle response(GO:0001964)	3	12	13	25	92.3077	3.98281	0.0064	0.0965342	LanA|Sema-5c|lola
Mfuzz Cluster24	biological_process	stem cell fate determination(GO:0048867)	5	30	31	16.6667	96.7742	3.8488	0.0012	0.0258511	Dr|N|cas|inv|jumu
Mfuzz Cluster24	biological_process	stem cell maintenance(GO:0019827)	7	53	55	13.2075	96.3636	3.76594	0.001	0.0223023	Dl|Egfr|N|R|msi|put|shg
Mfuzz Cluster24	cellular_component	SWI/SNF superfamily-type complex(GO:0070603)	7	32	32	21.875	100	5.5598	0	0.0055511	Acf1|Bap60|CG8677|Chrac-16|Mi-2|Snr1|brm
Mfuzz Cluster24	biological_process	syncytial blastoderm mitotic cell cycle(GO:0035186)	4	14	15	28.5714	93.3333	5.02031	0.002	0.0392639	Pc|Psc|ph-d|ph-p
Mfuzz Cluster24	molecular_function	transcription factor binding transcription factor activity(GO:0000989)	22	107	111	20.5607	96.3964	9.47133	0	0.0055511	Bap60|Chi|CtBP|Gug|MED1|MED16|MED19|Mes-4|Sin3A|Snr1|TORC|akirin|bon|brm|chm|cic|edl|gro|kto|nej|sbb|skd
Mfuzz Cluster24	biological_process	transcription initiation from RNA polymerase II promoter(GO:0006367)	7	66	66	10.6061	100	3.06678	0.005	0.0790536	CycH|MED1|MED16|Taf4|Taf6|kto|skd
Mfuzz Cluster24	UserSuppliedAssociations	transcription_factors	71	732	754	9.69945	97.0822	10.9825	0	0.00337143	Antp|Br140|CG10631|CG11696|CG12236|CG16863|CG17361|CG31365|CG31388|CG33695|CG4936|CG6791|CG8944|CG9797|CTCF|Chrac-16|Crg-1|D19A|Dll|Doc1|Doc2|Doc3|Dr|Dsp1|E5|FBgn0266441|Gug|HLHmdelta|HP1b|Mi-2|Myb|Nf-YC|Pep|Psc|Sox100B|Su(var)205|Unr|Zif|ap|ash2|az2|bon|cas|chinmo|chm|cic|crm|crp|dmrt93B|dwg|ems|grn|hang|hth|inv|jumu|kn|lola|nej|opa|ph-p|pita|sob|ss|trx|tsh|wdn|wek|yemalpha|z|zf30C
Mfuzz Cluster24	cellular_component	transcriptional repressor complex(GO:0017053)	3	18	19	16.6667	94.7368	2.97947	0.017	0.210221	Mi-2|NELF-B|Sin3A
Mfuzz Cluster24	molecular_function	translation repressor activity, nucleic acid binding(GO:0000900)	3	8	8	37.5	100	5.15026	0.0018	0.0359756	Sxl|heph|msi
Mfuzz Cluster24	molecular_function	transmembrane receptor protein kinase activity(GO:0019199)	3	26	26	11.5385	100	2.17657	0.0426	0.376428	Egfr|drl|put
Mfuzz Cluster24	biological_process	transmembrane receptor protein serine/threonine kinase signaling pathway(GO:0007178)	4	33	36	12.1212	91.6667	2.63302	0.0222	0.255603	gbb|l(2)gl|opa|put
Mfuzz Cluster24	biological_process	Wnt signaling pathway(GO:0016055)	11	62	63	17.7419	98.4127	5.99791	0	0.0055511	Apc2|CtBP|Wnt2|Wnt5|arr|dx|fz|fz4|nej|nkd|shf
Mfuzz Cluster24	molecular_function	Wnt-activated receptor activity(GO:0042813)	3	5	5	60	100	6.7729	0.0004	0.0102063	arr|fz|fz4
Mfuzz Cluster24	biological_process	wound healing(GO:0042060)	4	41	42	9.7561	97.619	2.1213	0.0348	0.323315	CG10217|Pc|glo|shg
Mfuzz Cluster24	molecular_function	zinc ion binding(GO:0008270)	66	847	905	7.79221	93.5912	6.85041	0	0.0055511	Acf1|Br140|CG10631|CG11696|CG1218|CG12236|CG16863|CG17361|CG2926|CG31365|CG31388|CG31457|CG3800|CG4096|CG4936|CG6791|CG8677|CG8944|CG9797|CTCF|D19A|G9a|IntS12|Mes-4|Mi-2|POSH|Pep|Psc|Sir2|Su(var)3-9|Top3alpha|Zif|aPKC|ap|ash2|az2|bon|cas|chif|chinmo|chm|dah|dwg|dx|east|enok|esn|grn|hang|lola|nej|nkd|opa|ph-d|ph-p|pita|pk|pps|sbb|sob|tou|trx|tsh|wdn|wek|zf30C
Mfuzz Cluster25	biological_process	actin cytoskeleton organization(GO:0030036)	9	107	112	8.41121	95.5357	4.4633	0.0002	0.0632429	Pvr|Vps4|cpa|dia|nuf|rok|siz|sktl|trio
Mfuzz Cluster25	biological_process	actin filament organization(GO:0007015)	6	94	103	6.38298	91.2621	2.82313	0.0098	0.578461	ALiX|Pvr|cpa|dia|hep|sax
Mfuzz Cluster25	cellular_component	adherens junction(GO:0005912)	7	62	66	11.2903	93.9394	4.95225	0.0002	0.0632429	ArfGAP3|by|cnk|dia|kst|rhea|sdt
Mfuzz Cluster25	biological_process	amino acid transmembrane transport(GO:0003333)	5	30	31	16.6667	96.7742	5.46559	0.0002	0.0632429	CG12773|CG13248|CG1607|JhI-21|path
Mfuzz Cluster25	molecular_function	amino acid transmembrane transporter activity(GO:0015171)	5	47	49	10.6383	95.9184	4.00066	0.0018	0.218318	CG12773|CG13248|CG1607|JhI-21|path
Mfuzz Cluster25	biological_process	anatomical structure homeostasis(GO:0060249)	5	57	59	8.77193	96.6102	3.43706	0.004	0.35416	Csk|Irbp|Manf|mre11|rhea
Mfuzz Cluster25	biological_process	anterior/posterior pattern specification(GO:0009952)	3	38	41	7.89474	92.6829	2.43142	0.0326	0.88763	odd|pcs|sax
Mfuzz Cluster25	cellular_component	apical part of cell(GO:0045177)	5	22	22	22.7273	100	6.63386	0.0002	0.0632429	Pez|Ptp10D|cnk|dia|pio
Mfuzz Cluster25	cellular_component	apical plasma membrane(GO:0016324)	4	37	37	10.8108	100	3.62008	0.0048	0.379457	T48|cpa|kst|sdt
Mfuzz Cluster25	cellular_component	apicolateral plasma membrane(GO:0016327)	3	15	15	20	100	4.74952	0.0026	0.264602	kst|scrib|sdt
Mfuzz Cluster25	molecular_function	ARF GTPase activator activity(GO:0008060)	3	9	9	33.3333	100	6.4274	0.0002	0.0632429	ArfGAP3|CG8243|cenB1A
Mfuzz Cluster25	biological_process	axis specification(GO:0009798)	7	116	121	6.03448	95.8678	2.88023	0.0076	0.491171	cactin|cnc|cnk|psq|rok|sax|tub
Mfuzz Cluster25	cellular_component	axon(GO:0030424)	3	36	38	8.33333	94.7368	2.54747	0.0316	0.88763	Catsup|Ptp10D|hep
Mfuzz Cluster25	cellular_component	cell cortex part(GO:0044448)	4	46	55	8.69565	83.6364	3.05031	0.012	0.624988	dia|kst|sano|sdt
Mfuzz Cluster25	cellular_component	cell cortex(GO:0005938)	4	57	58	7.01754	98.2759	2.52439	0.0202	0.721942	Myo31DF|Pez|dia|sktl
Mfuzz Cluster25	biological_process	circadian rhythm(GO:0007623)	4	53	55	7.54717	96.3636	2.69934	0.0168	0.715131	B4|S6kII|cwo|qsm
Mfuzz Cluster25	biological_process	cotranslational protein targeting to membrane(GO:0006613)	3	11	11	27.2727	100	5.72464	0.001	0.17708	CG5885|Gtp-bp|TRAM
Mfuzz Cluster25	biological_process	death(GO:0016265)	7	147	152	4.7619	96.7105	2.17944	0.0252	0.799716	ALiX|Dif|Drep-1|pcs|raw|scyl|sktl
Mfuzz Cluster25	biological_process	determination of adult lifespan(GO:0008340)	7	119	127	5.88235	93.7008	2.80298	0.006	0.431902	Hsp68|Mgat1|S6kII|car|cnc|hep|mthl10
Mfuzz Cluster25	molecular_function	DNA binding(GO:0003677)	25	700	846	3.57143	82.7423	2.65139	0.0108	0.615461	Atf3|CG10949|CG15514|CG34126|CG3726|CG6276|CG9915|Dif|GATAd|H2.0|Hers|His3.3A|His4r|Irbp|Mnt|Ude|Xrp1|ara|cnc|cwo|eyg|psq|ssp|toe|wge
Mfuzz Cluster25	biological_process	dorsal closure(GO:0007391)	5	85	90	5.88235	94.4444	2.36487	0.0192	0.721942	Dab|hep|raw|rok|scrib
Mfuzz Cluster25	biological_process	establishment of tissue polarity(GO:0007164)	5	50	52	10	96.1538	3.8161	0.003	0.295133	frtz|hep|rok|sano|scrib
Mfuzz Cluster25	biological_process	establishment or maintenance of epithelial cell apical/basal polarity(GO:0045197)	4	27	28	14.8148	96.4286	4.5223	0.0024	0.259141	Csk|Vps4|scrib|sdt
Mfuzz Cluster25	biological_process	eye morphogenesis(GO:0048592)	6	88	89	6.81818	98.8764	3.01246	0.0072	0.475737	ArfGAP3|ara|eya|eyg|sax|wls
Mfuzz Cluster25	biological_process	gland morphogenesis(GO:0022612)	5	62	65	8.06452	95.3846	3.20163	0.0064	0.446186	Dif|Pvr|eya|eyg|raw
Mfuzz Cluster25	cellular_component	Golgi membrane(GO:0000139)	4	25	25	16	100	4.75881	0.0016	0.214642	Glg1|Mgat1|beta'Cop|p115
Mfuzz Cluster25	biological_process	Golgi organization(GO:0007030)	4	55	57	7.27273	96.4912	2.60985	0.0194	0.721942	CG5196|Ire1|eca|p115
Mfuzz Cluster25	biological_process	immune effector process(GO:0002252)	3	42	45	7.14286	93.3333	2.22121	0.0466	0.968536	Exn|dia|key
Mfuzz Cluster25	biological_process	immune response(GO:0006955)	9	162	180	5.55556	90	2.98944	0.0048	0.379457	Dif|Exn|Pvr|dia|dnr1|hep|key|norpA|tub
Mfuzz Cluster25	biological_process	maintenance of location in cell(GO:0051651)	8	45	46	17.7778	97.8261	7.21228	0	0.0632429	SsRbeta|by|cnc|dia|rhea|rok|sktl|tankyrase
Mfuzz Cluster25	biological_process	motor neuron axon guidance(GO:0008045)	4	44	45	9.09091	97.7778	3.1635	0.0068	0.456115	Dab|Ptp10D|caps|ko
Mfuzz Cluster25	biological_process	negative regulation of biosynthetic process(GO:0009890)	11	239	251	4.60251	95.2191	2.62071	0.0046	0.377115	Hers|MRG15|Mnt|PEK|cwo|dnr1|eyg|odd|psq|rhea|toe
Mfuzz Cluster25	biological_process	negative regulation of cell fate specification(GO:0009996)	3	19	19	15.7895	100	4.08428	0.005	0.39177	S6kII|eya|lqf
Mfuzz Cluster25	biological_process	negative regulation of cell proliferation(GO:0008285)	4	45	45	8.88889	100	3.10609	0.0074	0.481762	Csk|Pez|Xrp1|scrib
Mfuzz Cluster25	biological_process	negative regulation of growth(GO:0045926)	5	54	56	9.25926	96.4286	3.5916	0.002	0.236107	Csk|Mnt|Vps4|scrib|scyl
Mfuzz Cluster25	cellular_component	neuromuscular junction(GO:0031594)	3	34	35	8.82353	97.1429	2.67217	0.0234	0.764515	Exn|S6kII|scrib
Mfuzz Cluster25	biological_process	nucleosome organization(GO:0034728)	3	31	142	9.67742	21.831	2.87834	0.021	0.721942	His3.3A|His4r|MRG15
Mfuzz Cluster25	biological_process	olfactory behavior(GO:0042048)	5	85	93	5.88235	91.3978	2.36487	0.0284	0.870082	Xrp1|gry|mrt|psq|scrib
Mfuzz Cluster25	biological_process	ovarian follicle cell development(GO:0030707)	4	53	54	7.54717	98.1481	2.69934	0.0196	0.721942	eya|hep|kst|sax
Mfuzz Cluster25	biological_process	ovarian nurse cell to oocyte transport(GO:0007300)	3	13	13	23.0769	100	5.18386	0.0014	0.196756	Catsup|rok|sax
Mfuzz Cluster25	biological_process	peptidyl-tyrosine dephosphorylation(GO:0035335)	4	41	46	9.7561	89.1304	3.34654	0.0086	0.532478	CG42327|Pez|Ptp10D|eya
Mfuzz Cluster25	molecular_function	phospholipid binding(GO:0005543)	11	124	133	8.87097	93.2331	5.1629	0	0.0632429	CG32758|CG34383|CG42668|CG5439|Exn|cenB1A|cnk|kst|rok|siz|trio
Mfuzz Cluster25	biological_process	positive regulation of developmental growth(GO:0048639)	3	39	41	7.69231	95.122	2.37631	0.036	0.88763	sax|ssp|trio
Mfuzz Cluster25	biological_process	post-embryonic morphogenesis(GO:0009886)	24	366	381	6.55738	96.063	5.8825	0	0.0632429	Dif|Hers|Lsd-2|Myo31DF|Pvr|Xrp1|ara|by|caps|cnk|dnr1|eya|hep|l(1)G0007|nuf|odd|pio|psq|rhea|rok|sax|scrib|siz|wls
Mfuzz Cluster25	biological_process	protein acylation(GO:0043543)	3	42	45	7.14286	93.3333	2.22121	0.0446	0.942454	CG5196|CG8314|MRG15
Mfuzz Cluster25	molecular_function	protein binding(GO:0005515)	78	2536	2696	3.07571	94.0653	3.64882	0.002	0.236107	ALiX|Atf3|CG11275|CG13252|CG14647|CG16868|CG16952|CG1968|CG31687|CG32758|CG34383|CG3726|CG42668|CG5439|CG6792|CG7130|CG9945|Csk|Dab|Dif|DnaJ-1|Exn|GstD2|Hsp68|Irbp|Ire1|Lsd-2|MRG15|Mio|Mnt|Myo31DF|Pez|Ptp10D|Pvr|Rep|RhoGAP19D|S6kII|SCAP|Sema-1b|Socs16D|Spt6|Trim9|Ubqn|Wnt6|Xrp1|babos|beta'Cop|by|cactin|caps|car|cenB1A|cnc|cnk|cpa|cwo|dia|dnr1|eya|frtz|hep|key|kst|norpA|nuf|p115|pcs|psq|rhea|rok|s…
Mfuzz Cluster25	biological_process	protein phosphorylation(GO:0006468)	11	241	252	4.56432	95.6349	2.59068	0.0066	0.449511	Csk|Ire1|PEK|Pitslre|Pvr|S6kII|Sik3|hep|rok|sax|wit
Mfuzz Cluster25	molecular_function	protein serine/threonine kinase activity(GO:0004674)	11	186	194	5.91398	95.8763	3.54619	0.0008	0.150706	Irbp|Ire1|PEK|Pitslre|S6kII|Sik3|hep|key|rok|sax|wit
Mfuzz Cluster25	molecular_function	protein tyrosine phosphatase activity(GO:0004725)	4	37	42	10.8108	88.0952	3.62008	0.006	0.431902	CG42327|Pez|Ptp10D|eya
Mfuzz Cluster25	biological_process	Ras protein signal transduction(GO:0007265)	3	24	26	12.5	92.3077	3.48293	0.0124	0.626139	cnk|rok|trio
Mfuzz Cluster25	biological_process	regulation of ARF GTPase activity(GO:0032312)	3	8	8	37.5	100	6.86956	0	0.0632429	ArfGAP3|CG8243|cenB1A
Mfuzz Cluster25	biological_process	regulation of cell morphogenesis(GO:0022604)	9	144	148	6.25	97.2973	3.39263	0.0018	0.218318	His3.3A|Pitslre|Pvr|babos|dia|raw|rhea|rok|trio
Mfuzz Cluster25	biological_process	regulation of cell projection organization(GO:0031344)	4	60	62	6.66667	96.7742	2.40306	0.027	0.8388	babos|cpa|rok|trio
Mfuzz Cluster25	biological_process	regulation of cellular amide metabolic process(GO:0034248)	5	38	40	13.1579	95	4.66485	0.0008	0.150706	Dif|Spt6|dnr1|key|scrib
Mfuzz Cluster25	biological_process	regulation of defense response(GO:0031347)	5	41	42	12.1951	97.619	4.42178	0.0008	0.150706	Dif|Spn77Ba|dnr1|key|scrib
Mfuzz Cluster25	biological_process	regulation of immune system process(GO:0002682)	8	81	83	9.87654	97.5904	4.78806	0.0004	0.114245	Dif|Pvr|Spn77Ba|Spt6|dnr1|hep|key|scrib
Mfuzz Cluster25	biological_process	regulation of localization(GO:0032879)	12	194	209	6.18557	92.823	3.8856	0.0006	0.147567	Catsup|Exn|Gtp-bp|Lsd-2|S6kII|beta'Cop|cnc|eca|norpA|rok|scrib|wls
Mfuzz Cluster25	biological_process	regulation of multicellular organismal development(GO:2000026)	13	302	311	4.30464	97.1061	2.59434	0.0062	0.439158	Catsup|S6kII|babos|cnc|dia|lqf|norpA|raw|rok|sax|scrib|ssp|trio
Mfuzz Cluster25	biological_process	regulation of Ras protein signal transduction(GO:0046578)	4	52	55	7.69231	94.5455	2.74572	0.0182	0.721942	Exn|S6kII|siz|trio
Mfuzz Cluster25	biological_process	regulation of stress-activated protein kinase signaling cascade(GO:0070302)	3	38	38	7.89474	100	2.43142	0.0338	0.88763	ALiX|hep|raw
Mfuzz Cluster25	UserSuppliedAssociations	Salm core genes (Spletter et al 2015)	22	710	742	3.09859	95.6873	2.81691	0.0202	0.0993167	ALiX|B4|CG10103|CG1021|CG4025|CG5174|CG6287|CG9425|Dif|Exn|FBgn0266450|Hmu|Ubqn|cnc|pio|psq|rgn|rhea|scrib|sdt|trio|twr
Mfuzz Cluster25	cellular_component	signal peptidase complex(GO:0005787)	3	3	4	100	75	11.6446	0	0.0632429	Spase22-23|Spase25|twr
Mfuzz Cluster25	biological_process	signal peptide processing(GO:0006465)	3	3	4	100	75	11.6446	0	0.0632429	Spase22-23|Spase25|twr
Mfuzz Cluster25	biological_process	tissue development(GO:0009888)	12	273	280	4.3956	97.5	2.56765	0.0072	0.475737	B4|Myo31DF|Pvr|cpa|eca|eya|eyg|pcs|rgn|rok|scrib|tankyrase
Mfuzz Cluster25	biological_process	Toll signaling pathway(GO:0008063)	3	34	36	8.82353	94.4444	2.67217	0.0258	0.810047	Dif|key|tub
Mfuzz Cluster25	UserSuppliedAssociations	transcription_factors	25	732	754	3.4153	97.0822	3.54163	0.004	0.0337143	Atf3|CG10949|CG11398|CG15514|CG3726|CG3847|CG5196|CG6276|CG6792|CG8314|Dif|FBgn0266450|GATAd|H2.0|Irbp|Mio|Mnt|Xrp1|ara|cnc|cwo|eyg|odd|psq|toe
Mfuzz Cluster25	molecular_function	transmembrane receptor protein kinase activity(GO:0019199)	3	26	26	11.5385	100	3.2882	0.0156	0.694082	Pvr|sax|wit
Mfuzz Cluster25	biological_process	vesicle organization(GO:0016050)	3	38	41	7.89474	92.6829	2.43142	0.0414	0.909567	beta'Cop|car|p115
Mfuzz Cluster25	UserSuppliedAssociations	WTvssalm_99hAPF_log2FC>2	17	448	448	3.79464	100	3.3526	0.0054	0.039825	CG5326|CR41609|FBgn0267516|ara|snRNA:U2:34ABa|snoRNA:2R:9445205|snoRNA:MeU5-C46|snoRNA:Or-CD1|snoRNA:Or-aca5|snoRNA:Psi18S-1377e|snoRNA:Psi18S-1820|snoRNA:Psi18S-920|snoRNA:Psi28S-1192c|snoRNA:Psi28S-1837b|snoRNA:Psi28S-2566|snoRNA:SC35-a|unsRNA:CG10576-a
Mfuzz Cluster25	biological_process	zonula adherens assembly(GO:0045186)	3	10	10	30	100	6.05081	0.0014	0.196756	kst|scrib|sdt
Mfuzz Cluster26	biological_process	adaptation of signaling pathway(GO:0023058)	3	4	4	75	100	12.4703	0	0.0402455	Arr2|inaC|ninaC
Mfuzz Cluster26	biological_process	alpha-amino acid catabolic process(GO:1901606)	4	26	29	15.3846	89.6552	6.04299	0.0004	0.0722776	CG6415|Hn|hgo|v
Mfuzz Cluster26	biological_process	aromatic amino acid family catabolic process(GO:0009074)	3	5	6	60	83.3333	11.1008	0	0.0402455	Hn|hgo|v
Mfuzz Cluster26	biological_process	calcium-mediated signaling(GO:0019722)	3	7	9	42.8571	77.7778	9.29226	0	0.0402455	inaC|trp|trpl
Mfuzz Cluster26	molecular_function	calmodulin binding(GO:0005516)	4	26	29	15.3846	89.6552	6.04299	0.001	0.132149	inaD|ninaC|trp|trpl
Mfuzz Cluster26	molecular_function	carbohydrate binding(GO:0030246)	5	94	116	5.31915	81.0345	3.22329	0.0106	0.788676	CG15358|CG6055|Clect27|lectin-46Ca|lectin-46Cb
Mfuzz Cluster26	biological_process	cellular response to light stimulus(GO:0071482)	4	20	23	20	86.9565	7.04877	0	0.0402455	Gbeta76C|PIP82|Rh3|ninaC
Mfuzz Cluster26	biological_process	chitin-based cuticle development(GO:0040003)	3	57	72	5.26316	79.1667	2.4694	0.0446	1	TwdlBeta|TwdlG|drd
Mfuzz Cluster26	biological_process	deactivation of rhodopsin mediated signaling(GO:0016059)	6	13	14	46.1538	92.8571	13.6746	0	0.0402455	Arr1|Arr2|Gbeta76C|inaC|inaD|ninaC
Mfuzz Cluster26	biological_process	detection of light stimulus involved in sensory perception(GO:0050962)	3	9	9	33.3333	100	8.11597	0.0002	0.0402455	inaC|inaD|trp
Mfuzz Cluster26	cellular_component	extracellular space(GO:0005615)	8	192	306	4.16667	62.7451	3.26363	0.0056	0.533144	Acp32CD|Acp53C14b|CG13965|CG17575|CG9029|Mst57Da|lectin-46Ca|lectin-46Cb
Mfuzz Cluster26	biological_process	eye pigment biosynthetic process(GO:0006726)	3	29	32	10.3448	90.625	4.08055	0.01	0.780353	Hn|se|v
Mfuzz Cluster26	molecular_function	G-protein coupled photoreceptor activity(GO:0008020)	3	8	8	37.5	100	8.6502	0	0.0402455	Rh3|Rh5|ninaE
Mfuzz Cluster26	biological_process	G-protein coupled receptor signaling pathway(GO:0007186)	8	172	189	4.65116	91.0053	3.62882	0.0028	0.291661	Dms|Gbeta76C|Rh3|Rh5|inaC|mthl1|ninaE|trp
Mfuzz Cluster26	molecular_function	glutathione transferase activity(GO:0004364)	3	35	36	8.57143	97.2222	3.59384	0.0142	0.833318	CG17639|CG33177|se
Mfuzz Cluster26	molecular_function	hydrolase activity, hydrolyzing O-glycosyl compounds(GO:0004553)	4	95	100	4.21053	95	2.32078	0.0456	1	CG31414|CG8492|LysS|fdl
Mfuzz Cluster26	UserSuppliedAssociations	IFM72vs30h_log2FC>2	137	1537	1537	8.91347	100	22.8659	0	0.03304	Acp53C14b|Acp65Aa|Ance-2|Arr2|CG10257|CG10268|CG10280|CG10598|CG10953|CG12964|CG13046|CG13047|CG13048|CG13049|CG13062|CG13065|CG13066|CG13071|CG13217|CG13231|CG13308|CG13566|CG13699|CG13721|CG13731|CG14095|CG14147|CG14191|CG14329|CG14570|CG14607|CG14961|CG15212|CG15358|CG15650|CG16721|CG17575|CG17600|CG17639|CG18367|CG2157|CG2837|CG30195|CG30196|CG30457|CG32213|CG32548|CG33177|CG34205|CG34445|CG4…
Mfuzz Cluster26	biological_process	imaginal disc-derived wing vein morphogenesis(GO:0008586)	3	41	41	7.31707	100	3.20907	0.0156	0.853007	hipk|salm|vn
Mfuzz Cluster26	cellular_component	inaD signaling complex(GO:0016027)	6	9	10	66.6667	90	16.5913	0	0.0402455	inaC|inaD|ninaC|ninaE|trp|trpl
Mfuzz Cluster26	molecular_function	ligand-gated channel activity(GO:0022834)	4	72	118	5.55556	61.0169	2.98841	0.0192	0.960434	GluRIIE|KaiRIA|trp|trpl
Mfuzz Cluster26	biological_process	multicellular organism reproduction(GO:0032504)	8	93	177	8.60215	52.5424	5.90061	0	0.0402455	Acp32CD|Acp53C14b|CG13965|CG17575|CG9029|Mst57Da|lectin-46Ca|lectin-46Cb
Mfuzz Cluster26	molecular_function	oxidoreductase activity, acting on CH-OH group of donors(GO:0016614)	5	112	121	4.46429	92.562	2.75085	0.0224	1	CG40486|CG4842|CG8757|CG8888|Pdh
Mfuzz Cluster26	biological_process	phototransduction(GO:0007602)	10	38	42	26.3158	90.4762	13.0294	0	0.0402455	Arr1|Arr2|Gbeta76C|Rh3|Rh5|inaC|inaD|ninaC|ninaE|trp
Mfuzz Cluster26	cellular_component	plasma membrane(GO:0005886)	11	370	395	2.97297	93.6709	2.59008	0.0158	0.853007	Fps85D|Gbeta76C|Ptr|fdl|inaC|inaD|l(3)mbn|ninaE|trp|trpl|vn
Mfuzz Cluster26	biological_process	protein-chromophore linkage(GO:0018298)	3	7	7	42.8571	100	9.29226	0	0.0402455	Rh3|Rh5|ninaE
Mfuzz Cluster26	cellular_component	proteinaceous extracellular matrix(GO:0005578)	4	42	55	9.52381	76.3636	4.46222	0.002	0.227026	TwdlBeta|TwdlG|mspo|prc
Mfuzz Cluster26	biological_process	regulation of female receptivity, post-mating(GO:0046008)	4	11	15	36.3636	73.3333	9.82533	0	0.0402455	Acp32CD|CG17575|lectin-46Ca|lectin-46Cb
Mfuzz Cluster26	biological_process	rhabdomere development(GO:0042052)	3	24	26	12.5	92.3077	4.60672	0.0042	0.413187	Cpn|ninaE|prom
Mfuzz Cluster26	cellular_component	rhabdomere(GO:0016028)	11	21	26	52.381	80.7692	19.8071	0	0.0402455	Arr1|Arr2|Gbeta76C|Rh5|inaC|inaD|ninaC|ninaE|rtp|trp|trpl
Mfuzz Cluster26	biological_process	sperm competition(GO:0046692)	3	11	14	27.2727	78.5714	7.26968	0.0004	0.0722776	CG17575|lectin-46Ca|lectin-46Cb
Mfuzz Cluster26	molecular_function	structural constituent of chitin-based cuticle(GO:0005214)	26	107	139	24.2991	76.9784	20.1632	0	0.0402455	Acp65Aa|Ccp84Aa|Ccp84Ac|Cpr11B|Cpr30B|Cpr30F|Cpr47Ea|Cpr49Aa|Cpr49Ab|Cpr49Ae|Cpr50Cb|Cpr64Aa|Cpr64Ab|Cpr64Ac|Cpr65Av|Cpr65Ea|Cpr72Ec|Cpr76Bb|Cpr92A|Cry|Lcp65Ac|Lcp65Ag2|TwdlBeta|TwdlG|l(3)mbn|resilin
Mfuzz Cluster26	biological_process	visual perception(GO:0007601)	3	14	15	21.4286	93.3333	6.34879	0.0006	0.0983778	Rh3|Rh5|ninaE
Mfuzz Cluster27	biological_process	anatomical structure formation involved in morphogenesis(GO:0048646)	12	313	349	3.83387	89.6848	2.06122	0.0354	0.883235	Fs(2)Ket|Kr|Lasp|NetB|ci|cta|exd|gus|hbs|mbc|osm-6|twi
Mfuzz Cluster27	biological_process	apoptotic process(GO:0006915)	5	57	59	8.77193	96.6102	3.43706	0.0068	0.449307	Alg-2|Cas|Pten|rpr|skl
Mfuzz Cluster27	biological_process	biological adhesion(GO:0022610)	8	173	189	4.62428	91.5344	2.24201	0.024	0.685471	Psn|Pten|Sgs1|Sgs3|Zyx|alpha-Cat|alphaPS4|hbs
Mfuzz Cluster27	biological_process	brain development(GO:0007420)	3	38	38	7.89474	100	2.43142	0.0394	0.883235	Rx|cib|exd
Mfuzz Cluster27	biological_process	cell cycle comprising mitosis without cytokinesis(GO:0033301)	4	16	17	25	94.1176	6.28079	0	0.0478595	BubR1|Ctf4|CycA|CycB
Mfuzz Cluster27	cellular_component	cell-substrate junction(GO:0030055)	3	23	25	13.0435	92	3.58871	0.01	0.549938	Lasp|Zyx|alpha-Cat
Mfuzz Cluster27	biological_process	cellular response to DNA damage stimulus(GO:0006974)	10	232	246	4.31034	94.3089	2.27174	0.0196	0.64012	CG12018|CG12728|CycB|Fancl|Gen|Msh6|Tango6|me31B|rl|rpr
Mfuzz Cluster27	biological_process	chromatin organization(GO:0006325)	8	149	267	5.36913	55.8052	2.70756	0.0096	0.548377	CG2051|Dcr-2|Hcf|Mcm10|Nipped-B|Set1|borr|escl
Mfuzz Cluster27	cellular_component	chromosomal part(GO:0044427)	20	246	369	8.13008	66.6667	6.50895	0	0.0478595	BubR1|CG12018|CycB|DNApol-alpha50|HP5|Kmn1|Nipped-A|Nipped-B|Nnf1a|Parp|Rbf2|RfC3|SA|Set1|Spc105R|borr|c(3)G|mad2|mei-P22|pho
Mfuzz Cluster27	biological_process	chromosome organization(GO:0051276)	10	144	149	6.94444	96.6443	3.96937	0.0004	0.08854	BubR1|CycA|Mcm10|Nipped-B|Parp|Spc105R|mus301|pho|pim|tef
Mfuzz Cluster27	biological_process	chromosome segregation(GO:0007059)	9	94	98	9.57447	95.9184	4.9592	0.0002	0.0478595	BubR1|CycA|Kmn1|Mcm10|Nnf1a|RanGap|mus301|pim|tef
Mfuzz Cluster27	biological_process	cytokinesis(GO:0000910)	5	78	85	6.41026	91.7647	2.5862	0.0174	0.64012	CycB|Nipped-A|Tl|borr|pim
Mfuzz Cluster27	cellular_component	cytoplasm(GO:0005737)	24	727	776	3.30124	93.6856	2.18614	0.0314	0.820105	BubR1|CG33276|Cas|CkIIalpha|CycA|CycB|Dcr-2|Fs(2)Ket|Nipped-A|Psn|RanGap|ci|cib|csul|dgrn|exd|l(2)NC136|mad2|mbc|me31B|pim|rl|rpr|twi
Mfuzz Cluster27	molecular_function	DNA binding(GO:0003677)	28	700	846	4	82.7423	3.45932	0.001	0.17708	Abd-B|CG10445|CG12018|CG13775|CG14050|CG7376|Ctf4|Gen|HmgZ|Kr|MED26|Msh6|NK7.1|Parp|Rbf2|RfC3|RpII140|Rx|Taf13|bab1|ci|dan|exd|hbn|lms|mms4|pho|twi
Mfuzz Cluster27	biological_process	DNA metabolic process(GO:0006259)	16	231	244	6.92641	94.6721	5.03077	0	0.0478595	CG12018|CG12728|Ctf4|DNApol-alpha50|Fancl|Gen|Mcm10|Msh6|Pol32|RfC3|WRNexo|c(3)G|mei-P22|mms4|pho|pim
Mfuzz Cluster27	biological_process	embryonic axis specification(GO:0000578)	5	52	55	9.61538	94.5455	3.70101	0.0024	0.258656	Abd-B|Kr|Tl|drk|rl
Mfuzz Cluster27	molecular_function	endoribonuclease activity(GO:0004521)	3	21	22	14.2857	95.4545	3.82033	0.0088	0.50925	CG31812|CG7741|Dcr-2
Mfuzz Cluster27	biological_process	establishment of chromosome localization(GO:0051303)	3	17	18	17.6471	94.4444	4.38963	0.0054	0.401778	CycB|Kmn1|Nnf1a
Mfuzz Cluster27	biological_process	G2/M transition of mitotic cell cycle(GO:0000086)	3	8	8	37.5	100	6.86956	0.0006	0.115487	CycA|CycB|cdc2c
Mfuzz Cluster27	biological_process	gastrulation(GO:0007369)	3	29	32	10.3448	90.625	3.03096	0.021	0.64012	cta|rl|twi
Mfuzz Cluster27	biological_process	heart development(GO:0007507)	4	61	61	6.55738	100	2.3643	0.033	0.849575	Abd-B|Tl|rl|twi
Mfuzz Cluster27	molecular_function	helicase activity(GO:0004386)	7	105	112	6.66667	93.75	3.18619	0.0074	0.467997	CG10445|CG7376|Dbp80|Dcr-2|me31B|mus301|pea
Mfuzz Cluster27	biological_process	imaginal disc pattern formation(GO:0007447)	5	93	97	5.37634	95.8763	2.13781	0.043	0.89787	Abd-B|Nipped-A|Psn|ci|exd
Mfuzz Cluster27	biological_process	maintenance of protein location in cell(GO:0032507)	3	40	41	7.5	97.561	2.32296	0.0488	0.973142	CycB|Parp|alpha-Cat
Mfuzz Cluster27	biological_process	meiotic cell cycle process(GO:1903046)	8	115	123	6.95652	93.4959	3.55096	0.0026	0.258656	BubR1|Mcm10|Msh6|RanGap|c(3)G|mei-P22|mus301|tef
Mfuzz Cluster27	biological_process	metamorphosis(GO:0007552)	3	31	34	9.67742	91.1765	2.87834	0.0224	0.658902	Parp|Pten|rl
Mfuzz Cluster27	UserSuppliedAssociations	microtubule_associated	17	512	519	3.32031	98.6513	2.62796	0.0268	0.152327	CG11120|CG11905|CG12018|CG17493|CG17528|CycB|FBgn0266521|Fs(2)Ket|Nipped-A|RfC3|SA|borr|cdc2c|mad2|me31B|osm-6|wac
Mfuzz Cluster27	biological_process	mitotic cell cycle phase(GO:0098763)	4	31	33	12.9032	93.9394	4.11428	0.003	0.288717	CycB|Kmn1|borr|pim
Mfuzz Cluster27	biological_process	mitotic cell cycle, embryonic(GO:0045448)	5	25	26	20	96.1538	6.13469	0	0.0478595	BubR1|Ctf4|CycA|CycB|borr
Mfuzz Cluster27	biological_process	negative regulation of chromosome segregation(GO:0051985)	3	12	12	25	100	5.43823	0.0012	0.180081	BubR1|CycA|mad2
Mfuzz Cluster27	biological_process	negative regulation of metaphase/anaphase transition of cell cycle(GO:1902100)	3	12	12	25	100	5.43823	0.0012	0.180081	BubR1|CycA|mad2
Mfuzz Cluster27	biological_process	Notch signaling pathway(GO:0007219)	4	44	46	9.09091	95.6522	3.1635	0.0122	0.590267	Psn|aph-1|m6|nct
Mfuzz Cluster27	biological_process	nuclear division(GO:0000280)	10	157	166	6.36943	94.5783	3.64844	0.0016	0.208329	BubR1|CG3436|CkIIalpha|CycA|Fs(2)Ket|borr|csul|rl|tef|wac
Mfuzz Cluster27	molecular_function	nucleic acid binding transcription factor activity(GO:0001071)	17	422	443	4.02844	95.2596	2.6876	0.0058	0.417506	Abd-B|Hcf|Kr|MED26|NK7.1|Rbf2|Rx|Taf13|bab1|ci|d4|dan|exd|hbn|lms|pho|twi
Mfuzz Cluster27	biological_process	nucleic acid phosphodiester bond hydrolysis(GO:0090305)	6	58	59	10.3448	98.3051	4.29269	0.0006	0.115487	CG31812|Dcr-2|Gen|WRNexo|mei-P22|mms4
Mfuzz Cluster27	cellular_component	nucleus(GO:0005634)	48	1254	1407	3.82775	89.1258	4.32666	0	0.0478595	Abd-B|CG10445|CG11360|CG12728|CG13599|CG2051|CG31111|CG4854|CG6808|CG8319|Cas|CkIIalpha|CycA|CycB|Dcr-2|Gen|Hcf|HmgZ|Kr|MED21|MED26|Mcm10|NK7.1|Nipped-A|Nipped-B|Parp|Pol32|Rbf2|Rx|SA|Set1|Sgf29|bab1|bip2|ci|d4|dan|dgrn|exd|hbn|l(2)NC136|lms|mad2|pea|pho|pim|rl|twi
Mfuzz Cluster27	biological_process	peptidyl-lysine modification(GO:0018205)	4	46	47	8.69565	97.8723	3.05031	0.012	0.590267	CG2051|Hcf|Set1|escl
Mfuzz Cluster27	biological_process	positive regulation of cell differentiation(GO:0045597)	4	28	28	14.2857	100	4.41288	0.0018	0.22135	Lasp|ci|drk|rl
Mfuzz Cluster27	biological_process	positive regulation of metabolic process(GO:0009893)	14	382	396	3.66492	96.4646	2.05394	0.037	0.883235	Abd-B|Alg-2|Hcf|Nipped-B|Parp|RanGap|Tl|aph-1|bip2|ci|dgrn|exd|mbc|twi
Mfuzz Cluster27	biological_process	positive regulation of multi-organism process(GO:0043902)	3	31	32	9.67742	96.875	2.87834	0.0262	0.718188	Lasp|Parp|Tl
Mfuzz Cluster27	biological_process	protein alkylation(GO:0008213)	3	37	39	8.10811	94.8718	2.48844	0.0384	0.883235	Set1|csul|escl
Mfuzz Cluster27	molecular_function	protein domain specific binding(GO:0019904)	4	43	43	9.30233	100	3.22265	0.0108	0.569186	CHIP|Pten|Tl|bip2
Mfuzz Cluster27	molecular_function	protein kinase binding(GO:0019901)	3	25	26	12	96.1538	3.38294	0.015	0.64012	CycA|CycB|rl
Mfuzz Cluster27	molecular_function	protein methyltransferase activity(GO:0008276)	3	30	32	10	93.75	2.95297	0.0256	0.71054	Set1|csul|escl
Mfuzz Cluster27	biological_process	protein phosphorylation(GO:0006468)	13	241	252	5.39419	95.6349	3.48673	0.0018	0.22135	BubR1|CG17528|CkIIalpha|Dyrk3|Gprk1|Haspin|Hsp67Bc|Pka-C3|Ror|borr|cdc2c|png|rl
Mfuzz Cluster27	molecular_function	protein serine/threonine kinase activity(GO:0004674)	10	186	194	5.37634	95.8763	3.03764	0.0046	0.357267	BubR1|CG17528|CkIIalpha|Dyrk3|Gprk1|Haspin|Pka-C3|cdc2c|png|rl
Mfuzz Cluster27	biological_process	protein ubiquitination(GO:0016567)	5	42	48	11.9048	87.5	4.34604	0.0016	0.208329	CHIP|Fancl|Roc2|dgrn|rpr
Mfuzz Cluster27	biological_process	regulation of binding(GO:0051098)	3	11	11	27.2727	100	5.72464	0.0012	0.180081	CycA|CycB|dgrn
Mfuzz Cluster27	biological_process	regulation of exit from mitosis(GO:0007096)	4	11	11	36.3636	100	7.79739	0.0002	0.0478595	BubR1|CG13599|CycA|Rpn9
Mfuzz Cluster27	biological_process	regulation of gene expression(GO:0010468)	37	936	987	3.95299	94.8328	3.94825	0	0.0478595	Abd-B|CG10445|CG11360|CG2051|CkIIalpha|Dcr-2|Hcf|Hsp67Bc|Kr|MED21|Mcm10|NK7.1|Nipped-A|Nipped-B|Parp|Pten|Rbf2|Rrp47|Rx|bab1|bip2|ci|d4|dan|dgrn|drk|e(r)|exd|hbn|l(2)NC136|lms|mus301|pea|pho|rl|rpr|twi
Mfuzz Cluster27	biological_process	regulation of macromolecule biosynthetic process(GO:0010556)	32	785	825	4.07643	95.1515	3.83352	0	0.0478595	Abd-B|CG2051|CkIIalpha|Dcr-2|Hcf|Hsp67Bc|Kr|MED21|Mcm10|NK7.1|Nipped-A|Nipped-B|Parp|Rbf2|Rx|bab1|bip2|ci|d4|dan|dgrn|drk|e(r)|exd|hbn|l(2)NC136|lms|mus301|pho|rl|rpr|twi
Mfuzz Cluster27	biological_process	regulation of muscle tissue development(GO:1901861)	3	8	8	37.5	100	6.86956	0	0.0478595	Abd-B|hbs|twi
Mfuzz Cluster27	biological_process	regulation of nucleobase-containing compound metabolic process(GO:0019219)	34	806	847	4.21836	95.1594	4.17766	0	0.0478595	Abd-B|CG10445|CG11360|CG2051|CkIIalpha|Dcr-2|Hcf|Kr|MED21|Mcm10|Msh6|NK7.1|Nipped-A|Nipped-B|Parp|Rbf2|Rx|WRNexo|bab1|bip2|ci|d4|dan|dgrn|drk|e(r)|exd|hbn|l(2)NC136|lms|pea|pho|rl|twi
Mfuzz Cluster27	biological_process	regulation of photoreceptor cell differentiation(GO:0046532)	3	27	28	11.1111	96.4286	3.19823	0.0136	0.626591	drk|nct|rl
Mfuzz Cluster27	biological_process	renal tubule morphogenesis(GO:0061333)	3	32	33	9.375	96.9697	2.80681	0.0248	0.699297	Kr|pim|twi
Mfuzz Cluster27	biological_process	RNA biosynthetic process(GO:0032774)	8	161	168	4.96894	95.8333	2.46446	0.0176	0.64012	DNApol-alpha50|MED21|MED26|Parp|RpII140|Taf13|bab1|l(2)NC136
Mfuzz Cluster27	molecular_function	RNA-dependent ATPase activity(GO:0008186)	3	39	41	7.69231	95.122	2.37631	0.039	0.883235	Dbp80|me31B|pea
Mfuzz Cluster27	cellular_component	transferase complex(GO:1990234)	18	195	209	9.23077	93.3014	6.8465	0	0.0478595	CG12018|CG4050|CHIP|CycA|CycB|Eaf6|Hcf|MED21|Nipped-A|Pka-C3|Roc2|RpII140|Set1|Sgf29|Skp2|dgrn|escl|l(2)k12914
Mfuzz Cluster27	UserSuppliedAssociations	WTvssalm_30hAPF_log2FC<-2	16	471	471	3.39703	100	2.64285	0.0316	0.155367	CG17977|CG30466|CG32641|CG33977|CG43647|CR43785|FBgn0264821|GstD6|GstD7|Lasp|Nipped-A|Pten|Zyx|ci|pncr013:4|rl
Mfuzz Cluster27	UserSuppliedAssociations	WTvssalm_99hAPF_log2FC<-2	28	842	842	3.32542	100	3.44461	0.0062	0.07316	Abd-B|CG11905|CG12112|CG13936|CG14050|CG1667|CG16734|CG30051|CG30187|CG31111|CG32791|CG33107|CG33977|CG42254|CG43062|CG5708|CG7637|CG9021|CG9669|CG9760|CycA|Fancl|GstD6|Pka-C3|Spc105R|c(3)G|mad2|mei-P22
Mfuzz Cluster28	molecular_function	acyl-CoA dehydrogenase activity(GO:0003995)	4	13	15	30.7692	86.6667	6.91131	0	0.0421619	Arc42|CG6638|CG9527|Egm
Mfuzz Cluster28	biological_process	cellular metal ion homeostasis(GO:0006875)	3	25	26	12	96.1538	3.27522	0.0118	0.863448	PMCA|Scox|fh
Mfuzz Cluster28	biological_process	cofactor biosynthetic process(GO:0051188)	4	55	60	7.27273	91.6667	2.50267	0.0188	0.8854	CG3156|CG9940|Ppat-Dpck|Updo
Mfuzz Cluster28	molecular_function	flavin adenine dinucleotide binding(GO:0050660)	4	56	61	7.14286	91.8033	2.45995	0.0232	0.904902	Arc42|CG6638|CG9527|Egm
Mfuzz Cluster28	biological_process	guanosine-containing compound catabolic process(GO:1901069)	4	35	38	11.4286	92.1053	3.64965	0.0068	0.620693	CG13375|Mesh1|Rgk3|Rheb
Mfuzz Cluster28	molecular_function	histone deacetylase binding(GO:0042826)	4	14	14	28.5714	100	6.61952	0.0002	0.0421619	CG18136|CG7759|CG8503|Smyd4
Mfuzz Cluster28	molecular_function	hydrolase activity, acting on ester bonds(GO:0016788)	17	397	438	4.28212	90.6393	2.75612	0.0026	0.371297	CG10214|CG12237|CG17028|CG18643|CG2862|CG31156|CG3160|CG6567|CG6656|CG6847|EndoG|Mesh1|Pdp|PpV|alpha-Est10|mRNA-cap|mRpL44
Mfuzz Cluster28	UserSuppliedAssociations	IFM72vs30h_log2FC>2	59	1537	1537	3.83865	100	4.11088	0.0012	0.00372632	Acp1|CG1041|CG1136|CG11760|CG12520|CG13634|CG14270|CG14410|CG14636|CG14752|CG14881|CG15908|CG16820|CG16935|CG2003|CG31229|CG31648|CG33506|CG3420|CG34200|CG34250|CG34357|CG42322|CG4627|CG4957|CG5131|CG6847|CG7506|CG7777|CG8503|CcapR|Cralbp|Cyp12e1|Cyp301a1|Dhpr|ECSIT|EF-G2|ETHR|FBgn0267230|Fit2|Mlp84B|RIC-3|Rgk3|Scp1|alpha-Est10|clumsy|dyl|mRpL14|mRpL2|mRpL23|mRpL24|mRpL32|mRpL40|mRpL41|mRpL44|mRp…
Mfuzz Cluster28	cellular_component	intrinsic component of organelle membrane(GO:0031300)	3	40	44	7.5	90.9091	2.22947	0.043	1	CG3160|CG7506|MAN1
Mfuzz Cluster28	molecular_function	ligase activity(GO:0016874)	8	171	182	4.67836	93.956	2.13913	0.0194	0.8854	CG16912|CG5463|CG7441|CG9153|CG9940|Uev1A|eff|lig3
Mfuzz Cluster28	biological_process	macromolecular complex disassembly(GO:0032984)	3	18	19	16.6667	94.7368	4.10993	0.0038	0.460893	CG5705|CG6094|EF-G2
Mfuzz Cluster28	molecular_function	metalloendopeptidase activity(GO:0004222)	6	74	82	8.10811	90.2439	3.39047	0.0032	0.422878	CG11771|CG14231|CG2658|CG5131|CG8728|Ide
Mfuzz Cluster28	cellular_component	mitochondrial inner membrane presequence translocase complex(GO:0005744)	3	11	13	27.2727	84.6154	5.57707	0.0008	0.136215	CG11779|CG31229|Tim8
Mfuzz Cluster28	cellular_component	mitochondrial large ribosomal subunit(GO:0005762)	21	47	47	44.6809	100	19.5884	0	0.0421619	Rlc1|mRpL1|mRpL12|mRpL13|mRpL14|mRpL2|mRpL20|mRpL23|mRpL24|mRpL32|mRpL38|mRpL40|mRpL41|mRpL44|mRpL46|mRpL48|mRpL49|mRpL50|mRpL51|mRpL54|mRpS24
Mfuzz Cluster28	cellular_component	mitochondrial membrane(GO:0031966)	8	79	88	10.1266	89.7727	4.71452	0.0002	0.0421619	CG3156|CG31648|CG6404|CG8004|EndoG|Scox|mge|porin
Mfuzz Cluster28	cellular_component	mitochondrial small ribosomal subunit(GO:0005763)	14	30	30	46.6667	100	16.3686	0	0.0421619	bonsai|mRpL12|mRpS11|mRpS18A|mRpS22|mRpS24|mRpS25|mRpS28|mRpS30|mRpS31|mRpS33|mRpS6|mRpS7|mRpS9
Mfuzz Cluster28	biological_process	mitochondrial transport(GO:0006839)	7	48	53	14.5833	90.566	5.74926	0.0002	0.0421619	CG11779|CG31229|CG3156|CG8004|Tim17b|Tim8|porin
Mfuzz Cluster28	biological_process	mitochondrion organization(GO:0007005)	8	48	57	16.6667	84.2105	6.72162	0	0.0421619	EndoG|P5CDh1|Tim8|mRpL12|opa1-like|porin|rho-7|ttm50
Mfuzz Cluster28	cellular_component	mitochondrion(GO:0005739)	30	254	269	11.811	94.4238	10.3569	0	0.0421619	CG10214|CG1041|CG14898|CG16912|CG16935|CG2658|CG34423|CG5190|CG5463|CG5705|Cyp12e1|Cyp301a1|EF-G2|EndoG|Mtch|P5CDh1|Pdp|Scox|Tim17b|beg|bonsai|fh|ico|mRpL1|mRpL50|mRpS30|mge|mtRNApol|porin|ttm50
Mfuzz Cluster28	UserSuppliedAssociations	MitoExplorer_all genes	120	1002	1065	11.976	94.0845	21.0874	0	0.0007375	Arc42|CG10195|CG10214|CG1041|CG10639|CG11562|CG11771|CG11779|CG12375|CG13601|CG13630|CG13850|CG14231|CG14270|CG14450|CG1458|CG14613|CG14786|CG14898|CG15738|CG15908|CG16787|CG16912|CG16935|CG1750|CG18094|CG2107|CG2453|CG2658|CG2862|CG3021|CG31229|CG3156|CG31648|CG3420|CG34423|CG4495|CG4627|CG4957|CG5190|CG5463|CG5705|CG5844|CG6094|CG6404|CG6638|CG6656|CG7175|CG7441|CG7506|CG8004|CG8078|CG8298|CG83…
Mfuzz Cluster28	UserSuppliedAssociations	MitoExplorer_Amino_Acid_Metabolism	4	58	63	6.89655	92.0635	2.26797	0.0276	0.0603111	CG6638|Dhpr|P5CDh1|nrm
Mfuzz Cluster28	UserSuppliedAssociations	MitoExplorer_Apoptosis	4	45	47	8.88889	95.7447	2.87603	0.0104	0.0236	CG2862|Mtch|porin|rho-7
Mfuzz Cluster28	UserSuppliedAssociations	MitoExplorer_Electron_Transport_Chain	16	186	192	8.60215	96.875	5.63145	0	0.0007375	CG11562|CG13850|CG1458|CG14898|CG15738|CG15908|CG31648|CG3420|CG34423|CG4627|CG6404|CG7506|ECSIT|Egm|Scox|l(2)37Bb
Mfuzz Cluster28	UserSuppliedAssociations	MitoExplorer_Fatty_Acid_Degradation	3	23	24	13.0435	95.8333	3.36372	0.0094	0.022184	Arc42|CG2107|CG5844
Mfuzz Cluster28	UserSuppliedAssociations	MitoExplorer_Fe-S_cluster_biosynthesis	3	12	15	25	80	5.14978	0.0014	0.00413	bcn92|fh|l(3)72Do
Mfuzz Cluster28	UserSuppliedAssociations	MitoExplorer_Import_&_Sorting	11	67	74	16.4179	90.5405	7.57445	0	0.0007375	CG11779|CG13630|CG14270|CG31229|CG3156|CG8004|CG8728|Tim17b|Tim8|mge|ttm50
Mfuzz Cluster28	UserSuppliedAssociations	MitoExplorer_Metabolism_of_Lipids_&_Lipoproteins	4	18	19	22.2222	94.7368	5.53453	0.0002	0.0007375	CG10195|CG13601|CG18094|CG6656
Mfuzz Cluster28	UserSuppliedAssociations	MitoExplorer_Replication_&_Transcription	6	31	33	19.3548	93.9394	6.21804	0	0.0007375	CG14450|CG7175|CG8298|CG9791|EndoG|mtRNApol
Mfuzz Cluster28	UserSuppliedAssociations	MitoExplorer_Translation	50	180	189	27.7778	95.2381	22.5926	0	0.0007375	CG10214|CG12375|CG14231|CG14786|CG16912|CG1750|CG3021|CG4957|CG5190|CG5463|CG5705|CG6094|CG7441|CG8078|CG9531|EF-G2|Rlc1|bonsai|ico|mRpL1|mRpL12|mRpL13|mRpL14|mRpL2|mRpL20|mRpL23|mRpL24|mRpL32|mRpL38|mRpL40|mRpL41|mRpL44|mRpL46|mRpL48|mRpL49|mRpL50|mRpL51|mRpL54|mRpS11|mRpS18A|mRpS22|mRpS24|mRpS25|mRpS28|mRpS30|mRpS31|mRpS33|mRpS6|mRpS7|mRpS9
Mfuzz Cluster28	UserSuppliedAssociations	MitoExplorer_Unknown	3	23	26	13.0435	88.4615	3.36372	0.0088	0.0216333	CG14613|CG16787|asrij
Mfuzz Cluster28	biological_process	mitotic cell cycle phase transition(GO:0044772)	3	20	20	15	100	3.83126	0.0092	0.76846	Myt1|PpV|Rheb
Mfuzz Cluster28	biological_process	organic acid catabolic process(GO:0016054)	3	40	44	7.5	90.9091	2.22947	0.0432	1	CG18643|CG6638|CG9527
Mfuzz Cluster28	molecular_function	P-P-bond-hydrolysis-driven protein transmembrane transporter activity(GO:0015450)	4	22	24	18.1818	91.6667	5.02274	0.0006	0.108416	CG11779|CG31229|Tim8|mge
Mfuzz Cluster28	cellular_component	peroxisome(GO:0005777)	3	25	26	12	96.1538	3.27522	0.0144	0.8854	CG1041|CG9527|Pex19
Mfuzz Cluster28	biological_process	purine nucleotide catabolic process(GO:0006195)	4	38	41	10.5263	92.6829	3.42893	0.0084	0.70832	CG13375|Mesh1|Rgk3|Rheb
Mfuzz Cluster28	biological_process	respiratory chain complex IV assembly(GO:0008535)	3	9	9	33.3333	100	6.2666	0.001	0.167057	CG31648|CG6404|Scox
Mfuzz Cluster28	biological_process	ribonucleotide catabolic process(GO:0009261)	4	38	41	10.5263	92.6829	3.42893	0.0084	0.70832	CG13375|Mesh1|Rgk3|Rheb
Mfuzz Cluster28	cellular_component	ribosome(GO:0005840)	18	139	140	12.9496	99.2857	8.5252	0	0.0421619	CG18304|Rlc1|bonsai|mRpL12|mRpL13|mRpL14|mRpL2|mRpL20|mRpL23|mRpL24|mRpL48|mRpL49|mRpS11|mRpS18A|mRpS30|mRpS6|mRpS7|mRpS9
Mfuzz Cluster28	molecular_function	RNA binding(GO:0003723)	20	396	413	5.05051	95.8838	3.80113	0	0.0421619	CG10948|CG16912|CG2950|CG31156|CG5705|CG6094|CG8078|CG8235|DIP1|EF-G2|barc|eIF2B-epsilon|ico|mRpL1|mRpL20|mRpL44|mRpL49|mRpS24|mRpS6|mRpS7
Mfuzz Cluster28	biological_process	RNA modification(GO:0009451)	3	40	43	7.5	93.0233	2.22947	0.0446	1	CG1750|CG6345|CG8078
Mfuzz Cluster28	UserSuppliedAssociations	RNAi phenotype in muscle (Schnorrer et al 2010)	74	2028	2121	3.64892	95.6153	4.24101	0.0004	0.00138824	Atx2|Bsg|CG10948|CG11779|CG11781|CG14270|CG16912|CG18304|CG2453|CG31126|CG31156|CG31229|CG31648|CG32581|CG42322|CG4239|CG4495|CG5190|CG5463|CG5844|CG6094|CG6404|CG6852|CG7175|CG7441|CG8078|CG8728|CG9791|Cdk9|Cyp311a1|ETHR|P5CDh1|Pbgs|Rlc1|Scox|barc|bcn92|bonsai|clumsy|eIF2B-epsilon|eff|htl|ico|mRpL1|mRpL12|mRpL13|mRpL14|mRpL2|mRpL20|mRpL23|mRpL24|mRpL32|mRpL38|mRpL40|mRpL41|mRpL44|mRpL46|mRpL48|m…
Mfuzz Cluster28	UserSuppliedAssociations	Salm core 133 genes (Spletter et al, 2015)	16	131	133	12.2137	98.4962	7.44545	0	0.0007375	CG11562|CG13144|CG14270|CG14864|CG15336|CG4627|CG5190|CG6404|ECSIT|mRpL14|mRpL44|mRpL46|mRpL51|mRpL54|mRpS22|mRpS28
Mfuzz Cluster28	UserSuppliedAssociations	Salm core genes (Spletter et al 2015)	39	710	742	5.49296	95.6873	5.66884	0	0.0007375	Atx2|Bsg|CG10732|CG11562|CG13144|CG14270|CG14864|CG15336|CG1674|CG16912|CG18304|CG2658|CG2950|CG4627|CG5190|CG5376|CG5381|CG6404|DIP1|ECSIT|FBgn0265180|FBgn0265935|FBgn0266084|P5CDh1|PMCA|barc|bcn92|eff|mRpL1|mRpL14|mRpL44|mRpL46|mRpL51|mRpL54|mRpS22|mRpS24|mRpS28|mRpS9|porin
Mfuzz Cluster28	biological_process	spermatid development(GO:0007286)	3	37	40	8.10811	92.5	2.39296	0.0396	1	Bsg|EndoG|eff
Mfuzz Cluster28	molecular_function	structural constituent of ribosome(GO:0003735)	34	176	178	19.3182	98.8764	15.3398	0	0.0421619	CG18304|Rlc1|bonsai|mRpL1|mRpL12|mRpL13|mRpL14|mRpL2|mRpL20|mRpL23|mRpL24|mRpL32|mRpL38|mRpL40|mRpL41|mRpL44|mRpL46|mRpL48|mRpL49|mRpL50|mRpL51|mRpL54|mRpS11|mRpS18A|mRpS22|mRpS24|mRpS25|mRpS28|mRpS30|mRpS31|mRpS33|mRpS6|mRpS7|mRpS9
Mfuzz Cluster28	biological_process	tetrapyrrole biosynthetic process(GO:0033014)	3	11	12	27.2727	91.6667	5.57707	0.0012	0.193178	CG3156|Pbgs|Updo
Mfuzz Cluster28	biological_process	translation(GO:0006412)	31	189	193	16.4021	97.9275	13.1867	0	0.0421619	CG16912|CG18304|Rlc1|bonsai|mRpL1|mRpL12|mRpL13|mRpL14|mRpL2|mRpL20|mRpL23|mRpL24|mRpL32|mRpL38|mRpL40|mRpL41|mRpL48|mRpL49|mRpL51|mRpS11|mRpS18A|mRpS22|mRpS24|mRpS25|mRpS28|mRpS30|mRpS31|mRpS33|mRpS6|mRpS7|mRpS9
Mfuzz Cluster28	biological_process	tRNA metabolic process(GO:0006399)	6	74	78	8.10811	94.8718	3.39047	0.0032	0.422878	CG16912|CG1750|CG3021|CG5463|CG7441|CG8078
Mfuzz Cluster28	UserSuppliedAssociations	WTvssalm_24hAPF_log2FC>2	7	49	49	14.2857	100	5.48885	0	0.0007375	CG10710|CG13144|CG13306|CG18304|CG34423|CG5381|FBgn0266084
Mfuzz Cluster28	UserSuppliedAssociations	WTvssalm_30hAPF_log2FC>2	54	398	398	13.5678	100	14.9765	0	0.0007375	CG11771|CG13144|CG13306|CG13850|CG1458|CG14786|CG15336|CG15908|CG16787|CG17028|CG18304|CG2453|CG2658|CG34423|CG4627|CG5190|CG5705|CG6094|CG8010|CG9791|ECSIT|Egm|EndoG|FBgn0265180|FBgn0266084|Pbgs|Rlc1|Scox|Smyd4|asrij|beg|ico|mRpL1|mRpL12|mRpL13|mRpL14|mRpL2|mRpL20|mRpL38|mRpL40|mRpL44|mRpL46|mRpL48|mRpL49|mRpL51|mRpL54|mRpS22|mRpS24|mRpS25|mRpS30|mRpS6|mRpS9|porin|ttm50
Mfuzz Cluster28	UserSuppliedAssociations	WTvssalm_72hAPF_log2FC>2	70	449	449	15.5902	100	18.8336	0	0.0007375	CG1041|CG10710|CG11562|CG11771|CG11779|CG13144|CG13850|CG14231|CG14270|CG14613|CG14786|CG14881|CG14898|CG15336|CG15908|CG16787|CG16912|CG16935|CG1702|CG18136|CG18304|CG2453|CG2658|CG3337|CG33506|CG3420|CG34423|CG4553|CG4627|CG5131|CG5190|CG5705|CG6094|CG6106|CG6345|CG6404|CG6565|CG8010|ECSIT|EF-G2|Egm|EndoG|FBgn0265935|Pbgs|Rlc1|Scox|Updo|fh|ico|mRpL13|mRpL14|mRpL2|mRpL23|mRpL24|mRpL38|mRpL40|mRp…
Mfuzz Cluster28	UserSuppliedAssociations	WTvssalm_99hAPF_log2FC>2	25	448	448	5.58036	100	4.56251	0	0.0007375	CG11562|CG13144|CG14270|CG14864|CG15336|CG15908|CG18136|CG31229|CG3420|CG4627|CG5190|CG6404|ECSIT|Scox|mRpL14|mRpL40|mRpL44|mRpL46|mRpL48|mRpL51|mRpL54|mRpS18A|mRpS22|mRpS6|mRpS7
Mfuzz Cluster29	biological_process	cellular component assembly involved in morphogenesis(GO:0010927)	5	73	86	6.84932	84.8837	7.21733	0.0014	1	BBS1|CG4525|Cp15|dec-1|osm-1
Mfuzz Cluster29	cellular_component	chorion(GO:0042600)	3	21	38	14.2857	55.2632	8.4269	0.0016	1	CG15570|Cp15|dec-1
Mfuzz Cluster29	biological_process	cilium organization(GO:0044782)	3	31	33	9.67742	93.9394	6.80414	0.004	1	BBS1|CG4525|osm-1
Mfuzz Cluster3	molecular_function	amide binding(GO:0033218)	3	24	26	12.5	92.3077	2.6274	0.028	0.560429	CG17036|Pex5|mtacp1
Mfuzz Cluster3	biological_process	ammonium ion metabolic process(GO:0097164)	3	29	29	10.3448	100	2.22318	0.0416	0.716588	Cct1|Trh|ple
Mfuzz Cluster3	biological_process	ATP metabolic process(GO:0046034)	14	47	51	29.7872	92.1569	10.4849	0	0.00983778	ATPsyn-Cf6|ATPsyn-b|ATPsyn-d|Adk1|CG1746|CG3321|CG7598|CG7834|Cyt-c-p|Oscp|Vha55|l(1)G0230|l(2)06225|sun
Mfuzz Cluster3	molecular_function	ATPase activity, coupled to transmembrane movement of ions, rotational mechanism(GO:0044769)	8	25	26	32	96.1538	8.27293	0	0.00983778	Oscp|Vha26|Vha36-1|Vha55|VhaAC45|VhaSFD|l(1)G0230|sun
Mfuzz Cluster3	cellular_component	ATPase dependent transmembrane transport complex(GO:0098533)	4	50	52	8	96.1538	1.97025	0.049	0.804909	CG11147|CG9330|VhaAC45|w
Mfuzz Cluster3	biological_process	behavior(GO:0007610)	24	393	438	6.10687	89.726	3.42861	0.0004	0.0185424	Adar|Adh|Cyp6a20|Hmgcr|Pdf|PebIII|RanBPM|Syx4|TrpA1|beta4GalNAcTA|betaInt-nu|dare|dj-1beta|jet|moody|nompC|ple|pst|qtc|slmo|spoon|svr|tim|w
Mfuzz Cluster3	biological_process	circadian rhythm(GO:0007623)	5	53	55	9.43396	96.3636	2.62831	0.0164	0.429602	CG7988|Pdf|TrpA1|jet|tim
Mfuzz Cluster3	molecular_function	cofactor binding(GO:0048037)	11	175	188	6.28571	93.0851	2.39904	0.0126	0.350819	Acox57D-p|CG10184|CG31674|CG5703|CG7433|CG7461|CG7580|CG9172|Hmgcr|Sirt4|mtacp1
Mfuzz Cluster3	cellular_component	cytochrome complex(GO:0070069)	15	29	31	51.7241	93.5484	15.0044	0	0.00983778	CG14482|CG3731|CG7580|CoIV|CoVIII|CoVIIc|CoVIb|CoVa|CoVb|RFeSP|Ucrh|cype|levy|mt:CoI|ox
Mfuzz Cluster3	biological_process	determination of adult lifespan(GO:0008340)	9	119	127	7.56303	93.7008	2.77552	0.0056	0.185702	CG9172|Cct1|SdhC|Sod|Sod2|VhaSFD|l(3)neo18|levy|sun
Mfuzz Cluster3	biological_process	entrainment of circadian clock(GO:0009649)	3	14	14	21.4286	100	3.92043	0.0058	0.191616	Pdf|jet|tim
Mfuzz Cluster3	molecular_function	glucuronosyltransferase activity(GO:0015020)	3	27	34	11.1111	79.4118	2.3733	0.0374	0.655722	GlcAT-I|GlcAT-S|Ugt36Bc
Mfuzz Cluster3	biological_process	glycoprotein biosynthetic process(GO:0009101)	4	15	16	26.6667	93.75	5.22103	0.0008	0.0342184	GlcAT-I|GlcAT-S|Papst2|sll
Mfuzz Cluster3	cellular_component	Golgi apparatus(GO:0005794)	6	72	78	8.33333	92.3077	2.52951	0.0132	0.36409	Osbp|beta4GalNAcTA|lva|scat|sll|spoon
Mfuzz Cluster3	biological_process	Golgi vesicle transport(GO:0048193)	5	45	49	11.1111	91.8367	3.06669	0.0086	0.263475	CG9067|Snap|epsilonCOP|qtc|scat
Mfuzz Cluster3	molecular_function	heme-copper terminal oxidase activity(GO:0015002)	9	23	24	39.1304	95.8333	9.89515	0	0.00983778	CoIV|CoVIII|CoVIIc|CoVIb|CoVa|CoVb|cype|levy|mt:CoI
Mfuzz Cluster3	molecular_function	hydrogen ion transmembrane transporter activity(GO:0015078)	33	100	104	33	96.1538	17.1842	0	0.00983778	ATPsyn-Cf6|ATPsyn-b|ATPsyn-d|CG14482|CG1746|CG3321|CG3731|CG4692|CG7580|CoIV|CoVIII|CoVIIc|CoVIb|CoVa|CoVb|Nha1|Oscp|RFeSP|Ucrh|Vha16-1|Vha26|Vha36-1|Vha55|VhaAC39-1|VhaAC45|VhaSFD|cype|l(1)G0230|l(2)06225|levy|mt:CoI|ox|sun
Mfuzz Cluster3	UserSuppliedAssociations	IFM72vs30h_log2FC>2	172	1537	1537	11.1906	100	20.2965	0	0.000655556	ATPsyn-Cf6|ATPsyn-b|ATPsyn-d|Acyp2|Adh|Adk1|AnnX|Baldspot|CG10219|CG10320|CG10802|CG11147|CG11200|CG11455|CG11752|CG12203|CG12400|CG12672|CG12859|CG1319|CG13365|CG13623|CG14394|CG14482|CG14671|CG14806|CG14880|CG14997|CG15021|CG15293|CG15412|CG15629|CG15890|CG16857|CG17027|CG1746|CG17633|CG17664|CG1774|CG18317|CG30022|CG30285|CG30415|CG31087|CG31102|CG31637|CG31674|CG31690|CG31705|CG31751|CG31823|…
Mfuzz Cluster3	biological_process	lipid biosynthetic process(GO:0008610)	9	114	122	7.89474	93.4426	2.91991	0.0054	0.180421	ACC|Cct1|GlcAT-S|Hmgcr|Las|beta4GalNAcTA|dare|mtacp1|qless
Mfuzz Cluster3	biological_process	lipid modification(GO:0030258)	4	42	45	9.52381	93.3333	2.37184	0.0294	0.566354	Acox57D-p|CG17027|CG5315|frj
Mfuzz Cluster3	cellular_component	lipid particle(GO:0005811)	24	240	250	10	96	6.15483	0	0.00983778	ACC|ATPsyn-b|ATPsyn-d|Adh|Aldh|CG3321|CG3731|CG4692|CG7461|CG7580|CG7630|CG7834|CoIV|CoVa|CoVb|Cyt-b5|ND42|Oscp|cype|l(1)G0230|l(2)06225|levy|pst|trol
Mfuzz Cluster3	molecular_function	metal cluster binding(GO:0051540)	8	42	48	19.0476	87.5	5.91433	0	0.00983778	CG1319|CG13623|CG9172|Las|ND23|RFeSP|l(1)G0136|su(r)
Mfuzz Cluster3	cellular_component	mitochondrial envelope(GO:0005740)	6	48	56	12.5	85.7143	3.72019	0.0014	0.0579234	CG10219|CG18317|CG5805|CoVb|Ucp4A|ox
Mfuzz Cluster3	cellular_component	mitochondrial inner membrane(GO:0005743)	10	56	63	17.8571	88.8889	6.32242	0	0.00983778	CG10219|CG12203|CG12400|CG3621|CG6463|CoVa|Cyt-c-p|Ucp4A|levy|mt:CoI
Mfuzz Cluster3	cellular_component	mitochondrial matrix(GO:0005759)	8	53	57	15.0943	92.9825	4.99476	0	0.00983778	Aldh|CG1319|CG3731|CG7433|Cyt-c-p|ND42|Sod2|dare
Mfuzz Cluster3	cellular_component	mitochondrial membrane part(GO:0044455)	53	127	133	41.7323	95.4887	25.0646	0	0.00983778	ATPsyn-Cf6|ATPsyn-b|ATPsyn-d|CG10219|CG10320|CG11455|CG12203|CG12400|CG12859|CG14482|CG1746|CG3192|CG3214|CG3321|CG34439|CG3446|CG3621|CG3683|CG3731|CG4692|CG5548|CG5703|CG6463|CG7394|CG7580|CG7598|CG7712|CG8680|CG9172|CG9306|CoIV|CoVIII|CoVIIc|CoVIb|CoVa|CoVb|ND23|ND42|Oscp|Pdsw|RFeSP|SdhC|Ucrh|cype|l(1)G0230|l(2)06225|l(2)35Di|l(3)neo18|levy|mt:CoI|mt:ND6|ox|sun
Mfuzz Cluster3	cellular_component	mitochondrion(GO:0005739)	32	254	269	12.5984	94.4238	8.73897	0	0.00983778	ATPsyn-d|Aldh|CG10320|CG12118|CG12859|CG3192|CG3719|CG3731|CG5548|CG5703|CG7433|CG7834|CoIV|CoVIb|CoVa|CoVb|Cyt-c-p|Dmn|Las|ND23|ND42|Oscp|Pdsw|RFeSP|dare|l(1)G0230|mt:CoI|mt:ND6|mtacp1|scat|slmo|spoon
Mfuzz Cluster3	UserSuppliedAssociations	MitoExplorer_all genes	108	1002	1065	10.7784	94.0845	15.0669	0	0.000655556	ATPsyn-Cf6|ATPsyn-b|ATPsyn-d|Adh|Aldh|CG10219|CG10320|CG11095|CG11147|CG11455|CG11752|CG12118|CG12203|CG12400|CG12859|CG1319|CG13623|CG14407|CG14482|CG14806|CG14997|CG1746|CG1774|CG18317|CG30022|CG3192|CG3214|CG3321|CG34117|CG34439|CG3446|CG3621|CG3683|CG3719|CG3731|CG41128|CG4692|CG5010|CG5548|CG5703|CG5783|CG5805|CG6178|CG6463|CG7394|CG7433|CG7461|CG7580|CG7598|CG7603|CG7712|CG7772|CG7834|CG868…
Mfuzz Cluster3	UserSuppliedAssociations	MitoExplorer_Electron_Transport_Chain	66	186	192	35.4839	96.875	26.0147	0	0.000655556	ATPsyn-Cf6|ATPsyn-b|ATPsyn-d|CG10219|CG10320|CG11455|CG11752|CG12203|CG12400|CG12859|CG14482|CG1746|CG3192|CG3214|CG3321|CG34117|CG34439|CG3446|CG3621|CG3683|CG3731|CG4692|CG5548|CG5703|CG6463|CG7580|CG7598|CG7712|CG7834|CG8680|CG9065|CG9172|CG9306|CG9350|CG9921|CoIV|CoVIII|CoVIIc|CoVIb|CoVa|CoVb|Cyt-c-p|FBgn0266582|ND23|ND42|NP15.6|Neb-cGP|Oscp|Pdsw|RFeSP|SdhC|Ucrh|Vha26|VhaAC45|cype|l(1)G0230|l…
Mfuzz Cluster3	UserSuppliedAssociations	MitoExplorer_Fatty_Acid_Degradation	3	23	24	13.0435	95.8333	2.79613	0.0248	0.0636174	Adh|Aldh|CG7461
Mfuzz Cluster3	UserSuppliedAssociations	MitoExplorer_Fe-S_cluster_biosynthesis	3	12	15	25	80	4.43162	0.0028	0.00786667	CG13623|dare|l(1)G0136
Mfuzz Cluster3	UserSuppliedAssociations	MitoExplorer_ROS_Defense	6	25	31	24	80.6452	6.10933	0	0.000655556	CG14407|CG3719|FBgn0267376|Jafrac1|Sod2|dj-1beta
Mfuzz Cluster3	molecular_function	NADH dehydrogenase activity(GO:0003954)	23	41	44	56.0976	93.1818	19.4586	0	0.00983778	CG10320|CG11455|CG12203|CG12400|CG12859|CG3192|CG3214|CG3446|CG3621|CG3683|CG5548|CG5703|CG6463|CG7712|CG8680|CG9172|CG9306|ND23|ND42|Pdsw|l(2)35Di|l(3)neo18|mt:ND6
Mfuzz Cluster3	cellular_component	NADH dehydrogenase complex(GO:0030964)	25	43	45	58.1395	95.5556	20.6981	0	0.00983778	CG10320|CG11455|CG12203|CG12400|CG12859|CG3192|CG3214|CG34439|CG3446|CG3621|CG3683|CG5548|CG5703|CG6463|CG7598|CG7712|CG8680|CG9172|CG9306|ND23|ND42|Pdsw|l(2)35Di|l(3)neo18|mt:ND6
Mfuzz Cluster3	biological_process	nucleobase-containing compound transport(GO:0015931)	5	68	71	7.35294	95.7746	1.99313	0.0434	0.738968	CG10320|Vha16-1|VhaSFD|sll|w
Mfuzz Cluster3	molecular_function	oxidoreductase activity, acting on a heme group of donors(GO:0016675)	9	23	24	39.1304	95.8333	9.89515	0	0.00983778	CoIV|CoVIII|CoVIIc|CoVIb|CoVa|CoVb|cype|levy|mt:CoI
Mfuzz Cluster3	molecular_function	oxidoreductase activity, acting on NAD(P)H, quinone or similar compound as acceptor(GO:0016655)	20	36	38	55.5556	94.7368	18.0424	0	0.00983778	CG10320|CG12203|CG12400|CG12859|CG3192|CG3214|CG3621|CG3683|CG5548|CG5703|CG6463|CG7712|CG8680|CG9172|CG9306|ND23|ND42|Pdsw|l(3)neo18|mt:ND6
Mfuzz Cluster3	molecular_function	oxidoreductase activity, acting on the CH-CH group of donors, quinone or related compound as acceptor(GO:0016635)	3	7	7	42.8571	100	6.01946	0.0004	0.0185424	CG10219|SdhC|su(r)
Mfuzz Cluster3	molecular_function	oxidoreductase activity, acting on the CH-OH group of donors, NAD or NADP as acceptor(GO:0016616)	6	77	81	7.79221	95.0617	2.34352	0.0176	0.449006	Adh|CG10863|CG11200|CG31674|CG31937|Hmgcr
Mfuzz Cluster3	biological_process	oxoacid metabolic process(GO:0043436)	22	294	323	7.48299	91.0217	4.32206	0	0.00983778	ACC|Acox57D-p|Aldh|CG10184|CG10219|CG10802|CG5315|CG6178|CG6428|CG6465|CG7433|Hex-A|Las|Papst2|Pglym78|Pu|SdhC|Trh|mtacp1|ple|sll|spoon
Mfuzz Cluster3	biological_process	peroxisome organization(GO:0007031)	3	16	17	18.75	94.1176	3.5774	0.0116	0.330246	Pex13|Pex16|Pex5
Mfuzz Cluster3	biological_process	phenol-containing compound metabolic process(GO:0018958)	4	49	52	8.16327	94.2308	2.01597	0.0424	0.723333	Trh|betaInt-nu|ple|poly
Mfuzz Cluster3	molecular_function	phospholipase activity(GO:0004620)	4	41	48	9.7561	85.4167	2.42868	0.0224	0.540408	CG10747|CG6428|GXIVsPLA2|iPLA2-VIA
Mfuzz Cluster3	biological_process	photoperiodism(GO:0009648)	3	7	7	42.8571	100	6.01946	0.0014	0.0579234	Pdf|jet|tim
Mfuzz Cluster3	biological_process	proton transport(GO:0015992)	18	60	63	30	95.2381	11.949	0	0.00983778	ATPsyn-Cf6|ATPsyn-b|ATPsyn-d|CG1746|CG3321|CG4692|Oscp|Ucp4A|Vha16-1|Vha26|Vha36-1|Vha55|VhaAC39-1|VhaAC45|VhaSFD|l(1)G0230|l(2)06225|sun
Mfuzz Cluster3	cellular_component	proton-transporting two-sector ATPase complex, catalytic domain(GO:0033178)	7	26	27	26.9231	96.2963	6.95259	0	0.00983778	Vha26|Vha36-1|Vha55|VhaAC45|VhaSFD|l(1)G0230|sun
Mfuzz Cluster3	biological_process	reactive oxygen species metabolic process(GO:0072593)	3	15	16	20	93.75	3.74111	0.0078	0.244898	Jafrac1|Sod|Sod2
Mfuzz Cluster3	biological_process	regulation of circadian sleep/wake cycle(GO:0042749)	3	19	20	15.7895	95	3.15916	0.0186	0.46521	Pdf|Trh|tim
Mfuzz Cluster3	biological_process	regulation of system process(GO:0044057)	3	23	24	13.0435	95.8333	2.7214	0.0248	0.560429	DmsR-2|SNF1A|capa
Mfuzz Cluster3	biological_process	renal system process(GO:0003014)	3	7	7	42.8571	100	6.01946	0	0.00983778	CG17664|CG4019|Nha1
Mfuzz Cluster3	cellular_component	respiratory chain(GO:0070469)	8	17	17	47.0588	100	10.3784	0	0.00983778	CG12400|Cyt-c-p|ND42|RFeSP|mt:CoI|mt:ND6|mtacp1|ox
Mfuzz Cluster3	biological_process	respiratory electron transport chain(GO:0022904)	37	69	72	53.6232	95.8333	24.0976	0	0.00983778	CG10219|CG10320|CG11455|CG12400|CG12859|CG14482|CG3192|CG3214|CG3446|CG3621|CG3683|CG3731|CG5548|CG5703|CG6463|CG7580|CG7712|CG9172|CG9306|CoIV|CoVIII|CoVIIc|CoVa|CoVb|ND23|ND42|Pdsw|RFeSP|SdhC|Ucrh|cype|l(2)35Di|l(3)neo18|levy|mt:CoI|mtacp1|ox
Mfuzz Cluster3	biological_process	response to oxidative stress(GO:0006979)	8	67	73	11.9403	91.7808	4.13617	0.0002	0.00983778	CG6770|CG9172|GstE1|SdhC|Sod|dj-1beta|l(3)neo18|sun
Mfuzz Cluster3	UserSuppliedAssociations	RNAi phenotype in muscle (Schnorrer et al 2010)	85	2028	2121	4.19132	95.6153	3.39332	0.004	0.0107273	ATPsyn-Cf6|ATPsyn-b|ATPsyn-d|CG10219|CG10320|CG10802|CG11306|CG11455|CG11984|CG12203|CG12338|CG12400|CG12859|CG13623|CG14407|CG14818|CG17840|CG30415|CG3192|CG32442|CG33169|CG3683|CG3731|CG4645|CG4692|CG5548|CG5703|CG5862|CG6424|CG6463|CG7394|CG7580|CG7598|CG7603|CG7630|CG7834|CG8680|CG9034|CG9065|CG9172|CG9350|CG9536|CG9921|CoIV|CoVIII|CoVIb|CoVa|CoVb|Cyt-c-p|FBgn0266464|FBgn0266582|FBgn0267385|F…
Mfuzz Cluster3	UserSuppliedAssociations	Salm core 133 genes (Spletter et al, 2015)	16	131	133	12.2137	98.4962	6.15431	0	0.000655556	ATPsyn-Cf6|CG10802|CG14482|CG1746|CG1774|CG33054|CG34242|CG3731|CG7630|ND42|Neb-cGP|TpnC4|Ugt36Bc|fln|l(3)neo18|mtacp1
[truncated: 1,010 more rows]

## Sheet: Custom Gene Sets
FBgn	Gene Set
[truncated: 16,420 more rows]
