# Supplementary material for: A transcriptomics resource reveals a transcriptional transition during ordered sarcomere morphogenesis in flight muscle
Source: eLife. 2018 May 30;7:e34058. doi: 10.7554/eLife.34058 (PMC6005683; doi:10.7554/eLife.34058)
Supplement: Supplementary file 3. — This table includes a numerical summary of quantification values reported graphically in Figures 5, 7 and 8. Quantifications of sarcomere length, myofibril width and myofibril diameter were performed with the MyofibrilJ script (see Materials and methods). Fiber length and cross-sectional area measurements were performed in Fiji/Image J. [file elife-34058-supp3.xlsx]

## Sheet: Sheet1
		Timepoint
Sample	Measurement	30 h APF	32 h APF	34 h APF	48 h APF	56 h APF	60 h APF	72 h APF	80 h APF	90 h APF	1 d adult	2 d adult	Units
w-	Sarcomere Length	-	-	1.81 ± 0.26	2.06 ± 0.84	2.35 ± 0.10	2.39 ± 0.19	2.83 ± 0.17	2.92 ± 0.21	2.93 ± 0.22	3.24 ± 0.24	-	AVG ± STDEV, μM
	Myofibril Width	-	-	0.46 ± 0.07	0.43 ± 0.04	0.49 ± 0.03	0.63 ± 0.07	0.78 ± 0.10	0.92 ± 0.05	0.90 ± 0.08	1.12 ± 0.10	-	AVG ± STDEV, μM
	Myofibril Diameter	0.40 ± 0.03	-	-	0.46 ± 0.03	-	0.58 ± 0.06	0.93 ± 0.08	0.99 ± 0.08	1.06 ± 0.08	1.43 ± 0.10	-	AVG ± STDEV, μM
	Myofibril Density	1.145	-	-	1.14647	-	0.871185	0.514128	0.4995	0.442545	0.259333	-	fibrils per μM^2
	Fiber Length	-	147 ± 18	185 ± 32	480 ± 33	593 ± 45	654 ± 77	764 ± 64	791 ± 53	783 ± 56	852 ± 64	-	AVG ± STDEV, μM
	Fiber Cross-Sectional area	1569 ± 307	-	-	1759 ± 403	-	2334 ± 683	3854 ± 1131	4643 ± 1333	4952 ± 1095	6970 ± 1560	-	AVG ± STDEV, μM^2
	Sarcomeres per myofibril	-	81 ± 10	102 ± 15	233 ± 16	252 ± 26	274 ± 32	270 ± 22	271 ± 18	267 ± 19	263 ± 20	-	AVG ± STDEV; *=calculated with 34 h APF sarcomere length
	Myofibrils per fiber	1797 ± 351	-	-	2017 ± 462	-	2033 ± 595	1982 ± 581	2319 ± 666	2191 ± 484	1808 ± 404	-	AVG ± STDEV, Integer
Strn(M10289)	Sarcomere Length	-	-	-	2.03 ± 0.06	-	2.52 ± 0.26	2.88 ± 0.44	3.31 ± 0.14	3.12 ± 0.24	2.31 ± 0.35	-	AVG ± STDEV, μM
	Myofibril Width	-	-	-	0.41 ± 0.05	-	0.60 ± 0.07	0.75 ± 0.07	0.83 ± 0.06	0.89 ± 0.08	1.45 ± 0.25	-	AVG ± STDEV, μM
	Fiber Length	-	-	-	474 ± 59	-	661 ± 89	808 ± 79	864 ± 90	781 ± 71	-	-	AVG ± STDEV, μM
	Sarcomeres per myofibril	-	-	-	233 ± 29	-	262 ± 36	281 ± 28	261 ± 27	250 ± 23	-	-	AVG ± STDEV; *=calculated with 34 h APF sarcomere length
Act88F-Gal4 x w-	Sarcomere Length	-	-	-	1.90 ± 0.07	-	-	2.68 ± 0.21	-	3.04 ± 0.22	3.37 ± 0.20	3.38 ± 0.24	AVG ± STDEV, μM
	Myofibril Width	-	-	-	0.45 ± 0.04	-	-	0.65 ± 0.09	-	0.80 ± 0.15	0.91 ± 0.13	1.15 ± 0.07	AVG ± STDEV, μM
Act88F-Gal4 x salmIR	Sarcomere Length	-	-	-	1.86 ± 0.11	-	-	2.39 ± 0.25	-	2.62 ± 0.23	2.84 ± 0.36	2.46 ± 0.62	AVG ± STDEV, μM
	Myofibril Width	-	-	-	0.43 ± 0.05	-	-	0.61 ± 0.09	-	0.74 ± 0.15	0.95 ± 0.26	1.08 ± 0.29	AVG ± STDEV, μM
