# Supplementary material for: A transcriptomics resource reveals a transcriptional transition during ordered sarcomere morphogenesis in flight muscle
Source: eLife. 2018 May 30;7:e34058. doi: 10.7554/eLife.34058 (PMC6005683; doi:10.7554/eLife.34058)
Supplement: Supplementary file 5. — This table includes multiple tabs containing the statistical and calculation data for the different panels of Figures 1, 5, 6, 7 and 8. [file elife-34058-supp5.xlsx]

## Sheet: Figure1
Figure 7I	Figure 1 B''''-H''''	Myofiber lengths in control w- development
			16h	24h	32h	48h	56h	72h	90h
		Number of animals/biological replicates	10	13	33	22	25	13	20
		technical replicates/experimental repetitions	1	1	4	3	2	2	4
		Number of values (fibers 3&4)	10	22	58	37	50	27	40
		Minimum	243.6	204.3	113.7	404.3	506.4	669	675.3
		25% Percentile	296.8	231.1	134.4	460.5	555.9	708.4	738.3
		Median	330.5	242	142.8	479.8	590.6	758.1	775.6
		75% Percentile	339.7	249.4	163	508.8	616	814.9	828.8
		Maximum	355.6	264.1	184.8	529.7	695.8	930	934.4
		Mean	318.2	239.2	147.2	479.6	592.5	765.7	781.4
		Std. Deviation	33.08	15.15	18.07	32.91	45.19	72.09	60.63
		Std. Error of Mean	10.46	3.231	2.373	5.411	6.391	13.87	9.587
		Lower 95% CI	294.5	232.4	142.5	468.6	579.7	737.2	762
		Upper 95% CI	341.8	245.9	152	490.5	605.4	794.2	800.8

## Sheet: Figure5
Figure 5A	Developmental myofiber lengths in control w-
	Descriptive Statistics		34h	48h	60h	72h	80h	90h	100h
		Number of animals/biological replicates	15	19	20	15	20	25	15
		technical replicates/experimental repetitions	2	2	2	2	2	3	2
		Number of values	21	37	39	30	40	50	30
		Minimum	138.3	404.3	513.2	669	708.8	693.2	741.9
		25% Percentile	154.2	460.5	591.7	710	741	743.9	803.2
		Median	184.4	479.8	672.3	762.1	804.9	776.5	839.1
		75% Percentile	212.1	508.8	707	824.2	823.7	829.7	924.2
		Maximum	242.8	529.7	805.1	883.8	899.9	934.4	949.4
		Mean	185	479.6	654.5	764.3	791.4	783.2	852.6
		Std. Deviation	32.43	32.91	77.44	63.52	52.55	56.4	63.77
		Std. Error of Mean	7.077	5.411	12.4	11.6	8.308	7.976	11.64
		Lower 95% CI	170.3	468.6	629.4	740.6	774.6	767.2	828.8
		Upper 95% CI	199.8	490.5	679.6	788.1	808.2	799.2	876.4
	software - GraphPad	ANOVA summary
		F	446.8		Brown-Forsythe test			Bartlett's test			ANOVA table	SS	DF	MS	F (DFn, DFd)	P value		Data summary
		P value	<0.0001		F (DFn, DFd)	6.065 (6, 240)		Bartlett's statistic (corrected)	35.02		Treatment (between columns)	8783865	6	1463977	F (6, 240) = 446.8	P<0.0001		Number of treatments (columns)	7
		P value summary	****		P value	<0.0001		P value	<0.0001		Residual (within columns)	786401	240	3277				Number of values (total)	247
		Significant diff. among means (P < 0.05)?	Yes		P value summary	****		P value summary	****		Total	9570266	246
		R square	0.9178		Are SDs significantly different (P < 0.05)?	Yes		Are SDs significantly different (P < 0.05)?	Yes
	software - GraphPad	multiple comparisons tests
		Tukey's multiple comparisons test	Mean Diff.	95.00% CI of diff.	Significant?	Summary	Adjusted P Value		Test details	Mean 1	Mean 2	Mean Diff.	SE of diff.	n1	n2	q	DF
		34h vs. 48h	-294.5	-341 to -248	Yes	****	<0.0001		34h vs. 48h	185	479.6	-294.5	15.64	21	37	26.63	240
		48h vs. 60h	-174.9	-214 to -135.9	Yes	****	<0.0001		48h vs. 60h	479.6	654.5	-174.9	13.14	37	39	18.83	240
		60h vs. 72h	-109.9	-151.2 to -68.52	Yes	****	<0.0001		60h vs. 72h	654.5	764.3	-109.9	13.9	39	30	11.18	240
		72h vs. 80h	-27.1	-68.21 to 14.01	No	ns	0.443		72h vs. 80h	764.3	791.4	-27.1	13.83	30	40	2.772	240
		80h vs. 90h	8.218	-27.89 to 44.33	No	ns	0.9938		80h vs. 90h	791.4	783.2	8.218	12.14	40	50	0.9571	240
		90h vs. 1day	-69.36	-108.7 to -30.05	Yes	****	<0.0001		90h vs. 1day	783.2	852.6	-69.36	13.22	50	30	7.42	240
Figure 5B	Developmental sarcomere lengths in control w-
	Descriptive Statistics		34hWT	48hWT	60hWT	72hWT	80hWT	90hWT	100hWT
		Number of animals/biological replicates	15	16	23	23	7	10	15
		technical replicates/experimental repetitions	2	2	3	2	1	1	2
		Number of values (images analyzed)	31	30	41	56	21	32	42
		Minimum	1.328	1.848	2.074	2.362	2.362	2.429	2.576
		25% Percentile	1.518	2.024	2.237	2.743	2.883	2.834	3.149
		Median	1.771	2.049	2.362	2.834	3.036	3.036	3.27
		75% Percentile	2.125	2.125	2.501	2.932	3.036	3.036	3.401
		Maximum	2.125	2.237	2.834	3.149	3.036	3.149	3.542
		Mean	1.811	2.055	2.391	2.826	2.924	2.929	3.239
		Std. Deviation	0.2625	0.08429	0.1926	0.1672	0.208	0.2156	0.2399
		Std. Error of Mean	0.04714	0.01539	0.03007	0.02234	0.0454	0.03811	0.03702
		Lower 95% CI	1.715	2.024	2.33	2.781	2.829	2.852	3.164
		Upper 95% CI	1.907	2.087	2.452	2.871	3.019	3.007	3.314
	software - GraphPad	ANOVA summary
		F	211.4		Brown-Forsythe test			Bartlett's test			ANOVA table	SS	DF	MS	F (DFn, DFd)	P value		Data summary
		P value	<0.0001		F (DFn, DFd)	4.459 (7, 264)		Bartlett's statistic (corrected)	48.94		Treatment (between columns)	56.83	7	8.119	F (7, 264) = 211.4	P<0.0001		Number of treatments (columns)	8
		P value summary	****		P value	0.0001		P value	<0.0001		Residual (within columns)	10.14	264	0.03841				Number of values (total)	272
		Significant diff. among means (P < 0.05)?	Yes		P value summary	***		P value summary	****		Total	66.97	271
		R square	0.8486		Are SDs significantly different (P < 0.05)?	Yes		Are SDs significantly different (P < 0.05)?	Yes
	software - GraphPad	Tukey's multiple comparisons test	Mean Diff.	95.00% CI of diff.	Significant?	Summary	Adjusted P Value		Test details	Mean 1	Mean 2	Mean Diff.	SE of diff.	n1	n2	q	DF
		34hWT vs. 48hWT	-0.2442	-0.3975 to -0.0908	Yes	****	<0.0001		34hWT vs. 48hWT	1.811	2.055	-0.2442	0.05019	31	30	6.879	264
		48hWT vs. 60hWT	-0.3359	-0.4798 to -0.192	Yes	****	<0.0001		48hWT vs. 60hWT	2.055	2.391	-0.3359	0.04709	30	41	10.09	264
		60hWT vs. 72hWT	-0.4349	-0.558 to -0.3118	Yes	****	<0.0001		60hWT vs. 72hWT	2.391	2.826	-0.4349	0.04028	41	56	15.27	264
		72hWT vs. 80hWT	-0.09781	-0.251 to 0.05542	No	ns	0.5176		72hWT vs. 80hWT	2.826	2.924	-0.09781	0.05015	56	21	2.758	264
		80hWT vs. 90hWT	-0.005659	-0.1738 to 0.1625	No	ns	>0.9999		80hWT vs. 90hWT	2.924	2.929	-0.005659	0.05504	21	32	0.1454	264
		90hWT vs. 1dayWT	-0.3096	-0.4501 to -0.169	Yes	****	<0.0001		90hWT vs. 1dayWT	2.929	3.239	-0.3096	0.04599	32	42	9.519	264
Figure 5C	Developmental myofibril widths in control w-
	Descriptive Statistics		34hWT	48hWT	60hWT	72hWT	80hWT	90hWT	100hWT
		Number of animals/biological replicates	15	16	23	23	7	10	15
		technical replicates/experimental repetitions	2	2	3	2	1	1	2
		Number of values	36	55	47	64	20	30	45
		Minimum	0.332	0.332	0.457	0.581	0.83	0.747	0.913
		25% Percentile	0.415	0.415	0.581	0.706	0.913	0.83	1.079
		Median	0.415	0.415	0.664	0.747	0.913	0.913	1.162
		75% Percentile	0.498	0.457	0.664	0.83	0.9753	0.9338	1.162
		Maximum	0.581	0.498	0.747	0.996	0.996	0.996	1.328
		Mean	0.4565	0.4264	0.6341	0.7771	0.9213	0.8964	1.116
		Std. Deviation	0.0729	0.03868	0.07011	0.09502	0.05318	0.07675	0.1025
		Std. Error of Mean	0.01215	0.005216	0.01023	0.01188	0.01189	0.01401	0.01528
		Lower 95% CI	0.4318	0.416	0.6135	0.7534	0.8964	0.8677	1.085
		Upper 95% CI	0.4812	0.4369	0.6547	0.8009	0.9462	0.9251	1.147
	software - GraphPad	ANOVA summary
		F	432.8		Brown-Forsythe test			Bartlett's test			ANOVA table	SS	DF	MS	F (DFn, DFd)	P value		Data summary
		P value	<0.0001		F (DFn, DFd)	6.611 (7, 306)		Bartlett's statistic (corrected)	67.56		Treatment (between columns)	17.48	7	2.498	F (7, 306) = 432.8	P<0.0001		Number of treatments (columns)	8
		P value summary	****		P value	<0.0001		P value	<0.0001		Residual (within columns)	1.766	306	0.005771				Number of values (total)	314
		Significant diff. among means (P < 0.05)?	Yes		P value summary	****		P value summary	****		Total	19.25	313
		R square	0.9083		Are SDs significantly different (P < 0.05)?	Yes		Are SDs significantly different (P < 0.05)?	Yes
	software - GraphPad	Tukey's multiple comparisons test	Mean Diff.	95.00% CI of diff.	Significant?	Summary	Adjusted P Value		Test details	Mean 1	Mean 2	Mean Diff.	SE of diff.	n1	n2	q	DF
		34hWT vs. 48hWT	0.03008	-0.01962 to 0.07979	No	ns	0.5883		34hWT vs. 48hWT	0.4565	0.4264	0.03008	0.01629	36	55	2.612	306
		48hWT vs. 60hWT	-0.2077	-0.2537 to -0.1616	Yes	****	<0.0001		48hWT vs. 60hWT	0.4264	0.6341	-0.2077	0.01509	55	47	19.46	306
		60hWT vs. 72hWT	-0.143	-0.1876 to -0.09848	Yes	****	<0.0001		60hWT vs. 72hWT	0.6341	0.7771	-0.143	0.01459	47	64	13.86	306
		72hWT vs. 80hWT	-0.1442	-0.2036 to -0.08478	Yes	****	<0.0001		72hWT vs. 80hWT	0.7771	0.9213	-0.1442	0.01946	64	20	10.48	306
		80hWT vs. 90hWT	0.0249	-0.04203 to 0.09183	No	ns	0.9485		80hWT vs. 90hWT	0.9213	0.8964	0.0249	0.02193	20	30	1.606	306
		90hWT vs. 1dayWT	-0.2195	-0.2741 to -0.1648	Yes	****	<0.0001		90hWT vs. 100hWT	0.8964	1.116	-0.2195	0.01791	30	45	17.34	306
Figure 5D	Calculation of sarcomeres per myofibril in control w-
	Descriptive Statistics		34h	48h	60h	72h	80h	90h	1 day
		Number of values	21	37	39	30	40	50	30
		Minimum	76.34	196.7	214.6	236.7	242.4	236.6	229
		25% Percentile	85.15	224.1	247.5	251.3	253.4	253.9	248
		Median	101.8	233.5	281.2	269.7	275.3	265.1	259.1
		75% Percentile	117.1	247.6	295.7	291.7	281.7	283.2	285.3
		Maximum	134.1	257.7	336.7	312.7	307.8	319	293.1
		Mean	102.2	233.3	273.7	270.5	270.7	267.4	263.2
		Std. Deviation	17.91	16.01	32.39	22.48	17.97	19.25	19.69
		Std. Error of Mean	3.908	2.633	5.186	4.104	2.842	2.723	3.594
		Lower 95% CI	94.03	228	263.2	262.1	264.9	261.9	255.9
		Upper 95% CI	110.3	238.7	284.2	278.9	276.4	272.8	270.6
	software - GraphPad	ANOVA summary
		F	193		Brown-Forsythe test			Bartlett's test			ANOVA table	SS	DF	MS	F (DFn, DFd)	P value		Data summary
		P value	<0.0001		F (DFn, DFd)	5.391 (6, 240)		Bartlett's statistic (corrected)	27.01		Treatment (between columns)	541042	6	90174	F (6, 240) = 193	P<0.0001		Number of treatments (columns)	7
		P value summary	****		P value	<0.0001		P value	0.0001		Residual (within columns)	112156	240	467.3				Number of values (total)	247
		Significant diff. among means (P < 0.05)?	Yes		P value summary	****		P value summary	***		Total	653198	246
		R square	0.8283		Are SDs significantly different (P < 0.05)?	Yes		Are SDs significantly different (P < 0.05)?	Yes
	software - GraphPad	multiple comparisons tests
		Tukey's multiple comparisons test	Mean Diff.	95.00% CI of diff.	Significant?	Summary	Adjusted P Value		Test details	Mean 1	Mean 2	Mean Diff.	SE of diff.	n1	n2	q	DF
		34h vs. 48h	-131.2	-148.7 to -113.6	Yes	****	<0.0001		34h vs. 48h	102.2	233.3	-131.2	5.906	21	37	31.4	240
		48h vs. 60h	-40.38	-55.13 to -25.63	Yes	****	<0.0001		48h vs. 60h	233.3	273.7	-40.38	4.961	37	39	11.51	240
		60h vs. 72h	3.252	-12.36 to 18.86	No	ns	0.9961		60h vs. 72h	273.7	270.5	3.252	5.25	39	30	0.876	240
		72h vs. 80h	-0.2201	-15.75 to 15.31	No	ns	>0.9999		72h vs. 80h	270.5	270.7	-0.2201	5.221	30	40	0.05963	240
		80h vs. 90h	3.328	-10.31 to 16.96	No	ns	0.9909		80h vs. 90h	270.7	267.4	3.328	4.586	40	50	1.026	240
		34h vs. 1day	-161	-179.3 to -142.8	Yes	****	<0.0001		34h vs. 100h	102.2	263.2	-161	6.151	21	30	37.03	240
		48h vs. 1day	-29.88	-45.68 to -14.09	Yes	****	<0.0001		48h vs. 100h	233.3	263.2	-29.88	5.311	37	30	7.958	240
		90h vs. 1day	4.137	-10.71 to 18.98	No	ns	0.9818		90h vs. 100h	267.4	263.2	4.137	4.992	50	30	1.172	240
Figure 5F	Calculation of developmental myofibril diameter in control w-
	Descriptive Statistics		30h	48h	60h	72h	80h	90h	100h
		Number of animals/biological replicates	18	20	21	24	19	20	22
		technical replicates/experimental repetitions	2	2	2	2	2	2	2
		Number of values	23	38	27	39	32	33	39
		Minimum	0.362	0.412	0.514	0.779	0.838	0.918	1.271
		25% Percentile	0.392	0.4418	0.547	0.87	0.941	0.995	1.359
		Median	0.418	0.4615	0.555	0.931	0.9915	1.063	1.428
		75% Percentile	0.437	0.476	0.578	1.009	1.06	1.118	1.502
		Maximum	0.482	0.51	0.773	1.078	1.174	1.176	1.687
		Mean	0.415	0.4602	0.5779	0.9365	0.995	1.052	1.433
		Std. Deviation	0.02957	0.02369	0.06505	0.08255	0.07387	0.07431	0.09568
		Std. Error of Mean	0.006166	0.003842	0.01252	0.01322	0.01306	0.01294	0.01532
		Lower 95% CI	0.4022	0.4525	0.5522	0.9098	0.9683	1.025	1.402
		Upper 95% CI	0.4277	0.468	0.6037	0.9633	1.022	1.078	1.464
	software - GraphPad	ANOVA summary
		F	934		Brown-Forsythe test			Bartlett's test			ANOVA table	SS	DF	MS	F (DFn, DFd)	P value		Data summary
		P value	<0.0001		F (DFn, DFd)	10.1 (6, 224)		Bartlett's statistic (corrected)	78.54		Treatment (between columns)	27.59	6	4.598	F (6, 224) = 934	P<0.0001		Number of treatments (columns)	7
		P value summary	****		P value	<0.0001		P value	<0.0001		Residual (within columns)	1.103	224	0.004923				Number of values (total)	231
		Significant diff. among means (P < 0.05)?	Yes		P value summary	****		P value summary	****		Total	28.69	230
		R square	0.9616		Are SDs significantly different (P < 0.05)?	Yes		Are SDs significantly different (P < 0.05)?	Yes
	software - GraphPad	Bonferroni's multiple comparisons test	Mean Diff.	95.00% CI of diff.	Significant?	Summary	Adjusted P Value		Test details	Mean 1	Mean 2	Mean Diff.	SE of diff.	n1	n2	t	DF
		30h vs. 48h	-0.04528	-0.1022 to 0.01168	No	ns	0.3223		30h vs. 48h	0.415	0.4602	-0.04528	0.01854	23	38	2.443	224
		48h vs. 60h	-0.1177	-0.172 to -0.06342	Yes	****	<0.0001		48h vs. 60h	0.4602	0.5779	-0.1177	0.01766	38	27	6.664	224
		60h vs. 72h	-0.3586	-0.4126 to -0.3046	Yes	****	<0.0001		60h vs. 72h	0.5779	0.9365	-0.3586	0.01757	27	39	20.41	224
		72h vs. 80h	-0.05846	-0.1099 to -0.007027	Yes	*	0.0121		72h vs. 80h	0.9365	0.995	-0.05846	0.01674	39	32	3.493	224
		80h vs. 90h	-0.05667	-0.1102 to -0.003173	Yes	*	0.0275		80h vs. 90h	0.995	1.052	-0.05667	0.01741	32	33	3.255	224
		90h vs. 1d adult	-0.3818	-0.4328 to -0.3308	Yes	****	<0.0001		90h vs. 1d adult	1.052	1.433	-0.3818	0.0166	33	39	23.01	224
Figure 5G	Calculation of developmental myofiber cross-sectional area in control w-
	Descriptive Statistics		30h	48h	60h	72h	80h	90h	100h
		Number of animals/biological replicates	25	28	25	35	40	38	36
		technical replicates/experimental repetitions	3	3	2	3	4	4	3
		Number of values	129	140	146	192	226	216	172
		Minimum	971.3	802.4	1281	1836	1796	2040	2759
		25% Percentile	1319	1481	1886	2932	3448	4234	5920
		Median	1552	1763	2196	3641	4463	4787	6937
		75% Percentile	1782	2011	2671	4620	5655	5612	8106
		Maximum	2403	3067	4411	6809	8107	8976	11013
		Mean	1569	1759	2321	3854	4584	4952	6970
		Std. Deviation	306.8	403.4	646.3	1132	1353	1096	1561
		Std. Error of Mean	27.01	34.09	53.49	81.68	89.97	74.56	119
		Lower 95% CI	1516	1692	2215	3693	4407	4805	6735
		Upper 95% CI	1623	1827	2426	4016	4762	5099	7205
	software - GraphPad	ANOVA summary
		F	520.5		Brown-Forsythe test			Bartlett's test			ANOVA table	SS	DF	MS	F (DFn, DFd)	P value		Data summary
		P value	<0.0001		F (DFn, DFd)	57.73 (6, 1214)		Bartlett's statistic (corrected)	501.1		Treatment (between columns)	3668791989	6	611465332	F (6, 1214) = 520.5	P<0.0001		Number of treatments (columns)	7
		P value summary	****		P value	<0.0001		P value	<0.0001		Residual (within columns)	1426166698	1214	1174767				Number of values (total)	1221
		Significant diff. among means (P < 0.05)?	Yes		P value summary	****		P value summary	****		Total	5094958688	1220
		R square	0.7201		Are SDs significantly different (P < 0.05)?	Yes		Are SDs significantly different (P < 0.05)?	Yes
	software - GraphPad	Tukey's multiple comparisons test	Mean Diff.	95.00% CI of diff.	Significant?	Summary	Adjusted P Value		Test details	Mean 1	Mean 2	Mean Diff.	SE of diff.	n1	n2	q	DF
		30h vs. 48h	-190	-580.7 to 200.6	No	ns	0.7819		30h vs. 48h	1569	1759	-190	132.3	129	140	2.032	1214
		48h vs. 60h	-561.2	-939.8 to -182.5	Yes	***	0.0003		48h vs. 60h	1759	2321	-561.2	128.2	140	146	6.19	1214
		60h vs. 72h	-1534	-1885 to -1182	Yes	****	<0.0001		60h vs. 72h	2321	3854	-1534	119	146	192	18.23	1214
		72h vs. 80h	-729.9	-1044 to -415.7	Yes	****	<0.0001		72h vs. 80h	3854	4584	-729.9	106.4	192	226	9.703	1214
		80h vs. 90h	-367.4	-672 to -62.85	Yes	**	0.007		80h vs. 90h	4584	4952	-367.4	103.1	226	216	5.038	1214
		90h vs. 1d adult	-2019	-2346 to -1691	Yes	****	<0.0001		90h vs. 1d adult	4952	6970	-2019	110.8	216	172	25.77	1214
Figure 5H	Calculation of fibrils per myofiber
	Descriptive Statistics		30h	48h	60h	72h	80h	90h	100h
		Number of values	129	140	146	192	187	216	172
		Minimum	1112	919.9	1116	943.8	897	902.7	715.4
		25% Percentile	1511	1698	1643	1508	1753	1874	1535
		Median	1777	2021	1913	1872	2248	2119	1799
		75% Percentile	2040	2306	2327	2375	2825	2484	2102
		Maximum	2751	3516	3843	3501	4049	3972	2856
		Mean	1797	2017	2020	1982	2319	2191	1808
		Std. Deviation	351.3	462.5	561.3	581.9	666.2	484.9	404.7
		Std. Error of Mean	30.93	39.08	46.45	41.99	48.72	32.99	30.86
		Lower 95% CI	1736	1940	1928	1899	2223	2126	1747
		Upper 95% CI	1858	2094	2112	2065	2415	2256	1869
	software - GraphPad	ANOVA summary
		F	22.98		Brown-Forsythe test			Bartlett's test			ANOVA table	SS	DF	MS	F (DFn, DFd)	P value		Data summary
		P value	<0.0001		F (DFn, DFd)	14.74 (6, 1175)		Bartlett's statistic (corrected)	88.57		Treatment (between columns)	37194981	6	6199163	F (6, 1175) = 22.98	P<0.0001		Number of treatments (columns)	7
		P value summary	****		P value	<0.0001		P value	<0.0001		Residual (within columns)	316990163	1175	269779				Number of values (total)	1182
		Significant diff. among means (P < 0.05)?	Yes		P value summary	****		P value summary	****		Total	354185144	1181
		R square	0.105		Are SDs significantly different (P < 0.05)?	Yes		Are SDs significantly different (P < 0.05)?	Yes
	software - GraphPad	Tukey's multiple comparisons test	Mean Diff.	95.00% CI of diff.	Significant?	Summary	Adjusted P Value		Test details	Mean 1	Mean 2	Mean Diff.	SE of diff.	n1	n2	q	DF
		30h vs. 100h	-10.59	-189.3 to 168.1	No	ns	>0.9999		30h vs. 100h	1797	1808	-10.59	60.5	129	172	0.2476	1175
Figure 5J	Developmental myofiber twitch events for control w-
	Descriptive Statistics		30h	36h	42h	48h	60h	72h
		Number of animals/biological replicates	25	23	19	15	15	29
		Number of fibers observed	51	50	40	49	46	79
		technical replicates/experimental repetitions	2	2	2	3	2	3
		Number of values	25	23	19	16	15	29
		Minimum	0	0	0	2	0	0
		25% Percentile	0	1	1	2	0	0
		Median	0	2	2	2	1	0
		75% Percentile	0.5	3	2	3	1	0
		Maximum	3	4	4	4	3	0
		Mean	0.44	1.739	1.632	2.5	0.8667	0
		Std. Deviation	0.9165	1.322	0.9551	0.7303	1.06	0
		Std. Error of Mean	0.1833	0.2756	0.2191	0.1826	0.2737	0
		Lower 95% CI	0.06168	1.168	1.171	2.111	0.2796	0
		Upper 95% CI	0.8183	2.311	2.092	2.889	1.454	0
	software - GraphPad	Two-way ANOVA	Ordinary		Source of Variation	% of total variation	P value	P value summary	Significant?		ANOVA table	SS (Type III)	DF	MS	F (DFn, DFd)	P value
		Alpha	0.05		Interaction	34.16	<0.0001	****	Yes		Interaction	49.3	5	9.86	F (5, 582) = 83.39	P<0.0001
					Row Factor	18.13	<0.0001	****	Yes		Row Factor	26.16	5	5.232	F (5, 582) = 44.25	P<0.0001
					Column Factor	0.5757	0.0082	**	Yes		Column Factor	0.8308	1	0.8308	F (1, 582) = 7.027	P=0.0082
											Residual	68.82	582	0.1182
		Tukey's multiple comparisons test	Mean Diff.	95.00% CI of diff.	Significant?	Summary	Adjusted P Value		Test details	Mean 1	Mean 2	Mean Diff.	SE of diff.	N1	N2	q	DF
	software - GraphPad	30h vs. 36h	-0.2922	-0.4305 to -0.1538	Yes	****	<0.0001		30h vs. 36h	0.1078	0.4	-0.2922	0.04839	102	100	8.538	582
		36h vs. 42h	0.0125	-0.135 to 0.16	No	ns	0.9999		36h vs. 42h	0.4	0.3875	0.0125	0.05158	100	80	0.3427	582
		42h vs. 48h	-0.2577	-0.424 to -0.09131	Yes	***	0.0002		42h vs. 48h	0.3875	0.6452	-0.2577	0.05818	80	62	6.263	582
		48h vs. 60h	0.5039	0.3423 to 0.6654	Yes	****	<0.0001		48h vs. 60h	0.6452	0.1413	0.5039	0.0565	62	92	12.61	582
		60h vs. 72h	0.1413	0.01237 to 0.2702	Yes	*	0.0223		60h vs. 72h	0.1413	0	0.1413	0.0451	92	158	4.431	582

## Sheet: Figure 6
Figure 6 D, E, F, G	muscle fluorescence/bead fluorescence for salmIR vs control
			Figure 6G - unc-89			Figure 6D - Strn-Mlck			Figure 6E - Fln			Figure 6F - Mhc
	Descriptive statistics		act88func89xw-	act88func89xsalmIR		act88fstrnxw-	act88fstrnxsalmIR		Act88FFlnxw-	Act88FFlnxsalm		Act88FMhcxw-	Act88FMhcxsalmIR
		Number of animals/biological replicates	10	15		10	10		10	15		10	15
		Number of Hemithoraxes	20	30		20	20		20	30		20	30
		technical replicates/experimental repetitions	2	3		2	2		2	3		2	3
		Number of values (images analyzed)	42	49		44	43		45	52		49	68
		Minimum	0.05481	0.07775		0.2946	0.1725		0.1939	0.06558		0.2025	0.1504
		25% Percentile	0.1023	0.102		0.3641	0.2054		0.2622	0.1324		0.3059	0.2678
		Median	0.1471	0.1205		0.4144	0.2555		0.3598	0.2077		0.4449	0.3457
		75% Percentile	0.1718	0.164		0.5061	0.2844		0.4315	0.2603		0.5913	0.4929
		Maximum	0.2545	0.2178		0.6978	0.3542		0.6035	0.3986		0.928	0.8178
		Mean	0.1405	0.1301		0.4363	0.2504		0.3628	0.2081		0.4594	0.388
		Std. Deviation	0.04575	0.03732		0.09939	0.04881		0.1098	0.08934		0.1805	0.1534
		Std. Error of Mean	0.007059	0.005331		0.01498	0.007444		0.01636	0.01239		0.02579	0.0186
		Lower 95% CI	0.1262	0.1194		0.4061	0.2353		0.3299	0.1832		0.4076	0.3509
		Upper 95% CI	0.1547	0.1408		0.4665	0.2654		0.3958	0.2329		0.5113	0.4252
			act88func89xsalmIR			act88fstrnxsalmIR			Act88FFlnxsalm			Act88FMhcxsalmIR
			vs.			vs.			vs.			vs.
			act88func89xw-			act88fstrnxw-			Act88FFlnxw-			Act88FMhcxw-
	software - GraphPad	Unpaired t test				Unpaired t test			Unpaired t test			Unpaired t test
		P value	0.239			<0.0001			<0.0001			0.023
		P value summary	ns			****			****			*
		Significantly different (P < 0.05)?	No			Yes			Yes			Yes
		One- or two-tailed P value?	Two-tailed			Two-tailed			Two-tailed			Two-tailed
		t, df	t=1.185 df=89			t=11.03 df=85			t=7.654 df=95			t=2.305 df=115
		How big is the difference?
		Mean ± SEM of column A	0.1405 ± 0.007059, n=42			0.4363 ± 0.01498, n=44			0.3628 ± 0.01636, n=45			0.4594 ± 0.02579, n=49
		Mean ± SEM of column B	0.1301 ± 0.005331, n=49			0.2504 ± 0.007444, n=43			0.2081 ± 0.01239, n=52			0.388 ± 0.0186, n=68
		Difference between means	-0.01032 ± 0.008709			-0.1859 ± 0.01685			-0.1548 ± 0.02022			-0.07138 ± 0.03097
		95% confidence interval	-0.02763 to 0.006981			-0.2194 to -0.1524			-0.1949 to -0.1146			-0.1327 to -0.01003
		R squared (eta squared)	0.01554			0.5889			0.3814			0.04415
		F test to compare variances
		F, DFn, Dfd	1.503, 41, 48			4.147, 43, 42			1.509, 44, 51			1.385, 48, 67
		P value	0.1748			<0.0001			0.1565			0.2171
		P value summary	ns			****			ns			ns
		Significantly different (P < 0.05)?	No			Yes			No			No
Figure 6 - Supplement 3A-E	muscle fluorescence/bead fluorescence for developmental timecourses for Mhc-GFP, Unc-89-GFP, Fln-GFP, Strn-Mlck-GFP and Mef2-Gal4>UAS-GMA-GFP
	Descriptive statistics		Mef2GMA 30h	Mef2GMA 48h	Mef2GMA 72h	Mef2GMA 90h	Mef2GMA 1d	88F,unc89 30h	88F,unc89 48h	88F,unc89 72h	88F,unc89 90h	88F,unc89 1d	88F,Mhc 30h	88F,Mhc 48h	88F,Mhc 72h	88F,Mhc 90h	88F,Mhc 1d	88F,strn 48h	88F,strn 72h	88F,strn 90h	88F,strn 1d	88F,fln 30h	88F,fln 48h	88F,fln 72h	88F,fln 90h	88F,fln 1d
		Number of animals/biological replicates	15	10	10	10	10	15	10	10	10	10	10	10	10	10	10	20	35	29	27	10	10	10	10	10
		Number of Hemithoraxes	30	20	20	20	20	30	20	20	20	20	20	20	20	20	20	40	70	58	54	20	20	20	20	20
		technical replicates/experimental repetitions	3	2	2	2	2	3	2	2	2	2	2	2	2	2	2	4	6	6	5	2	2	2	2	2
		Number of values (individual images analyzed)	60	31	46	42	28	80	42	42	49	34	43	56	88	37	44	95	170	140	130	19	94	63	65	41
		Minimum	0.4753	0.4667	0.277	0.261	0.1493	0.002884	0.02987	0.0403	0.06133	0.04621	0.01772	0.0427	0.1006	0.177	0.2187	0.001292	0.1864	0.1621	0.1606	0.0003256	0.03009	0.1149	0.1477	0.2039
		25% Percentile	0.7903	0.8355	0.5907	0.3894	0.2486	0.007159	0.04113	0.0766	0.08522	0.07203	0.03674	0.08784	0.199	0.2479	0.3055	0.01003	0.3228	0.3798	0.4001	0.001213	0.09525	0.2319	0.2412	0.2534
		Median	0.9387	1.061	0.7198	0.4926	0.3583	0.01203	0.06063	0.09459	0.101	0.08513	0.04552	0.111	0.2575	0.3511	0.3464	0.01539	0.4344	0.4392	0.5111	0.002015	0.1588	0.3212	0.2969	0.2854
		75% Percentile	1.141	1.272	0.8623	0.6669	0.4434	0.0182	0.08207	0.1262	0.1191	0.1181	0.05992	0.1406	0.3284	0.4549	0.3906	0.02233	0.5192	0.5509	0.6028	0.004588	0.2878	0.4276	0.345	0.344
		Maximum	1.371	1.549	1.05	1.072	0.5388	0.03376	0.1178	0.1682	0.1758	0.1472	0.09442	0.2044	0.4785	0.5585	0.541	0.1103	1.142	0.9726	1.076	0.01685	0.4904	0.5958	0.4573	0.4754
		Mean	0.9478	1.036	0.7181	0.5501	0.3545	0.01294	0.06166	0.1012	0.1027	0.09151	0.04895	0.1152	0.2643	0.3507	0.353	0.01994	0.4314	0.463	0.5185	0.003694	0.1846	0.3311	0.2929	0.2966
		Std. Deviation	0.2364	0.3035	0.1881	0.2026	0.1114	0.007079	0.02318	0.03208	0.02416	0.02674	0.01594	0.03722	0.08287	0.1098	0.07008	0.01832	0.1472	0.1316	0.1571	0.004206	0.1094	0.1197	0.0663	0.05955
		Std. Error of Mean	0.03052	0.05451	0.02773	0.03127	0.02105	0.0007914	0.003577	0.00495	0.003451	0.004587	0.002431	0.004974	0.008834	0.01806	0.01057	0.00188	0.01129	0.01112	0.01378	0.0009649	0.01129	0.01508	0.008223	0.009299
		Lower 95% CI	0.8867	0.9247	0.6622	0.487	0.3113	0.01136	0.05444	0.09116	0.09575	0.08218	0.04405	0.1052	0.2467	0.314	0.3317	0.01621	0.4091	0.441	0.4912	0.001667	0.1621	0.3009	0.2765	0.2778
		Upper 95% CI	1.009	1.147	0.7739	0.6133	0.3977	0.01451	0.06888	0.1112	0.1096	0.1008	0.05386	0.1252	0.2818	0.3873	0.3743	0.02367	0.4536	0.485	0.5457	0.005721	0.207	0.3612	0.3094	0.3154
	software - GraphPad	ANOVA summary
		F	270		Brown-Forsythe test			Bartlett's test			ANOVA table	SS	DF	MS	F (DFn, DFd)	P value		Data summary
		P value	<0.0001		F (DFn, DFd)	35.68 (23, 1515)		Bartlett's statistic (corrected)	1659		Treatment (between columns)	93.59	23	4.069	F (23, 1515) = 270	P<0.0001		Number of treatments (columns)	24
		P value summary	****		P value	<0.0001		P value	<0.0001		Residual (within columns)	22.83	1515	0.01507				Number of values (total)	1539
		Significant diff. among means (P < 0.05)?	Yes		P value summary	****		P value summary	****		Total	116.4	1538
		R square	0.8039		Are SDs significantly different (P < 0.05)?	Yes		Are SDs significantly different (P < 0.05)?	Yes
	software - GraphPad	Tukey's multiple comparisons test	Mean Diff.	95.00% CI of diff.	Significant?	Summary	Adjusted P Value		Test details	Mean 1	Mean 2	Mean Diff.	SE of diff.	n1	n2	q	DF
		Mef2GMA 30h vs. Mef2GMA 48h	-0.08815	-0.1871 to 0.01079	No	ns	0.1632		Mef2GMA 30h vs. Mef2GMA 48h	0.9478	1.036	-0.08815	0.02715	60	31	4.592	1515
		Mef2GMA 48h vs. Mef2GMA 72h	0.3179	0.2139 to 0.4218	Yes	****	<0.0001		Mef2GMA 48h vs. Mef2GMA 72h	1.036	0.7181	0.3179	0.02852	31	46	15.76	1515
		Mef2GMA 30h vs. Mef2GMA 72h	0.2297	0.1421 to 0.3174	Yes	****	<0.0001		Mef2GMA 30h vs. Mef2GMA 72h	0.9478	0.7181	0.2297	0.02406	60	46	13.51	1515
		Mef2GMA 30h vs. Mef2GMA 90h	0.3977	0.3077 to 0.4877	Yes	****	<0.0001		Mef2GMA 30h vs. Mef2GMA 90h	0.9478	0.5501	0.3977	0.0247	60	42	22.77	1515
		Mef2GMA 30h vs. Mef2GMA 1d	0.5933	0.4909 to 0.6957	Yes	****	<0.0001		Mef2GMA 30h vs. Mef2GMA 1d	0.9478	0.3545	0.5933	0.02809	60	28	29.87	1515
		88F,unc89 30h vs. 88F,unc89 48h	-0.04872	-0.134 to 0.03651	No	ns	0.9202		88F,unc89 30h vs. 88F,unc89 48h	0.01294	0.06166	-0.04872	0.02339	80	42	2.946	1515
		88F,unc89 48h vs. 88F,unc89 72h	-0.0395	-0.1371 to 0.05812	No	ns	0.9989		88F,unc89 48h vs. 88F,unc89 72h	0.06166	0.1012	-0.0395	0.02679	42	42	2.085	1515
		88F,unc89 30h vs. 88F,unc89 72h	-0.08822	-0.1735 to -0.002983	Yes	*	0.0324		88F,unc89 30h vs. 88F,unc89 72h	0.01294	0.1012	-0.08822	0.02339	80	42	5.334	1515
		88F,unc89 30h vs. 88F,unc89 90h	-0.08975	-0.1709 to -0.008602	Yes	*	0.0125		88F,unc89 30h vs. 88F,unc89 90h	0.01294	0.1027	-0.08975	0.02227	80	49	5.7	1515
		88F,unc89 30h vs. 88F,unc89 1d	-0.07858	-0.1702 to 0.013	No	ns	0.2209		88F,unc89 30h vs. 88F,unc89 1d	0.01294	0.09151	-0.07858	0.02513	80	34	4.422	1515
		88F,Mhc 30h vs. 88F,Mhc 48h	-0.06624	-0.1569 to 0.02446	No	ns	0.5477		88F,Mhc 30h vs. 88F,Mhc 48h	0.04895	0.1152	-0.06624	0.02489	43	56	3.764	1515
		88F,Mhc 30h vs. 88F,Mhc 72h	-0.2153	-0.2985 to -0.1321	Yes	****	<0.0001		88F,Mhc 30h vs. 88F,Mhc 72h	0.04895	0.2643	-0.2153	0.02284	43	88	13.33	1515
		88F,Mhc 48h vs. 88F,Mhc 72h	-0.1491	-0.2255 to -0.07261	Yes	****	<0.0001		88F,Mhc 48h vs. 88F,Mhc 72h	0.1152	0.2643	-0.1491	0.02098	56	88	10.05	1515
		88F,Mhc 30h vs. 88F,Mhc 90h	-0.3017	-0.402 to -0.2014	Yes	****	<0.0001		88F,Mhc 30h vs. 88F,Mhc 90h	0.04895	0.3507	-0.3017	0.02753	43	37	15.5	1515
		88F,Mhc 30h vs. 88F,Mhc 1d	-0.3041	-0.4 to -0.2081	Yes	****	<0.0001		88F,Mhc 30h vs. 88F,Mhc 1d	0.04895	0.353	-0.3041	0.02632	43	44	16.34	1515
		88F,strn 48h vs. 88F,strn 72h	-0.4114	-0.4687 to -0.3541	Yes	****	<0.0001		88F,strn 48h vs. 88F,strn 72h	0.01994	0.4314	-0.4114	0.01572	95	170	37	1515
		88F,strn 48h vs. 88F,strn 90h	-0.4431	-0.5025 to -0.3836	Yes	****	<0.0001		88F,strn 48h vs. 88F,strn 90h	0.01994	0.463	-0.4431	0.01632	95	140	38.4	1515
		88F,strn 48h vs. 88F,strn 1d	-0.4985	-0.5589 to -0.4382	Yes	****	<0.0001		88F,strn 48h vs. 88F,strn 1d	0.01994	0.5185	-0.4985	0.01657	95	130	42.55	1515
		88F,fln 30h vs. 88F,fln 48h	-0.1809	-0.2934 to -0.06835	Yes	****	<0.0001		88F,fln 30h vs. 88F,fln 48h	0.003694	0.1846	-0.1809	0.03088	19	94	8.284	1515
		88F,fln 30h vs. 88F,fln 72h	-0.3274	-0.4444 to -0.2103	Yes	****	<0.0001		88F,fln 48h vs. 88F,fln 72h	0.1846	0.3311	-0.1465	0.01999	94	63	10.37	1515
		88F,fln 48h vs. 88F,fln 72h	-0.1465	-0.2193 to -0.07368	Yes	****	<0.0001		88F,fln 30h vs. 88F,fln 72h	0.003694	0.3311	-0.3274	0.03213	19	63	14.41	1515
		88F,fln 30h vs. 88F,fln 90h	-0.2892	-0.4059 to -0.1726	Yes	****	<0.0001		88F,fln 30h vs. 88F,fln 90h	0.003694	0.2929	-0.2892	0.03201	19	65	12.78	1515
		88F,fln 30h vs. 88F,fln 1d	-0.2929	-0.417 to -0.1688	Yes	****	<0.0001		88F,fln 30h vs. 88F,fln 1d	0.003694	0.2966	-0.2929	0.03407	19	41	12.16	1515

## Sheet: Figure7
Figure 7I	Calculation of myofibril width in Act88F x w- (control) vs salmIR
	Descriptive statistics		48h w-	72h w-	90h w-	0d w-	1d w-	48h salm	72h salm	90h salm	0d salm	1d salm
		Number of animals/biological replicates	17	21	18	11	10	16	18	18	12	11
		technical replicates/experimental repetitions	2	2	2	1	1	2	2	2	1	1
		Number of values	55	134	118	61	33	52	115	118	81	79
		Minimum	0.332	0.415	0.498	0.664	0.996	0.332	0.415	0.415	0.332	0.498
		25% Percentile	0.415	0.581	0.747	0.83	1.079	0.415	0.498	0.664	0.83	0.83
		Median	0.415	0.664	0.83	0.913	1.162	0.415	0.581	0.747	0.913	0.996
		75% Percentile	0.498	0.6848	0.913	0.996	1.162	0.498	0.664	0.83	1.162	1.245
		Maximum	0.498	0.83	1.079	1.162	1.245	0.498	0.83	1.079	1.494	1.993
		Mean	0.4512	0.6454	0.8005	0.9103	1.147	0.4389	0.6091	0.7435	0.9458	1.08
		Std. Deviation	0.04451	0.09083	0.1506	0.1312	0.06709	0.04746	0.09256	0.1489	0.264	0.2946
		Std. Error of Mean	0.006001	0.007847	0.01386	0.0168	0.01168	0.006581	0.008631	0.01371	0.02933	0.03314
		Lower 95% CI	0.4392	0.6299	0.773	0.8767	1.123	0.4257	0.592	0.7163	0.8874	1.014
		Upper 95% CI	0.4633	0.6609	0.8279	0.9439	1.171	0.4522	0.6262	0.7706	1.004	1.146
	software - GraphPad	ANOVA summary
		F	142.9		Brown-Forsythe test			Bartlett's test			ANOVA table	SS	DF	MS	F (DFn, DFd)	P value		Data summary
		P value	<0.0001		F (DFn, DFd)	29.57 (9, 836)		Bartlett's statistic (corrected)	456.9		Treatment (between columns)	32.41	9	3.602	F (9, 836) = 142.9	P<0.0001		Number of treatments (columns)	10
		P value summary	****		P value	<0.0001		P value	<0.0001		Residual (within columns)	21.06	836	0.0252				Number of values (total)	846
		Significant diff. among means (P < 0.05)?	Yes		P value summary	****		P value summary	****		Total	53.48	845
		R square	0.6061		Are SDs significantly different (P < 0.05)?	Yes		Are SDs significantly different (P < 0.05)?	Yes
	software - GraphPad	multiple comparisons tests
		Tukey's multiple comparisons test	Mean Diff.	95.00% CI of diff.	Significant?	Summary	Adjusted P Value		Test details	Mean 1	Mean 2	Mean Diff.	SE of diff.	n1	n2	q	DF
		48h w- vs. 48h salm	0.01228	-0.08512 to 0.1097	No	ns	>0.9999		48h w- vs. 48h salm	0.4512	0.4389	0.01228	0.0307	55	52	0.5654	836
		72h w- vs. 72h salm	0.03627	-0.02774 to 0.1003	No	ns	0.7368		72h w- vs. 72h salm	0.6454	0.6091	0.03627	0.02018	134	115	2.542	836
		90h w- vs. 90h salm	0.05697	-0.008582 to 0.1225	No	ns	0.1532		90h w- vs. 90h salm	0.8005	0.7435	0.05697	0.02067	118	118	3.899	836
		1d w- vs. 1d salm	-0.03551	-0.1209 to 0.04985	No	ns	0.9491		1d w- vs. 1d salm	0.9103	0.9458	-0.03551	0.02691	61	81	1.866	836
		2d w- vs. 2d salm	0.06676	-0.03761 to 0.1711	No	ns	0.5786		2d w- vs. 2d salm	1.147	1.08	0.06676	0.0329	33	79	2.87	836
Figure 7J	Calculation of sarcomere length in Act88F x w- (control) vs salmIR
	Descriptive Statistics		48h w-	72h w-	90h w-	1d w-	2d w-	48h salm	72h salm	90h salm	1d salm	2d salm
		Number of animals/biological replicates	17	21	18	11	10	16	18	18	12	11
		technical replicates/experimental repetitions	2	2	2	1	1	2	2	2	1	1
		Number of values	55	117	107	58	55	51	88	83	55	36
		Minimum	1.771	2.237	2.501	2.834	2.834	1.635	1.518	2.024	2.024	1.119
		25% Percentile	1.932	2.501	2.834	3.27	3.27	1.771	2.237	2.501	2.657	2.125
		Median	1.932	2.657	3.036	3.472	3.542	1.932	2.362	2.657	2.834	2.579
		75% Percentile	1.932	2.834	3.27	3.542	3.542	1.932	2.657	2.834	3.036	2.79
		Maximum	2.125	3.036	3.27	3.542	3.542	2.125	2.743	3.036	3.542	3.542
		Mean	1.904	2.681	3.04	3.374	3.377	1.862	2.386	2.618	2.844	2.461
		Std. Deviation	0.06889	0.2108	0.2157	0.2024	0.2353	0.1071	0.2497	0.2327	0.3642	0.6216
		Std. Error of Mean	0.009289	0.01949	0.02085	0.02657	0.03172	0.015	0.02662	0.02554	0.0491	0.1036
		Lower 95% CI	1.885	2.643	2.999	3.321	3.313	1.832	2.333	2.567	2.746	2.25
		Upper 95% CI	1.922	2.72	3.082	3.427	3.44	1.892	2.439	2.669	2.942	2.671
	software - GraphPad	ANOVA summary
		F	242.4		Brown-Forsythe test			Bartlett's test			ANOVA table	SS	DF	MS	F (DFn, DFd)	P value		Data summary
		P value	<0.0001		F (DFn, DFd)	17.84 (9, 695)		Bartlett's statistic (corrected)	283		Treatment (between columns)	146.9	9	16.32	F (9, 695) = 242.4	P<0.0001		Number of treatments (columns)	10
		P value summary	****		P value	<0.0001		P value	<0.0001		Residual (within columns)	46.78	695	0.06731				Number of values (total)	705
		Significant diff. among means (P < 0.05)?	Yes		P value summary	****		P value summary	****		Total	193.7	704
		R square	0.7584		Are SDs significantly different (P < 0.05)?	Yes		Are SDs significantly different (P < 0.05)?	Yes
	software - GraphPad	multiple comparisons tests
		Tukey's multiple comparisons test	Mean Diff.	95.00% CI of diff.	Significant?	Summary	Adjusted P Value		Test details	Mean 1	Mean 2	Mean Diff.	SE of diff.	n1	n2	q	DF
		48h w- vs. 48h salm	0.04187	-0.1182 to 0.202	No	ns	0.9981		48h w- vs. 48h salm	1.904	1.862	0.04187	0.05044	55	51	1.174	695
		72h w- vs. 72h salm	0.2954	0.1792 to 0.4116	Yes	****	<0.0001		72h w- vs. 72h salm	2.681	2.386	0.2954	0.03661	117	88	11.41	695
		90h w- vs. 90h salm	0.4221	0.3017 to 0.5426	Yes	****	<0.0001		90h w- vs. 90h salm	3.04	2.618	0.4221	0.03795	107	83	15.73	695
		1d w- vs. 1d salm	0.53	0.375 to 0.685	Yes	****	<0.0001		1d w- vs. 1d salm	3.374	2.844	0.53	0.04883	58	55	15.35	695
		2d w- vs. 2d salm	0.9159	0.7393 to 1.092	Yes	****	<0.0001		2d w- vs. 2d salm	3.377	2.461	0.9159	0.05562	55	36	23.29	695
Figure 7J	Observed twitches in Act88F x w- (control) vs salmIR
	Descriptive statistics		88Fxw-,72h	88FxsalmIR,72h	88Fxw-,48h	88FxsalmIR,48h
		Number of animals/biological replicates	13	15	11	15
		Number of fibers observed	37	44	14	22
		technical replicates/experimental repetitions	2	2	2	2
		Number of values	37	44	14	22
		Minimum	0	0	1	0
		25% Percentile	0	0	1	0
		Median	0	1	1	1
		75% Percentile	0	2	2	1
		Maximum	0	6	2	1
		Mean	0	1.386	1.429	0.6364
		Std. Deviation	0	1.45	0.5136	0.4924
		Std. Error of Mean	0	0.2186	0.1373	0.105
		Lower 95% CI	0	0.9455	1.132	0.4181
		Upper 95% CI	0	1.827	1.725	0.8547
	software-GraphPad	Two-way ANOVA	Ordinary		Source of Variation	% of total variation	P value	P value summary	Significant?		ANOVA table	SS (Type III)	DF	MS	F (DFn, DFd)	P value
		Alpha	0.05		Interaction	8.888	<0.0001	****	Yes		Interaction	14.97	3	4.99	F (3, 226) = 10.09	P<0.0001
					Row Factor	13.33	<0.0001	****	Yes		Row Factor	22.46	3	7.485	F (3, 226) = 15.13	P<0.0001
					Column Factor	6.693	<0.0001	****	Yes		Column Factor	11.27	1	11.27	F (1, 226) = 22.78	P<0.0001
											Residual	111.8	226	0.4948
	software-GraphPad	Tukey's multiple comparisons test	Mean Diff.	95.00% CI of diff.	Significant?	Summary	Adjusted P Value		Test details	Mean 1	Mean 2	Mean Diff.	SE of diff.	N1	N2	q	DF
		88Fxw-,48h vs. 88FxsalmIR,48h	0.3961	-0.04402 to 0.8362	No	ns	0.0944		88Fxw-,48h vs. 88FxsalmIR,48h	0.7143	0.3182	0.3961	0.17	28	44	3.294	226
		88Fxw-,72h vs. 88FxsalmIR,72h	-0.6932	-0.9803 to -0.406	Yes	****	<0.0001		88Fxw-,72h vs. 88FxsalmIR,72h	0	0.6932	-0.6932	0.1109	74	88	8.836	226
Figure 7 - Supplement 1A	Flight tests for Act88F x w- (control) and Act88F x salmIR
		Number of animals/biological replicates	technical replicates/experimental repetitions
	Flight tests for Act88FG4 x w-	198	3
	Flight tests for Act88FG4 x salmIR (GD)	197	3
	Flight tests for Act88FG4 x salmIR (KK)	200	2
	Flight tests for Act88FG4 x strnIR	87	2
	Flight tests for StrnMI02893/+	89	2
	Flight tests for StrnMI02893	230	2

## Sheet: Figure8
Figure 8K	Calculation of myofibril width in Strn mutants (wild-type values from w- from Figure 5)
	Descriptive statistics		48hWT	60hWT	72hWT	80hWT	90hWT	1dWT	48hstrn	60hStrn	72hStrn	80hStrn	90hStrn	1dStrn
		Number of animals/biological replicates	16	23	23	7	10	15	8	7	8	7	10	9
		technical replicates/experimental repetitions	2	3	2	1	1	2	1	1	1	1	1	1
		Number of values	55	47	64	20	30	45	14	17	22	22	28	27
		Minimum	0.332	0.457	0.581	0.83	0.747	0.913	0.328	0.498	0.664	0.664	0.747	1.079
		25% Percentile	0.415	0.581	0.706	0.913	0.83	1.079	0.3943	0.581	0.664	0.83	0.83	1.245
		Median	0.415	0.664	0.747	0.913	0.913	1.162	0.415	0.581	0.747	0.83	0.913	1.411
		75% Percentile	0.457	0.664	0.83	0.9753	0.9338	1.162	0.415	0.664	0.83	0.83	0.913	1.578
		Maximum	0.498	0.747	0.996	0.996	0.996	1.328	0.498	0.747	0.83	0.913	1.079	1.993
		Mean	0.4264	0.6341	0.7771	0.9213	0.8964	1.116	0.4088	0.5956	0.7508	0.8262	0.8893	1.451
		Std. Deviation	0.03868	0.07011	0.09502	0.05318	0.07675	0.1025	0.05158	0.06714	0.06519	0.05995	0.08409	0.2476
		Std. Error of Mean	0.005216	0.01023	0.01188	0.01189	0.01401	0.01528	0.01378	0.01628	0.0139	0.01278	0.01589	0.04766
		Lower 95% CI	0.416	0.6135	0.7534	0.8964	0.8677	1.085	0.379	0.5611	0.7219	0.7996	0.8567	1.353
		Upper 95% CI	0.4369	0.6547	0.8009	0.9462	0.9251	1.147	0.4386	0.6302	0.7797	0.8528	0.9219	1.549
	software - GraphPad	ANOVA summary
		F	273.9		Brown-Forsythe test			Bartlett's test			ANOVA table	SS	DF	MS	F (DFn, DFd)	P value		Data summary
		P value	<0.0001		F (DFn, DFd)	9.591 (12, 395)		Bartlett's statistic (corrected)	210.3		Treatment (between columns)	30.26	12	2.521	F (12, 395) = 273.9	P<0.0001		Number of treatments (columns)	13
		P value summary	****		P value	<0.0001		P value	<0.0001		Residual (within columns)	3.637	395	0.009206				Number of values (total)	408
		Significant diff. among means (P < 0.05)?	Yes		P value summary	****		P value summary	****		Total	33.89	407
		R square	0.8927		Are SDs significantly different (P < 0.05)?	Yes		Are SDs significantly different (P < 0.05)?	Yes
	software - GraphPad	Tukey's multiple comparisons test	Mean Diff.	95.00% CI of diff.	Significant?	Summary	Adjusted P Value		Test details	Mean 1	Mean 2	Mean Diff.	SE of diff.	n1	n2	q	DF
		48hWT vs. 48hstrn	0.01763	-0.07811 to 0.1134	No	ns	>0.9999		48hWT vs. 48hstrn	0.4264	0.4088	0.01763	0.02872	55	14	0.8682	395
		60hWT vs. 60hStrn	0.03846	-0.05206 to 0.129	No	ns	0.9714		60hWT vs. 60hStrn	0.6341	0.5956	0.03846	0.02716	47	17	2.003	395
		72hWT vs. 72hStrn	0.02635	-0.05269 to 0.1054	No	ns	0.9965		72hWT vs. 72hStrn	0.7771	0.7508	0.02635	0.02371	64	22	1.572	395
		80hWT vs. 80hStrn	0.09507	-0.00374 to 0.1939	No	ns	0.0726		80hWT vs. 80hStrn	0.9213	0.8262	0.09507	0.02964	20	22	4.536	395
		90hWT vs. 90hStrn	0.007114	-0.07693 to 0.09115	No	ns	>0.9999		90hWT vs. 90hStrn	0.8964	0.8893	0.007114	0.02521	30	28	0.3991	395
		1dWT vs. 1dStrn	-0.3353	-0.4132 to -0.2575	Yes	****	<0.0001		1dWT vs. 1dStrn	1.116	1.451	-0.3353	0.02336	45	27	20.3	395
Figure 8L	Calculation of sarcomere length in Strn mutants (wild-type values from w- from Figure 5)
	Descriptive statistics		48hWT	60hWT	72hWT	80hWT	90hWT	100hWT	48hstrn	60hStrn	72hStrn	80hStrn	90hStrn	100hStrn
		Number of animals/biological replicates	16	23	23	7	10	15	8	7	8	7	10	9
		technical replicates/experimental repetitions	2	3	2	1	1	2	1	1	1	1	1	1
		Number of values	30	41	56	21	32	42	11	15	22	20	26	12
		Minimum	1.848	2.074	2.362	2.362	2.429	2.576	1.977	2.18	2.237	3.036	2.657	1.518
		25% Percentile	2.024	2.237	2.743	2.883	2.834	3.149	1.977	2.237	2.362	3.27	3.01	2.18
		Median	2.049	2.362	2.834	3.036	3.036	3.27	2.024	2.501	3.093	3.27	3.149	2.237
		75% Percentile	2.125	2.501	2.932	3.036	3.036	3.401	2.074	2.743	3.149	3.401	3.27	2.576
		Maximum	2.237	2.834	3.149	3.036	3.149	3.542	2.125	2.932	3.401	3.542	3.542	2.834
		Mean	2.055	2.391	2.826	2.924	2.929	3.239	2.03	2.52	2.876	3.307	3.123	2.314
		Std. Deviation	0.08429	0.1926	0.1672	0.208	0.2156	0.2399	0.05601	0.2583	0.4355	0.138	0.2375	0.3537
		Std. Error of Mean	0.01539	0.03007	0.02234	0.0454	0.03811	0.03702	0.01689	0.06669	0.09286	0.03085	0.04657	0.1021
		Lower 95% CI	2.024	2.33	2.781	2.829	2.852	3.164	1.992	2.377	2.683	3.243	3.027	2.09
		Upper 95% CI	2.087	2.452	2.871	3.019	3.007	3.314	2.067	2.663	3.069	3.372	3.219	2.539
	software - GraphPad	ANOVA summary
		F	92.54		Brown-Forsythe test			Bartlett's test			ANOVA table	SS	DF	MS	F (DFn, DFd)	P value		Data summary
		P value	<0.0001		F (DFn, DFd)	5.56 (12, 334)		Bartlett's statistic (corrected)	116.9		Treatment (between columns)	53.76	12	4.48	F (12, 334) = 92.54	P<0.0001		Number of treatments (columns)	13
		P value summary	****		P value	<0.0001		P value	<0.0001		Residual (within columns)	16.17	334	0.04841				Number of values (total)	347
		Significant diff. among means (P < 0.05)?	Yes		P value summary	****		P value summary	****		Total	69.94	346
		R square	0.7688		Are SDs significantly different (P < 0.05)?	Yes		Are SDs significantly different (P < 0.05)?	Yes
	software - GraphPad	Tukey's multiple comparisons test	Mean Diff.	95.00% CI of diff.	Significant?	Summary	Adjusted P Value		Test details	Mean 1	Mean 2	Mean Diff.	SE of diff.	n1	n2	q	DF
		48hWT vs. 48hstrn	0.02538	-0.2334 to 0.2842	No	ns	>0.9999		48hWT vs. 48hstrn	2.055	2.03	0.02538	0.07756	30	11	0.4628	334
		60hWT vs. 60hStrn	-0.1292	-0.3508 to 0.09233	No	ns	0.7665		60hWT vs. 60hStrn	2.391	2.52	-0.1292	0.0664	41	15	2.753	334
		72hWT vs. 72hStrn	-0.04991	-0.2347 to 0.1348	No	ns	0.9995		72hWT vs. 72hStrn	2.826	2.876	-0.04991	0.05536	56	22	1.275	334
		80hWT vs. 80hStrn	-0.3833	-0.6128 to -0.1539	Yes	****	<0.0001		80hWT vs. 80hStrn	2.924	3.307	-0.3833	0.06875	21	20	7.886	334
		90hWT vs. 90hStrn	-0.1932	-0.3871 to 0.0006408	No	ns	0.0517		90hWT vs. 90hStrn	2.929	3.123	-0.1932	0.05809	32	26	4.704	334
		1dWT vs. 1dStrn	0.9248	0.6844 to 1.165	Yes	****	<0.0001		1dWT vs. 1dStrn	3.239	2.314	0.9248	0.07202	42	12	18.16	334
Figure 8M	Calculation of myofiber length in Strn mutants (wild-type values from w- from Figure 5)
	Descriptive statistics		48h	Strn48h	60h	Strn60h	72h	Strn72h	80h	Strn80h	90h	Strn90h
		Number of animals/biological replicates	19	10	20	9	15	10	20	9	25	12
		technical replicates/experimental repetitions	2	1	2	1	2	1	2	1	3	2
		Number of values	37	12	39	20	30	16	40	22	50	28
		Minimum	404.3	355.2	513.2	525.7	669	636.3	708.8	713.8	693.2	648.5
		25% Percentile	460.5	435.7	591.7	577.1	710	763	741	807.4	743.9	730.5
		Median	479.8	496.1	672.3	669	762.1	802.5	804.9	862.4	776.5	777.4
		75% Percentile	508.8	510.9	707	713.3	824.2	888.5	823.7	913.1	829.7	829.5
		Maximum	529.7	537.3	805.1	824.8	883.8	915.8	899.9	1045	934.4	961.6
		Mean	479.6	473.5	654.5	661.3	764.3	807.6	791.4	863.7	783.2	781.2
		Std. Deviation	32.91	59.18	77.44	89.39	63.52	79.18	52.55	90.02	56.4	70.53
		Std. Error of Mean	5.411	17.08	12.4	19.99	11.6	19.79	8.308	19.19	7.976	13.33
		Lower 95% CI	468.6	435.9	629.4	619.4	740.6	765.4	774.6	823.7	767.2	753.8
		Upper 95% CI	490.5	511.1	679.6	703.1	788.1	849.7	808.2	903.6	799.2	808.5
	software - GraphPad	ANOVA summary
		F	108.1		Brown-Forsythe test			Bartlett's test			ANOVA table	SS	DF	MS	F (DFn, DFd)	P value		Data summary
		P value	<0.0001		F (DFn, DFd)	3.744 (9, 284)		Bartlett's statistic (corrected)	41.31		Treatment (between columns)	4235703	9	470634	F (9, 284) = 108.1	P<0.0001		Number of treatments (columns)	10
		P value summary	****		P value	0.0002		P value	<0.0001		Residual (within columns)	1236351	284	4353				Number of values (total)	294
		Significant diff. among means (P < 0.05)?	Yes		P value summary	***		P value summary	****		Total	5472054	293
		R square	0.7741		Are SDs significantly different (P < 0.05)?	Yes		Are SDs significantly different (P < 0.05)?	Yes
	software - GraphPad	Tukey's multiple comparisons test	Mean Diff.	95.00% CI of diff.	Significant?	Summary	Adjusted P Value		Test details	Mean 1	Mean 2	Mean Diff.	SE of diff.	n1	n2	q	DF
		48h vs. Strn48h	6.012	-63.89 to 75.91	No	ns	>0.9999		48h vs. Strn48h	479.6	473.5	6.012	21.92	37	12	0.3879	284
		60h vs. Strn60h	-6.8	-64.67 to 51.07	No	ns	>0.9999		60h vs. Strn60h	654.5	661.3	-6.8	18.15	39	20	0.53	284
		72h vs. Strn72h	-43.22	-108.4 to 21.92	No	ns	0.5178		72h vs. Strn72h	764.3	807.6	-43.22	20.43	30	16	2.992	284
		80h vs. Strn80h	-72.22	-128.1 to -16.37	Yes	**	0.002		80h vs. Strn80h	791.4	863.7	-72.22	17.51	40	22	5.832	284
		90h vs. Strn90h	2.035	-47.63 to 51.7	No	ns	>0.9999		90h vs. Strn90h	783.2	781.2	2.035	15.57	50	28	0.1848	284
Figure 8N	Calculation of sarcomeres per myofibril in Strn mutants (wild-type values from w- from Figure 5)
	Descriptive statistics		48h	Strn48h	60h	Strn60h	72h	Strn72h	80h	Strn80h	90h	Strn90h
		Number of values	37	12	39	20	30	16	40	22	50	28
		Minimum	196.7	175	214.6	208.6	236.7	221.2	242.4	215.8	236.6	207.7
		25% Percentile	224.1	214.7	247.5	229	251.3	265.3	253.4	244.2	253.9	233.9
		Median	233.5	244.4	281.2	265.4	269.7	279	275.3	260.8	265.1	248.9
		75% Percentile	247.6	251.7	295.7	283	291.7	308.9	281.7	276.1	283.2	265.6
		Maximum	257.7	264.7	336.7	327.3	312.7	318.4	307.8	315.9	319	308
		Mean	233.3	233.3	273.7	262.4	270.5	280.8	270.7	261.2	267.4	250.2
		Std. Deviation	16.01	29.16	32.39	35.47	22.48	27.53	17.97	27.22	19.25	22.59
		Std. Error of Mean	2.633	8.417	5.186	7.931	4.104	6.883	2.842	5.804	2.723	4.269
		Lower 95% CI	228	214.8	263.2	245.8	262.1	266.1	264.9	249.1	261.9	241.4
		Upper 95% CI	238.7	251.8	284.2	279	278.9	295.5	276.4	273.2	272.8	258.9
	software - GraphPad	ANOVA summary
		F	11.57		Brown-Forsythe test			Bartlett's test			ANOVA table	SS	DF	MS	F (DFn, DFd)	P value		Data summary
		P value	<0.0001		F (DFn, DFd)	3.685 (9, 284)		Bartlett's statistic (corrected)	36.82		Treatment (between columns)	61795	9	6866	F (9, 284) = 11.57	P<0.0001		Number of treatments (columns)	10
		P value summary	****		P value	0.0002		P value	<0.0001		Residual (within columns)	168464	284	593.2				Number of values (total)	294
		Significant diff. among means (P < 0.05)?	Yes		P value summary	***		P value summary	****		Total	230258	293
		R square	0.2684		Are SDs significantly different (P < 0.05)?	Yes		Are SDs significantly different (P < 0.05)?	Yes
	software - GraphPad	Tukey's multiple comparisons test	Mean Diff.	95.00% CI of diff.	Significant?	Summary	Adjusted P Value		Test details	Mean 1	Mean 2	Mean Diff.	SE of diff.	n1	n2	q	DF
		48h vs. Strn48h	0.04219	-25.76 to 25.84	No	ns	>0.9999		48h vs. Strn48h	233.3	233.3	0.04219	8.091	37	12	0.007374	284
		60h vs. Strn60h	11.33	-10.03 to 32.7	No	ns	0.7993		60h vs. Strn60h	273.7	262.4	11.33	6.698	39	20	2.393	284
		72h vs. Strn72h	-10.33	-34.38 to 13.71	No	ns	0.9352		72h vs. Strn72h	270.5	280.8	-10.33	7.54	30	16	1.938	284
		80h vs. Strn80h	9.525	-11.09 to 30.14	No	ns	0.9016		80h vs. Strn80h	270.7	261.2	9.525	6.465	40	22	2.084	284
		90h vs. Strn90h	17.19	-1.139 to 35.53	No	ns	0.087		90h vs. Strn90h	267.4	250.2	17.19	5.749	50	28	4.23	284
